# Supplementary material for: Systematic optimization of a fragment-based force field against experimental pure-liquid properties considering large compound families: application to oxygen and nitrogen compounds
Source: Royal Society of Chemistry journal article supplement (doi:10.1039/d1cp02001c), 2021-01-01
Supplement: d1cp02001c1.pdf [file d1cp02001c1.pdf]

Supplementary Material to  
Systematic optimization of a fragment-based force field against  
experimental pure-liquid properties considering large compound  
families: Application to oxygen and nitrogen compounds.

Marina P. Oliveira and Philippe H. Hünenberger

## S.1 Compounds in the Calibration and Validation Sets

The structures of the compounds included in the calibration and validation sets are illustrated in Figs. S.1 and S.2, respectively.

Figure S.1: Structures of the  $N_{\text{iso}}^{\text{cal}} = 339$  molecules with 1-6 carbon atom included in the calibration set. See Tab. S.1 for the corresponding names and CAS registry numbers.

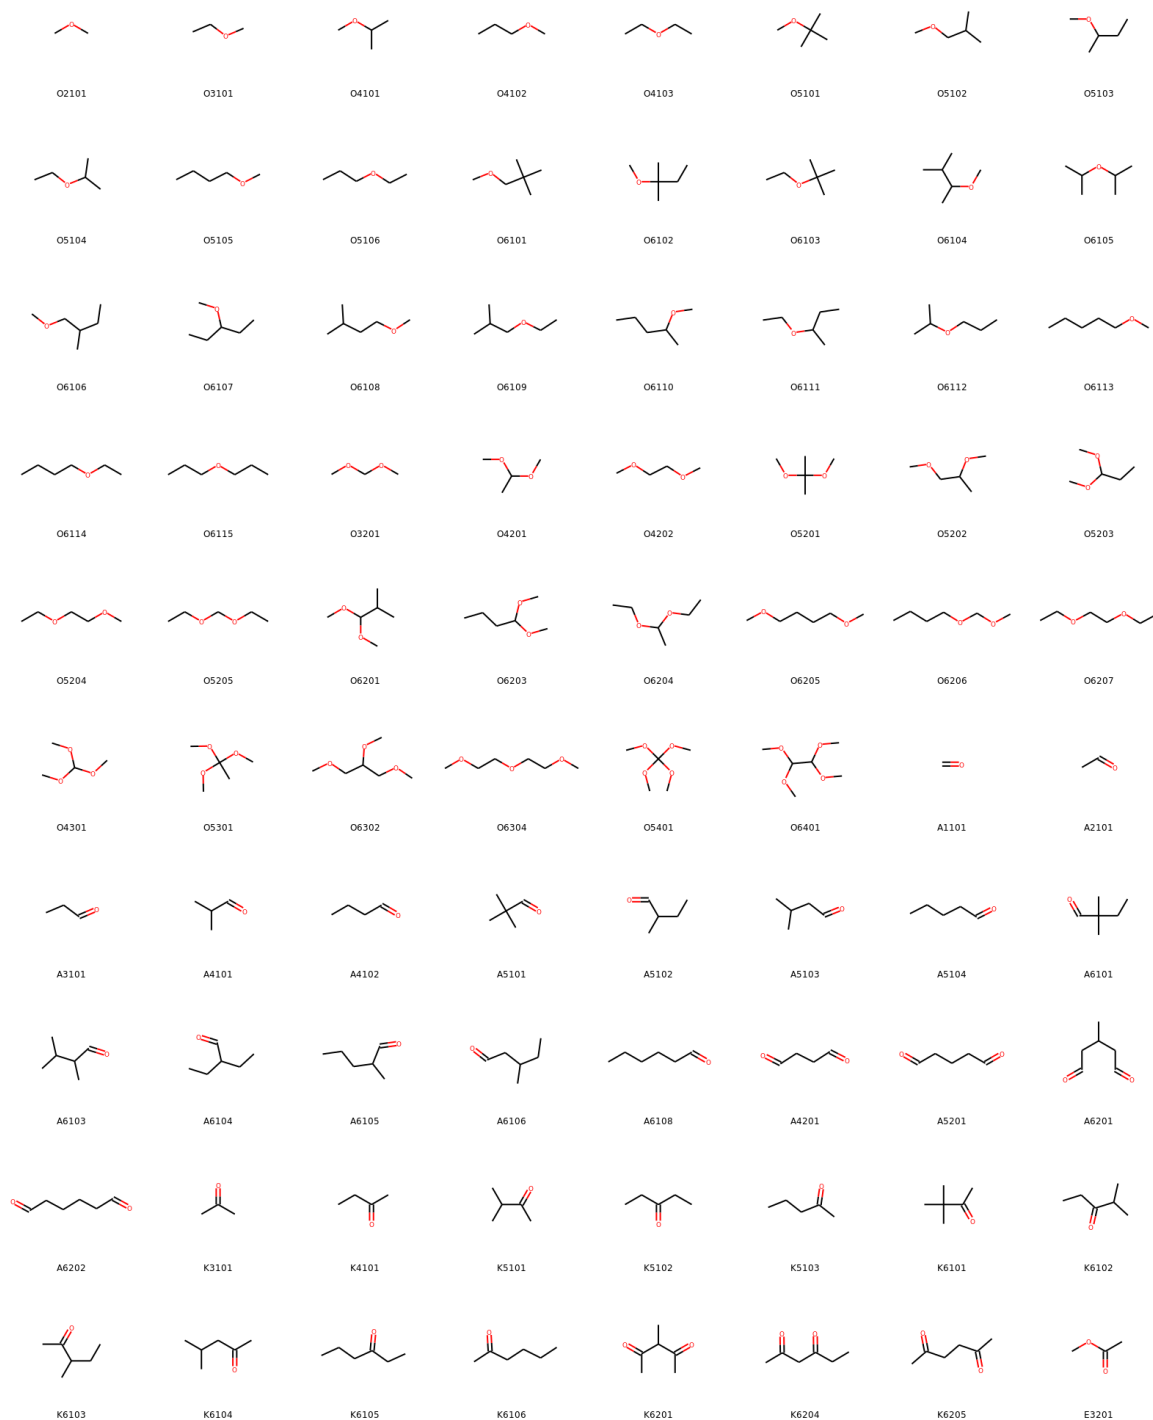

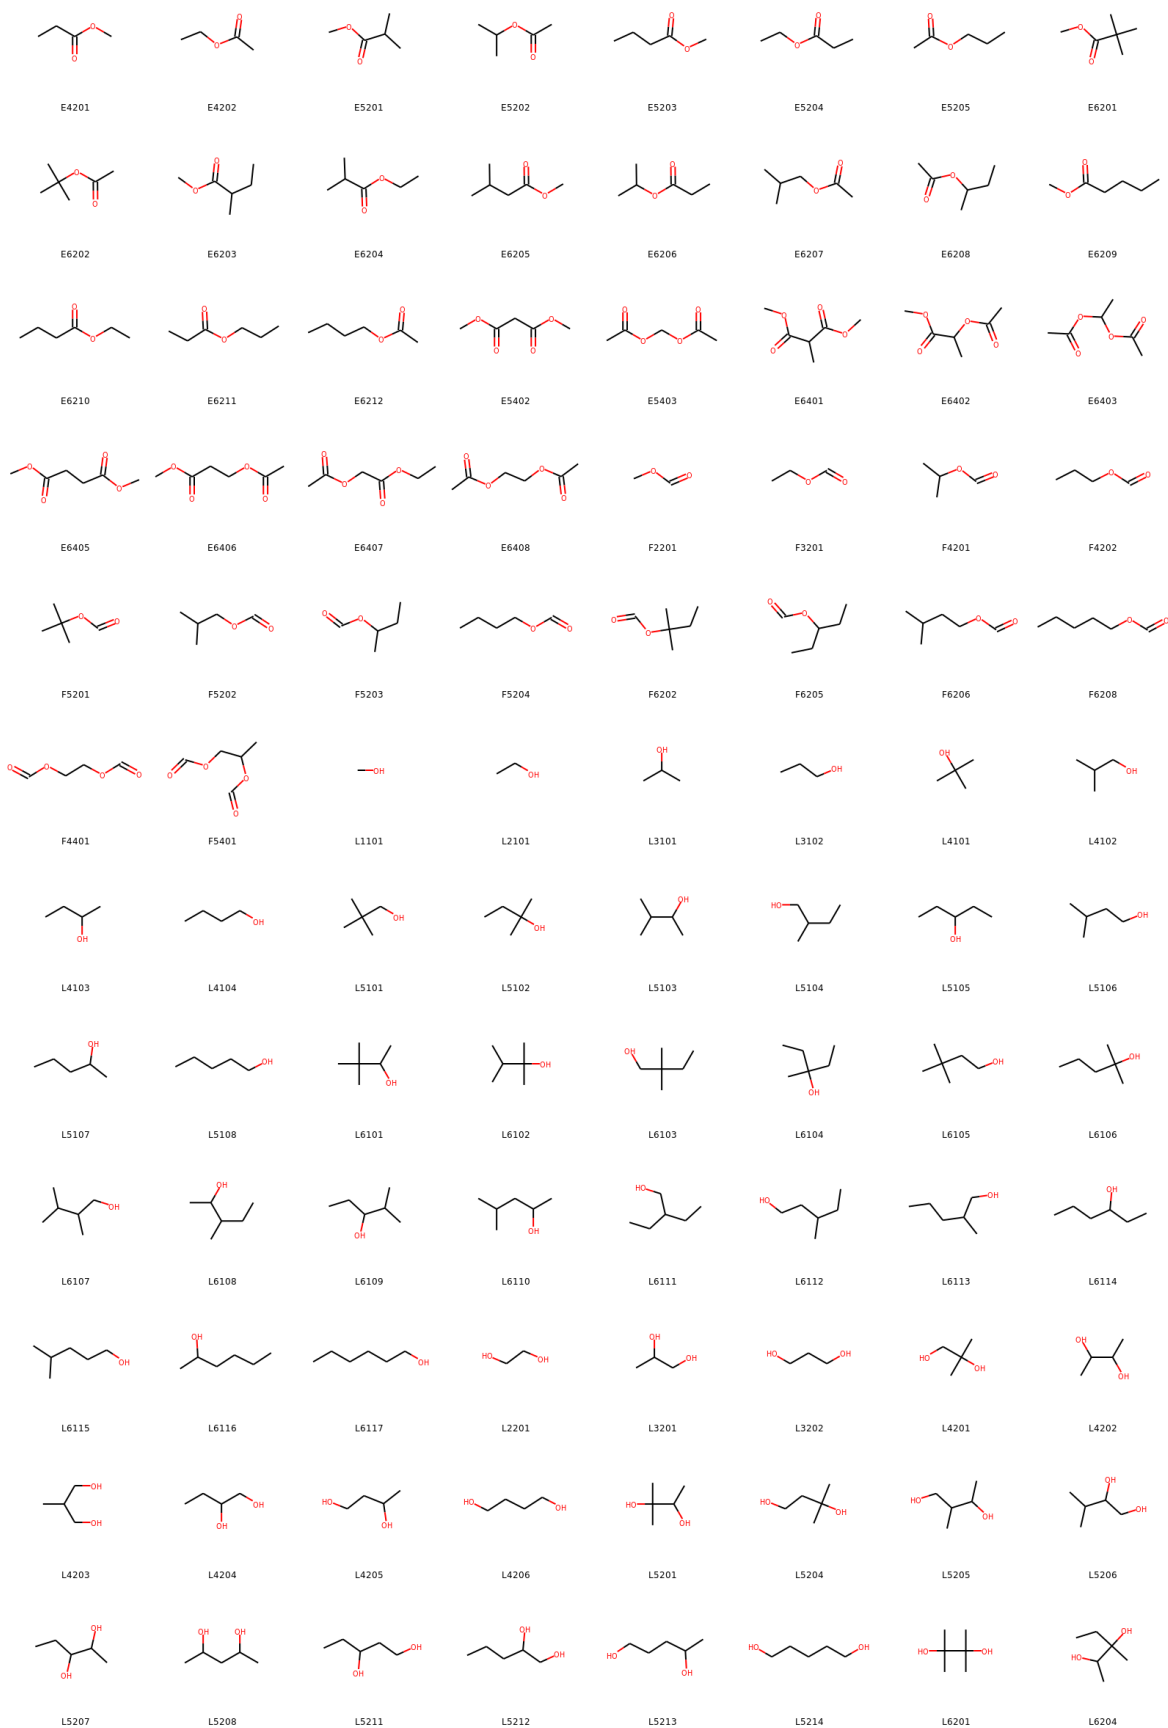

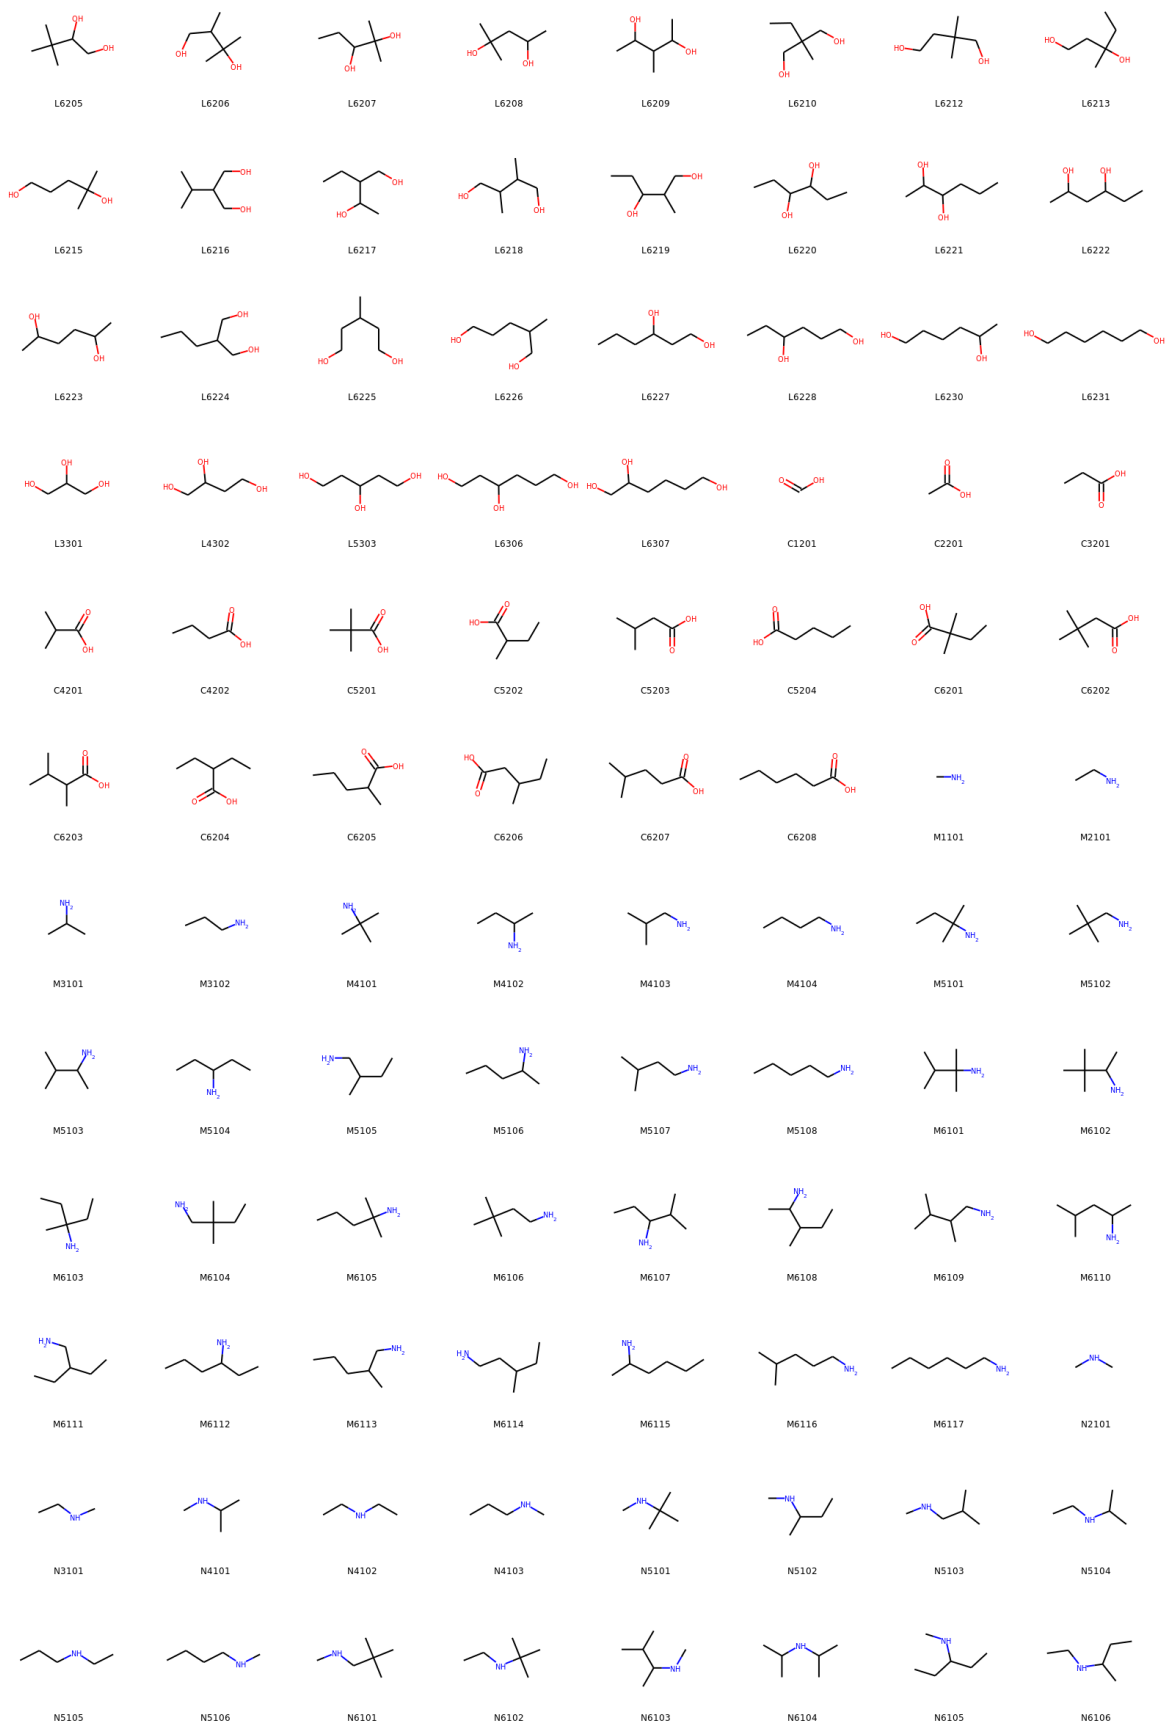

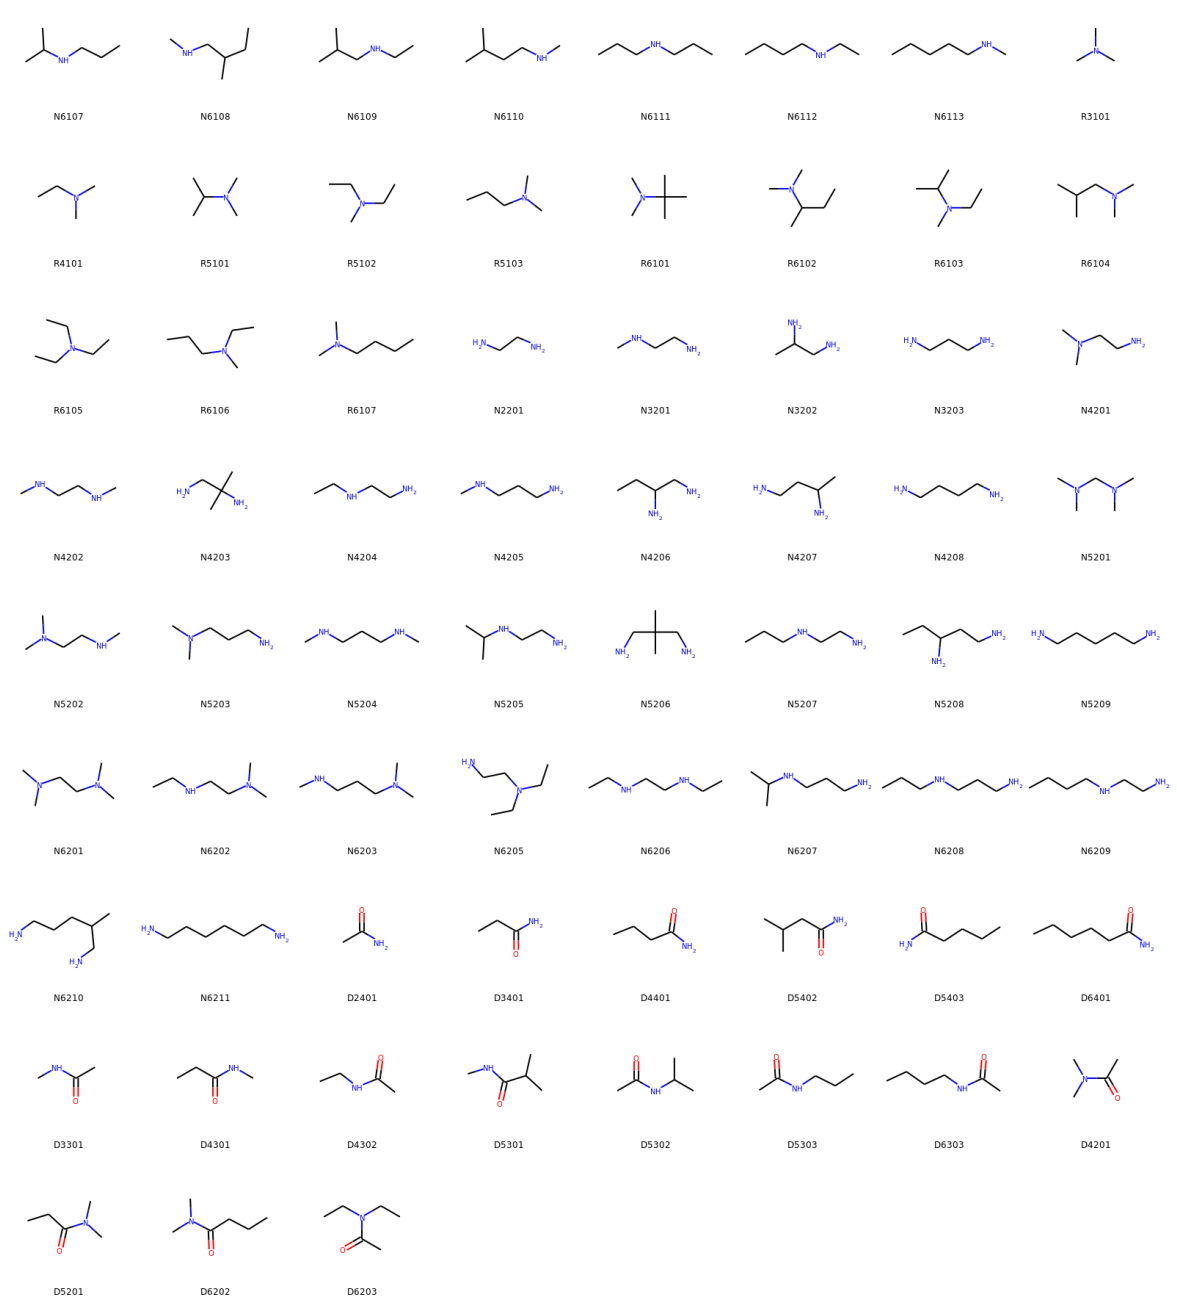

Figure S.2: Structures of the  $N_{\text{iso}}^{\text{val}} = 836$  molecules with 7-10 carbon atoms included in the validation set. See Tab. S.1 for the corresponding names and CAS registry numbers.

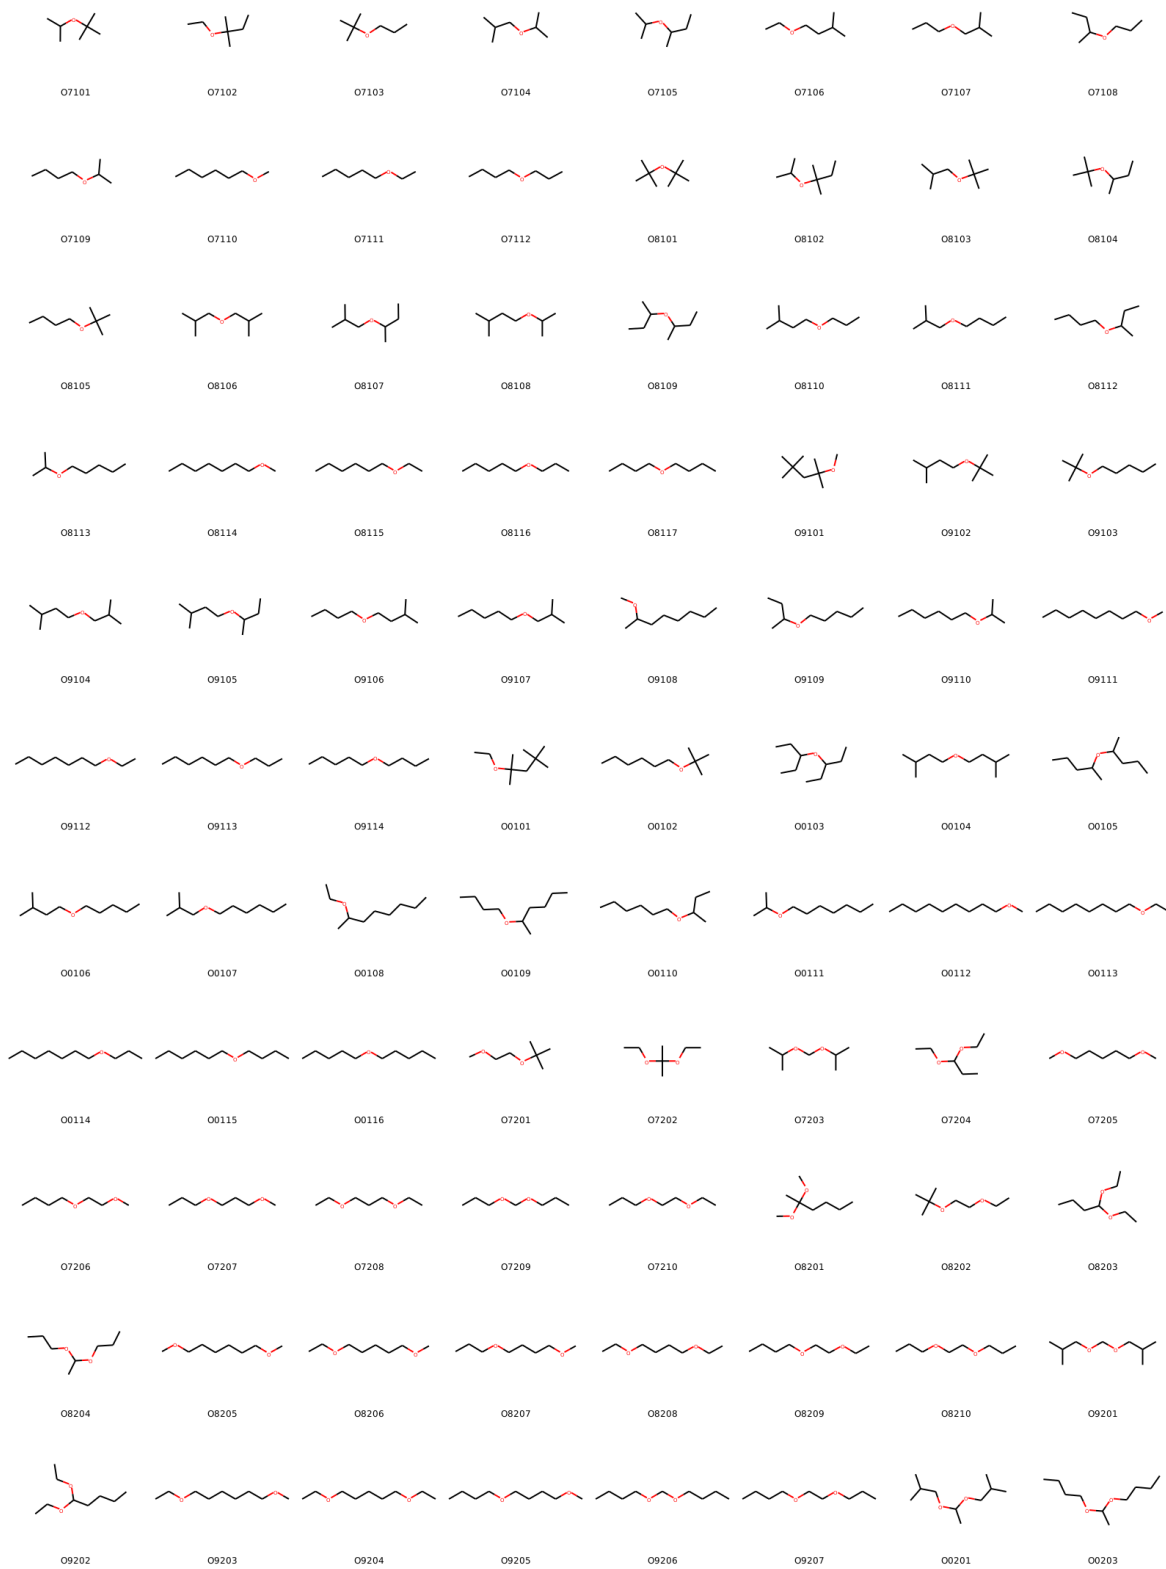

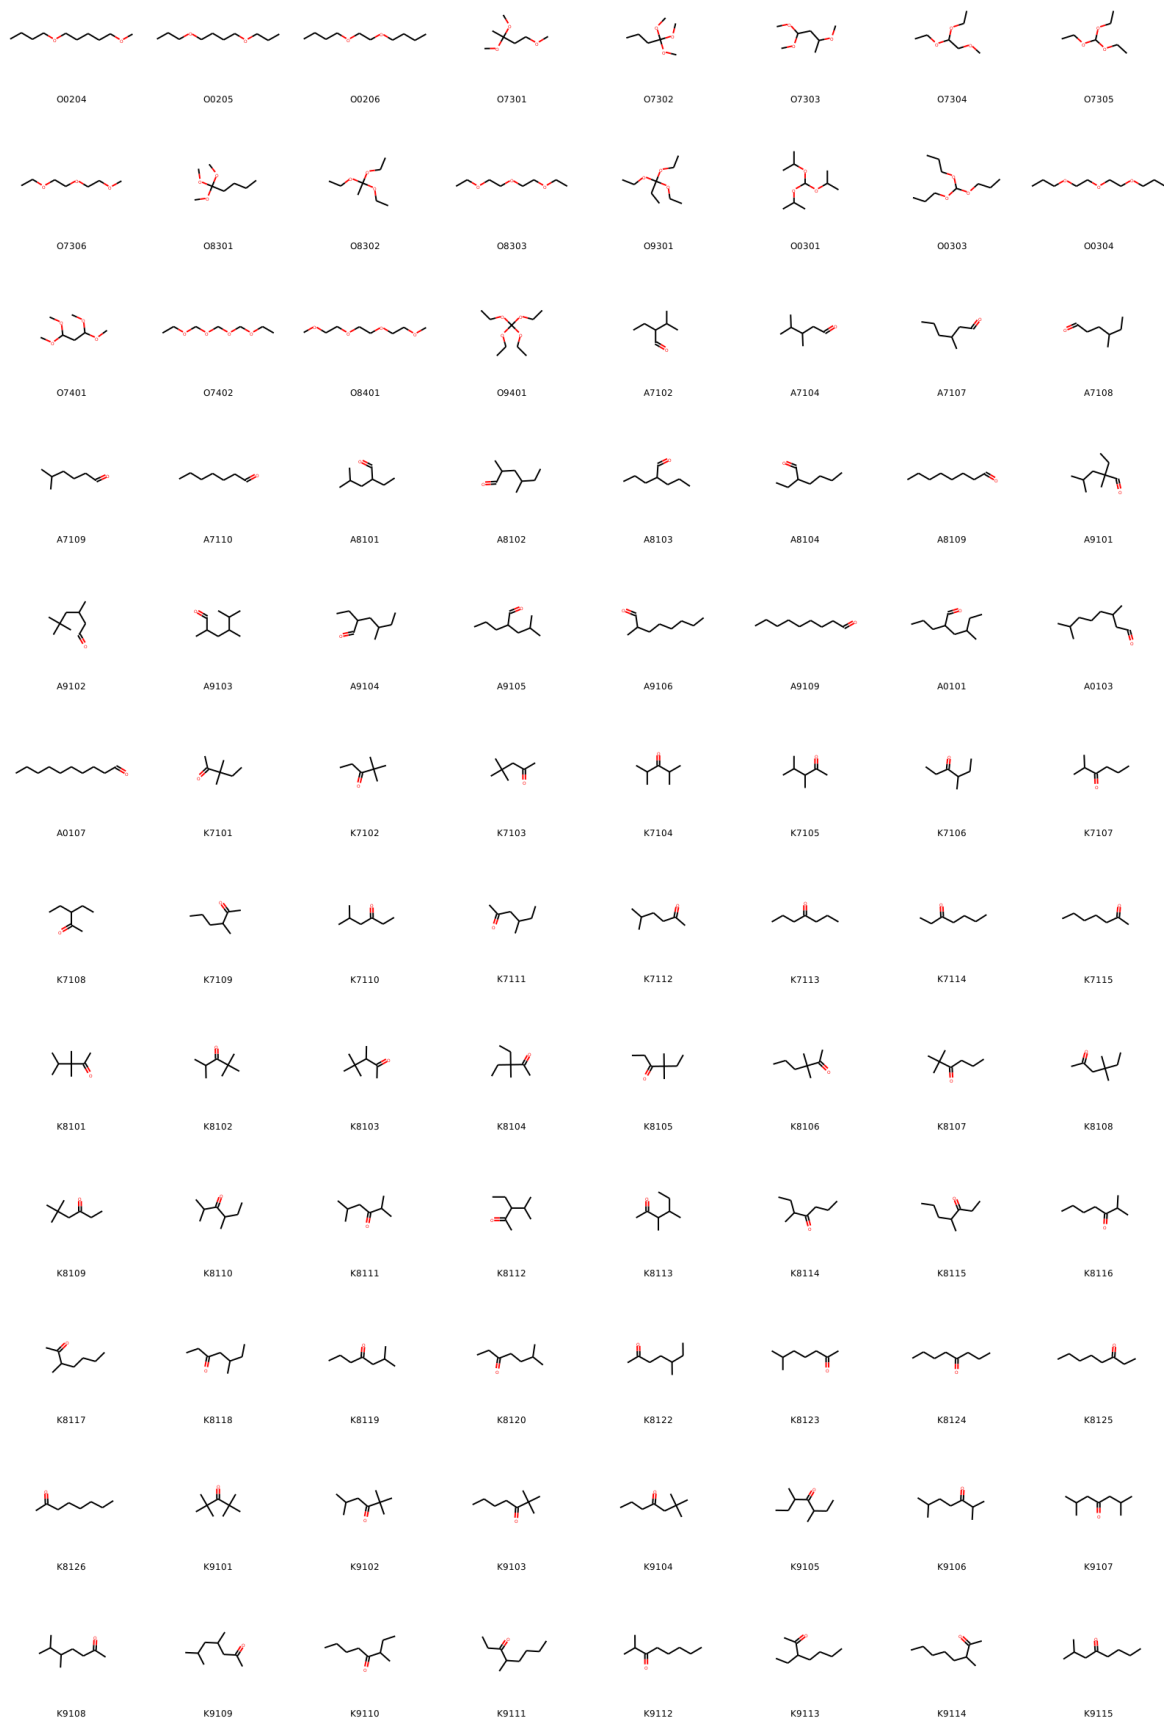

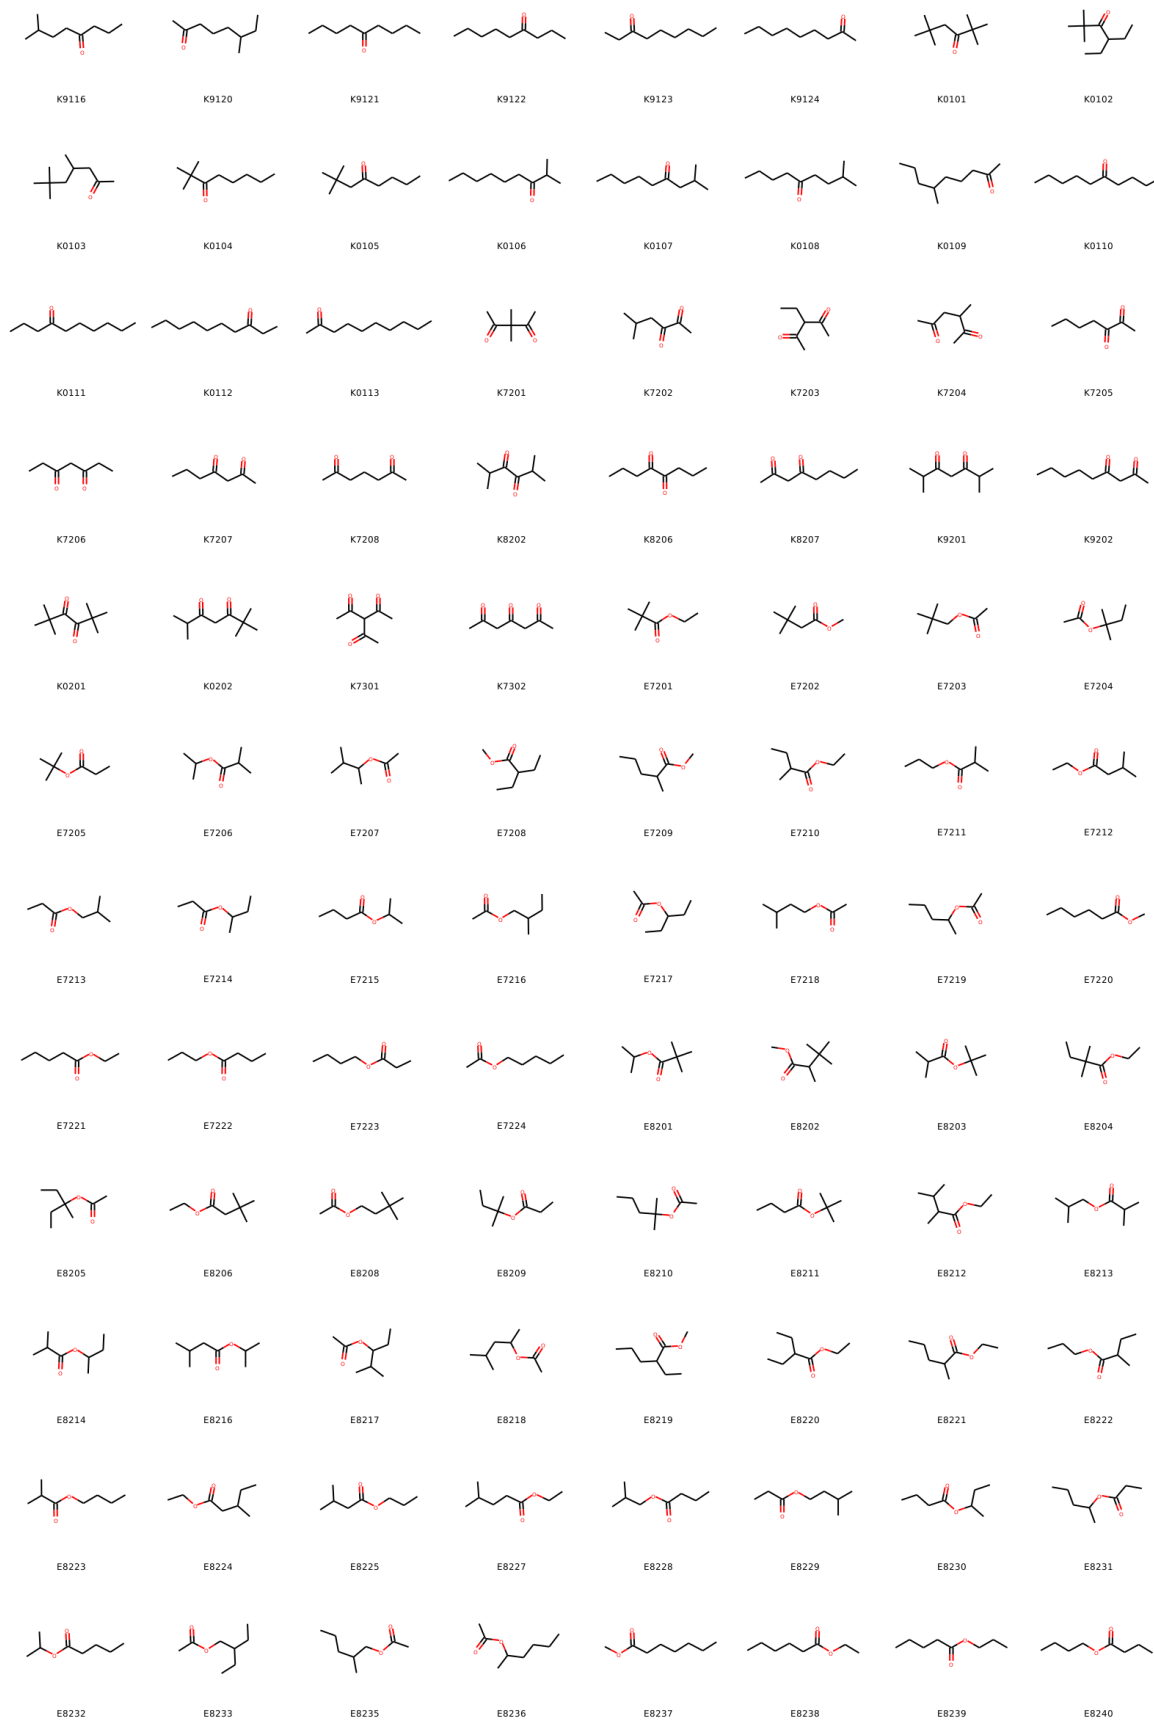



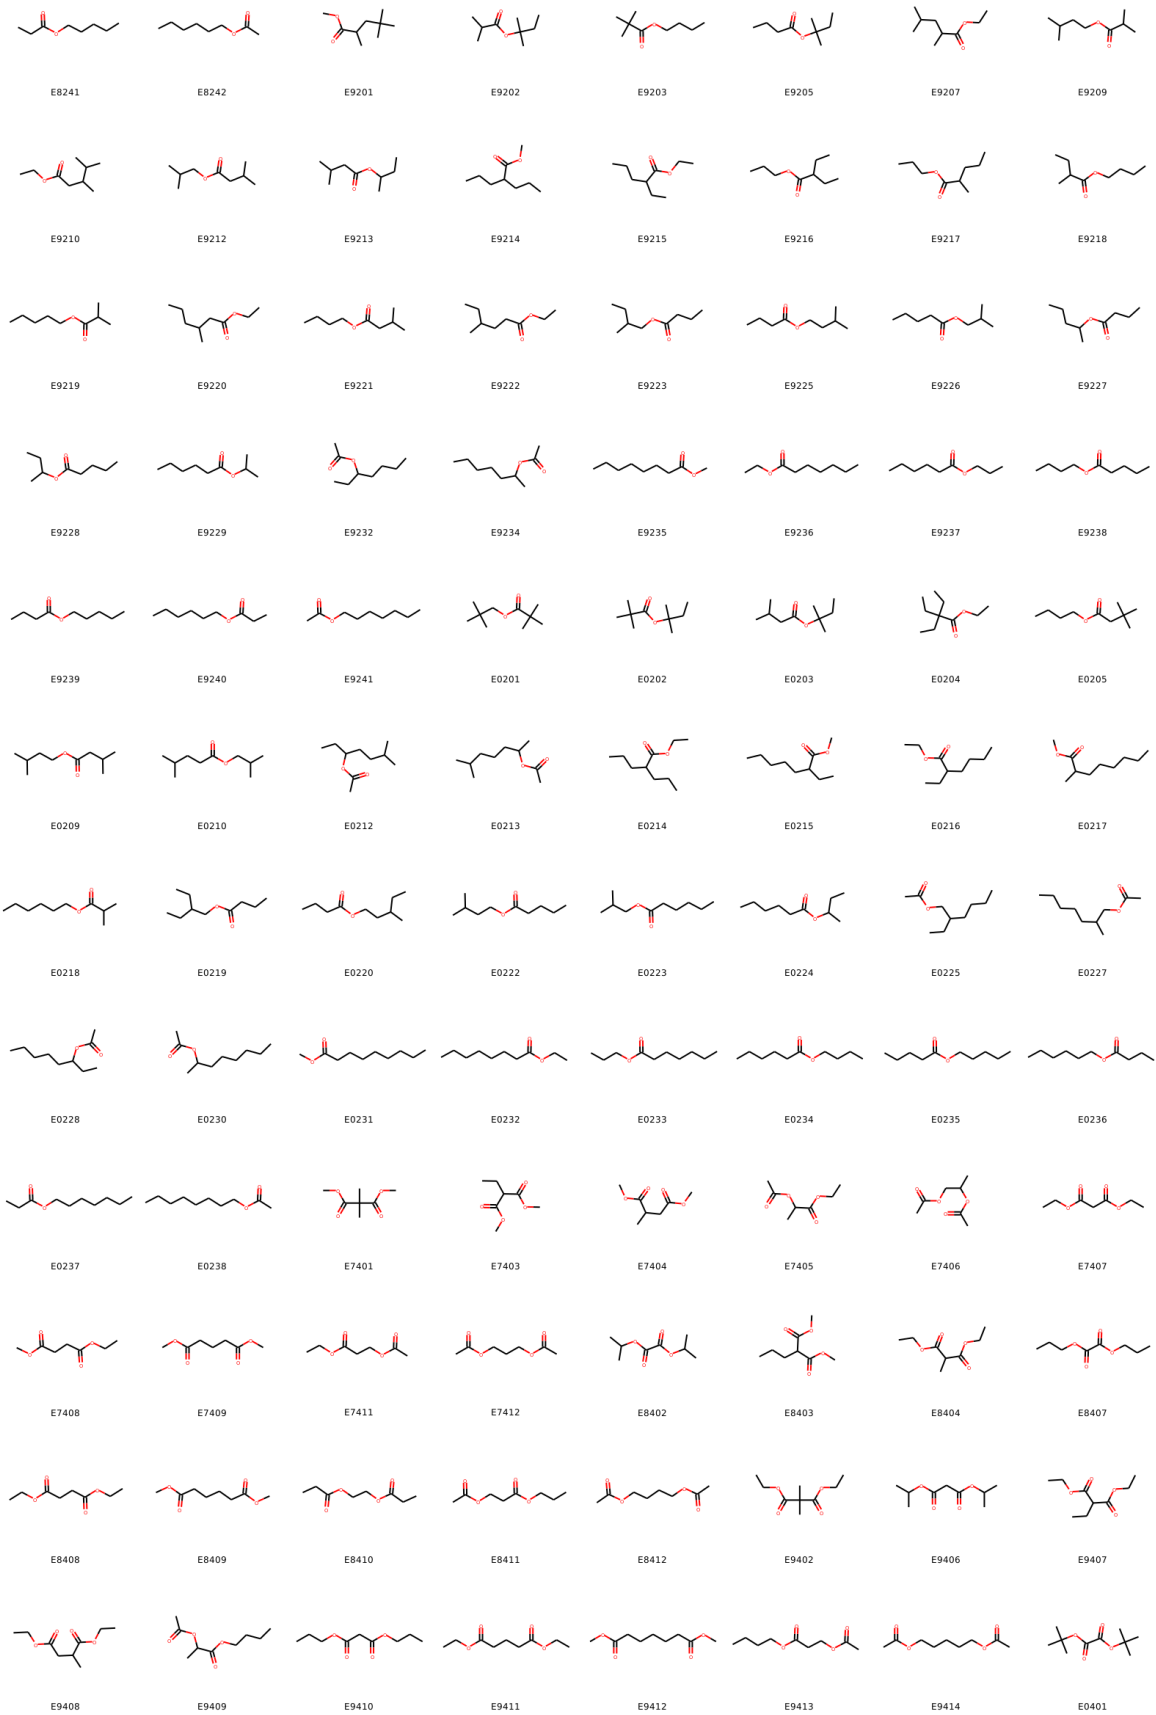

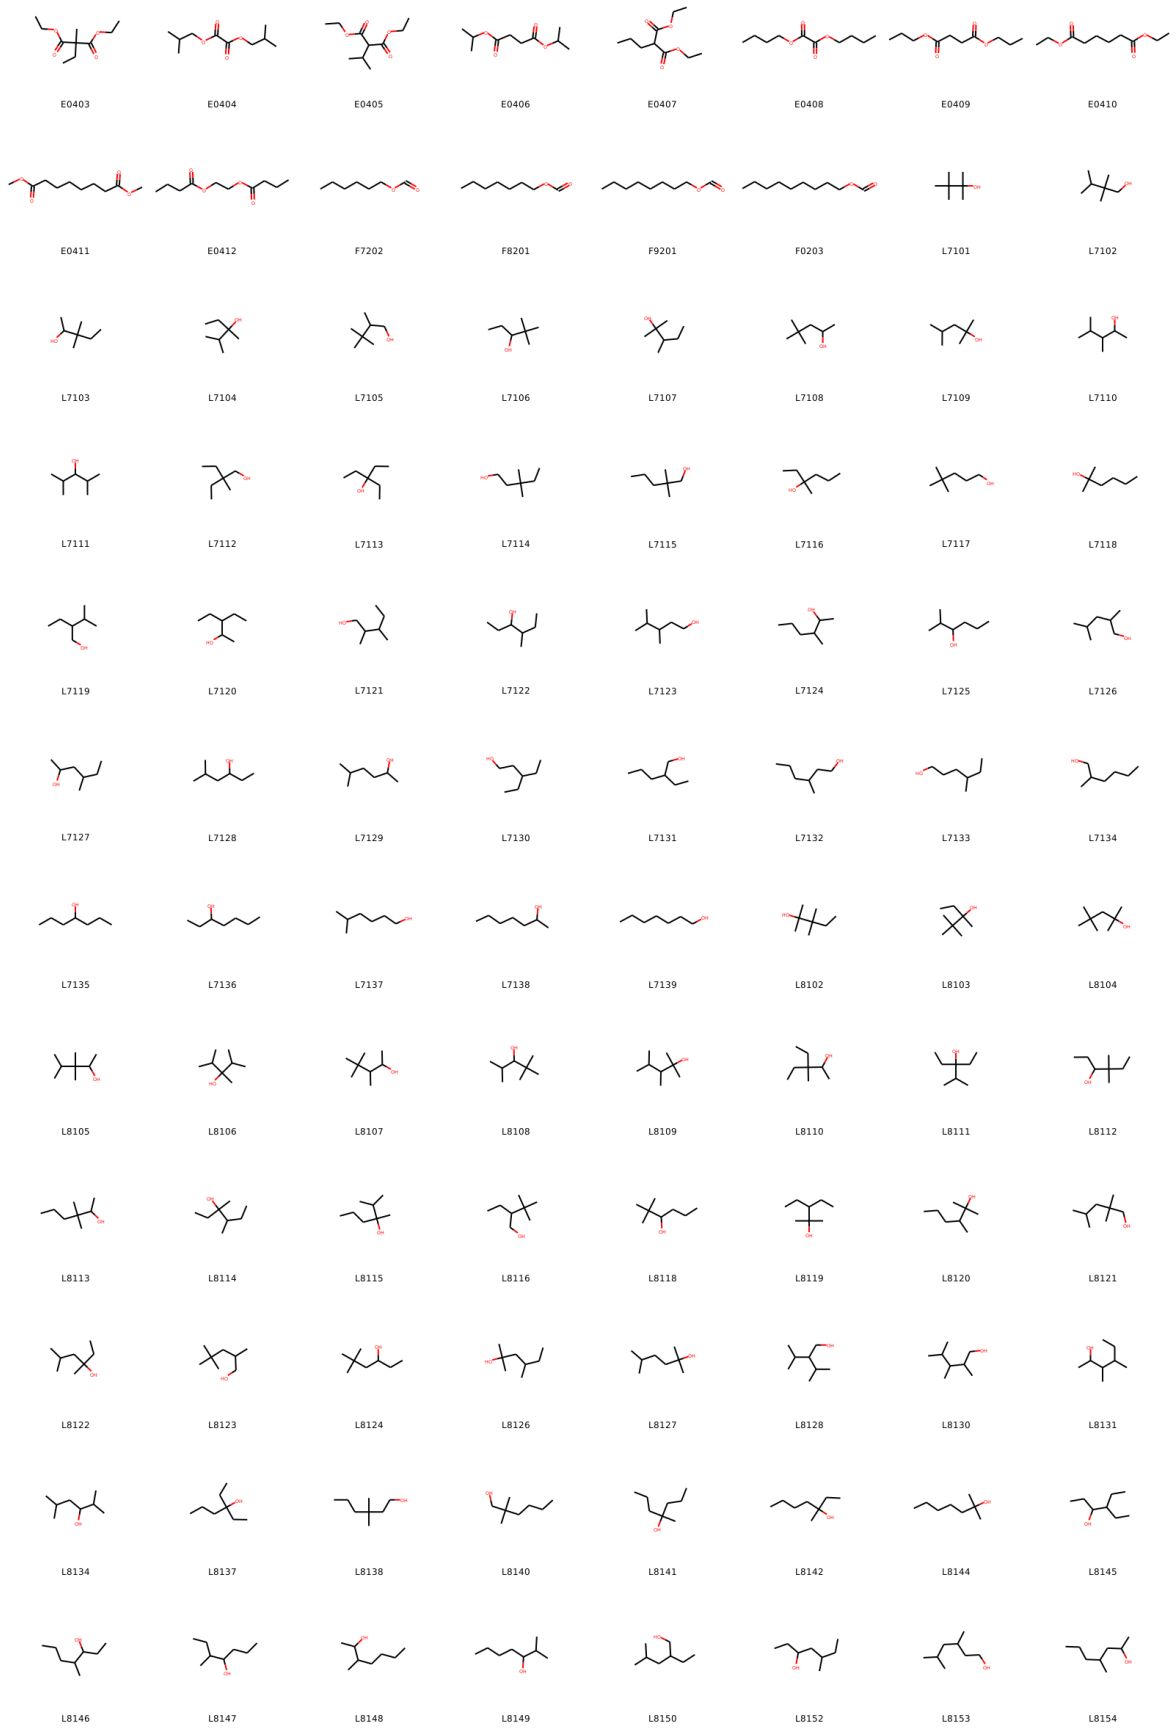

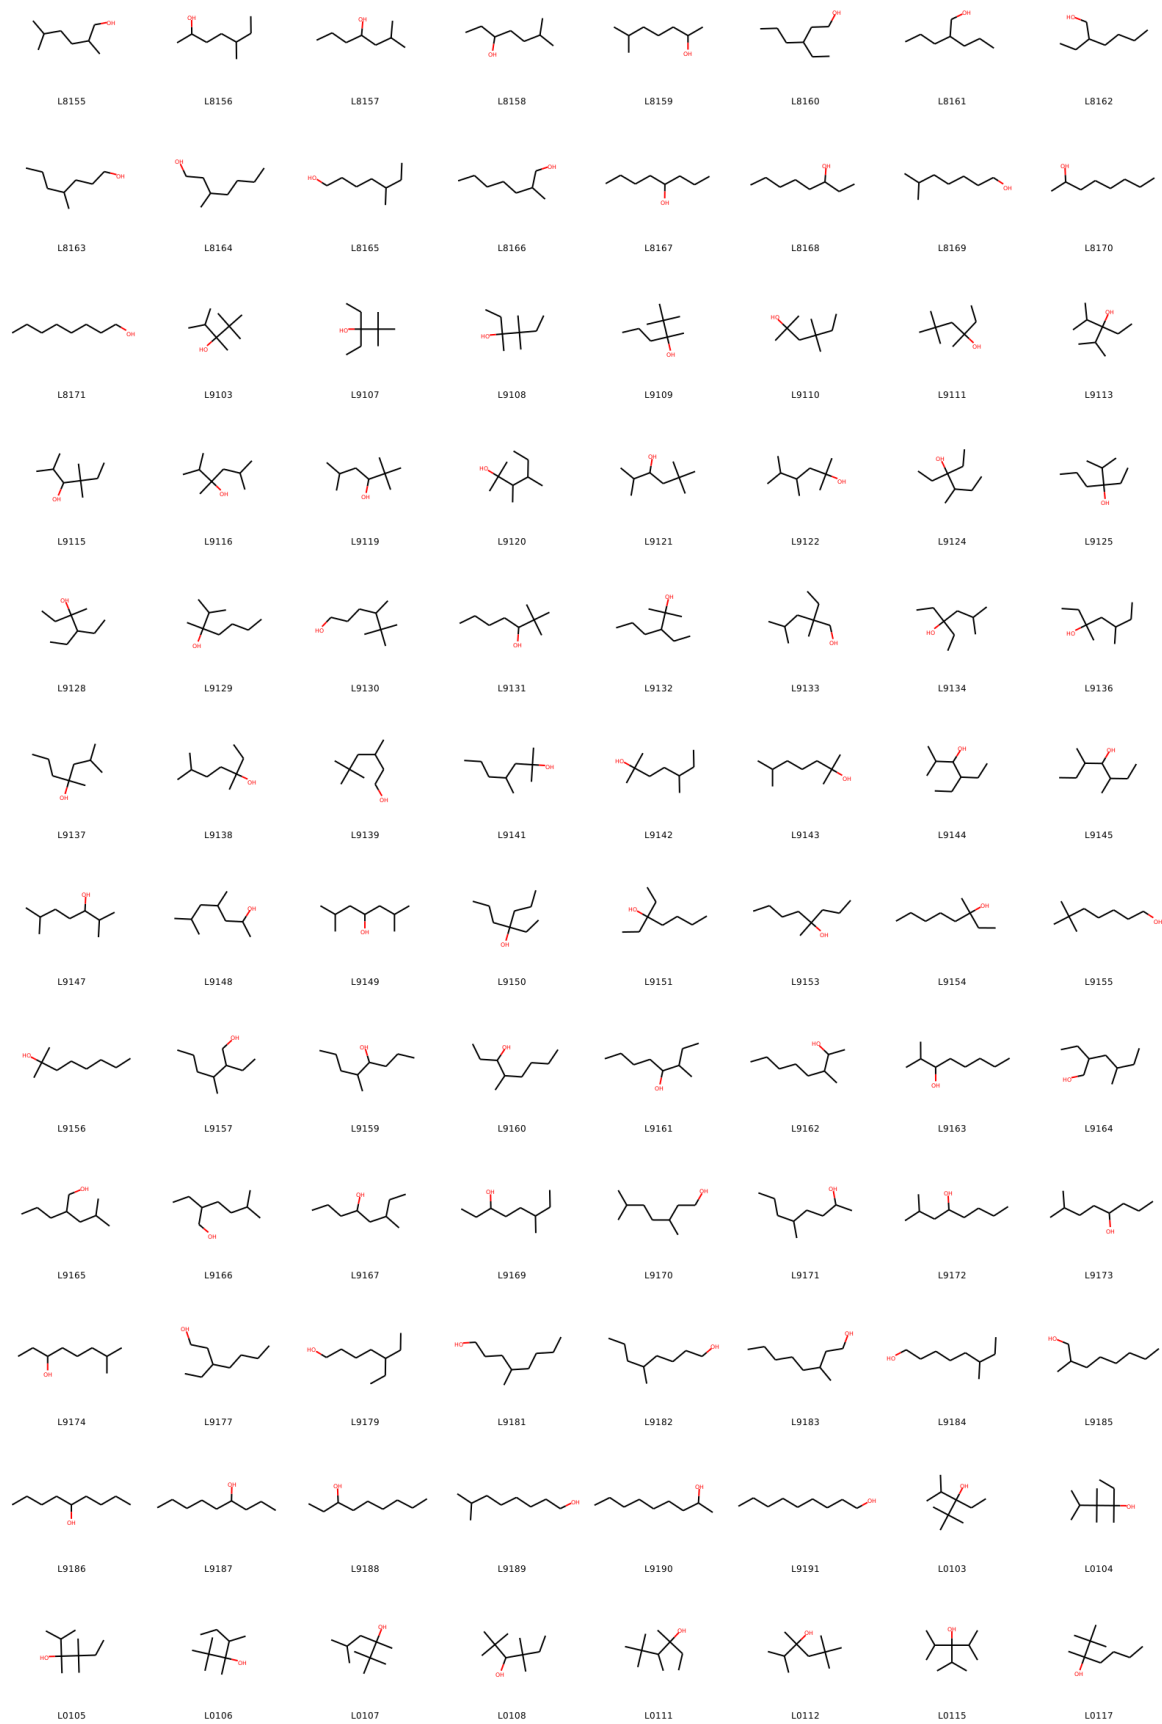

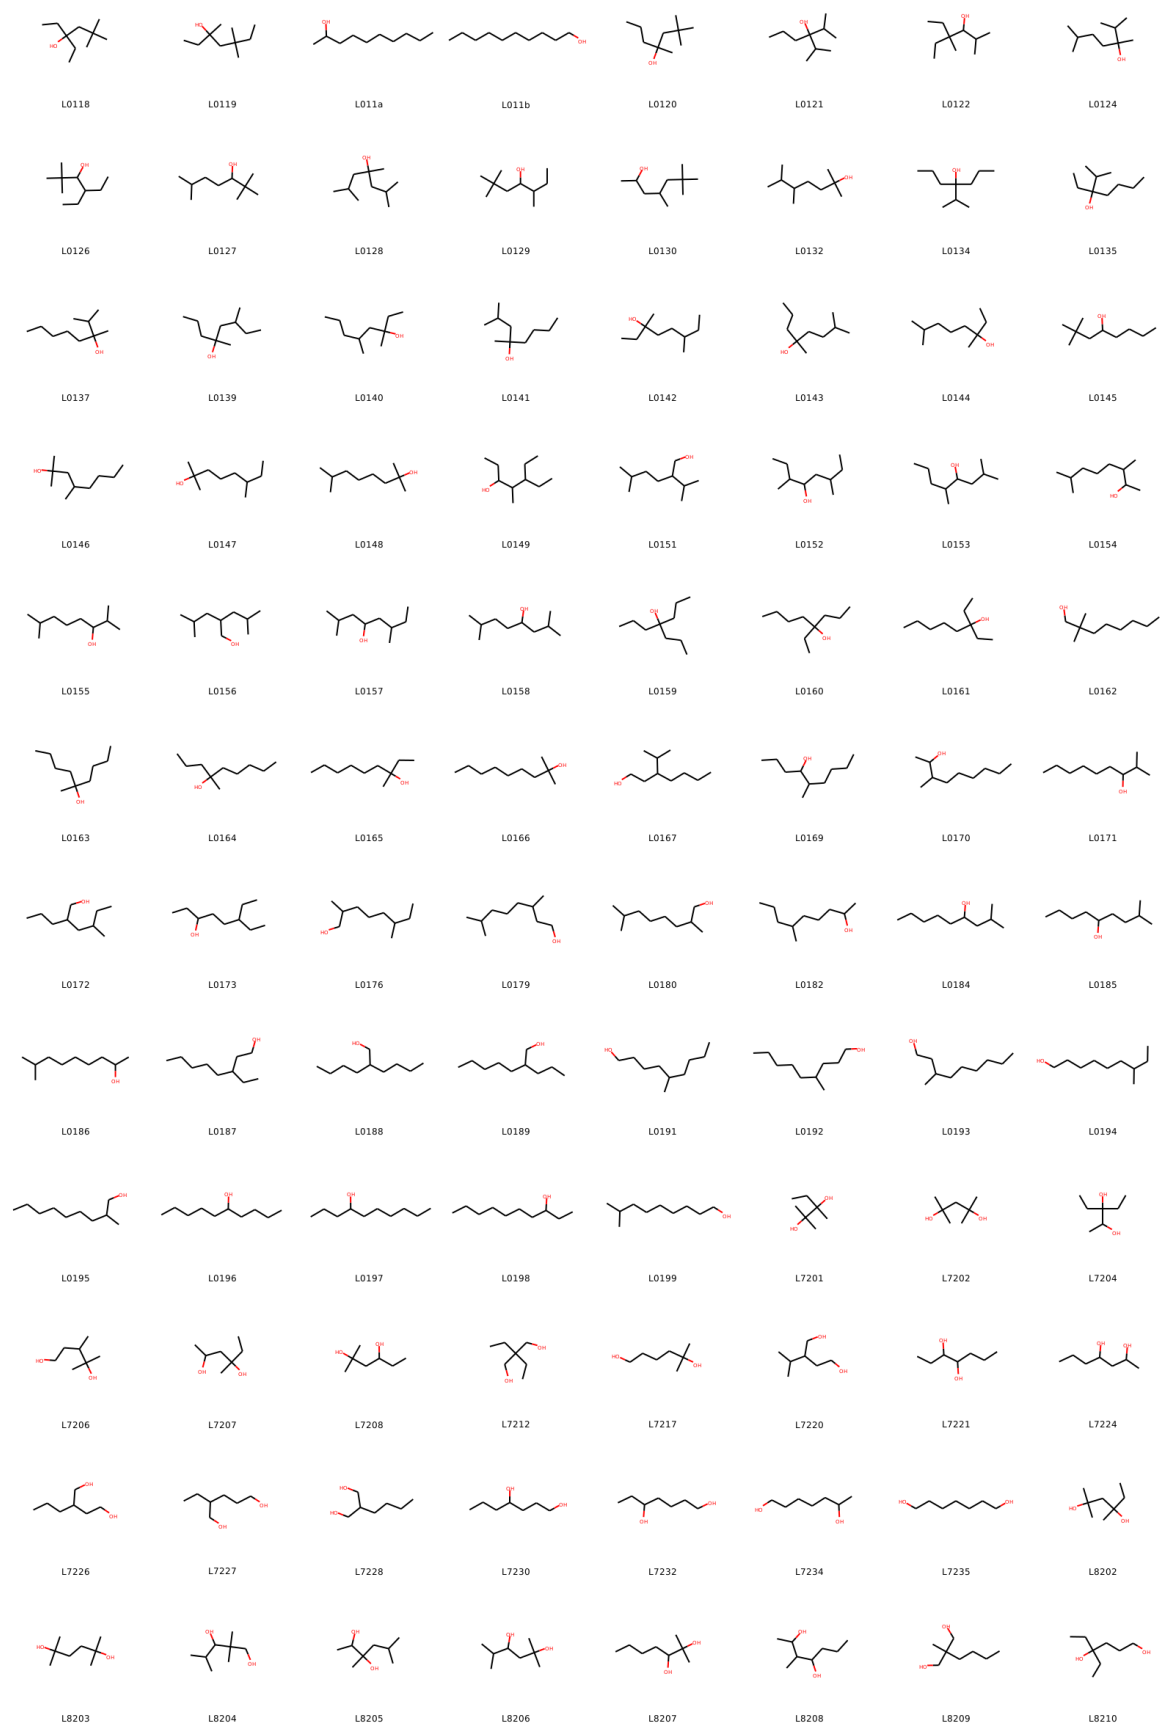

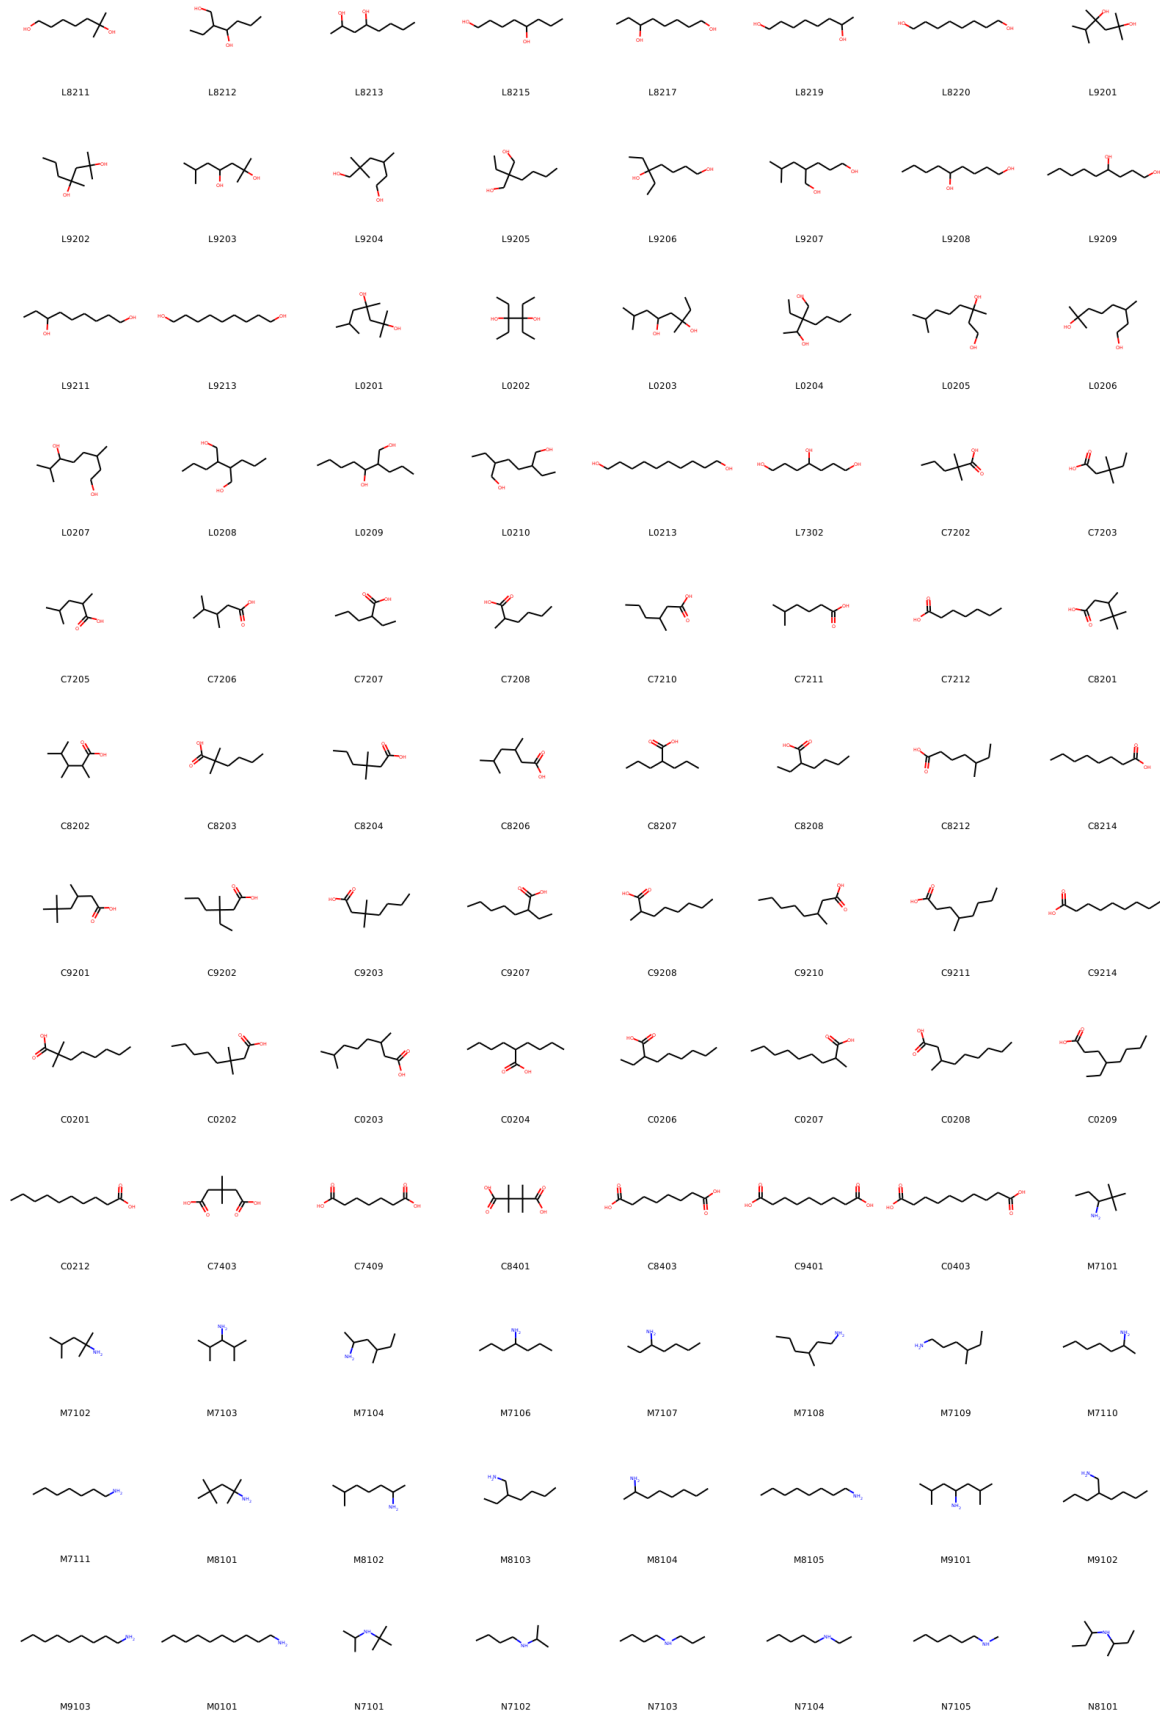

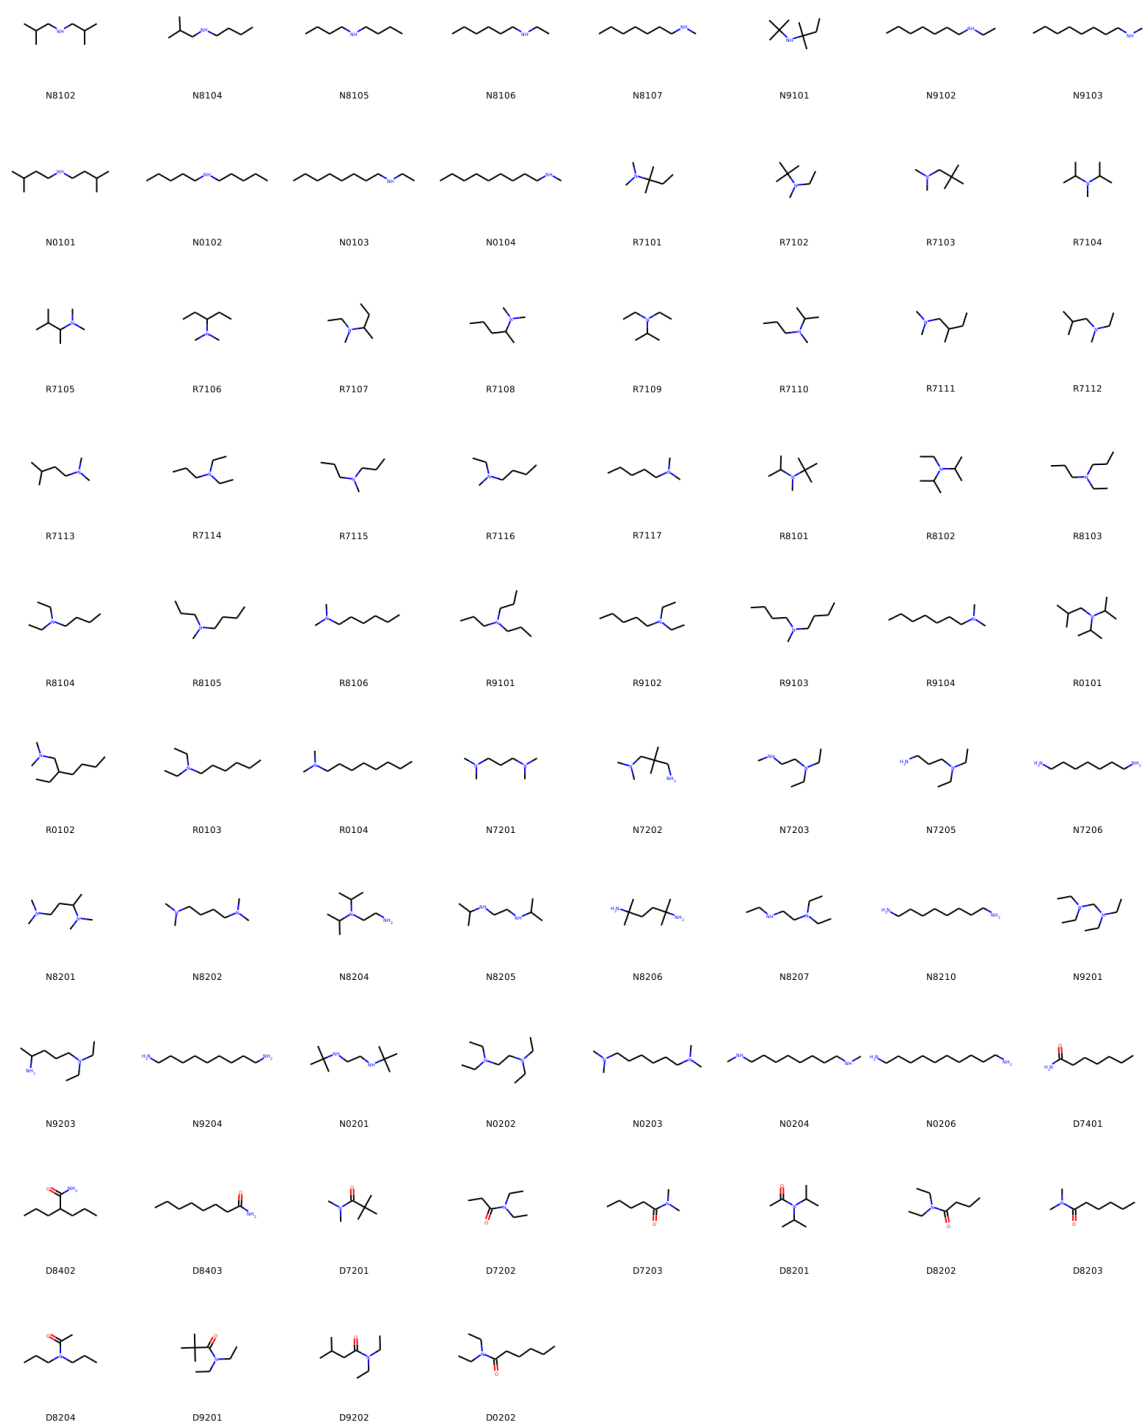

## S.2 Reference Experimental Data

The reference experimental data used in this work is reported in Tab. S.1. The  $N_{\text{iso}}^{\text{sim}} = 1175$  molecules considered are referred to by their code, IUPAC name, CAS registry number, and whether they belong to the calibration (C) or validation (V) set. The structures of the compounds in these two sets are displayed in Figs. S.1 and S.2, respectively. For these molecules, simulations are performed at  $N_{\text{sim}}^{\text{tot}} = 1405$  thermodynamic state points, with indicated pressure  $P$  and temperature  $T$ . Simulations of the same compound performed at different  $P, T$ -points are distinguished by an extra letter (a, b or c) appended to the molecule code. The quantities reported along with a literature source (Src) are the pure-liquid density  $\rho_{\text{liq}}$ , the vaporization enthalpy  $\Delta H_{\text{vap}}$ , the melting point  $T_m$  and the boiling point  $T_b$  at  $P^\circ = 1$  bar, the critical point  $T_c$  (pressure  $P_c$  unspecified), and the static relative dielectric permittivity  $\epsilon$ . For  $\epsilon$ , the column with the source contains either the experimental source or a dash to indicate an educated guess. In the latter case, the  $\epsilon$  value is reported between parentheses.

Table S.1: Reference experimental data pertaining to the  $N_{\text{iso}}^{\text{sim}} = 1175$  molecules (running index  $n_{\text{iso}}$ ) and  $N_{\text{sim}}^{\text{tot}} = 1405$   $P, T$ -points (running index  $n_{\text{sim}}$ ) considered in the simulations.

| $n_{\text{sim}}$ | $n_{\text{iso}}$ | Set | Code   | Name                          | CAS        | $P$<br>[bar] | $T$<br>[K] | $\rho_{\text{liq}}$<br>[kg·m <sup>-3</sup> ] | Src | $\Delta H_{\text{vap}}$<br>[kJ·mol <sup>-1</sup> ] | Src | $T_m$<br>[K] | Src | $T_b$<br>[K] | Src | $T_c$<br>[K] | Src | $\epsilon$ | Src |
|------------------|------------------|-----|--------|-------------------------------|------------|--------------|------------|----------------------------------------------|-----|----------------------------------------------------|-----|--------------|-----|--------------|-----|--------------|-----|------------|-----|
| 1                | 1                | C   | O2101a | methoxymethane                | 115-10-6   | 1.0          | 248.12     | 735.04                                       | 118 | 21.56                                              | 121 | 131.66       | 120 | 248.31       | 121 | 400.10       | 121 | 6.18       | 120 |
| 2                | 1                | C   | O2101b | methoxymethane                | 115-10-6   | 9.06         | 298.28     | 661.92                                       | 118 | -                                                  | -   | 131.66       | 120 | 248.31       | 121 | 400.10       | 121 | 6.18       | 120 |
| 3                | 1                | C   | O2101c | methoxymethane                | 115-10-6   | 5.77         | 298.15     | -                                            | -   | 17.75                                              | 121 | 131.66       | 120 | 248.31       | 121 | 400.10       | 121 | 6.18       | 120 |
| 4                | 2                | C   | O3101a | methoxyethane                 | 540-67-0   | 1.0          | 273.15     | 726.00                                       | 116 | -                                                  | -   | 160.15       | 120 | 280.50       | 121 | 437.80       | 121 | (3.76)     | -   |
| 5                | 2                | C   | O3101b | methoxyethane                 | 540-67-0   | 1.82         | 298.15     | 691.94                                       | 121 | -                                                  | -   | 160.15       | 120 | 280.50       | 121 | 437.80       | 121 | (3.76)     | -   |
| 6                | 2                | C   | O3101c | methoxyethane                 | 540-67-0   | 1.0          | 280.5      | -                                            | -   | 31.22                                              | 121 | 160.15       | 120 | 280.50       | 121 | 437.80       | 121 | (3.76)     | -   |
| 7                | 3                | C   | O4101a | 2-methoxypropane              | 598-53-8   | 1.0          | 298.15     | 708.95                                       | 116 | 26.40                                              | 114 | -            | -   | 303.92       | 121 | 464.48       | 121 | (4.27)     | -   |
| 8                | 4                | C   | O4102a | 1-methoxypropane              | 557-17-5   | 1.0          | 298.15     | 719.22                                       | 116 | 27.90                                              | 114 | -            | -   | 311.72       | 121 | 476.25       | 121 | (4.27)     | -   |
| 9                | 5                | C   | O4103a | ethoxyethane                  | 60-29-7    | 1.0          | 298.15     | 707.82                                       | 116 | 27.20                                              | 114 | 156.93       | 120 | 307.58       | 121 | 466.70       | 121 | 4.2666     | 120 |
| 10               | 6                | C   | O5101a | 2-methoxy-2-methylpropane     | 1634-04-4  | 1.0          | 298.15     | 735.22                                       | 116 | 30.40                                              | 114 | 164.55       | 120 | 328.35       | 121 | 497.10       | 121 | (3.76)     | -   |
| 11               | 7                | C   | O5102a | 1-methoxy-2-methylpropane     | 625-44-5   | 1.0          | 298.15     | 727.20                                       | 116 | -                                                  | -   | -            | -   | 331.70       | 121 | 499.99       | 121 | (3.76)     | -   |
| 12               | 7                | C   | O5102b | 1-methoxy-2-methylpropane     | 625-44-5   | 0.26         | 298.15     | -                                            | -   | 30.13                                              | 121 | -            | -   | 331.70       | 121 | 499.99       | 121 | (3.76)     | -   |
| 13               | 8                | C   | O5103a | 2-methoxybutane               | 6795-87-5  | 1.0          | 298.15     | 736.70                                       | 116 | -                                                  | -   | -            | -   | 332.15       | 121 | 499.99       | 121 | (3.76)     | -   |
| 14               | 8                | C   | O5103b | 2-methoxybutane               | 6795-87-5  | 0.26         | 298.15     | -                                            | -   | 30.21                                              | 121 | -            | -   | 332.15       | 121 | 499.99       | 121 | (3.76)     | -   |
| 15               | 9                | C   | O5104a | 2-ethoxypropane               | 625-54-7   | 1.0          | 298.15     | 717.30                                       | 116 | 30.00                                              | 114 | -            | -   | 326.15       | 121 | 499.99       | 121 | (3.76)     | -   |
| 16               | 10               | C   | O5105a | 1-methoxybutane               | 628-28-4   | 1.0          | 298.15     | 739.40                                       | 116 | 32.50                                              | 114 | 157.45       | 120 | 343.35       | 121 | 512.74       | 121 | (3.76)     | -   |
| 17               | 11               | C   | O5106a | 1-ethoxypropane               | 628-32-0   | 1.0          | 298.15     | 727.00                                       | 116 | 31.40                                              | 114 | 145.65       | 120 | 337.01       | 121 | 500.23       | 121 | (3.76)     | -   |
| 18               | 12               | C   | O6101a | 1-methoxy-2,2-dimethylpropane | 1118-00-9  | 0.08         | 298.15     | 753.94                                       | 121 | -                                                  | -   | -            | -   | 356.15       | 121 | 526.03       | 121 | (3.59)     | -   |
| 19               | 13               | C   | O6102a | 2-methoxy-2-methylbutane      | 994-05-8   | 1.0          | 298.15     | 765.90                                       | 116 | 35.00                                              | 114 | -            | -   | 359.45       | 121 | 526.03       | 121 | (3.59)     | -   |
| 20               | 14               | C   | O6103a | 2-ethoxy-2-methylpropane      | 637-92-3   | 1.0          | 298.15     | 735.16                                       | 116 | 33.10                                              | 114 | 179.15       | 120 | 345.95       | 121 | 526.03       | 121 | (3.59)     | -   |
| 21               | 15               | C   | O6104a | 2-methoxy-3-methylbutane      | 62016-49-3 | 1.0          | 298.15     | 754.20                                       | 116 | -                                                  | -   | -            | -   | 356.15       | 121 | 526.03       | 121 | (3.59)     | -   |
| 22               | 16               | C   | O6105a | 2-propan-2-yloxypropane       | 108-20-3   | 1.0          | 298.15     | 718.70                                       | 116 | 32.70                                              | 114 | 187.78       | 120 | 341.45       | 121 | 500.05       | 121 | 3.805      | 120 |
| 23               | 17               | C   | O6106a | 1-methoxy-2-methylbutane      | 62016-48-2 | 0.07         | 298.15     | 746.09                                       | 121 | -                                                  | -   | -            | -   | 363.15       | 121 | 526.03       | 121 | (3.59)     | -   |
| 24               | 18               | C   | O6107a | 3-methoxypentane              | 36839-67-5 | 0.07         | 298.15     | 748.95                                       | 121 | -                                                  | -   | -            | -   | 361.15       | 121 | 526.03       | 121 | (3.59)     | -   |
| 25               | 19               | C   | O6108a | 1-methoxy-3-methylbutane      | 626-91-5   | 1.0          | 298.15     | 749.05                                       | 116 | -                                                  | -   | -            | -   | 363.15       | 121 | 526.03       | 121 | (3.59)     | -   |
| 26               | 19               | C   | O6108b | 1-methoxy-3-methylbutane      | 626-91-5   | 0.07         | 298.15     | -                                            | -   | 35.54                                              | 121 | -            | -   | 363.15       | 121 | 526.03       | 121 | (3.59)     | -   |
| 27               | 20               | C   | O6109a | 1-ethoxy-2-methylpropane      | 627-02-1   | 1.0          | 298.15     | 734.03                                       | 116 | -                                                  | -   | -            | -   | 354.25       | 121 | 526.03       | 121 | (3.59)     | -   |
| 28               | 20               | C   | O6109b | 1-ethoxy-2-methylpropane      | 627-02-1   | 0.1          | 298.15     | -                                            | -   | 33.62                                              | 121 | -            | -   | 354.25       | 121 | 526.03       | 121 | (3.59)     | -   |
| 29               | 21               | C   | O6110a | 2-methoxypentane              | 6795-88-6  | 0.06         | 298.15     | 749.89                                       | 121 | 35.61                                              | 121 | -            | -   | 364.15       | 121 | 526.03       | 121 | (3.59)     | -   |
| 30               | 22               | C   | O6111a | 2-ethoxybutane                | 2679-87-0  | 1.0          | 298.15     | 738.30                                       | 116 | -                                                  | -   | -            | -   | 354.35       | 121 | 526.03       | 121 | (3.59)     | -   |
| 31               | 22               | C   | O6111b | 2-ethoxybutane                | 2679-87-0  | 0.11         | 298.15     | -                                            | -   | 32.63                                              | 121 | -            | -   | 354.35       | 121 | 526.03       | 121 | (3.59)     | -   |
| 32               | 23               | C   | O6112a | 1-propan-2-yloxypropane       | 627-08-7   | 1.0          | 298.15     | 732.40                                       | 116 | -                                                  | -   | -            | -   | 353.15       | 121 | 526.03       | 121 | (3.59)     | -   |
| 33               | 23               | C   | O6112b | 1-propan-2-yloxypropane       | 627-08-7   | 0.09         | 298.15     | -                                            | -   | 33.98                                              | 121 | -            | -   | 353.15       | 121 | 526.03       | 121 | (3.59)     | -   |
| 34               | 24               | C   | O6113a | 1-methoxypentane              | 628-80-8   | 1.0          | 298.15     | 755.20                                       | 116 | -                                                  | -   | -            | -   | 372.15       | 121 | 546.49       | 121 | (3.59)     | -   |
| 35               | 24               | C   | O6113b | 1-methoxypentane              | 628-80-8   | 0.04         | 298.15     | -                                            | -   | 36.44                                              | 121 | -            | -   | 372.15       | 121 | 546.49       | 121 | (3.59)     | -   |
| 36               | 25               | C   | O6114a | 1-ethoxybutane                | 628-81-9   | 1.0          | 298.15     | 744.70                                       | 116 | 36.30                                              | 114 | 149.15       | 120 | 365.35       | 121 | 526.03       | 121 | (3.59)     | -   |
| 37               | 26               | C   | O6115a | 1-propoxypropane              | 111-43-3   | 1.0          | 298.15     | 741.94                                       | 116 | 35.70                                              | 114 | 158.35       | 120 | 362.79       | 121 | 530.60       | 121 | 3.38       | 120 |
| 38               | 27               | C   | O3201a | dimethoxymethane              | 109-87-5   | 0.51         | 298.15     | 854.12                                       | 121 | -                                                  | -   | 168.04       | 120 | 315.00       | 121 | 480.60       | 121 | 2.644      | 120 |
| 39               | 27               | C   | O3201b | dimethoxymethane              | 109-87-5   | 1.0          | 298.0      | -                                            | -   | 28.90                                              | 114 | 168.04       | 120 | 315.00       | 121 | 480.60       | 121 | 2.644      | 120 |
| 40               | 28               | C   | O4201a | 1,1-dimethoxyethane           | 534-15-6   | 1.0          | 293.15     | 851.60                                       | 116 | 36.40                                              | 114 | 159.95       | 120 | 337.65       | 121 | -            | -   | (7.30)     | -   |
| 41               | 29               | C   | O4202a | 1,2-dimethoxyethane           | 110-71-4   | 1.01         | 298.15     | 861.36                                       | 118 | 36.80                                              | 114 | 204.15       | 120 | 357.20       | 121 | 536.15       | 121 | 7.30       | 120 |
| 42               | 30               | C   | O5201a | 2,2-dimethoxypropane          | 777-76-9   | 1.01         | 298.15     | 845.09                                       | 118 | 37.60                                              | 114 | 226.15       | 120 | 356.15       | 121 | -            | -   | (2.53)     | -   |
| 43               | 31               | C   | O5202a | 1,2-dimethoxypropane          | 7778-85-0  | 1.0          | 369.05     | -                                            | -   | 31.46                                              | 121 | -            | -   | 369.05       | 121 | -            | -   | (2.53)     | -   |
| 44               | 32               | C   | O5203a | 1,1-dimethoxypropane          | 4744-10-9  | 1.0          | 293.15     | 864.80                                       | 120 | -                                                  | -   | -            | -   | 359.15       | 121 | -            | -   | (2.53)     | -   |
| 45               | 32               | C   | O5203b | 1,1-dimethoxypropane          | 4744-10-9  | 1.0          | 359.15     | -                                            | -   | 30.53                                              | 121 | -            | -   | 359.15       | 121 | -            | -   | (2.53)     | -   |



Table S.1 – Reference experimental data (continued)

| $n_{sim}$ | $n_{iso}$ | Set | Code   | Name                                | CAS         | $P$   | $T$    | $\rho_{liq}$          | Src | $\Delta H_{vap}$        | Src | $T_m$  | Src | $T_b$  | Src | $T_c$  | Src | $\epsilon$ | Src |
|-----------|-----------|-----|--------|-------------------------------------|-------------|-------|--------|-----------------------|-----|-------------------------|-----|--------|-----|--------|-----|--------|-----|------------|-----|
|           |           |     |        |                                     |             | [bar] | [K]    | [kg·m <sup>-3</sup> ] |     | [kJ·mol <sup>-1</sup> ] |     | [K]    |     | [K]    |     | [K]    |     |            |     |
| 46        | 33        | C   | O5204a | 1-ethoxy-2-methoxyethane            | 500005-27-6 | 1.0   | 298.15 | 846.00                | 120 | 39.80                   | 114 | -      | -   | 375.25 | 121 | -      | -   | (2.53)     | -   |
| 47        | 34        | C   | O5205a | ethoxymethoxyethane                 | 462-95-3    | 1.0   | 298.15 | 825.17                | 116 | 35.70                   | 114 | 207.15 | 120 | 361.15 | 121 | 524.00 | 121 | 2.527      | 120 |
| 48        | 35        | C   | O6201a | 1,1-dimethoxy-2-methylpropane       | 41632-89-7  | 1.0   | 293.15 | 844.60                | 116 | -                       | -   | -      | -   | -      | -   | -      | -   | (3.90)     | -   |
| 49        | 36        | C   | O6203a | 1,1-dimethoxybutane                 | 4461-87-4   | 1.0   | 317.0  | -                     | -   | 41.20                   | 114 | -      | -   | -      | -   | -      | -   | (3.90)     | -   |
| 50        | 37        | C   | O6204a | 1,1-diethoxyethane                  | 105-57-7    | 1.01  | 298.15 | 821.96                | 118 | 39.60                   | 114 | 167.05 | 120 | 376.75 | 121 | 539.70 | 121 | (3.90)     | -   |
| 51        | 38        | C   | O6205a | 1,4-dimethoxybutane                 | 13179-96-9  | 1.0   | 298.15 | 852.90                | 116 | -                       | -   | -      | -   | -      | -   | -      | -   | (3.90)     | -   |
| 52        | 39        | C   | O6206a | 1-(methoxymethoxy)butane            | 76050-97-0  | 1.0   | 340.0  | -                     | -   | 38.60                   | 114 | -      | -   | -      | -   | -      | -   | (3.90)     | -   |
| 53        | 40        | C   | O6207a | 1,2-diethoxyethane                  | 629-14-1    | 1.0   | 298.15 | 836.20                | 116 | 43.20                   | 114 | 199.15 | 120 | 392.55 | 121 | 637.84 | 121 | 3.90       | 120 |
| 54        | 41        | C   | O4301a | trimethoxymethane                   | 149-73-5    | 1.0   | 293.15 | 967.60                | 120 | 38.10                   | 114 | 288.15 | 120 | 377.15 | 121 | -      | -   | (6.00)     | -   |
| 55        | 42        | C   | O5301a | 1,1,1-trimethoxyethane              | 1445-45-0   | 1.0   | 298.15 | 943.80                | 120 | -                       | -   | -      | -   | 381.15 | 121 | -      | -   | (6.00)     | -   |
| 56        | 42        | C   | O5301b | 1,1,1-trimethoxyethane              | 1445-45-0   | 1.0   | 381.15 | -                     | -   | 32.59                   | 121 | -      | -   | 381.15 | 121 | -      | -   | (6.00)     | -   |
| 57        | 43        | C   | O6302a | 1,2,3-trimethoxypropane             | 20637-49-4  | 1.0   | 421.15 | -                     | -   | 36.36                   | 121 | -      | -   | 421.15 | 121 | -      | -   | (7.23)     | -   |
| 58        | 44        | C   | O6304a | 1-methoxy-2-(2-methoxyethoxy)ethane | 111-96-6    | 1.0   | 298.15 | 939.24                | 116 | 48.00                   | 114 | 209.15 | 120 | 432.91 | 121 | 608.00 | 121 | 7.23       | 120 |
| 59        | 45        | C   | O5401a | tetramethoxymethane                 | 1850-14-2   | 1.0   | 298.15 | 1023.00               | 120 | -                       | -   | 270.65 | 120 | 387.15 | 121 | -      | -   | 2.40       | 120 |
| 60        | 45        | C   | O5401b | tetramethoxymethane                 | 1850-14-2   | 1.0   | 319.0  | -                     | -   | 41.20                   | 114 | 270.65 | 120 | 387.15 | 121 | -      | -   | 2.40       | 120 |
| 61        | 46        | C   | O6401a | 1,1,2,2-tetramethoxyethane          | 2517-44-4   | 1.0   | 366.0  | -                     | -   | 42.90                   | 114 | -      | -   | -      | -   | -      | -   | (5.01)     | -   |
| 62        | 47        | C   | A1101a | formaldehyde                        | 50-00-0     | 1.36  | 250.68 | 805.17                | 121 | -                       | -   | 181.15 | 120 | 254.05 | 121 | 415.24 | 121 | (2.0)      | -   |
| 63        | 47        | C   | A1101b | formaldehyde                        | 50-00-0     | 1.0   | 293.15 | 814.00                | 117 | -                       | -   | 181.15 | 120 | 254.05 | 121 | 415.24 | 121 | (2.0)      | -   |
| 64        | 47        | C   | A1101c | formaldehyde                        | 50-00-0     | 1.0   | 254.05 | -                     | -   | 23.16                   | 121 | 181.15 | 120 | 254.05 | 121 | 415.24 | 121 | (2.0)      | -   |
| 65        | 48        | C   | A2101a | acetaldehyde                        | 75-07-0     | 1.0   | 298.15 | 772.00                | 117 | 26.90                   | 114 | 149.75 | 120 | 293.55 | 121 | 466.00 | 121 | 21.0       | 120 |
| 66        | 49        | C   | A3101a | propanal                            | 123-38-6    | 1.0   | 298.15 | 791.22                | 117 | 29.60                   | 114 | 193.15 | 120 | 321.15 | 121 | 504.40 | 121 | 18.5       | 120 |
| 67        | 50        | C   | A4101a | 2-methylpropanal                    | 78-84-2     | 1.0   | 298.15 | 796.62                | 117 | 32.30                   | 114 | 201.05 | 120 | 337.25 | 121 | 540.36 | 121 | (13.45)    | -   |
| 68        | 51        | C   | A4102a | butanal                             | 123-72-8    | 1.0   | 298.15 | 796.60                | 117 | 33.70                   | 114 | 176.29 | 120 | 347.95 | 121 | 537.20 | 121 | 13.45      | 120 |
| 69        | 52        | C   | A5101a | 2,2-dimethylpropanal                | 630-19-3    | 0.14  | 298.15 | 783.10                | 121 | -                       | -   | 274.15 | 120 | 347.15 | 121 | 570.01 | 121 | 9.051      | 120 |
| 70        | 52        | C   | A5101b | 2,2-dimethylpropanal                | 630-19-3    | 1.0   | 322.0  | -                     | -   | 34.20                   | 114 | 274.15 | 120 | 347.15 | 121 | 570.01 | 121 | 9.051      | 120 |
| 71        | 53        | C   | A5102a | 2-methylbutanal                     | 96-17-3     | 0.06  | 298.15 | 804.11                | 121 | 34.75                   | 121 | -      | -   | 365.15 | 121 | 570.01 | 121 | (9.53)     | -   |
| 72        | 54        | C   | A5103a | 3-methylbutanal                     | 590-86-3    | 1.0   | 298.15 | 794.21                | 117 | -                       | -   | 222.15 | 120 | 365.75 | 121 | 570.01 | 121 | (9.53)     | -   |
| 73        | 54        | C   | A5103b | 3-methylbutanal                     | 590-86-3    | 0.06  | 298.15 | -                     | -   | 34.82                   | 121 | 222.15 | 120 | 365.75 | 121 | 570.01 | 121 | (9.53)     | -   |
| 74        | 55        | C   | A5104a | pentanal                            | 110-62-3    | 1.0   | 298.15 | 806.23                | 117 | 38.10                   | 114 | 191.65 | 120 | 376.15 | 121 | 566.10 | 121 | 10.00      | 120 |
| 75        | 56        | C   | A6101a | 2,2-dimethylbutanal                 | 2094-75-9   | 0.03  | 298.15 | 801.03                | 121 | 36.21                   | 121 | -      | -   | 377.15 | 121 | 596.45 | 121 | (13.51)    | -   |
| 76        | 57        | C   | A6103a | 2,3-dimethylbutanal                 | 2109-98-0   | 1.0   | 298.15 | 809.70                | 117 | -                       | -   | -      | -   | 386.15 | 121 | 596.45 | 121 | (13.51)    | -   |
| 77        | 58        | C   | A6104a | 2-ethylbutanal                      | 97-96-1     | 0.02  | 298.15 | 814.07                | 121 | 38.61                   | 121 | -      | -   | 389.95 | 121 | 596.45 | 121 | (13.51)    | -   |
| 78        | 59        | C   | A6105a | 2-methylpentanal                    | 123-15-9    | 0.02  | 298.15 | 808.05                | 121 | 38.78                   | 121 | -      | -   | 390.15 | 121 | 596.45 | 121 | (13.51)    | -   |
| 79        | 60        | C   | A6106a | 3-methylpentanal                    | 15877-57-3  | 0.01  | 299.47 | 806.65                | 121 | -                       | -   | -      | -   | 395.15 | 121 | 596.45 | 121 | (13.51)    | -   |
| 80        | 61        | C   | A6108a | hexanal                             | 66-25-1     | 1.01  | 298.15 | 833.12                | 118 | 42.30                   | 114 | 214.95 | 120 | 401.45 | 121 | 591.00 | 121 | (13.51)    | -   |
| 81        | 62        | C   | A4201a | butanedial                          | 638-37-9    | 1.0   | 293.15 | 1065.00               | 120 | -                       | -   | -      | -   | 443.15 | 121 | -      | -   | (9.0)      | -   |
| 82        | 63        | C   | A5201b | pentanedial                         | 111-30-8    | 1.0   | 342.0  | -                     | -   | 56.20                   | 114 | 259.15 | 120 | 461.15 | 121 | 660.00 | 121 | (9.0)      | -   |
| 83        | 64        | C   | A6201a | 3-methylpentanedial                 | 6280-15-5   | 1.0   | 439.15 | -                     | -   | 38.07                   | 121 | -      | -   | 439.15 | 121 | -      | -   | (9.0)      | -   |
| 84        | 65        | C   | A6202a | hexanedial                          | 1072-21-5   | 1.0   | 292.15 | 1003.00               | 120 | -                       | -   | 265.15 | 120 | 435.22 | 121 | -      | -   | (9.0)      | -   |
| 85        | 66        | C   | K3101a | propan-2-one                        | 67-64-1     | 1.0   | 298.15 | 784.37                | 117 | 31.30                   | 114 | 178.25 | 120 | 329.44 | 121 | 508.20 | 121 | 21.01      | 120 |
| 86        | 67        | C   | K4101a | butan-2-one                         | 78-93-3     | 1.0   | 298.15 | 799.91                | 117 | 34.50                   | 114 | 186.48 | 120 | 352.79 | 121 | 535.50 | 121 | 18.56      | 120 |
| 87        | 68        | C   | K5101a | 3-methylbutan-2-one                 | 563-80-4    | 1.0   | 298.15 | 809.36                | 117 | 36.80                   | 114 | 180.02 | 120 | 367.55 | 121 | 553.40 | 121 | 10.37      | 120 |
| 88        | 69        | C   | K5102a | pentan-3-one                        | 96-22-0     | 1.0   | 298.15 | 809.60                | 117 | 38.50                   | 114 | 234.17 | 120 | 375.14 | 121 | 560.90 | 121 | 17.00      | 120 |
| 89        | 70        | C   | K5103a | pentan-2-one                        | 107-87-9    | 1.0   | 298.15 | 801.76                | 117 | 38.30                   | 114 | 196.32 | 120 | 375.46 | 121 | 561.08 | 121 | 15.45      | 120 |
| 90        | 71        | C   | K6101a | 3,3-dimethylbutan-2-one             | 75-97-8     | 1.0   | 298.15 | 804.30                | 117 | 38.30                   | 114 | 221.75 | 120 | 379.25 | 120 | -      | -   | 12.73      | 120 |
| 91        | 72        | C   | K6102a | 2-methylpentan-3-one                | 565-69-5    | 1.0   | 298.15 | 806.60                | 117 | 39.80                   | 114 | -      | -   | 386.55 | 121 | 587.45 | 121 | (13.47)    | -   |
| 92        | 73        | C   | K6103a | 3-methylpentan-2-one                | 565-61-7    | 1.0   | 298.15 | 808.30                | 117 | 39.80                   | 114 | -      | -   | 390.55 | 121 | 587.45 | 121 | (13.47)    | -   |
| 93        | 74        | C   | K6104a | 4-methylpentan-2-one                | 108-10-1    | 1.0   | 298.15 | 796.30                | 117 | 41.00                   | 114 | 188.15 | 120 | 389.65 | 121 | 574.60 | 121 | 13.11      | 120 |

Table S.1 – Reference experimental data (continued)

| $n_{sim}$ | $n_{iso}$ | Set | Code   | Name                           | CAS        | $P$<br>[bar] | $T$<br>[K] | $\rho_{liq}$<br>[kg·m <sup>-3</sup> ] | Src | $\Delta H_{vap}$<br>[kJ·mol <sup>-1</sup> ] | Src | $T_m$<br>[K] | Src | $T_b$<br>[K] | Src | $T_c$<br>[K] | Src | $\epsilon$ | Src |
|-----------|-----------|-----|--------|--------------------------------|------------|--------------|------------|---------------------------------------|-----|---------------------------------------------|-----|--------------|-----|--------------|-----|--------------|-----|------------|-----|
| 94        | 75        | C   | K6105a | hexan-3-one                    | 589-38-8   | 1.0          | 298.15     | 811.10                                | 117 | 40.60                                       | 114 | 217.75       | 120 | 396.65       | 121 | 582.82       | 121 | (13.47)    | -   |
| 95        | 76        | C   | K6106a | hexan-2-one                    | 591-78-6   | 1.0          | 298.15     | 807.14                                | 117 | 42.20                                       | 114 | 217.70       | 120 | 400.85       | 121 | 587.61       | 121 | 14.56      | 120 |
| 96        | 77        | C   | K6201a | 3-methylpentane-2,4-dione      | 815-57-6   | 0.01         | 332.77     | 946.77                                | 121 | 46.75                                       | 121 | -            | -   | 444.65       | 121 | 629.00       | 121 | (15.28)    | -   |
| 97        | 78        | C   | K6204a | hexane-2,4-dione               | 3002-24-2  | 1.0          | 293.15     | 959.00                                | 120 | -                                           | -   | -            | -   | 433.15       | 121 | 629.00       | 121 | (15.28)    | -   |
| 98        | 78        | C   | K6204b | hexane-2,4-dione               | 3002-24-2  | 0.01         | 323.57     | -                                     | -   | 44.21                                       | 121 | -            | -   | 433.15       | 121 | 629.00       | 121 | (15.28)    | -   |
| 99        | 79        | C   | K6205a | hexane-2,5-dione               | 110-13-4   | 0.01         | 350.77     | 884.64                                | 121 | -                                           | -   | 267.65       | 120 | 467.15       | 121 | 629.00       | 121 | (15.28)    | -   |
| 100       | 79        | C   | K6205b | hexane-2,5-dione               | 110-13-4   | 1.0          | 401.0      | -                                     | -   | 50.10                                       | 114 | 267.65       | 120 | 467.15       | 121 | 629.00       | 121 | (15.28)    | -   |
| 101       | 80        | C   | E3201a | methyl acetate                 | 79-20-9    | 1.01         | 298.15     | 927.50                                | 118 | 32.30                                       | 114 | 174.95       | 120 | 330.09       | 121 | 506.55       | 121 | 7.07       | 120 |
| 102       | 81        | C   | E4201a | methyl propanoate              | 554-12-1   | 1.0          | 298.15     | 909.10                                | 118 | 35.70                                       | 114 | 185.65       | 120 | 352.60       | 121 | 530.60       | 121 | 6.200      | 120 |
| 103       | 82        | C   | E4202a | ethyl acetate                  | 141-78-6   | 1.0          | 298.15     | 894.27                                | 116 | 35.10                                       | 114 | 189.35       | 120 | 350.21       | 121 | 523.30       | 121 | 6.0814     | 120 |
| 104       | 83        | C   | E5201a | methyl 2-methylpropanoate      | 547-63-7   | 1.0          | 298.15     | 883.30                                | 116 | 37.30                                       | 114 | 188.55       | 120 | 365.65       | 121 | 540.70       | 121 | (5.62)     | -   |
| 105       | 84        | C   | E5202a | propan-2-yl acetate            | 108-21-4   | 1.0          | 298.15     | 869.00                                | 116 | 37.00                                       | 114 | 199.75       | 120 | 361.65       | 121 | 532.00       | 121 | (5.62)     | -   |
| 106       | 85        | C   | E5203a | methyl butanoate               | 623-42-7   | 1.01         | 298.15     | 892.52                                | 118 | 39.80                                       | 114 | 187.35       | 120 | 375.90       | 121 | 554.50       | 121 | 5.48       | 120 |
| 107       | 86        | C   | E5204a | ethyl propanoate               | 105-37-3   | 1.0          | 298.15     | 884.04                                | 116 | 39.30                                       | 114 | 199.55       | 120 | 372.25       | 121 | 546.00       | 121 | 5.76       | 120 |
| 108       | 87        | C   | E5205a | propyl acetate                 | 109-60-4   | 1.01         | 298.15     | 882.80                                | 118 | 39.10                                       | 114 | 180.15       | 120 | 374.65       | 121 | 549.73       | 121 | 5.62       | 120 |
| 109       | 88        | C   | E6201a | methyl 2,2-dimethylpropanoate  | 598-98-1   | 1.0          | 293.15     | 850.00                                | 116 | 38.80                                       | 114 | -            | -   | 374.25       | 121 | -            | -   | (5.20)     | -   |
| 110       | 89        | C   | E6202a | tert-butyl acetate             | 540-88-5   | 1.0          | 298.15     | 861.59                                | 116 | 38.00                                       | 114 | -            | -   | 369.15       | 121 | 564.61       | 121 | 5.672      | 120 |
| 111       | 90        | C   | E6203a | methyl 2-methylbutanoate       | 868-57-5   | 1.0          | 293.15     | 884.70                                | 116 | -                                           | -   | -            | -   | -            | -   | -            | -   | (5.20)     | -   |
| 112       | 91        | C   | E6204a | ethyl 2-methylpropanoate       | 97-62-1    | 1.0          | 298.15     | 864.04                                | 116 | 39.80                                       | 114 | 175.35       | 120 | 383.00       | 121 | 553.15       | 121 | (5.20)     | -   |
| 113       | 92        | C   | E6205a | methyl 3-methylbutanoate       | 556-24-1   | 1.0          | 298.15     | 875.87                                | 116 | -                                           | -   | -            | -   | 389.65       | 121 | 564.61       | 121 | (5.20)     | -   |
| 114       | 92        | C   | E6205b | methyl 3-methylbutanoate       | 556-24-1   | 0.02         | 298.15     | -                                     | -   | 39.41                                       | 121 | -            | -   | 389.65       | 121 | 564.61       | 121 | (5.20)     | -   |
| 115       | 93        | C   | E6206a | propan-2-yl propanoate         | 637-78-5   | 1.0          | 298.15     | 860.10                                | 116 | -                                           | -   | -            | -   | 383.15       | 121 | 553.00       | 121 | (5.20)     | -   |
| 116       | 93        | C   | E6206b | propan-2-yl propanoate         | 637-78-5   | 0.03         | 298.15     | -                                     | -   | 38.40                                       | 121 | -            | -   | 383.15       | 121 | 553.00       | 121 | (5.20)     | -   |
| 117       | 94        | C   | E6207a | 2-methylpropyl acetate         | 110-19-0   | 1.0          | 298.15     | 866.29                                | 116 | -                                           | -   | 176.05       | 120 | 389.80       | 121 | 560.80       | 121 | 5.068      | 120 |
| 118       | 94        | C   | E6207b | 2-methylpropyl acetate         | 110-19-0   | 0.02         | 298.15     | -                                     | -   | 39.52                                       | 121 | 176.05       | 120 | 389.80       | 121 | 560.80       | 121 | 5.068      | 120 |
| 119       | 95        | C   | E6208a | butan-2-yl acetate             | 105-46-4   | 1.0          | 298.15     | 866.05                                | 116 | 40.70                                       | 114 | 174.25       | 120 | 385.15       | 121 | 564.61       | 121 | 5.135      | 120 |
| 120       | 96        | C   | E6209a | methyl pentanoate              | 624-24-8   | 1.0          | 298.15     | 885.17                                | 116 | 43.70                                       | 114 | -            | -   | 400.55       | 121 | 564.61       | 121 | 4.992      | 120 |
| 121       | 97        | C   | E6210a | ethyl butanoate                | 105-54-4   | 1.0          | 298.15     | 873.78                                | 116 | 42.00                                       | 114 | 176.15       | 120 | 394.65       | 121 | 571.00       | 121 | 5.18       | 120 |
| 122       | 98        | C   | E6211a | propyl propanoate              | 106-36-5   | 1.0          | 298.15     | 876.35                                | 116 | 43.20                                       | 114 | 197.25       | 120 | 395.65       | 121 | 568.60       | 121 | 5.249      | 120 |
| 123       | 99        | C   | E6212a | butyl acetate                  | 123-86-4   | 1.0          | 298.15     | 876.36                                | 116 | 42.70                                       | 114 | 196.15       | 120 | 399.15       | 121 | 575.40       | 121 | 5.07       | 120 |
| 124       | 100       | C   | E5402a | dimethyl propanedioate         | 108-59-8   | 1.0          | 298.15     | 1146.71                               | 116 | 57.50                                       | 114 | 211.15       | 120 | 454.55       | 121 | -            | -   | 9.82       | 120 |
| 125       | 101       | C   | E5403a | acetyloxymethyl acetate        | 628-51-3   | 1.0          | 298.15     | 1135.50                               | 116 | 56.40                                       | 114 | -            | -   | 437.65       | 121 | -            | -   | (9.82)     | -   |
| 126       | 102       | C   | E6401a | dimethyl 2-methylpropanedioate | 609-02-9   | 1.0          | 298.15     | 1093.63                               | 116 | -                                           | -   | -            | -   | 447.15       | 121 | -            | -   | (7.72)     | -   |
| 127       | 102       | C   | E6401b | dimethyl 2-methylpropanedioate | 609-02-9   | 1.0          | 293.0      | -                                     | -   | 57.80                                       | 114 | -            | -   | 447.15       | 121 | -            | -   | (7.72)     | -   |
| 128       | 103       | C   | E6402a | methyl 2-acetyloxypropanoate   | 6284-75-9  | 1.0          | 352.0      | -                                     | -   | 52.90                                       | 114 | -            | -   | -            | -   | -            | -   | (7.72)     | -   |
| 129       | 104       | C   | E6403a | 1-acetyloxyethyl acetate       | 542-10-9   | 1.0          | 298.15     | 1070.00                               | 120 | 59.00                                       | 114 | 292.05       | 120 | 442.15       | 121 | 635.00       | 121 | (7.72)     | -   |
| 130       | 105       | C   | E6405a | dimethyl butanedioate          | 106-65-0   | 1.0          | 298.15     | 1114.00                               | 116 | 60.90                                       | 114 | 291.75       | 120 | 469.55       | 121 | 657.00       | 121 | 7.19       | 120 |
| 131       | 106       | C   | E6406a | methyl 3-acetyloxypropanoate   | 38003-42-8 | 1.0          | 350.0      | -                                     | -   | 68.00                                       | 114 | -            | -   | -            | -   | -            | -   | (7.72)     | -   |
| 132       | 107       | C   | E6407a | ethyl 2-acetyloxyacetate       | 623-86-9   | 1.0          | 452.15     | -                                     | -   | 39.31                                       | 121 | -            | -   | 452.15       | 121 | -            | -   | (7.72)     | -   |
| 133       | 108       | C   | E6408a | 2-acetyloxyethyl acetate       | 111-55-7   | 1.0          | 298.15     | 1098.70                               | 116 | 61.00                                       | 114 | 242.15       | 120 | 463.65       | 121 | 653.00       | 121 | 7.7        | 120 |
| 134       | 109       | C   | F2201a | methyl formate                 | 107-31-3   | 1.0          | 298.15     | 966.82                                | 116 | 28.40                                       | 114 | 173.45       | 120 | 304.90       | 121 | 487.20       | 121 | 9.20       | 120 |
| 135       | 110       | C   | F3201a | ethyl formate                  | 109-94-4   | 1.0          | 298.15     | 915.87                                | 116 | 31.50                                       | 114 | 193.55       | 120 | 327.46       | 121 | 508.40       | 121 | 8.57       | 120 |
| 136       | 111       | C   | F4201a | propan-2-yl formate            | 625-55-8   | 0.17         | 298.15     | 870.23                                | 121 | 31.58                                       | 121 | -            | -   | 341.25       | 121 | 514.90       | 121 | (6.92)     | -   |
| 137       | 112       | C   | F4202a | propyl formate                 | 110-74-7   | 1.0          | 298.15     | 899.89                                | 116 | 36.60                                       | 114 | 180.25       | 120 | 353.97       | 121 | 538.00       | 121 | 6.92       | 120 |
| 138       | 113       | C   | F5201a | tert-butyl formate             | 762-75-4   | 0.09         | 298.15     | 871.91                                | 121 | 33.63                                       | 121 | -            | -   | 355.95       | 121 | 540.95       | 121 | (6.25)     | -   |
| 139       | 114       | C   | F5202a | 2-methylpropyl formate         | 542-55-2   | 1.0          | 298.15     | 875.70                                | 116 | -                                           | -   | 177.65       | 120 | 371.22       | 121 | 551.35       | 121 | 6.41       | 120 |
| 140       | 114       | C   | F5202b | 2-methylpropyl formate         | 542-55-2   | 0.05         | 298.15     | -                                     | -   | 36.15                                       | 121 | 177.65       | 120 | 371.22       | 121 | 551.35       | 121 | 6.41       | 120 |
| 141       | 115       | C   | F5203a | butan-2-yl formate             | 589-40-2   | 0.06         | 298.15     | 878.57                                | 121 | 36.77                                       | 121 | -            | -   | 363.55       | 121 | 540.95       | 121 | (6.25)     | -   |

Table S.1 – Reference experimental data (continued)

| $n_{sim}$ | $n_{iso}$ | Set | Code   | Name                       | CAS        | $P$<br>[bar] | $T$<br>[K] | $\rho_{liq}$<br>[kg·m <sup>-3</sup> ] | Src | $\Delta H_{vap}$<br>[kJ·mol <sup>-1</sup> ] | Src | $T_m$<br>[K] | Src | $T_b$<br>[K] | Src | $T_c$<br>[K] | Src | $\epsilon$ | Src |
|-----------|-----------|-----|--------|----------------------------|------------|--------------|------------|---------------------------------------|-----|---------------------------------------------|-----|--------------|-----|--------------|-----|--------------|-----|------------|-----|
| 142       | 116       | C   | F5204a | butyl formate              | 592-84-7   | 1.0          | 298.15     | 887.64                                | 116 | 40.50                                       | 114 | 183.15       | 120 | 379.25       | 121 | 540.95       | 121 | 6.10       | 120 |
| 143       | 117       | C   | F6202a | 2-methylbutan-2-yl formate | 757-88-0   | 0.02         | 298.15     | 883.69                                | 121 | -                                           | -   | -            | -   | 385.65       | 121 | 564.61       | 121 | (5.57)     | -   |
| 144       | 118       | C   | F6205a | pentan-3-yl formate        | 58368-67-5 | 0.02         | 298.15     | 874.27                                | 121 | -                                           | -   | -            | -   | 393.76       | 121 | 564.61       | 121 | (5.57)     | -   |
| 145       | 119       | C   | F6206a | 3-methylbutyl formate      | 110-45-2   | 1.0          | 298.15     | 877.00                                | 116 | -                                           | -   | 179.65       | 120 | 397.15       | 120 | 564.61       | 121 | 5.44       | 120 |
| 146       | 119       | C   | F6206b | 3-methylbutyl formate      | 110-45-2   | 0.01         | 298.85     | -                                     | -   | 40.77                                       | 121 | 179.65       | 120 | 397.15       | 120 | 564.61       | 121 | 5.44       | 120 |
| 147       | 120       | C   | F6208a | pentyl formate             | 638-49-3   | 1.0          | 298.15     | 880.37                                | 116 | 45.20                                       | 114 | 200.15       | 120 | 406.60       | 121 | 576.00       | 121 | 5.7        | 120 |
| 148       | 121       | C   | F4401a | 2-formyloxyethyl formate   | 629-15-2   | 1.0          | 273.15     | 1193.00                               | 120 | -                                           | -   | -            | -   | 447.15       | 121 | -            | -   | (6.0)      | -   |
| 149       | 121       | C   | F4401b | 2-formyloxyethyl formate   | 629-15-2   | 1.0          | 447.15     | -                                     | -   | 38.83                                       | 121 | -            | -   | 447.15       | 121 | -            | -   | (6.0)      | -   |
| 150       | 122       | C   | F5401a | 2-formyloxypropyl formate  | 53818-14-7 | 1.0          | 348.15     | -                                     | -   | 29.51                                       | 121 | -            | -   | 348.15       | 121 | -            | -   | (6.0)      | -   |
| 151       | 123       | C   | L1101a | methanol                   | 67-56-1    | 1.01         | 298.15     | 786.74                                | 118 | 37.70                                       | 114 | 175.65       | 120 | 337.85       | 121 | 512.64       | 121 | 33.0       | 120 |
| 152       | 124       | C   | L2101a | ethanol                    | 64-17-5    | 1.01         | 298.15     | 786.60                                | 118 | 42.26                                       | 114 | 159.01       | 120 | 351.44       | 121 | 513.92       | 121 | 25.3       | 120 |
| 153       | 125       | C   | L3101a | propan-2-ol                | 67-63-0    | 1.0          | 298.15     | 781.23                                | 115 | 44.40                                       | 114 | 185.24       | 120 | 355.41       | 121 | 508.31       | 121 | 20.18      | 120 |
| 154       | 126       | C   | L3102a | propan-1-ol                | 71-23-8    | 1.0          | 298.15     | 799.81                                | 115 | 46.60                                       | 114 | 148.76       | 120 | 370.35       | 121 | 536.78       | 121 | 20.8       | 120 |
| 155       | 127       | C   | L4101a | 2-methylpropan-2-ol        | 75-65-0    | 1.0          | 299.15     | 779.48                                | 115 | 46.20                                       | 114 | 298.96       | 120 | 355.57       | 121 | 506.21       | 121 | 12.47      | 120 |
| 156       | 128       | C   | L4102a | 2-methylpropan-1-ol        | 78-83-1    | 1.0          | 298.15     | 797.81                                | 115 | 50.79                                       | 114 | 171.19       | 120 | 380.81       | 121 | 547.78       | 121 | 17.93      | 120 |
| 157       | 129       | C   | L4103a | butan-2-ol                 | 78-92-2    | 1.01         | 298.15     | 803.01                                | 118 | 48.50                                       | 114 | 184.71       | 120 | 372.70       | 121 | 536.05       | 121 | 17.26      | 120 |
| 158       | 130       | C   | L4104a | butan-1-ol                 | 71-36-3    | 1.0          | 298.15     | 805.80                                | 118 | 52.10                                       | 114 | 184.55       | 120 | 390.81       | 121 | 563.05       | 121 | 17.84      | 120 |
| 159       | 131       | C   | L5101a | 2,2-dimethylpropan-1-ol    | 75-84-3    | 0.08         | 327.15     | 780.00                                | 121 | -                                           | -   | 328.15       | 120 | 386.25       | 121 | 569.99       | 121 | 8.35       | 120 |
| 160       | 131       | C   | L5101b | 2,2-dimethylpropan-1-ol    | 75-84-3    | 1.0          | 345.0      | -                                     | -   | 47.50                                       | 114 | 328.15       | 120 | 386.25       | 121 | 569.99       | 121 | 8.35       | 120 |
| 161       | 132       | C   | L5102a | 2-methylbutan-2-ol         | 75-85-4    | 1.0          | 298.15     | 804.73                                | 115 | 50.10                                       | 114 | 264.45       | 120 | 375.15       | 121 | 543.70       | 121 | 5.78       | 120 |
| 162       | 133       | C   | L5103a | 3-methylbutan-2-ol         | 598-75-4   | 1.0          | 298.15     | 815.00                                | 115 | -                                           | -   | -            | -   | 384.65       | 121 | 556.10       | 121 | (11.99)    | -   |
| 163       | 134       | C   | L5104a | 2-methylbutan-1-ol         | 137-32-6   | 1.0          | 298.15     | 815.20                                | 115 | 54.10                                       | 114 | -            | -   | 401.85       | 121 | 575.40       | 121 | (11.99)    | -   |
| 164       | 135       | C   | L5105a | pentan-3-ol                | 584-02-1   | 1.0          | 298.15     | 815.40                                | 115 | 52.90                                       | 114 | 203.25       | 120 | 388.45       | 121 | 559.60       | 121 | 13.35      | 120 |
| 165       | 136       | C   | L5106a | 3-methylbutan-1-ol         | 123-51-3   | 1.0          | 298.15     | 806.90                                | 115 | 55.30                                       | 114 | 155.95       | 120 | 404.35       | 121 | 577.20       | 121 | 15.63      | 120 |
| 166       | 137       | C   | L5107a | pentan-2-ol                | 6032-29-7  | 1.01         | 298.15     | 805.30                                | 118 | 53.60                                       | 114 | 200.15       | 120 | 392.15       | 121 | 560.30       | 121 | 13.71      | 120 |
| 167       | 138       | C   | L5108a | pentan-1-ol                | 71-41-0    | 1.0          | 298.15     | 811.34                                | 115 | 56.90                                       | 114 | 195.57       | 120 | 410.95       | 121 | 588.10       | 121 | 15.13      | 120 |
| 168       | 139       | C   | L6101a | 3,3-dimethylbutan-2-ol     | 464-07-3   | 0.01         | 298.15     | 813.91                                | 121 | -                                           | -   | -            | -   | 393.15       | 121 | 596.03       | 121 | (8.51)     | -   |
| 169       | 139       | C   | L6101b | 3,3-dimethylbutan-2-ol     | 464-07-3   | 1.0          | 298.0      | -                                     | -   | 53.80                                       | 114 | -            | -   | 393.15       | 121 | 596.03       | 121 | (8.51)     | -   |
| 170       | 140       | C   | L6102a | 2,3-dimethylbutan-2-ol     | 594-60-5   | 1.0          | 298.15     | 818.59                                | 115 | 54.00                                       | 114 | 262.65       | 120 | 391.75       | 121 | 596.03       | 121 | (8.51)     | -   |
| 171       | 141       | C   | L6103a | 2,2-dimethylbutan-1-ol     | 1185-33-7  | 1.0          | 298.15     | 824.50                                | 115 | 55.7                                        | 114 | -            | -   | 409.95       | 121 | 596.03       | 121 | 10.5       | 120 |
| 172       | 141       | C   | L6103b | 2,2-dimethylbutan-1-ol     | 1185-33-7  | 1.0          | 313.0      | -                                     | -   | 52.10                                       | 114 | -            | -   | 409.95       | 121 | 596.03       | 121 | 10.5       | 120 |
| 173       | 142       | C   | L6104a | 3-methylpentan-3-ol        | 77-74-7    | 1.0          | 298.15     | 823.80                                | 115 | -                                           | -   | 249.55       | 120 | 395.56       | 121 | 575.60       | 121 | 4.322      | 120 |
| 174       | 143       | C   | L6105a | 3,3-dimethylbutan-1-ol     | 624-95-3   | 1.0          | 298.15     | 809.70                                | 115 | 58.00                                       | 114 | 213.15       | 120 | 416.15       | 121 | 596.03       | 121 | (8.51)     | -   |
| 175       | 144       | C   | L6106a | 2-methylpentan-2-ol        | 590-36-3   | 1.0          | 298.15     | 809.45                                | 115 | 54.70                                       | 114 | 170.15       | 120 | 394.56       | 121 | 559.50       | 121 | (8.51)     | -   |
| 176       | 145       | C   | L6107a | 2,3-dimethylbutan-1-ol     | 19550-30-2 | 1.0          | 298.15     | 823.70                                | 115 | -                                           | -   | -            | -   | 422.15       | 121 | 596.03       | 121 | (8.51)     | -   |
| 177       | 145       | C   | L6107b | 2,3-dimethylbutan-1-ol     | 19550-30-2 | 1.0          | 339.0      | -                                     | -   | 51.40                                       | 114 | -            | -   | 422.15       | 121 | 596.03       | 121 | (8.51)     | -   |
| 178       | 146       | C   | L6108a | 3-methylpentan-2-ol        | 565-60-6   | 1.0          | 298.15     | 824.73                                | 115 | 58.20                                       | 114 | -            | -   | 407.36       | 121 | 596.03       | 121 | (8.51)     | -   |
| 179       | 147       | C   | L6109a | 2-methylpentan-3-ol        | 565-67-3   | 1.0          | 298.15     | 820.13                                | 115 | 56.00                                       | 114 | -            | -   | 399.66       | 121 | 596.03       | 121 | (8.51)     | -   |
| 180       | 148       | C   | L6110a | 4-methylpentan-2-ol        | 108-11-2   | 1.0          | 298.15     | 803.04                                | 115 | -                                           | -   | 183.15       | 120 | 404.85       | 121 | 574.40       | 121 | (8.51)     | -   |
| 181       | 148       | C   | L6110b | 4-methylpentan-2-ol        | 108-11-2   | 1.0          | 308.0      | -                                     | -   | 49.60                                       | 114 | 183.15       | 120 | 404.85       | 121 | 574.40       | 121 | (8.51)     | -   |
| 182       | 149       | C   | L6111a | 2-ethylbutan-1-ol          | 97-95-0    | 1.0          | 298.15     | 829.27                                | 115 | 60.30                                       | 114 | -            | -   | 419.65       | 121 | 596.03       | 121 | 6.19       | 120 |
| 183       | 150       | C   | L6112a | 3-methylpentan-1-ol        | 589-35-5   | 1.0          | 298.15     | 820.50                                | 115 | 61.70                                       | 114 | -            | -   | 425.55       | 121 | 596.03       | 121 | (8.51)     | -   |
| 184       | 151       | C   | L6113a | 2-methylpentan-1-ol        | 105-30-6   | 1.0          | 298.15     | 820.63                                | 115 | 59.40                                       | 114 | -            | -   | 421.15       | 121 | 604.40       | 121 | (8.51)     | -   |
| 185       | 152       | C   | L6114a | hexan-3-ol                 | 623-37-0   | 1.0          | 298.15     | 814.49                                | 115 | 58.60                                       | 114 | -            | -   | 408.55       | 121 | 596.03       | 121 | (8.51)     | -   |
| 186       | 153       | C   | L6115a | 4-methylpentan-1-ol        | 626-89-1   | 1.0          | 298.15     | 809.72                                | 115 | -                                           | -   | -            | -   | 424.95       | 121 | 603.50       | 121 | (8.51)     | -   |
| 187       | 153       | C   | L6115b | 4-methylpentan-1-ol        | 626-89-1   | 1.0          | 313.0      | -                                     | -   | 63.90                                       | 114 | -            | -   | 424.95       | 121 | 603.50       | 121 | (8.51)     | -   |
| 188       | 154       | C   | L6116a | hexan-2-ol                 | 626-93-7   | 1.0          | 298.15     | 810.34                                | 115 | 58.30                                       | 114 | -            | -   | 413.04       | 121 | 585.90       | 121 | (8.51)     | -   |
| 189       | 155       | C   | L6117a | hexan-1-ol                 | 111-27-3   | 1.0          | 298.15     | 815.54                                | 115 | 59.60                                       | 114 | 226.75       | 120 | 430.15       | 121 | 610.30       | 121 | 13.03      | 120 |

Table S.1 – Reference experimental data (continued)

| $n_{\text{sim}}$ | $n_{\text{iso}}$ | Set | Code   | Name                             | CAS        | $P$   | $T$    | $\rho_{\text{liq}}$   | Src | $\Delta H_{\text{vap}}$ | Src | $T_m$  | Src | $T_b$  | Src | $T_c$  | Src | $\epsilon$ | Src |
|------------------|------------------|-----|--------|----------------------------------|------------|-------|--------|-----------------------|-----|-------------------------|-----|--------|-----|--------|-----|--------|-----|------------|-----|
|                  |                  |     |        |                                  |            | [bar] | [K]    | [kg·m <sup>-3</sup> ] |     | [kJ·mol <sup>-1</sup> ] |     | [K]    |     | [K]    |     |        |     |            |     |
| 190              | 156              | C   | L2201a | ethane-1,2-diol                  | 107-21-1   | 1.0   | 298.15 | 1109.94               | 115 | 64.80                   | 114 | 260.15 | 120 | 470.45 | 121 | 720.00 | 121 | 41.4       | 120 |
| 191              | 157              | C   | L3201a | propane-1,2-diol                 | 57-55-6    | 1.0   | 298.15 | 1032.52               | 115 | 62.20                   | 114 | 213.15 | 120 | 460.75 | 121 | 700.17 | 121 | 27.5       | 120 |
| 192              | 158              | C   | L3202a | propane-1,3-diol                 | 504-63-2   | 1.0   | 298.15 | 1050.30               | 115 | 69.80                   | 114 | 245.55 | 120 | 487.55 | 121 | 724.00 | 121 | 35.1       | 120 |
| 193              | 159              | C   | L4201a | 2-methylpropane-1,2-diol         | 558-43-0   | 1.0   | 298.15 | 989.60                | 115 | -                       | -   | -      | -   | 451.15 | 121 | 728.82 | 121 | (30.35)    | -   |
| 194              | 160              | C   | L4202a | butane-2,3-diol                  | 513-85-9   | 1.0   | 298.15 | 999.80                | 115 | -                       | -   | -      | -   | 455.15 | 121 | 728.82 | 121 | (30.35)    | -   |
| 195              | 160              | C   | L4202b | butane-2,3-diol                  | 513-85-9   | 1.0   | 332.0  | -                     | -   | 58.40                   | 114 | -      | -   | 455.15 | 121 | 728.82 | 121 | (30.35)    | -   |
| 196              | 161              | C   | L4203a | 2-methylpropane-1,3-diol         | 2163-42-0  | 1.0   | 293.15 | 1009.00               | 115 | 71.30                   | 114 | 182.15 | 120 | 487.15 | 121 | 728.82 | 121 | (30.35)    | -   |
| 197              | 162              | C   | L4204a | butane-1,2-diol                  | 584-03-2   | 1.0   | 298.15 | 999.22                | 115 | -                       | -   | -      | -   | 464.15 | 121 | 680.00 | 121 | (30.35)    | -   |
| 198              | 163              | C   | L4205a | butane-1,3-diol                  | 107-88-0   | 1.0   | 298.15 | 1000.20               | 115 | 72.60                   | 114 | 196.15 | 120 | 480.15 | 121 | 676.00 | 121 | 28.8       | 120 |
| 199              | 164              | C   | L4206a | butane-1,4-diol                  | 110-63-4   | 1.0   | 298.15 | 1015.40               | 115 | 76.60                   | 114 | 293.58 | 120 | 501.15 | 121 | 728.82 | 121 | 31.9       | 120 |
| 200              | 165              | C   | L5201a | 2-methylbutane-2,3-diol          | 5396-58-7  | 1.0   | 298.15 | 968.80                | 115 | -                       | -   | -      | -   | 447.15 | 121 | 754.49 | 121 | (22.21)    | -   |
| 201              | 166              | C   | L5204a | 3-methylbutane-1,3-diol          | 2568-33-4  | 1.0   | 293.15 | 964.50                | 115 | -                       | -   | -      | -   | 472.15 | 121 | 754.49 | 121 | 24.56      | 122 |
| 202              | 167              | C   | L5205a | 2-methylbutane-1,3-diol          | 684-84-4   | 1.0   | 293.15 | 991.70                | 115 | -                       | -   | -      | -   | 473.15 | 121 | 754.49 | 121 | (22.21)    | -   |
| 203              | 168              | C   | L5206a | 3-methylbutane-1,2-diol          | 50468-22-9 | 1.0   | 294.65 | 984.20                | 115 | -                       | -   | -      | -   | 473.15 | 121 | 754.49 | 121 | (22.21)    | -   |
| 204              | 169              | C   | L5207a | pentane-2,3-diol                 | 42027-23-6 | 1.0   | 292.15 | 979.80                | 120 | -                       | -   | -      | -   | 460.65 | 121 | 754.49 | 121 | 17.37      | 120 |
| 205              | 170              | C   | L5208a | pentane-2,4-diol                 | 625-69-4   | 1.0   | 298.15 | 956.00                | 115 | 72.50                   | 114 | -      | -   | 472.15 | 121 | 754.49 | 121 | 24.69      | 120 |
| 206              | 171              | C   | L5211a | pentane-1,3-diol                 | 3174-67-2  | 1.0   | 293.15 | 981.00                | 115 | -                       | -   | -      | -   | 494.15 | 121 | 754.49 | 121 | (22.21)    | -   |
| 207              | 172              | C   | L5212a | pentane-1,2-diol                 | 5343-92-0  | 1.0   | 297.15 | 969.10                | 115 | 74.60                   | 114 | -      | -   | 482.15 | 121 | 754.49 | 121 | (22.21)    | -   |
| 208              | 173              | C   | L5213a | pentane-1,4-diol                 | 626-95-9   | 1.0   | 293.15 | 989.50                | 115 | -                       | -   | -      | -   | 497.00 | 121 | 754.49 | 121 | 26.74      | 120 |
| 209              | 174              | C   | L5214a | pentane-1,5-diol                 | 111-29-5   | 1.0   | 298.15 | 989.71                | 115 | 86.80                   | 114 | 253.15 | 120 | 512.15 | 121 | 754.49 | 121 | 26.2       | 120 |
| 210              | 175              | C   | L6201a | 2,3-dimethylbutane-2,3-diol      | 76-09-5    | 0.002 | 316.45 | 970.40                | 121 | -                       | -   | 316.45 | 120 | 445.95 | 121 | 777.84 | 121 | (25.86)    | -   |
| 211              | 176              | C   | L6204a | 3-methylpentane-2,3-diol         | 63521-37-9 | 1.0   | 298.15 | 963.80                | 115 | -                       | -   | -      | -   | 505.76 | 121 | 777.84 | 121 | (25.86)    | -   |
| 212              | 177              | C   | L6205a | 3,3-dimethylbutane-1,2-diol      | 59562-82-2 | 1.0   | 323.15 | 940.00                | 115 | -                       | -   | -      | -   | 478.65 | 121 | 777.84 | 121 | (25.86)    | -   |
| 213              | 178              | C   | L6206a | 2,3-dimethylbutane-1,3-diol      | 24893-35-4 | 1.0   | 298.15 | 964.50                | 115 | -                       | -   | -      | -   | 480.00 | 121 | 777.84 | 121 | (25.86)    | -   |
| 214              | 179              | C   | L6207a | 2-methylpentane-2,3-diol         | 7795-80-4  | 1.0   | 293.15 | 962.70                | 115 | -                       | -   | -      | -   | 505.76 | 121 | 777.84 | 121 | (25.86)    | -   |
| 215              | 180              | C   | L6208a | 2-methylpentane-2,4-diol         | 107-41-5   | 1.0   | 298.15 | 918.53                | 115 | 68.60                   | 114 | 223.15 | 120 | 470.65 | 121 | 777.84 | 121 | 25.86      | 120 |
| 216              | 181              | C   | L6209a | 3-methylpentane-2,4-diol         | 5683-44-3  | 1.0   | 287.15 | 990.60                | 115 | -                       | -   | -      | -   | 484.65 | 121 | 777.84 | 121 | (25.86)    | -   |
| 217              | 182              | C   | L6210a | 2-ethyl-2-methylpropane-1,3-diol | 77-84-9    | 1.0   | 323.15 | 958.20                | 115 | -                       | -   | -      | -   | 498.95 | 121 | 777.84 | 121 | (25.86)    | -   |
| 218              | 183              | C   | L6212a | 2,2-dimethylbutane-1,4-diol      | 32812-23-0 | 1.0   | 277.15 | 996.00                | 115 | -                       | -   | -      | -   | 480.00 | 121 | 777.84 | 121 | (25.86)    | -   |
| 219              | 184              | C   | L6213a | 3-methylpentane-1,3-diol         | 33879-72-0 | 1.0   | 293.15 | 969.00                | 115 | -                       | -   | -      | -   | 482.98 | 121 | 777.84 | 121 | (25.86)    | -   |
| 220              | 185              | C   | L6215a | 4-methylpentane-1,4-diol         | 1462-10-8  | 1.0   | 293.15 | 964.50                | 115 | -                       | -   | -      | -   | 494.35 | 121 | 777.84 | 121 | (25.86)    | -   |
| 221              | 186              | C   | L6216a | 2-propan-2-ylpropane-1,3-diol    | 2612-27-3  | 1.0   | 293.15 | 976.80                | 115 | -                       | -   | -      | -   | 496.94 | 121 | 777.84 | 121 | (25.86)    | -   |
| 222              | 187              | C   | L6217a | 2-ethylbutane-1,3-diol           | 66553-17-1 | 1.0   | 298.15 | 967.70                | 115 | -                       | -   | -      | -   | 480.00 | 121 | 777.84 | 121 | (25.86)    | -   |
| 223              | 188              | C   | L6218a | 2,3-dimethylbutane-1,4-diol      | 57716-80-0 | 1.0   | 293.15 | 977.10                | 115 | -                       | -   | -      | -   | -      | -   | -      | -   | (25.86)    | -   |
| 224              | 189              | C   | L6219a | 2-methylpentane-1,3-diol         | 149-31-5   | 1.0   | 295.15 | 973.70                | 115 | -                       | -   | -      | -   | 493.45 | 121 | 777.84 | 121 | (25.86)    | -   |
| 225              | 190              | C   | L6220a | hexane-3,4-diol                  | 922-17-8   | 1.0   | 273.15 | 799.30                | 115 | -                       | -   | -      | -   | 496.94 | 121 | 777.84 | 121 | (25.86)    | -   |
| 226              | 191              | C   | L6221a | hexane-2,3-diol                  | 617-30-1   | 1.0   | 288.15 | 989.00                | 115 | -                       | -   | -      | -   | 478.15 | 121 | 777.84 | 121 | (25.86)    | -   |
| 227              | 192              | C   | L6222a | hexane-2,4-diol                  | 19780-90-6 | 1.0   | 294.15 | 951.60                | 115 | -                       | -   | -      | -   | 484.15 | 121 | 777.84 | 121 | (25.86)    | -   |
| 228              | 193              | C   | L6223a | hexane-2,5-diol                  | 2935-44-6  | 1.0   | 323.15 | 939.80                | 115 | -                       | -   | 316.15 | 120 | 493.95 | 121 | 777.84 | 121 | (25.86)    | -   |
| 229              | 194              | C   | L6224a | 2-propylpropane-1,3-diol         | 2612-28-4  | 1.0   | 298.15 | 963.60                | 115 | -                       | -   | -      | -   | 474.16 | 121 | 777.84 | 121 | (25.86)    | -   |
| 230              | 195              | C   | L6225a | 3-methylpentane-1,5-diol         | 4457-71-0  | 1.0   | 293.15 | 972.60                | 115 | -                       | -   | -      | -   | 521.55 | 121 | 777.84 | 121 | (25.86)    | -   |
| 231              | 196              | C   | L6226a | 2-methylpentane-1,5-diol         | 42856-62-2 | 1.0   | 293.15 | 971.90                | 115 | -                       | -   | -      | -   | 496.94 | 121 | 777.84 | 121 | (25.86)    | -   |
| 232              | 197              | C   | L6227a | hexane-1,3-diol                  | 21531-91-9 | 1.0   | 295.15 | 958.00                | 115 | -                       | -   | -      | -   | 508.15 | 121 | 777.84 | 121 | (25.86)    | -   |
| 233              | 198              | C   | L6228a | hexane-1,4-diol                  | 16432-53-4 | 1.0   | 289.45 | 982.00                | 115 | -                       | -   | -      | -   | 529.15 | 121 | 777.84 | 121 | (25.86)    | -   |
| 234              | 199              | C   | L6230a | hexane-1,5-diol                  | 928-40-5   | 1.0   | 298.15 | 964.00                | 115 | -                       | -   | -      | -   | 510.15 | 121 | 777.84 | 121 | (25.86)    | -   |
| 235              | 200              | C   | L6231a | hexane-1,6-diol                  | 629-11-8   | 1.0   | 318.15 | 968.30                | 115 | -                       | -   | 314.65 | 120 | 516.15 | 121 | 777.84 | 121 | (25.86)    | -   |
| 236              | 200              | C   | L6231b | hexane-1,6-diol                  | 629-11-8   | 1.0   | 342.0  | -                     | -   | 87.00                   | 114 | 314.65 | 120 | 516.15 | 121 | 777.84 | 121 | (25.86)    | -   |
| 237              | 201              | C   | L3301a | propane-1,2,3-triol              | 56-81-5    | 1.0   | 298.15 | 1258.30               | 115 | -                       | -   | 291.35 | 120 | 563.15 | 121 | 850.00 | 121 | 46.53      | 120 |

Table S.1 – Reference experimental data (continued)

| $n_{\text{sim}}$ | $n_{\text{iso}}$ | Set | Code   | Name                       | CAS        | $P$<br>[bar] | $T$<br>[K] | $\rho_{\text{liq}}$<br>[kg·m <sup>-3</sup> ] | Src | $\Delta H_{\text{vap}}$<br>[kJ·mol <sup>-1</sup> ] | Src | $T_m$<br>[K] | Src | $T_b$<br>[K] | Src | $T_c$<br>[K] | Src | $\epsilon$ | Src |
|------------------|------------------|-----|--------|----------------------------|------------|--------------|------------|----------------------------------------------|-----|----------------------------------------------------|-----|--------------|-----|--------------|-----|--------------|-----|------------|-----|
| 238              | 201              | C   | L3301b | propane-1,2,3-triol        | 56-81-5    | 1.0          | 308.0      | -                                            | -   | 85.80                                              | 114 | 291.35       | 120 | 563.15       | 121 | 850.00       | 121 | 46.53      | 120 |
| 239              | 202              | C   | L4302a | butane-1,2,4-triol         | 3068-00-6  | 1.0          | 298.15     | 1184.00                                      | 115 | -                                                  | -   | -            | -   | -            | -   | 697.00       | 121 | (39.02)    | -   |
| 240              | 203              | C   | L5303a | pentane-1,3,5-triol        | 4328-94-3  | 1.0          | 298.15     | 1103.60                                      | 115 | -                                                  | -   | -            | -   | 460.64       | 121 | -            | -   | (39.02)    | -   |
| 241              | 204              | C   | L6306a | hexane-1,3,6-triol         | 18990-98-2 | 1.0          | 293.15     | 1104.10                                      | 115 | -                                                  | -   | -            | -   | -            | -   | -            | -   | (31.50)    | -   |
| 242              | 205              | C   | L6307a | hexane-1,2,6-triol         | 106-69-4   | 1.0          | 298.15     | 1099.98                                      | 115 | -                                                  | -   | -            | -   | 472.47       | 121 | -            | -   | 31.5       | 120 |
| 243              | 206              | C   | C1201a | formic acid                | 64-18-6    | 1.0          | 298.15     | 1213.6                                       | 117 | 46.3                                               | 114 | 281.45       | 120 | 373.71       | 121 | 588.00       | 121 | 51.1       | 120 |
| 244              | 207              | C   | C2201a | acetic acid                | 64-19-7    | 1.01         | 298.15     | 1043.50                                      | 118 | 50.30                                              | 114 | 290.15       | 120 | 391.05       | 121 | 591.95       | 121 | 6.20       | 120 |
| 245              | 208              | C   | C3201a | propanoic acid             | 79-09-4    | 1.01         | 298.15     | 988.10                                       | 118 | 54.90                                              | 114 | 252.65       | 120 | 414.32       | 121 | 600.81       | 121 | 3.44       | 120 |
| 246              | 209              | C   | C4201a | 2-methylpropanoic acid     | 79-31-2    | 1.0          | 298.15     | 943.89                                       | 117 | 56.30                                              | 114 | 227.15       | 120 | 427.55       | 120 | -            | -   | 2.58       | 120 |
| 247              | 210              | C   | C4202a | butanoic acid              | 107-92-6   | 1.0          | 298.15     | 952.94                                       | 117 | 58.20                                              | 114 | 268.03       | 120 | 436.85       | 120 | 615.70       | 121 | 2.98       | 120 |
| 248              | 211              | C   | C5201a | 2,2-dimethylpropanoic acid | 75-98-9    | 1.0          | 309.82     | 907.45                                       | 117 | -                                                  | -   | 309.15       | 120 | 436.95       | 121 | 630.95       | 121 | (2.66)     | -   |
| 249              | 211              | C   | C5201b | 2,2-dimethylpropanoic acid | 75-98-9    | 1.0          | 320.0      | -                                            | -   | 57.60                                              | 114 | 309.15       | 120 | 436.95       | 121 | 630.95       | 121 | (2.66)     | -   |
| 250              | 212              | C   | C5202a | 2-methylbutanoic acid      | 116-53-0   | 1.0          | 298.15     | 934.70                                       | 117 | -                                                  | -   | -            | -   | 450.15       | 120 | 630.95       | 121 | (2.66)     | -   |
| 251              | 213              | C   | C5203a | 3-methylbutanoic acid      | 503-74-2   | 1.0          | 298.15     | 924.06                                       | 117 | 61.20                                              | 114 | 243.55       | 120 | 448.25       | 121 | 629.09       | 121 | (2.66)     | -   |
| 252              | 214              | C   | C5204a | pentanoic acid             | 109-52-4   | 1.0          | 298.15     | 934.40                                       | 117 | 63.00                                              | 114 | 239.52       | 120 | 458.65       | 121 | 639.16       | 121 | 2.661      | 120 |
| 253              | 215              | C   | C6201a | 2,2-dimethylbutanoic acid  | 595-37-9   | 1.0          | 293.15     | 927.47                                       | 117 | -                                                  | -   | 258.15       | 120 | 459.15       | 121 | 654.61       | 121 | (2.72)     | -   |
| 254              | 215              | C   | C6201b | 2,2-dimethylbutanoic acid  | 595-37-9   | 1.0          | 370.0      | -                                            | -   | 59.40                                              | 114 | 258.15       | 120 | 459.15       | 121 | 654.61       | 121 | (2.72)     | -   |
| 255              | 216              | C   | C6202a | 3,3-dimethylbutanoic acid  | 1070-83-3  | 1.0          | 298.05     | 908.00                                       | 117 | 64.00                                              | 114 | 279.15       | 120 | 457.15       | 120 | 654.61       | 121 | 2.85       | 120 |
| 256              | 217              | C   | C6203a | 2,3-dimethylbutanoic acid  | 14287-61-7 | 1.0          | 293.15     | 927.45                                       | 117 | -                                                  | -   | -            | -   | 464.85       | 121 | 654.61       | 121 | (2.72)     | -   |
| 257              | 218              | C   | C6204a | 2-ethylbutanoic acid       | 88-09-5    | 1.0          | 298.15     | 923.50                                       | 117 | -                                                  | -   | 241.35       | 120 | 466.15       | 120 | 654.61       | 121 | 2.72       | 120 |
| 258              | 218              | C   | C6204b | 2-ethylbutanoic acid       | 88-09-5    | 1.0          | 388.0      | -                                            | -   | 58.20                                              | 114 | 241.35       | 120 | 466.15       | 120 | 654.61       | 121 | 2.72       | 120 |
| 259              | 219              | C   | C6205a | 2-methylpentanoic acid     | 97-61-0    | 1.0          | 298.15     | 918.22                                       | 117 | -                                                  | -   | -            | -   | -            | -   | 654.61       | 121 | (2.72)     | -   |
| 260              | 220              | C   | C6206a | 3-methylpentanoic acid     | 105-43-1   | 1.0          | 298.15     | 923.00                                       | 117 | 105.43-1                                           | -   | -            | -   | -            | -   | 654.61       | 121 | (2.72)     | -   |
| 261              | 221              | C   | C6207a | 4-methylpentanoic acid     | 646-07-1   | 1.0          | 298.15     | 917.00                                       | 117 | -                                                  | -   | 240.15       | 120 | 473.65       | 121 | 654.61       | 121 | (2.72)     | -   |
| 262              | 221              | C   | C6207b | 4-methylpentanoic acid     | 646-07-1   | 1.0          | 354.0      | -                                            | -   | 91.70                                              | 114 | 240.15       | 120 | 473.65       | 121 | 654.61       | 121 | (2.72)     | -   |
| 263              | 222              | C   | C6208a | hexanoic acid              | 142-62-1   | 1.0          | 298.15     | 922.88                                       | 117 | 69.20                                              | 114 | 269.05       | 120 | 478.85       | 121 | 660.20       | 121 | 2.600      | 120 |
| 264              | 223              | C   | M1101a | methanamine                | 74-89-5    | 1.0          | 266.85     | 694.21                                       | 117 | 26.11                                              | 121 | 179.73       | 120 | 266.82       | 121 | 430.05       | 121 | 16.7       | 120 |
| 265              | 223              | C   | M1101b | methanamine                | 74-89-5    | 3.52         | 298.15     | 655.00                                       | 121 | -                                                  | -   | 179.73       | 120 | 266.82       | 121 | 430.05       | 121 | 16.7       | 120 |
| 266              | 224              | C   | M2101a | ethanamine                 | 75-04-7    | 1.0          | 288.15     | 688.56                                       | 117 | 27.35                                              | 121 | 192.15       | 120 | 289.73       | 121 | 456.15       | 121 | 8.7        | 120 |
| 267              | 225              | C   | M3101a | propan-2-amine             | 75-31-0    | 1.01         | 298.15     | 683.94                                       | 118 | 28.40                                              | 114 | 178.03       | 120 | 305.55       | 121 | 471.85       | 121 | 5.6268     | 120 |
| 268              | 226              | C   | M3102a | propan-1-amine             | 107-10-8   | 1.01         | 298.15     | 712.76                                       | 118 | 31.30                                              | 114 | 188.37       | 120 | 321.65       | 121 | 496.95       | 121 | 5.08       | 120 |
| 269              | 227              | C   | M4101a | 2-methylpropan-2-amine     | 75-64-9    | 1.0          | 298.15     | 690.07                                       | 117 | 29.60                                              | 114 | 206.23       | 120 | 317.55       | 121 | 483.90       | 121 | (4.71)     | -   |
| 270              | 228              | C   | M4102a | butan-2-amine              | 13952-84-6 | 1.01         | 298.15     | 717.81                                       | 118 | 32.60                                              | 114 | -            | -   | 336.15       | 121 | 514.30       | 121 | (4.71)     | -   |
| 271              | 229              | C   | M4103a | 2-methylpropan-1-amine     | 78-81-9    | 1.0          | 298.15     | 729.14                                       | 117 | 33.80                                              | 114 | 187.15       | 120 | 340.88       | 121 | 522.40       | 121 | (4.71)     | -   |
| 272              | 230              | C   | M4104a | butan-1-amine              | 109-73-9   | 1.0          | 298.15     | 736.83                                       | 117 | 35.60                                              | 114 | 224.15       | 120 | 350.55       | 121 | 531.90       | 121 | 4.71       | 120 |
| 273              | 231              | C   | M5101a | 2-methylbutan-2-amine      | 594-39-8   | 0.11         | 298.15     | 727.59                                       | 121 | 32.49                                              | 121 | 168.15       | 120 | 350.15       | 121 | 557.66       | 121 | (4.27)     | -   |
| 274              | 232              | C   | M5102a | 2,2-dimethylpropan-1-amine | 5813-64-9  | 0.1          | 298.15     | 728.07                                       | 121 | 33.38                                              | 121 | -            | -   | 350.15       | 121 | 557.66       | 121 | (4.27)     | -   |
| 275              | 233              | C   | M5103a | 3-methylbutan-2-amine      | 598-74-3   | 0.08         | 298.15     | 753.00                                       | 121 | 33.88                                              | 121 | 223.15       | 120 | 357.15       | 121 | 557.66       | 121 | (4.27)     | -   |
| 276              | 234              | C   | M5104a | pentan-3-amine             | 616-24-0   | 1.0          | 291.35     | 711.30                                       | 117 | -                                                  | -   | -            | -   | 362.15       | 121 | 557.66       | 121 | (4.27)     | -   |
| 277              | 234              | C   | M5104b | pentan-3-amine             | 616-24-0   | 0.06         | 298.15     | -                                            | -   | 34.61                                              | 121 | -            | -   | 362.15       | 121 | 557.66       | 121 | (4.27)     | -   |
| 278              | 235              | C   | M5105a | 2-methylbutan-1-amine      | 96-15-1    | 1.0          | 298.15     | 750.50                                       | 117 | -                                                  | -   | -            | -   | 368.65       | 121 | 557.66       | 121 | (4.27)     | -   |
| 279              | 235              | C   | M5105b | 2-methylbutan-1-amine      | 96-15-1    | 0.04         | 298.15     | -                                            | -   | 35.61                                              | 121 | -            | -   | 368.65       | 121 | 557.66       | 121 | (4.27)     | -   |
| 280              | 236              | C   | M5106a | pentan-2-amine             | 63493-28-7 | 0.05         | 298.15     | 735.70                                       | 121 | 34.82                                              | 121 | -            | -   | 364.85       | 121 | 557.66       | 121 | (4.27)     | -   |
| 281              | 237              | C   | M5107a | 3-methylbutan-1-amine      | 107-85-7   | 1.0          | 298.15     | 744.30                                       | 117 | -                                                  | -   | -            | -   | 370.15       | 121 | 557.66       | 121 | (4.27)     | -   |
| 282              | 237              | C   | M5107b | 3-methylbutan-1-amine      | 107-85-7   | 0.04         | 298.15     | -                                            | -   | 35.13                                              | 121 | -            | -   | 370.15       | 121 | 557.66       | 121 | (4.27)     | -   |
| 283              | 238              | C   | M5108a | pentan-1-amine             | 110-58-7   | 0.04         | 298.15     | 751.00                                       | 121 | -                                                  | -   | 222.15       | 120 | 377.65       | 121 | 557.66       | 121 | 4.27       | 120 |
| 284              | 238              | C   | M5108b | pentan-1-amine             | 110-58-7   | 1.0          | 298.0      | -                                            | -   | 40.10                                              | 114 | 222.15       | 120 | 377.65       | 121 | 557.66       | 121 | 4.27       | 120 |
| 285              | 239              | C   | M6101a | 2,3-dimethylbutan-2-amine  | 4358-75-2  | 0.03         | 298.15     | 760.06                                       | 121 | -                                                  | -   | -            | -   | 377.65       | 121 | 589.15       | 121 | (4.08)     | -   |

Table S.1 – Reference experimental data (continued)

| $n_{sim}$ | $n_{iso}$ | Set | Code   | Name                           | CAS        | $P$<br>[bar] | $T$<br>[K] | $\rho_{liq}$<br>[kg·m <sup>-3</sup> ] | Src | $\Delta H_{vap}$<br>[kJ·mol <sup>-1</sup> ] | Src | $T_m$<br>[K] | Src | $T_b$<br>[K] | Src | $T_c$<br>[K] | Src | $\epsilon$ | Src |
|-----------|-----------|-----|--------|--------------------------------|------------|--------------|------------|---------------------------------------|-----|---------------------------------------------|-----|--------------|-----|--------------|-----|--------------|-----|------------|-----|
| 286       | 240       | C   | M6102a | 3,3-dimethylbutan-2-amine      | 3850-30-4  | 0.04         | 298.15     | 760.06                                | 121 | 36.13                                       | 121 | 253.15       | 120 | 375.15       | 121 | 589.15       | 121 | (4.08)     | -   |
| 287       | 241       | C   | M6103a | 3-methylpentan-3-amine         | 3495-46-3  | 0.01         | 300.86     | 757.89                                | 121 | -                                           | -   | -            | -   | 398.45       | 121 | 589.15       | 121 | (4.08)     | -   |
| 288       | 242       | C   | M6104a | 2,2-dimethylbutan-1-amine      | 41781-17-3 | 0.02         | 298.15     | 760.06                                | 121 | -                                           | -   | -            | -   | 386.65       | 121 | 589.15       | 121 | (4.08)     | -   |
| 289       | 243       | C   | M6105a | 2-methylpentan-2-amine         | 53310-02-4 | 0.03         | 298.15     | 743.00                                | 121 | 36.13                                       | 121 | -            | -   | 377.15       | 121 | 589.15       | 121 | (4.08)     | -   |
| 290       | 244       | C   | M6106a | 3,3-dimethylbutan-1-amine      | 15673-00-4 | 0.01         | 306.83     | 753.09                                | 121 | -                                           | -   | -            | -   | 405.98       | 121 | 589.15       | 121 | (4.08)     | -   |
| 291       | 245       | C   | M6107a | 2-methylpentan-3-amine         | 54287-41-1 | 0.01         | 308.71     | 741.67                                | 121 | -                                           | -   | -            | -   | 408.33       | 121 | 589.15       | 121 | (4.08)     | -   |
| 292       | 246       | C   | M6108a | 3-methylpentan-2-amine         | 35399-81-6 | 0.01         | 308.71     | 741.67                                | 121 | -                                           | -   | -            | -   | 408.33       | 121 | 589.15       | 121 | (4.08)     | -   |
| 293       | 247       | C   | M6109a | 2,3-dimethylbutan-1-amine      | 66553-05-7 | 0.03         | 298.15     | 752.75                                | 121 | -                                           | -   | -            | -   | 378.15       | 121 | 589.15       | 121 | (4.08)     | -   |
| 294       | 248       | C   | M6110a | 4-methylpentan-2-amine         | 108-09-8   | 0.02         | 298.15     | 745.70                                | 121 | 37.37                                       | 121 | -            | -   | 381.65       | 121 | 589.15       | 121 | (4.08)     | -   |
| 295       | 249       | C   | M6111a | 2-ethylbutan-1-amine           | 617-79-8   | 0.01         | 309.07     | 751.27                                | 121 | -                                           | -   | 398.15       | 120 | 408.77       | 121 | 589.15       | 121 | (4.08)     | -   |
| 296       | 250       | C   | M6112a | hexan-3-amine                  | 16751-58-9 | 0.01         | 309.07     | 761.11                                | 121 | -                                           | -   | -            | -   | 408.77       | 121 | 589.15       | 121 | (4.08)     | -   |
| 297       | 251       | C   | M6113a | 2-methylpentan-1-amine         | 13364-16-4 | 0.01         | 302.05     | 759.81                                | 121 | -                                           | -   | -            | -   | 400.00       | 121 | 589.15       | 121 | (4.08)     | -   |
| 298       | 252       | C   | M6114a | 3-methylpentan-1-amine         | 42245-37-4 | 0.01         | 298.15     | 767.00                                | 121 | -                                           | -   | -            | -   | 395.15       | 121 | 589.15       | 121 | (4.08)     | -   |
| 299       | 253       | C   | M6115a | hexan-2-amine                  | 5329-79-3  | 0.01         | 305.93     | 756.67                                | 121 | 38.22                                       | 121 | -            | -   | 403.15       | 121 | 589.15       | 121 | (4.08)     | -   |
| 300       | 254       | C   | M6116a | 4-methylpentan-1-amine         | 5344-20-7  | 0.01         | 301.25     | 767.49                                | 121 | 39.81                                       | 121 | -            | -   | 397.05       | 121 | 589.15       | 121 | (4.08)     | -   |
| 301       | 255       | C   | M6117a | hexan-1-amine                  | 111-26-2   | 1.0          | 298.15     | 762.99                                | 117 | 45.00                                       | 114 | 252.15       | 120 | 404.65       | 121 | 589.15       | 121 | 4.08       | 120 |
| 302       | 256       | C   | N2101a | N-methylmethanamine            | 124-40-3   | 1.0          | 282.82     | 667.93                                | 117 | 27.20                                       | 114 | 180.15       | 120 | 280.03       | 121 | 437.20       | 121 | (3.12)     | -   |
| 303       | 256       | C   | N2101b | N-methylmethanamine            | 124-40-3   | 1.96         | 298.15     | 649.96                                | 121 | -                                           | -   | 180.15       | 120 | 280.03       | 121 | 437.20       | 121 | (3.12)     | -   |
| 304       | 257       | C   | N3101a | N-methylethanamine             | 624-78-2   | 0.65         | 298.15     | 684.00                                | 121 | 26.66                                       | 121 | -            | -   | 309.15       | 121 | 475.00       | 121 | (3.12)     | -   |
| 305       | 258       | C   | N4101a | N-methylpropan-2-amine         | 4747-21-1  | 1.0          | 288.15     | 740.00                                | 117 | 30.70                                       | 114 | -            | -   | 323.55       | 121 | 482.40       | 121 | (3.68)     | -   |
| 306       | 259       | C   | N4102a | N-ethylethanamine              | 109-89-7   | 1.0          | 298.15     | 701.20                                | 117 | 31.20                                       | 114 | 223.15       | 120 | 328.60       | 121 | 496.60       | 121 | 3.680      | 120 |
| 307       | 260       | C   | N4103a | N-methylpropan-1-amine         | 627-35-0   | 0.2          | 298.15     | 711.93                                | 121 | 31.15                                       | 121 | -            | -   | 336.15       | 121 | 482.40       | 121 | (3.68)     | -   |
| 308       | 261       | C   | N5101a | N,2-dimethylpropan-2-amine     | 14610-37-8 | 1.0          | 298.15     | 727.00                                | 117 | 32.30                                       | 114 | -            | -   | 350.15       | 121 | 517.66       | 121 | (3.12)     | -   |
| 309       | 262       | C   | N5102a | N-methylbutan-2-amine          | 7713-69-1  | 0.1          | 298.15     | 719.96                                | 121 | 33.32                                       | 121 | -            | -   | 351.65       | 121 | 517.66       | 121 | (3.12)     | -   |
| 310       | 263       | C   | N5103a | N,2-dimethylpropan-1-amine     | 625-43-4   | 0.12         | 298.15     | 729.96                                | 121 | -                                           | -   | -            | -   | 346.15       | 121 | 517.66       | 121 | (3.12)     | -   |
| 311       | 264       | C   | N5104a | N-ethylpropan-2-amine          | 19961-27-4 | 0.13         | 298.15     | 719.96                                | 121 | -                                           | -   | -            | -   | 349.15       | 121 | 517.66       | 121 | (3.12)     | -   |
| 312       | 264       | C   | N5104b | N-ethylpropan-2-amine          | 19961-27-4 | 1.0          | 298.0      | -                                     | -   | 33.10                                       | 114 | -            | -   | 349.15       | 121 | 517.66       | 121 | (3.12)     | -   |
| 313       | 265       | C   | N5105a | N-ethylpropan-1-amine          | 20193-20-8 | 0.11         | 298.15     | 726.66                                | 121 | 31.88                                       | 121 | -            | -   | 353.45       | 121 | 517.66       | 121 | (3.12)     | -   |
| 314       | 266       | C   | N5106a | N-methylbutan-1-amine          | 110-68-9   | 0.05         | 298.15     | 728.09                                | 121 | -                                           | -   | -            | -   | 364.25       | 121 | 517.66       | 121 | (3.12)     | -   |
| 315       | 266       | C   | N5106b | N-methylbutan-1-amine          | 110-68-9   | 1.0          | 298.0      | -                                     | -   | 38.10                                       | 114 | -            | -   | 364.25       | 121 | 517.66       | 121 | (3.12)     | -   |
| 316       | 267       | C   | N6101a | N,2,2-trimethylpropan-1-amine  | 26153-91-3 | 0.02         | 298.15     | 740.06                                | 121 | -                                           | -   | -            | -   | 383.62       | 121 | 549.15       | 121 | (2.92)     | -   |
| 317       | 268       | C   | N6102a | N-ethyl-2-methylpropan-2-amine | 4432-77-3  | 1.0          | 298.15     | 716.10                                | 117 | -                                           | -   | -            | -   | 351.15       | 121 | 549.15       | 121 | (2.92)     | -   |
| 318       | 268       | C   | N6102b | N-ethyl-2-methylpropan-2-amine | 4432-77-3  | 0.1          | 298.15     | -                                     | -   | 34.09                                       | 121 | -            | -   | 351.15       | 121 | 549.15       | 121 | (2.92)     | -   |
| 319       | 269       | C   | N6103a | N,3-dimethylbutan-2-amine      | 34317-39-0 | 0.02         | 298.15     | 740.06                                | 121 | -                                           | -   | -            | -   | 386.41       | 121 | 549.15       | 121 | (2.92)     | -   |
| 320       | 270       | C   | N6104a | N-propan-2-ylpropan-2-amine    | 108-18-9   | 1.0          | 298.15     | 712.27                                | 117 | 34.50                                       | 114 | 212.15       | 120 | 357.05       | 121 | 523.10       | 121 | (2.92)     | -   |
| 321       | 271       | C   | N6105a | N-methylpentan-3-amine         | 52317-98-3 | 0.03         | 298.15     | 740.06                                | 121 | 37.35                                       | 121 | -            | -   | 381.15       | 121 | 549.15       | 121 | (2.92)     | -   |
| 322       | 272       | C   | N6106a | N-ethylbutan-2-amine           | 21035-44-9 | 0.04         | 298.15     | 729.77                                | 121 | -                                           | -   | -            | -   | 371.15       | 121 | 549.15       | 121 | (2.92)     | -   |
| 323       | 272       | C   | N6106b | N-ethylbutan-2-amine           | 21035-44-9 | 1.0          | 298.0      | -                                     | -   | 37.90                                       | 114 | -            | -   | 371.15       | 121 | 549.15       | 121 | (2.92)     | -   |
| 324       | 273       | C   | N6107a | N-propan-2-ylpropan-1-amine    | 21968-17-2 | 0.04         | 298.15     | 723.16                                | 121 | -                                           | -   | -            | -   | 371.45       | 121 | 549.15       | 121 | (2.92)     | -   |
| 325       | 273       | C   | N6107b | N-propan-2-ylpropan-1-amine    | 21968-17-2 | 1.0          | 298.0      | -                                     | -   | 37.30                                       | 114 | -            | -   | 371.45       | 121 | 549.15       | 121 | (2.92)     | -   |
| 326       | 274       | C   | N6108a | N,2-dimethylbutan-1-amine      | 51932-19-5 | 0.02         | 298.15     | 740.06                                | 121 | -                                           | -   | -            | -   | 386.41       | 121 | 549.15       | 121 | (2.92)     | -   |
| 327       | 275       | C   | N6109a | N-ethyl-2-methylpropan-1-amine | 13205-60-2 | 0.04         | 298.15     | 730.04                                | 121 | 36.13                                       | 121 | -            | -   | 371.15       | 121 | 549.15       | 121 | (2.92)     | -   |
| 328       | 276       | C   | N6110a | N,3-dimethylbutan-1-amine      | 4104-44-3  | 1.0          | 295.15     | 739.00                                | 117 | -                                           | -   | -            | -   | -            | -   | -            | -   | (2.92)     | -   |
| 329       | 277       | C   | N6111a | N-propylpropan-1-amine         | 142-84-7   | 1.0          | 298.15     | 734.90                                | 117 | 40.00                                       | 114 | 210.15       | 120 | 382.00       | 121 | 550.00       | 121 | 2.923      | 120 |
| 330       | 278       | C   | N6112a | N-ethylbutan-1-amine           | 13360-63-9 | 0.02         | 298.15     | 735.42                                | 121 | -                                           | -   | -            | -   | 381.15       | 121 | 549.15       | 121 | (2.92)     | -   |
| 331       | 278       | C   | N6112b | N-ethylbutan-1-amine           | 13360-63-9 | 1.0          | 298.0      | -                                     | -   | 40.20                                       | 114 | -            | -   | 381.15       | 121 | 549.15       | 121 | (2.92)     | -   |
| 332       | 279       | C   | N6113a | N-methylpentan-1-amine         | 25419-06-1 | 0.02         | 298.15     | 743.01                                | 121 | 39.93                                       | 121 | -            | -   | 390.55       | 121 | 549.15       | 121 | (2.92)     | -   |
| 333       | 280       | C   | R3101a | N,N-dimethylmethanamine        | 75-50-3    | 1.0          | 273.15     | 655.70                                | 117 | 22.91                                       | 121 | 156.05       | 120 | 276.02       | 121 | 433.25       | 121 | 2.440      | 120 |

Table S.1 – Reference experimental data (continued)

| $n_{sim}$ | $n_{iso}$ | Set | Code   | Name                                     | CAS        | $P$   | $T$    | $\rho_{liq}$                      | Src | $\Delta H_{vap}$                    | Src | $T_m$  | Src | $T_b$  | Src | $T_c$  | Src | $\epsilon$ | Src |
|-----------|-----------|-----|--------|------------------------------------------|------------|-------|--------|-----------------------------------|-----|-------------------------------------|-----|--------|-----|--------|-----|--------|-----|------------|-----|
|           |           |     |        |                                          |            | [bar] | [K]    | [ $\text{kg}\cdot\text{m}^{-3}$ ] |     | [ $\text{kJ}\cdot\text{mol}^{-1}$ ] |     | [K]    |     | [K]    |     |        |     |            |     |
| 334       | 280       | C   | R3101b | N,N-dimethylmethanamine                  | 75-50-3    | 2.33  | 298.15 | 628.94                            | 121 | -                                   | -   | 156.05 | 120 | 276.02 | 121 | 433.25 | 121 | 2.440      | 120 |
| 335       | 281       | C   | R4101a | N,N-dimethylethanamine                   | 598-56-1   | 1.0   | 298.15 | 669.40                            | 117 | -                                   | -   | 133.15 | 120 | 310.15 | 121 | 500.00 | 121 | (2.41)     | -   |
| 336       | 281       | C   | R4101b | N,N-dimethylethanamine                   | 598-56-1   | 0.67  | 298.15 | -                                 | -   | 26.68                               | 121 | 133.15 | 120 | 310.15 | 121 | 500.00 | 121 | (2.41)     | -   |
| 337       | 282       | C   | R5101a | N,N-dimethylpropan-2-amine               | 996-35-0   | 1.0   | 298.15 | 710.60                            | 117 | 31.90                               | 114 | -      | -   | 339.18 | 121 | 517.66 | 121 | (2.41)     | -   |
| 338       | 283       | C   | R5102a | N-ethyl-N-methylethanamine               | 616-39-7   | 1.0   | 298.15 | 701.55                            | 117 | 31.80                               | 114 | 77.15  | 120 | 339.15 | 121 | 517.66 | 121 | (2.41)     | -   |
| 339       | 284       | C   | R5103a | N,N-dimethylpropan-1-amine               | 926-63-6   | 0.21  | 298.15 | 695.57                            | 121 | 31.14                               | 121 | -      | -   | 339.15 | 121 | 517.66 | 121 | (2.41)     | -   |
| 340       | 285       | C   | R6101a | N,N,2-trimethylpropan-2-amine            | 918-02-5   | 1.0   | 298.15 | 737.60                            | 117 | 34.80                               | 114 | -      | -   | 363.15 | 121 | 549.15 | 121 | (2.42)     | -   |
| 341       | 286       | C   | R6102a | N,N-dimethylbutan-2-amine                | 921-04-0   | 0.05  | 298.15 | 733.93                            | 121 | 35.36                               | 121 | -      | -   | 367.15 | 121 | 549.15 | 121 | (2.42)     | -   |
| 342       | 287       | C   | R6103a | N-ethyl-N-methylpropan-2-amine           | 39198-07-7 | 0.06  | 298.15 | 721.46                            | 121 | 35.05                               | 121 | -      | -   | 364.65 | 121 | 549.15 | 121 | (2.42)     | -   |
| 343       | 288       | C   | R6104a | N,N,2-trimethylpropan-1-amine            | 7239-24-9  | 0.1   | 298.15 | 719.96                            | 121 | 33.08                               | 121 | -      | -   | 354.15 | 121 | 549.15 | 121 | (2.42)     | -   |
| 344       | 289       | C   | R6105a | N,N-diethylethanamine                    | 121-44-8   | 1.01  | 298.15 | 723.01                            | 118 | -                                   | -   | 158.45 | 120 | 361.92 | 121 | 535.15 | 121 | 2.418      | 120 |
| 345       | 289       | C   | R6105b | N,N-diethylethanamine                    | 121-44-8   | 0.06  | 298.15 | -                                 | -   | 34.91                               | 121 | 158.45 | 120 | 361.92 | 121 | 535.15 | 121 | 2.418      | 120 |
| 346       | 290       | C   | R6106a | N-ethyl-N-methylpropan-1-amine           | 4458-32-6  | 0.06  | 298.15 | 718.00                            | 121 | 35.05                               | 121 | -      | -   | 364.65 | 121 | 549.15 | 121 | (2.42)     | -   |
| 347       | 291       | C   | R6107a | N,N-dimethylbutan-1-amine                | 927-62-8   | 0.06  | 298.15 | 716.01                            | 121 | 35.29                               | 121 | -      | -   | 367.15 | 121 | 549.15 | 121 | (2.42)     | -   |
| 348       | 292       | C   | N2201a | ethane-1,2-diamine                       | 107-15-3   | 0.02  | 298.15 | 892.82                            | 121 | -                                   | -   | 284.29 | 120 | 390.41 | 121 | 593.00 | 121 | 13.82      | 120 |
| 349       | 292       | C   | N2201b | ethane-1,2-diamine                       | 107-15-3   | 1.0   | 298.0  | -                                 | -   | 45.00                               | 114 | 284.29 | 120 | 390.41 | 121 | 593.00 | 121 | 13.82      | 120 |
| 350       | 293       | C   | N3201a | N'-methylethane-1,2-diamine              | 109-81-9   | 1.0   | 298.15 | 841.00                            | 120 | -                                   | -   | -      | -   | 388.15 | 121 | -      | -   | (13.82)    | -   |
| 351       | 293       | C   | N3201b | N'-methylethane-1,2-diamine              | 109-81-9   | 1.0   | 388.15 | -                                 | -   | 33.25                               | 121 | -      | -   | 388.15 | 121 | -      | -   | (13.82)    | -   |
| 352       | 294       | C   | N3202a | propane-1,2-diamine                      | 78-90-0    | 0.02  | 298.15 | 856.00                            | 121 | -                                   | -   | -      | -   | 392.45 | 121 | 585.03 | 121 | (13.82)    | -   |
| 353       | 294       | C   | N3202b | propane-1,2-diamine                      | 78-90-0    | 1.0   | 298.0  | -                                 | -   | 44.20                               | 114 | -      | -   | 392.45 | 121 | 585.03 | 121 | (13.82)    | -   |
| 354       | 295       | C   | N3203a | propane-1,3-diamine                      | 109-76-2   | 1.0   | 298.15 | 884.00                            | 120 | 50.20                               | 114 | 262.25 | 120 | 412.95 | 121 | 608.00 | 121 | (13.82)    | -   |
| 355       | 296       | C   | N4201a | N',N'-dimethylethane-1,2-diamine         | 108-00-9   | 1.0   | 298.15 | 803.00                            | 120 | -                                   | -   | -      | -   | 378.65 | 121 | -      | -   | (13.82)    | -   |
| 356       | 296       | C   | N4201b | N',N'-dimethylethane-1,2-diamine         | 108-00-9   | 1.0   | 378.65 | -                                 | -   | 31.11                               | 121 | -      | -   | 378.65 | 121 | -      | -   | (13.82)    | -   |
| 357       | 297       | C   | N4202a | N,N'-dimethylethane-1,2-diamine          | 110-70-3   | 1.0   | 288.15 | 828.00                            | 120 | -                                   | -   | -      | -   | 393.15 | 121 | -      | -   | (13.82)    | -   |
| 358       | 297       | C   | N4202b | N,N'-dimethylethane-1,2-diamine          | 110-70-3   | 1.0   | 393.15 | -                                 | -   | 34.96                               | 121 | -      | -   | 393.15 | 121 | -      | -   | (13.82)    | -   |
| 359       | 298       | C   | N4203a | 2-methylpropane-1,2-diamine              | 811-93-8   | 1.0   | 298.15 | 841.00                            | 120 | 45.80                               | 114 | -      | -   | 396.15 | 121 | -      | -   | (13.82)    | -   |
| 360       | 299       | C   | N4204a | N'-ethylethane-1,2-diamine               | 110-72-5   | 1.0   | 298.15 | 837.00                            | 120 | -                                   | -   | -      | -   | 402.15 | 121 | -      | -   | (13.82)    | -   |
| 361       | 299       | C   | N4204b | N'-ethylethane-1,2-diamine               | 110-72-5   | 1.0   | 373.0  | -                                 | -   | 43.00                               | 114 | -      | -   | 402.15 | 121 | -      | -   | (13.82)    | -   |
| 362       | 300       | C   | N4205a | N'-methylpropane-1,3-diamine             | 6291-84-5  | 1.0   | 298.0  | -                                 | -   | 53.10                               | 114 | -      | -   | 413.15 | 121 | -      | -   | (13.82)    | -   |
| 363       | 301       | C   | N4206a | butane-1,2-diamine                       | 4426-48-6  | 1.0   | 298.0  | -                                 | -   | 46.90                               | 114 | -      | -   | -      | -   | -      | -   | (13.82)    | -   |
| 364       | 302       | C   | N4207a | butane-1,3-diamine                       | 590-88-5   | 1.0   | 419.15 | -                                 | -   | 43.72                               | 121 | -      | -   | 419.15 | 121 | -      | -   | (13.82)    | -   |
| 365       | 303       | C   | N4208a | butane-1,4-diamine                       | 110-60-1   | 1.0   | 298.15 | 877.00                            | 120 | 55.20                               | 114 | 295.05 | 120 | 431.65 | 121 | -      | -   | (13.82)    | -   |
| 366       | 304       | C   | N5201a | N,N,N',N'-tetramethylmethanediamine      | 51-80-9    | 1.0   | 291.15 | 749.10                            | 120 | -                                   | -   | -      | -   | 356.15 | 121 | -      | -   | (13.82)    | -   |
| 367       | 304       | C   | N5201b | N,N,N',N'-tetramethylmethanediamine      | 51-80-9    | 1.0   | 298.0  | -                                 | -   | 33.10                               | 114 | -      | -   | 356.15 | 121 | -      | -   | (13.82)    | -   |
| 368       | 305       | C   | N5202a | N,N',N'-trimethylethane-1,2-diamine      | 142-25-6   | 1.0   | 390.15 | -                                 | -   | 29.68                               | 121 | -      | -   | 390.15 | 121 | -      | -   | (13.82)    | -   |
| 369       | 306       | C   | N5203a | N',N'-dimethylpropane-1,3-diamine        | 109-55-7   | 1.0   | 293.15 | 827.20                            | 120 | 42.20                               | 114 | -      | -   | 406.65 | 121 | -      | -   | (13.82)    | -   |
| 370       | 307       | C   | N5204a | N,N'-dimethylpropane-1,3-diamine         | 111-33-1   | 1.0   | 418.15 | -                                 | -   | 36.90                               | 121 | -      | -   | 418.15 | 121 | -      | -   | (13.82)    | -   |
| 371       | 308       | C   | N5205a | N'-propan-2-ylethane-1,2-diamine         | 19522-67-9 | 1.0   | 409.15 | -                                 | -   | 34.34                               | 121 | -      | -   | 409.15 | 121 | -      | -   | (13.82)    | -   |
| 372       | 309       | C   | N5206a | 2,2-dimethylpropane-1,3-diamine          | 7328-91-8  | 1.0   | 426.15 | -                                 | -   | 39.41                               | 121 | -      | -   | 426.15 | 121 | -      | -   | (13.82)    | -   |
| 373       | 310       | C   | N5207a | N'-propylethane-1,2-diamine              | 111-39-7   | 1.0   | 421.65 | -                                 | -   | 37.97                               | 121 | -      | -   | 421.65 | 121 | -      | -   | (13.82)    | -   |
| 374       | 311       | C   | N5208a | pentane-1,3-diamine                      | 589-37-7   | 1.0   | 298.0  | -                                 | -   | 54.90                               | 114 | -      | -   | 437.15 | 121 | -      | -   | (13.82)    | -   |
| 375       | 312       | C   | N5209a | pentane-1,5-diamine                      | 462-94-2   | 1.0   | 298.15 | 873.00                            | 120 | 58.70                               | 114 | 284.95 | 120 | 452.15 | 121 | -      | -   | (13.82)    | -   |
| 376       | 313       | C   | N6201a | N,N,N',N'-tetramethylethane-1,2-diamine  | 110-18-9   | 1.0   | 298.15 | 770.00                            | 120 | 41.40                               | 114 | 215.15 | 120 | 394.15 | 121 | -      | -   | (13.82)    | -   |
| 377       | 314       | C   | N6202a | N-ethyl-N',N'-dimethylethane-1,2-diamine | 123-83-1   | 1.0   | 298.15 | 738.00                            | 120 | -                                   | -   | -      | -   | 407.65 | 121 | -      | -   | (13.82)    | -   |
| 378       | 314       | C   | N6202b | N-ethyl-N',N'-dimethylethane-1,2-diamine | 123-83-1   | 1.0   | 407.65 | -                                 | -   | 35.09                               | 121 | -      | -   | 407.65 | 121 | -      | -   | (13.82)    | -   |
| 379       | 315       | C   | N6203a | N,N',N'-trimethylpropane-1,3-diamine     | 4543-96-8  | 1.0   | 414.15 | -                                 | -   | 30.57                               | 121 | -      | -   | 414.15 | 121 | -      | -   | (13.82)    | -   |
| 380       | 316       | C   | N6205a | N',N'-diethylethane-1,2-diamine          | 100-36-7   | 1.0   | 293.15 | 828.00                            | 120 | 45.80                               | 114 | -      | -   | 417.15 | 121 | -      | -   | (13.82)    | -   |
| 381       | 317       | C   | N6206a | N,N'-diethylethane-1,2-diamine           | 111-74-0   | 1.0   | 293.15 | 828.00                            | 120 | -                                   | -   | -      | -   | 419.15 | 121 | -      | -   | (13.82)    | -   |

Table S.1 – Reference experimental data (continued)

| $n_{sim}$ | $n_{iso}$ | Set | Code   | Name                                         | CAS        | $P$<br>[bar] | $T$<br>[K] | $\rho_{liq}$<br>[kg·m <sup>-3</sup> ] | Src | $\Delta H_{vap}$<br>[kJ·mol <sup>-1</sup> ] | Src | $T_m$<br>[K] | Src | $T_b$<br>[K] | Src | $T_c$<br>[K] | Src | $\epsilon$ | Src |
|-----------|-----------|-----|--------|----------------------------------------------|------------|--------------|------------|---------------------------------------|-----|---------------------------------------------|-----|--------------|-----|--------------|-----|--------------|-----|------------|-----|
| 382       | 317       | C   | N6206b | N,N'-diethylethane-1,2-diamine               | 111-74-0   | 1.0          | 419.15     | -                                     | -   | 31.73                                       | 121 | -            | -   | 419.15       | 121 | -            | -   | (13.82)    | -   |
| 383       | 318       | C   | N6207a | N'-propan-2-ylpropane-1,3-diamine            | 3360-16-5  | 1.0          | 435.15     | -                                     | -   | 35.84                                       | 121 | -            | -   | 435.15       | 121 | -            | -   | (13.82)    | -   |
| 384       | 319       | C   | N6208a | N'-propylpropane-1,3-diamine                 | 23764-31-0 | 1.0          | 442.15     | -                                     | -   | 37.88                                       | 121 | -            | -   | 442.15       | 121 | -            | -   | (13.82)    | -   |
| 385       | 320       | C   | N6209a | N'-butylethane-1,2-diamine                   | 19522-69-1 | 1.0          | 431.15     | -                                     | -   | 34.75                                       | 121 | -            | -   | 431.15       | 121 | -            | -   | (13.82)    | -   |
| 386       | 321       | C   | N6210a | 2-methylpentane-1,5-diamine                  | 15520-10-2 | 1.0          | 298.0      | -                                     | -   | 60.90                                       | 114 | -            | -   | 466.15       | 121 | -            | -   | (13.82)    | -   |
| 387       | 322       | C   | N6211a | hexane-1,6-diamine                           | 124-09-4   | 1.0          | 298.0      | -                                     | -   | 63.10                                       | 114 | 311.95       | 120 | 475.04       | 121 | -            | -   | (13.82)    | -   |
| 388       | 323       | C   | D2401a | acetamide                                    | 60-35-5    | 0.004        | 354.2      | 1001.97                               | 121 | -                                           | -   | 353.31       | 120 | 494.3        | 121 | 761.00       | 121 | 67.6       | 120 |
| 389       | 323       | C   | D2401b | acetamide                                    | 60-35-5    | 1.0          | 396.0      | -                                     | -   | 63.80                                       | 114 | 353.31       | 120 | 494.3        | 121 | 761.00       | 121 | 67.6       | 120 |
| 390       | 324       | C   | D3401a | propanamide                                  | 79-05-0    | 1.01         | 355.65     | 963.20                                | 118 | -                                           | -   | 353.05       | 120 | 486.15       | 121 | -            | -   | (43.86)    | -   |
| 391       | 324       | C   | D3401b | propanamide                                  | 79-05-0    | 1.0          | 390.0      | -                                     | -   | 63.90                                       | 114 | 353.05       | 120 | 486.15       | 121 | -            | -   | (43.86)    | -   |
| 392       | 325       | C   | D4401a | butanamide                                   | 541-35-5   | 1.0          | 393.15     | 885.00                                | 120 | -                                           | -   | 389.15       | 120 | 489.15       | 121 | -            | -   | (43.86)    | -   |
| 393       | 326       | C   | D5402a | 3-methylbutanamide                           | 541-46-8   | 1.0          | 499.15     | -                                     | -   | 43.80                                       | 121 | 410.15       | 120 | 499.15       | 121 | -            | -   | (20.13)    | -   |
| 394       | 327       | C   | D5403a | pentanamide                                  | 626-97-1   | 1.0          | 383.15     | 873.50                                | 120 | -                                           | -   | 377.15       | 120 | 498.15       | 121 | -            | -   | (20.13)    | -   |
| 395       | 328       | C   | D6401a | hexanamide                                   | 628-02-4   | 1.0          | 528.15     | -                                     | -   | 46.59                                       | 121 | 374.15       | 120 | 528.15       | 121 | -            | -   | (43.86)    | -   |
| 396       | 329       | C   | D3301a | N-methylacetamide                            | 79-16-3    | 1.01         | 308.15     | 949.70                                | 118 | -                                           | -   | 303.75       | 120 | 478.15       | 121 | 718.00       | 121 | 179.0      | 120 |
| 397       | 329       | C   | D3301b | N-methylacetamide                            | 79-16-3    | 1.0          | 348.0      | -                                     | -   | 59.60                                       | 114 | 303.75       | 120 | 478.15       | 121 | 718.00       | 121 | 179.0      | 120 |
| 398       | 330       | C   | D4301a | N-methylpropanamide                          | 1187-58-2  | 1.0          | 298.15     | 930.50                                | 120 | 66.60                                       | 114 | 242.25       | 120 | 421.15       | 121 | -            | -   | 177.11     | 122 |
| 399       | 331       | C   | D4302a | N-ethylacetamide                             | 625-50-3   | 1.0          | 277.15     | 942.00                                | 120 | -                                           | -   | -            | -   | 478.15       | 121 | -            | -   | 129.0      | 122 |
| 400       | 331       | C   | D4302b | N-ethylacetamide                             | 625-50-3   | 1.0          | 298.0      | -                                     | -   | 64.90                                       | 114 | -            | -   | 478.15       | 121 | -            | -   | 129.0      | 122 |
| 401       | 332       | C   | D5301a | N,2-dimethylpropanamide                      | 2675-88-9  | 1.0          | 298.0      | -                                     | -   | 67.10                                       | 114 | -            | -   | -            | -   | -            | -   | (141.44)   | -   |
| 402       | 333       | C   | D5302a | N-propan-2-ylacetamide                       | 1118-69-0  | 1.0          | 298.0      | -                                     | -   | 66.40                                       | 114 | -            | -   | -            | -   | -            | -   | (141.44)   | -   |
| 403       | 334       | C   | D5303a | N-propylacetamide                            | 5331-48-6  | 1.0          | 298.0      | -                                     | -   | 69.80                                       | 114 | -            | -   | -            | -   | -            | -   | (141.44)   | -   |
| 404       | 335       | C   | D6303a | N-butylacetamide                             | 1119-49-9  | 1.0          | 298.15     | 896.00                                | 120 | 76.10                                       | 114 | -            | -   | 502.15       | 121 | 700.00       | 121 | 104.0      | 120 |
| 405       | 336       | C   | D4201a | N,N-dimethylacetamide                        | 127-19-5   | 1.01         | 298.15     | 936.70                                | 118 | 50.66                                       | 118 | 254.15       | 120 | 439.25       | 121 | 658.00       | 121 | 40.2       | 119 |
| 406       | 337       | C   | D5201a | N,N-dimethylpropanamide                      | 758-96-3   | 1.01         | 298.15     | 920.32                                | 118 | -                                           | -   | 228.15       | 120 | 444.65       | 121 | -            | -   | (35.30)    | -   |
| 407       | 338       | C   | D6202a | N,N-dimethylbutanamide                       | 760-79-2   | 1.0          | 298.15     | 906.40                                | 120 | -                                           | -   | 233.15       | 120 | 459.15       | 121 | -            | -   | (30.40)    | -   |
| 408       | 339       | C   | D6203a | N,N-diethylacetamide                         | 685-91-6   | 1.0          | 290.15     | 913.00                                | 120 | 53.70                                       | 118 | -            | -   | 458.65       | 121 | 700.00       | 121 | 30.4       | 122 |
| 409       | 340       | V   | O7101a | 2-methyl-2-propan-2-yloxypropane             | 17348-59-3 | 1.0          | 298.15     | 736.39                                | 116 | 34.50                                       | 114 | 184.85       | 120 | 378.66       | 121 | 549.68       | 121 | (3.78)     | -   |
| 410       | 341       | V   | O7102a | 2-ethoxy-2-methylbutane                      | 919-94-8   | 1.0          | 298.15     | 761.80                                | 116 | 38.20                                       | 114 | -            | -   | 375.15       | 121 | 546.00       | 121 | (3.78)     | -   |
| 411       | 342       | V   | O7103a | 2-methyl-2-propoxypropane                    | 29072-93-3 | 1.0          | 298.15     | 746.68                                | 116 | 37.20                                       | 114 | -            | -   | 373.15       | 121 | 549.68       | 121 | (3.78)     | -   |
| 412       | 343       | V   | O7104a | 2-methyl-1-propan-2-yloxypropane             | 78448-33-6 | 1.0          | 298.15     | 734.90                                | 116 | -                                           | -   | -            | -   | 371.20       | 121 | 549.68       | 121 | (3.78)     | -   |
| 413       | 344       | V   | O7105a | 2-propan-2-yloxybutane                       | 18641-81-1 | 1.0          | 298.15     | 739.60                                | 116 | -                                           | -   | -            | -   | -            | -   | 549.68       | 121 | (3.78)     | -   |
| 414       | 345       | V   | O7106a | 1-ethoxy-3-methylbutane                      | 628-04-6   | 1.0          | 298.15     | 752.10                                | 116 | -                                           | -   | -            | -   | 385.65       | 121 | 549.68       | 121 | 3.955      | 120 |
| 415       | 346       | V   | O7107a | 2-methyl-1-propoxypropane                    | 15268-49-2 | 1.0          | 298.15     | 744.00                                | 116 | -                                           | -   | -            | -   | 378.15       | 121 | 549.68       | 121 | (3.78)     | -   |
| 416       | 346       | V   | O7107b | 2-methyl-1-propoxypropane                    | 15268-49-2 | 0.03         | 298.15     | -                                     | -   | 38.07                                       | 121 | -            | -   | 378.15       | 121 | 549.68       | 121 | (3.78)     | -   |
| 417       | 347       | V   | O7108a | 2-propoxybutane                              | 61962-23-0 | 1.0          | 298.15     | 750.10                                | 116 | -                                           | -   | -            | -   | -            | -   | -            | -   | (3.78)     | -   |
| 418       | 348       | V   | O7109a | 1-propan-2-yloxybutane                       | 1860-27-1  | 1.0          | 298.15     | 746.00                                | 116 | -                                           | -   | -            | -   | 380.15       | 120 | -            | -   | (3.78)     | -   |
| 419       | 349       | V   | O7110a | 1-methoxyhexane                              | 4747-07-3  | 1.0          | 298.15     | 766.30                                | 116 | -                                           | -   | -            | -   | 398.15       | 120 | -            | -   | (3.78)     | -   |
| 420       | 350       | V   | O7111a | 1-ethoxypentane                              | 17952-11-3 | 1.0          | 298.15     | 757.20                                | 116 | -                                           | -   | -            | -   | 391.15       | 120 | -            | -   | 3.6        | 120 |
| 421       | 351       | V   | O7112a | 1-propoxybutane                              | 3073-92-5  | 1.0          | 298.15     | 754.20                                | 116 | -                                           | -   | -            | -   | 390.15       | 120 | -            | -   | (3.78)     | -   |
| 422       | 352       | V   | O8101a | 2-methyl-2-[(2-methylpropan-2-yl)oxy]propane | 6163-66-2  | 1.0          | 298.15     | 757.80                                | 116 | 37.60                                       | 114 | -            | -   | 380.40       | 121 | 550.00       | 121 | (3.08)     | -   |
| 423       | 353       | V   | O8102a | 2-methyl-2-propan-2-yloxybutane              | 3249-46-5  | 1.0          | 298.0      | -                                     | -   | 41.60                                       | 114 | -            | -   | -            | -   | -            | -   | (3.08)     | -   |
| 424       | 354       | V   | O8103a | 2-methyl-1-[(2-methylpropan-2-yl)oxy]propane | 33021-02-2 | 1.0          | 298.15     | 748.00                                | 116 | 40.10                                       | 114 | -            | -   | 439.93       | 121 | 571.41       | 121 | (3.08)     | -   |
| 425       | 355       | V   | O8104a | 2-[(2-methylpropan-2-yl)oxy]butane           | 32970-45-9 | 1.0          | 298.15     | 757.10                                | 116 | -                                           | -   | -            | -   | -            | -   | -            | -   | (3.08)     | -   |
| 426       | 356       | V   | O8105a | 1-[(2-methylpropan-2-yl)oxy]butane           | 1000-63-1  | 1.0          | 298.15     | 758.10                                | 116 | 42.30                                       | 114 | -            | -   | -            | -   | 571.41       | 121 | (3.08)     | -   |
| 427       | 357       | V   | O8106a | 2-methyl-1-(2-methylpropoxy)propane          | 628-55-7   | 1.0          | 298.15     | 745.20                                | 116 | 41.20                                       | 114 | -            | -   | 395.85       | 121 | 571.41       | 121 | (3.08)     | -   |
| 428       | 358       | V   | O8107a | 2-(2-methylpropoxy)butane                    | 92097-00-2 | 1.0          | 298.15     | 750.84                                | 116 | -                                           | -   | -            | -   | -            | -   | -            | -   | (3.08)     | -   |
| 429       | 359       | V   | O8108a | 3-methyl-1-propan-2-yloxybutane              | 92096-99-6 | 1.0          | 298.15     | 754.50                                | 116 | -                                           | -   | -            | -   | -            | -   | -            | -   | (3.08)     | -   |



Table S.1 – Reference experimental data (continued)

| $n_{\text{sim}}$ | $n_{\text{iso}}$ | Set | Code   | Name                                        | CAS         | $P$<br>[bar] | $T$<br>[K] | $\rho_{\text{liq}}$<br>[kg·m <sup>-3</sup> ] | Src | $\Delta H_{\text{vap}}$<br>[kJ·mol <sup>-1</sup> ] | Src | $T_m$<br>[K] | Src | $T_b$<br>[K] | Src | $T_c$<br>[K] | Src | $\epsilon$ | Src |
|------------------|------------------|-----|--------|---------------------------------------------|-------------|--------------|------------|----------------------------------------------|-----|----------------------------------------------------|-----|--------------|-----|--------------|-----|--------------|-----|------------|-----|
| 430              | 360              | V   | O8109a | 2-butan-2-yloxybutane                       | 6863-58-7   | 1.0          | 298.15     | 758.80                                       | 116 | -                                                  | -   | -            | -   | 394.20       | 121 | 571.41       | 121 | (3.08)     | -   |
| 431              | 360              | V   | O8109b | 2-butan-2-yloxybutane                       | 6863-58-7   | 0.02         | 298.15     | -                                            | -   | 39.99                                              | 121 | -            | -   | 394.20       | 121 | 571.41       | 121 | (3.08)     | -   |
| 432              | 361              | V   | O8110a | 3-methyl-1-propoxybutane                    | 17071-48-6  | 1.0          | 298.15     | 760.10                                       | 116 | -                                                  | -   | -            | -   | -            | -   | -            | -   | (3.08)     | -   |
| 433              | 362              | V   | O8111a | 1-(2-methylpropoxy)butane                   | 17071-47-5  | 1.0          | 298.15     | 755.20                                       | 116 | -                                                  | -   | -            | -   | 424.15       | 121 | 571.41       | 121 | (3.08)     | -   |
| 434              | 362              | V   | O8111b | 1-(2-methylpropoxy)butane                   | 17071-47-5  | 0.01         | 319.77     | -                                            | -   | 42.85                                              | 121 | -            | -   | 424.15       | 121 | 571.41       | 121 | (3.08)     | -   |
| 435              | 363              | V   | O8112a | 1-butan-2-yloxybutane                       | 999-65-5    | 1.0          | 298.15     | 761.10                                       | 116 | -                                                  | -   | -            | -   | -            | -   | -            | -   | (3.08)     | -   |
| 436              | 364              | V   | O8113a | 1-propan-2-yloxybutane                      | 5756-37-6   | 1.0          | 298.15     | 759.80                                       | 116 | -                                                  | -   | -            | -   | -            | -   | 571.41       | 121 | (3.08)     | -   |
| 437              | 365              | V   | O8114a | 1-methoxyheptane                            | 629-32-3    | 1.0          | 298.15     | 775.60                                       | 116 | 46.90                                              | 114 | -            | -   | 424.15       | 121 | -            | -   | (3.08)     | -   |
| 438              | 366              | V   | O8115a | 1-ethoxyhexane                              | 5756-43-4   | 1.0          | 298.15     | 768.20                                       | 116 | -                                                  | -   | -            | -   | 415.15       | 120 | -            | -   | (3.08)     | -   |
| 439              | 367              | V   | O8116a | 1-propoxypentane                            | 18641-82-2  | 1.0          | 298.15     | 765.30                                       | 116 | -                                                  | -   | -            | -   | -            | -   | 571.41       | 121 | (3.08)     | -   |
| 440              | 368              | V   | O8117a | 1-butoxybutane                              | 142-96-1    | 1.0          | 298.15     | 764.06                                       | 116 | 44.70                                              | 114 | 177.15       | 120 | 413.44       | 121 | 584.10       | 121 | 3.0830     | 120 |
| 441              | 369              | V   | O9101a | 2-methoxy-2,4,4-trimethylpentane            | 62108-41-2  | 1.01         | 298.15     | 792.40                                       | 118 | -                                                  | -   | -            | -   | -            | -   | -            | -   | (3.76)     | -   |
| 442              | 369              | V   | O9101b | 2-methoxy-2,4,4-trimethylpentane            | 62108-41-2  | 1.0          | 396.0      | -                                            | -   | 38.50                                              | 114 | -            | -   | -            | -   | -            | -   | (3.76)     | -   |
| 443              | 370              | V   | O9102a | 3-methyl-1-[(2-methylpropan-2-yl)oxy]butane | 92097-05-7  | 1.0          | 298.15     | 761.60                                       | 116 | -                                                  | -   | -            | -   | -            | -   | -            | -   | (3.76)     | -   |
| 444              | 371              | V   | O9103a | 1-[(2-methylpropan-2-yl)oxy]pentane         | 10100-95-5  | 1.0          | 298.15     | 766.40                                       | 116 | -                                                  | -   | -            | -   | -            | -   | -            | -   | (3.76)     | -   |
| 445              | 372              | V   | O9104a | 3-methyl-1-(2-methylpropoxy)butane          | 92097-02-4  | 1.0          | 298.15     | 759.40                                       | 116 | -                                                  | -   | -            | -   | -            | -   | -            | -   | (3.76)     | -   |
| 446              | 373              | V   | O9105a | 1-butan-2-yloxy-3-methylbutane              | 92097-04-6  | 1.0          | 298.15     | 764.30                                       | 116 | -                                                  | -   | -            | -   | -            | -   | -            | -   | (3.76)     | -   |
| 447              | 374              | V   | O9106a | 1-butoxy-3-methylbutane                     | 17071-52-2  | 1.0          | 298.15     | 767.60                                       | 116 | -                                                  | -   | -            | -   | -            | -   | -            | -   | (3.76)     | -   |
| 448              | 375              | V   | O9107a | 1-(2-methylpropoxy)pentane                  | 92097-01-3  | 1.0          | 298.15     | 765.60                                       | 116 | -                                                  | -   | -            | -   | -            | -   | -            | -   | (3.76)     | -   |
| 449              | 376              | V   | O9108a | 2-methoxyoctane                             | 1541-09-9   | 1.0          | 298.15     | 802.09                                       | 116 | -                                                  | -   | -            | -   | -            | -   | -            | -   | (3.76)     | -   |
| 450              | 377              | V   | O9109a | 1-butan-2-yloxybutane                       | 92097-03-5  | 1.0          | 298.15     | 768.70                                       | 116 | -                                                  | -   | -            | -   | -            | -   | -            | -   | (3.76)     | -   |
| 451              | 378              | V   | O9110a | 1-propan-2-yloxyhexane                      | 18636-65-2  | 1.0          | 298.15     | 767.80                                       | 116 | -                                                  | -   | -            | -   | -            | -   | -            | -   | (3.76)     | -   |
| 452              | 379              | V   | O9111a | 1-methoxyoctane                             | 929-56-6    | 1.0          | 298.15     | 783.00                                       | 116 | -                                                  | -   | -            | -   | -            | -   | 591.55       | 121 | (3.76)     | -   |
| 453              | 380              | V   | O9112a | 1-ethoxyheptane                             | 1969-43-3   | 1.0          | 298.15     | 775.30                                       | 116 | -                                                  | -   | -            | -   | -            | -   | -            | -   | (3.76)     | -   |
| 454              | 381              | V   | O9113a | 1-propoxyhexane                             | 53685-78-2  | 1.0          | 298.15     | 773.00                                       | 116 | -                                                  | -   | -            | -   | -            | -   | -            | -   | (3.76)     | -   |
| 455              | 382              | V   | O9114a | 1-butoxypentane                             | 18636-66-3  | 1.0          | 298.15     | 772.70                                       | 116 | -                                                  | -   | -            | -   | -            | -   | -            | -   | (3.76)     | -   |
| 456              | 383              | V   | O0101a | 2-ethoxy-2,4,4-trimethylpentane             | 187103-12-4 | 1.0          | 298.0      | -                                            | -   | 45.30                                              | 114 | -            | -   | -            | -   | -            | -   | (2.81)     | -   |
| 457              | 384              | V   | O0102a | 1-[(2-methylpropan-2-yl)oxy]hexane          | 69775-79-7  | 1.0          | 298.0      | -                                            | -   | 53.20                                              | 114 | -            | -   | -            | -   | -            | -   | (2.81)     | -   |
| 458              | 385              | V   | O0103a | 3-pentan-3-yloxybutane                      | 56761-99-0  | 1.0          | 293.15     | 784.80                                       | 116 | -                                                  | -   | -            | -   | -            | -   | -            | -   | (2.81)     | -   |
| 459              | 386              | V   | O0104a | 3-methyl-1-(3-methylbutoxy)butane           | 544-01-4    | 1.0          | 298.15     | 771.50                                       | 116 | 51.40                                              | 114 | -            | -   | 445.65       | 121 | 610.37       | 121 | 2.817      | 120 |
| 460              | 387              | V   | O0105a | 2-pentan-2-yloxybutane                      | 56762-00-6  | 1.0          | 293.15     | 777.80                                       | 116 | -                                                  | -   | -            | -   | -            | -   | -            | -   | (2.81)     | -   |
| 461              | 388              | V   | O0106a | 1-(3-methylbutoxy)pentane                   | 92097-07-9  | 1.0          | 298.15     | 775.10                                       | 116 | -                                                  | -   | -            | -   | -            | -   | -            | -   | (2.81)     | -   |
| 462              | 389              | V   | O0107a | 1-(2-methylpropoxy)hexane                   | 92097-06-8  | 1.0          | 298.15     | 771.20                                       | 116 | -                                                  | -   | -            | -   | -            | -   | -            | -   | (2.81)     | -   |
| 463              | 390              | V   | O0108a | 2-ethoxyoctane                              | 63028-01-3  | 1.0          | 298.15     | 782.14                                       | 116 | -                                                  | -   | -            | -   | -            | -   | -            | -   | (2.81)     | -   |
| 464              | 391              | V   | O0109a | 2-butoxyhexane                              | 101581-41-3 | 1.0          | 293.15     | 787.40                                       | 116 | -                                                  | -   | -            | -   | -            | -   | -            | -   | (2.81)     | -   |
| 465              | 392              | V   | O0110a | 1-butan-2-yloxyhexane                       | 65270-00-0  | 1.0          | 298.15     | 775.80                                       | 116 | -                                                  | -   | -            | -   | -            | -   | -            | -   | (2.81)     | -   |
| 466              | 393              | V   | O0111a | 1-propan-2-yloxyheptane                     | 86724-25-6  | 1.0          | 298.15     | 773.60                                       | 116 | -                                                  | -   | -            | -   | -            | -   | -            | -   | (2.81)     | -   |
| 467              | 394              | V   | O0112a | 1-methoxynonane                             | 7289-51-2   | 1.0          | 298.15     | 788.60                                       | 116 | -                                                  | -   | -            | -   | -            | -   | -            | -   | (2.81)     | -   |
| 468              | 395              | V   | O0113a | 1-ethoxyoctane                              | 929-61-3    | 1.0          | 298.15     | 782.30                                       | 116 | -                                                  | -   | -            | -   | -            | -   | -            | -   | (2.81)     | -   |
| 469              | 396              | V   | O0114a | 1-propoxyheptane                            | 71112-89-5  | 1.0          | 298.15     | 779.80                                       | 116 | -                                                  | -   | -            | -   | -            | -   | -            | -   | (2.81)     | -   |
| 470              | 397              | V   | O0115a | 1-butoxyhexane                              | 54459-71-1  | 1.0          | 298.15     | 778.80                                       | 116 | 53.20                                              | 114 | -            | -   | -            | -   | -            | -   | (2.81)     | -   |
| 471              | 398              | V   | O0116a | 1-pentoxypentane                            | 693-65-2    | 1.0          | 298.15     | 779.20                                       | 116 | -                                                  | -   | 203.95       | 120 | 460.15       | 120 | -            | -   | 2.798      | 120 |
| 472              | 398              | V   | O0116b | 1-pentoxypentane                            | 693-65-2    | 1.0          | 388.0      | -                                            | -   | 46.20                                              | 114 | 203.95       | 120 | 460.15       | 120 | -            | -   | 2.798      | 120 |
| 473              | 399              | V   | O7201a | 2-(2-methoxyethoxy)-2-methylpropane         | 66728-50-5  | 1.0          | 404.65     | -                                            | -   | 34.80                                              | 121 | -            | -   | 404.65       | 121 | -            | -   | (4.09)     | -   |
| 474              | 400              | V   | O7202a | 2,2-diethoxypropane                         | 126-84-1    | 1.0          | 298.15     | 868.80                                       | 116 | 43.90                                              | 114 | -            | -   | 387.15       | 121 | -            | -   | (4.09)     | -   |
| 475              | 401              | V   | O7203a | 2-(propan-2-yloxymethoxy)propane            | 2568-89-0   | 1.0          | 298.15     | 813.72                                       | 116 | -                                                  | -   | -            | -   | -            | -   | -            | -   | (4.09)     | -   |
| 476              | 402              | V   | O7204a | 1,1-diethoxypropane                         | 4744-08-5   | 1.0          | 293.15     | 825.00                                       | 120 | -                                                  | -   | -            | -   | 396.15       | 121 | -            | -   | (4.09)     | -   |
| 477              | 402              | V   | O7204b | 1,1-diethoxypropane                         | 4744-08-5   | 1.0          | 396.15     | -                                            | -   | 34.00                                              | 121 | -            | -   | 396.15       | 121 | -            | -   | (4.09)     | -   |

Table S.1 – Reference experimental data (continued)

| $n_{sim}$ | $n_{iso}$ | Set | Code   | Name                                          | CAS        | $P$<br>[bar] | $T$<br>[K] | $\rho_{liq}$<br>[kg·m <sup>-3</sup> ] | Src | $\Delta H_{vap}$<br>[kJ·mol <sup>-1</sup> ] | Src | $T_m$<br>[K] | Src | $T_b$<br>[K] | Src | $T_c$<br>[K] | Src | $\epsilon$ | Src |
|-----------|-----------|-----|--------|-----------------------------------------------|------------|--------------|------------|---------------------------------------|-----|---------------------------------------------|-----|--------------|-----|--------------|-----|--------------|-----|------------|-----|
| 478       | 403       | V   | O7205a | 1,5-dimethoxypentane                          | 111-89-7   | 1.0          | 298.15     | 851.60                                | 116 | -                                           | -   | -            | -   | -            | -   | -            | -   | (4.09)     | -   |
| 479       | 404       | V   | O7206a | 1-(2-methoxyethoxy)butane                     | 13343-98-1 | 1.0          | 298.15     | 840.90                                | 116 | 47.80                                       | 114 | -            | -   | 420.08       | 121 | 659.33       | 121 | (4.09)     | -   |
| 480       | 405       | V   | O7207a | 1-methoxy-3-propoxypropane                    | 89851-49-0 | 1.0          | 298.15     | 840.30                                | 116 | -                                           | -   | -            | -   | -            | -   | -            | -   | (4.09)     | -   |
| 481       | 406       | V   | O7208a | 1,3-diethoxypropane                           | 3459-83-4  | 1.0          | 298.15     | 831.20                                | 116 | 45.90                                       | 114 | -            | -   | -            | -   | -            | -   | (4.09)     | -   |
| 482       | 407       | V   | O7209a | 1-(propoxymethoxy)propane                     | 505-84-0   | 1.0          | 293.15     | 834.50                                | 120 | -                                           | -   | 175.85       | 120 | 413.65       | 121 | -            | -   | (4.09)     | -   |
| 483       | 407       | V   | O7209b | 1-(propoxymethoxy)propane                     | 505-84-0   | 1.0          | 413.65     | -                                     | -   | 35.65                                       | 121 | 175.85       | 120 | 413.65       | 121 | -            | -   | (4.09)     | -   |
| 484       | 408       | V   | O7210a | 1-(2-ethoxyethoxy)propane                     | 18854-31-4 | 1.0          | 298.15     | 832.70                                | 116 | 46.80                                       | 114 | -            | -   | -            | -   | -            | -   | (4.09)     | -   |
| 485       | 409       | V   | O8201a | 2,2-dimethoxyhexane                           | 98944-43-5 | 1.0          | 298.15     | 852.70                                | 116 | -                                           | -   | -            | -   | -            | -   | -            | -   | (4.09)     | -   |
| 486       | 410       | V   | O8202a | 2-(2-ethoxyethoxy)-2-methylpropane            | 51422-54-9 | 1.0          | 421.15     | -                                     | -   | 36.36                                       | 121 | -            | -   | 421.15       | 121 | -            | -   | (4.09)     | -   |
| 487       | 411       | V   | O8203a | 1,1-diethoxybutane                            | 3658-95-5  | 1.0          | 416.5      | -                                     | -   | 35.92                                       | 121 | -            | -   | 416.50       | 121 | -            | -   | (4.09)     | -   |
| 488       | 412       | V   | O8204a | 1-(1-propoxyethoxy)propane                    | 105-82-8   | 1.0          | 298.15     | 825.58                                | 116 | -                                           | -   | -            | -   | 478.13       | 121 | -            | -   | (4.09)     | -   |
| 489       | 413       | V   | O8205a | 1,6-dimethoxyhexane                           | 13179-98-1 | 1.0          | 298.15     | 851.80                                | 116 | -                                           | -   | -            | -   | -            | -   | -            | -   | (4.09)     | -   |
| 490       | 414       | V   | O8206a | 1-ethoxy-5-methoxypentane                     | 17315-35-4 | 1.0          | 298.15     | 843.30                                | 116 | -                                           | -   | -            | -   | -            | -   | -            | -   | (4.09)     | -   |
| 491       | 415       | V   | O8207a | 1-methoxy-4-propoxybutane                     | -          | 1.0          | 298.15     | 840.70                                | 116 | -                                           | -   | -            | -   | -            | -   | -            | -   | (4.09)     | -   |
| 492       | 416       | V   | O8208a | 1,4-diethoxybutane                            | 13344-00-8 | 1.0          | 298.15     | 833.50                                | 116 | -                                           | -   | -            | -   | -            | -   | -            | -   | (4.09)     | -   |
| 493       | 417       | V   | O8209a | 1-(2-ethoxyethoxy)butane                      | 4413-13-2  | 1.0          | 298.15     | 833.10                                | 116 | 50.90                                       | 114 | -            | -   | 434.03       | 121 | -            | -   | (4.09)     | -   |
| 494       | 418       | V   | O8210a | 1-(2-propoxyethoxy)propane                    | 18854-56-3 | 1.0          | 298.15     | 831.20                                | 120 | 50.60                                       | 114 | -            | -   | 478.13       | 121 | -            | -   | (4.09)     | -   |
| 495       | 419       | V   | O9201a | 2-methyl-1-(2-methylpropoxymethoxy)propane    | 2568-91-4  | 1.0          | 298.15     | 820.27                                | 116 | -                                           | -   | -            | -   | 438.65       | 121 | -            | -   | (4.09)     | -   |
| 496       | 419       | V   | O9201b | 2-methyl-1-(2-methylpropoxymethoxy)propane    | 2568-91-4  | 1.0          | 438.65     | -                                     | -   | 38.02                                       | 121 | -            | -   | 438.65       | 121 | -            | -   | (4.09)     | -   |
| 497       | 420       | V   | O9202a | 1,1-diethoxypentane                           | 3658-79-5  | 1.0          | 295.15     | 829.00                                | 120 | -                                           | -   | -            | -   | 520.68       | 121 | -            | -   | (4.09)     | -   |
| 498       | 421       | V   | O9203a | 1-ethoxy-6-methoxyhexane                      | 93281-63-1 | 1.0          | 298.15     | 844.00                                | 116 | -                                           | -   | -            | -   | -            | -   | -            | -   | (4.09)     | -   |
| 499       | 422       | V   | O9204a | 1,5-diethoxypentane                           | 90724-89-3 | 1.0          | 298.15     | 838.60                                | 116 | -                                           | -   | -            | -   | -            | -   | -            | -   | (4.09)     | -   |
| 500       | 423       | V   | O9205a | 1-butoxy-4-methoxybutane                      | 91391-43-4 | 1.0          | 298.15     | 840.60                                | 116 | -                                           | -   | -            | -   | -            | -   | -            | -   | (4.09)     | -   |
| 501       | 424       | V   | O9206a | 1-(butoxymethoxy)butane                       | 2568-90-3  | 1.0          | 298.15     | 831.53                                | 116 | 48.10                                       | 114 | 214.15       | 120 | 452.35       | 121 | -            | -   | (4.09)     | -   |
| 502       | 425       | V   | O9207a | 1-(2-propoxyethoxy)butane                     | 18854-58-5 | 1.0          | 298.0      | -                                     | -   | 54.70                                       | 114 | -            | -   | -            | -   | -            | -   | (4.09)     | -   |
| 503       | 426       | V   | O0201a | 2-methyl-1-[1-(2-methylpropoxy)ethoxy]propane | 5669-09-0  | 1.0          | 298.15     | 816.80                                | 116 | -                                           | -   | -            | -   | 444.45       | 121 | -            | -   | (4.09)     | -   |
| 504       | 426       | V   | O0201b | 2-methyl-1-[1-(2-methylpropoxy)ethoxy]propane | 5669-09-0  | 1.0          | 351.0      | -                                     | -   | 46.10                                       | 114 | -            | -   | 444.45       | 121 | -            | -   | (4.09)     | -   |
| 505       | 427       | V   | O0203a | 1-(1-butoxyethoxy)butane                      | 871-22-7   | 1.0          | 298.15     | 829.03                                | 116 | 57.80                                       | 114 | -            | -   | 415.43       | 121 | -            | -   | (4.09)     | -   |
| 506       | 428       | V   | O0204a | 1-butoxy-5-methoxypentane                     | -          | 1.0          | 298.15     | 840.90                                | 116 | -                                           | -   | -            | -   | -            | -   | -            | -   | (4.09)     | -   |
| 507       | 429       | V   | O0205a | 1,4-dipropoxybutane                           | -          | 1.0          | 293.15     | 840.90                                | 116 | -                                           | -   | -            | -   | -            | -   | -            | -   | (4.09)     | -   |
| 508       | 430       | V   | O0206a | 1-(2-butoxyethoxy)butane                      | 112-48-1   | 1.0          | 298.15     | 833.70                                | 116 | 58.80                                       | 114 | 204.05       | 120 | 476.45       | 121 | 715.45       | 121 | (4.09)     | -   |
| 509       | 431       | V   | O7301a | 1,3,3-trimethoxybutane                        | 6607-66-5  | 1.0          | 426.15     | -                                     | -   | 36.84                                       | 121 | -            | -   | 426.15       | 121 | -            | -   | (4.78)     | -   |
| 510       | 432       | V   | O7302a | 1,1,1-trimethoxybutane                        | 43083-12-1 | 1.0          | 419.15     | -                                     | -   | 36.17                                       | 121 | -            | -   | 419.15       | 121 | -            | -   | (4.78)     | -   |
| 511       | 433       | V   | O7303a | 1,1,3-trimethoxybutane                        | 10138-89-3 | 1.0          | 430.15     | -                                     | -   | 37.22                                       | 121 | -            | -   | 430.15       | 121 | -            | -   | (4.78)     | -   |
| 512       | 434       | V   | O7304a | 1,1-diethoxy-2-methoxyethane                  | 4819-75-4  | 1.0          | 419.15     | -                                     | -   | 36.17                                       | 121 | -            | -   | 419.15       | 121 | -            | -   | (4.78)     | -   |
| 513       | 435       | V   | O7305a | diethoxymethoxyethane                         | 122-51-0   | 1.0          | 298.15     | 893.80                                | 116 | 47.80                                       | 114 | -            | -   | 416.15       | 121 | -            | -   | 4.779      | 120 |
| 514       | 436       | V   | O7306a | 1-(2-ethoxyethoxy)-2-methoxyethane            | 1002-67-1  | 1.0          | 293.15     | 922.90                                | 116 | -                                           | -   | -            | -   | 416.90       | 121 | -            | -   | (4.78)     | -   |
| 515       | 437       | V   | O8301a | 1,1,1-trimethoxypentane                       | 13820-09-2 | 1.0          | 438.15     | -                                     | -   | 37.98                                       | 121 | -            | -   | 438.15       | 121 | -            | -   | (6.00)     | -   |
| 516       | 438       | V   | O8302a | 1,1,1-triethoxyethane                         | 78-39-7    | 1.0          | 298.15     | 884.70                                | 120 | -                                           | -   | -            | -   | 418.15       | 121 | -            | -   | (6.00)     | -   |
| 517       | 438       | V   | O8302b | 1,1,1-triethoxyethane                         | 78-39-7    | 1.0          | 418.15     | -                                     | -   | 36.08                                       | 121 | -            | -   | 418.15       | 121 | -            | -   | (6.00)     | -   |
| 518       | 439       | V   | O8303a | 1-ethoxy-2-(2-ethoxyethoxy)ethane             | 112-36-7   | 1.0          | 298.15     | 903.30                                | 116 | 56.40                                       | 114 | 228.85       | 120 | 462.15       | 121 | 624.00       | 121 | (6.00)     | -   |
| 519       | 440       | V   | O9301a | 1,1,1-triethoxypropane                        | 115-80-0   | 1.0          | 444.15     | -                                     | -   | 38.55                                       | 121 | -            | -   | 444.15       | 121 | -            | -   | (6.00)     | -   |
| 520       | 441       | V   | O0301a | 2-[di(propan-2-yloxy)methoxy]propane          | 4447-60-3  | 1.0          | 293.15     | 862.10                                | 120 | -                                           | -   | -            | -   | 440.15       | 121 | -            | -   | (6.00)     | -   |
| 521       | 441       | V   | O0301b | 2-[di(propan-2-yloxy)methoxy]propane          | 4447-60-3  | 1.0          | 440.15     | -                                     | -   | 38.16                                       | 121 | -            | -   | 440.15       | 121 | -            | -   | (6.00)     | -   |
| 522       | 442       | V   | O0303a | 1-(dipropoxymethoxy)propane                   | 621-76-1   | 1.0          | 467.15     | -                                     | -   | 40.74                                       | 121 | -            | -   | 467.15       | 121 | -            | -   | (6.00)     | -   |
| 523       | 443       | V   | O0304a | 1-[2-(2-propoxyethoxy)ethoxy]propane          | 72072-32-3 | 1.0          | 288.15     | 886.90                                | 116 | -                                           | -   | -            | -   | -            | -   | -            | -   | (6.00)     | -   |
| 524       | 444       | V   | O7401a | 1,1,3,3-tetramethoxypropane                   | 102-52-3   | 1.0          | 298.15     | 997.00                                | 120 | -                                           | -   | -            | -   | 456.15       | 121 | -            | -   | (5.01)     | -   |
| 525       | 445       | V   | O7402a | ethoxymethoxymethoxymethoxyethane             | 4431-82-7  | 1.0          | 298.0      | -                                     | -   | 53.60                                       | 114 | -            | -   | -            | -   | -            | -   | (5.01)     | -   |

Table S.1 – Reference experimental data (continued)

| $n_{sim}$ | $n_{iso}$ | Set | Code   | Name                                          | CAS        | $P$<br>[bar] | $T$<br>[K] | $\rho_{liq}$<br>[kg·m <sup>-3</sup> ] | Src | $\Delta H_{vap}$<br>[kJ·mol <sup>-1</sup> ] | Src | $T_m$<br>[K] | Src | $T_b$<br>[K] | Src | $T_c$<br>[K] | Src | $\epsilon$ | Src |
|-----------|-----------|-----|--------|-----------------------------------------------|------------|--------------|------------|---------------------------------------|-----|---------------------------------------------|-----|--------------|-----|--------------|-----|--------------|-----|------------|-----|
| 526       | 446       | V   | O8401a | 1-methoxy-2-[2-(2-methoxyethoxy)ethoxy]ethane | 112-49-2   | 1.0          | 293.15     | 986.00                                | 120 | -                                           | -   | 229.35       | 120 | 489.15       | 121 | 651.00       | 121 | 7.62       | 120 |
| 527       | 446       | V   | O8401b | 1-methoxy-2-[2-(2-methoxyethoxy)ethoxy]ethane | 112-49-2   | 1.0          | 489.15     | -                                     | -   | 50.90                                       | 121 | 229.35       | 120 | 489.15       | 121 | 651.00       | 121 | 7.62       | 120 |
| 528       | 447       | V   | O9401a | triethoxymethoxyethane                        | 78-09-1    | 1.0          | 293.15     | 918.60                                | 120 | 52.90                                       | 114 | -            | -   | 432.65       | 121 | -            | -   | (5.01)     | -   |
| 529       | 448       | V   | A7102a | 2-ethyl-3-methylbutanal                       | 26254-92-2 | 1.0          | 298.15     | 829.50                                | 117 | -                                           | -   | -            | -   | -            | -   | -            | -   | (9.07)     | -   |
| 530       | 449       | V   | A7104a | 3,4-dimethylpentanal                          | 19353-21-0 | 1.0          | 298.15     | 823.10                                | 117 | -                                           | -   | -            | -   | -            | -   | -            | -   | (9.07)     | -   |
| 531       | 449       | V   | A7104b | 3,4-dimethylpentanal                          | 19353-21-0 | 1.0          | 334.0      | -                                     | -   | 42.40                                       | 114 | -            | -   | -            | -   | -            | -   | (9.07)     | -   |
| 532       | 450       | V   | A7107a | 3-methylhexanal                               | 19269-28-4 | 1.0          | 298.15     | 814.33                                | 117 | -                                           | -   | -            | -   | 416.15       | 121 | 620.41       | 121 | (9.07)     | -   |
| 533       | 450       | V   | A7107b | 3-methylhexanal                               | 19269-28-4 | 1.0          | 329.0      | -                                     | -   | 42.80                                       | 114 | -            | -   | 416.15       | 121 | 620.41       | 121 | (9.07)     | -   |
| 534       | 451       | V   | A7108a | 4-methylhexanal                               | 41065-97-8 | 1.0          | 298.15     | 824.00                                | 117 | -                                           | -   | -            | -   | -            | -   | 620.41       | 121 | (9.07)     | -   |
| 535       | 452       | V   | A7109a | 5-methylhexanal                               | 1860-39-5  | 1.0          | 293.15     | 820.60                                | 117 | -                                           | -   | -            | -   | -            | -   | 620.41       | 121 | (9.07)     | -   |
| 536       | 453       | V   | A7110a | heptanal                                      | 111-71-7   | 1.0          | 298.15     | 813.29                                | 117 | 48.00                                       | 114 | 229.21       | 120 | 425.95       | 121 | 616.80       | 121 | 9.07       | 120 |
| 537       | 454       | V   | A8101a | 2-ethyl-4-methylpentanal                      | 10349-95-8 | 1.0          | 293.15     | 847.60                                | 117 | -                                           | -   | -            | -   | -            | -   | -            | -   | (13.51)    | -   |
| 538       | 455       | V   | A8102a | 2,4-dimethylhexanal                           | -          | 1.0          | 293.15     | 847.60                                | 117 | -                                           | -   | -            | -   | -            | -   | -            | -   | (13.51)    | -   |
| 539       | 456       | V   | A8103a | 2-propylpentanal                              | 18295-59-5 | 0.01         | 329.07     | 802.38                                | 121 | -                                           | -   | -            | -   | 433.15       | 121 | 642.39       | 121 | (13.51)    | -   |
| 540       | 457       | V   | A8104a | 2-ethylhexanal                                | 123-05-7   | 1.0          | 298.15     | 815.16                                | 117 | -                                           | -   | -            | -   | 433.80       | 121 | 642.39       | 121 | (13.51)    | -   |
| 541       | 457       | V   | A8104b | 2-ethylhexanal                                | 123-05-7   | 0.01         | 329.59     | -                                     | -   | 44.66                                       | 121 | -            | -   | 433.80       | 121 | 642.39       | 121 | (13.51)    | -   |
| 542       | 458       | V   | A8109a | octanal                                       | 124-13-0   | 1.01         | 298.15     | 821.07                                | 118 | 51.00                                       | 114 | -            | -   | 447.15       | 121 | 638.90       | 121 | (13.51)    | -   |
| 543       | 459       | V   | A9101a | 2-ethyl-2,4-dimethylpentanal                  | -          | 1.0          | 298.15     | 827.00                                | 117 | -                                           | -   | -            | -   | -            | -   | -            | -   | (13.51)    | -   |
| 544       | 460       | V   | A9102a | 3,5,5-trimethylhexanal                        | 5435-64-3  | 0.01         | 347.35     | 778.97                                | 121 | -                                           | -   | -            | -   | 456.62       | 121 | 662.74       | 121 | (13.51)    | -   |
| 545       | 461       | V   | A9103a | 2,4,5-trimethylhexanal                        | -          | 1.0          | 291.15     | 884.30                                | 117 | -                                           | -   | -            | -   | -            | -   | -            | -   | (13.51)    | -   |
| 546       | 462       | V   | A9104a | 2-ethyl-4-methylhexanal                       | -          | 1.0          | 293.15     | 848.30                                | 117 | -                                           | -   | -            | -   | -            | -   | -            | -   | (13.51)    | -   |
| 547       | 463       | V   | A9105a | 4-methyl-2-propylpentanal                     | -          | 1.0          | 293.15     | 842.30                                | 117 | -                                           | -   | -            | -   | -            | -   | -            | -   | (13.51)    | -   |
| 548       | 464       | V   | A9106a | 2-methyloctanal                               | 7786-29-0  | 0.01         | 347.53     | 785.37                                | 121 | -                                           | -   | -            | -   | 456.62       | 121 | 662.74       | 121 | (13.51)    | -   |
| 549       | 465       | V   | A9109a | nonanal                                       | 124-19-6   | 1.01         | 298.15     | 831.04                                | 118 | 55.30                                       | 114 | -            | -   | 468.15       | 121 | 662.74       | 121 | (13.51)    | -   |
| 550       | 466       | V   | A0101a | 4-methyl-2-propylhexanal                      | 85153-29-3 | 1.0          | 293.15     | 843.00                                | 117 | -                                           | -   | -            | -   | -            | -   | -            | -   | (13.51)    | -   |
| 551       | 467       | V   | A0103a | 3,7-dimethyloctanal                           | 5988-91-0  | 1.0          | 298.15     | 813.40                                | 117 | -                                           | -   | -            | -   | 403.15       | 121 | 656.59       | 121 | (13.51)    | -   |
| 552       | 467       | V   | A0103b | 3,7-dimethyloctanal                           | 5988-91-0  | 1.0          | 403.15     | -                                     | -   | 24.28                                       | 121 | -            | -   | 403.15       | 121 | 656.59       | 121 | (13.51)    | -   |
| 553       | 468       | V   | A0107a | decanal                                       | 112-31-2   | 1.0          | 298.15     | 824.90                                | 117 | 59.50                                       | 114 | -            | -   | 488.15       | 121 | 674.20       | 121 | (13.51)    | -   |
| 554       | 469       | V   | K7101a | 3,3-dimethylpentan-2-one                      | 20669-04-9 | 1.0          | 294.15     | 823.00                                | 117 | -                                           | -   | -            | -   | 403.75       | 121 | 611.41       | 121 | (12.70)    | -   |
| 555       | 469       | V   | K7101b | 3,3-dimethylpentan-2-one                      | 20669-04-9 | 0.01         | 300.55     | -                                     | -   | 40.69                                       | 121 | -            | -   | 403.75       | 121 | 611.41       | 121 | (12.70)    | -   |
| 556       | 470       | V   | K7102a | 2,2-dimethylpentan-3-one                      | 564-04-5   | 1.0          | 298.15     | 808.40                                | 117 | 42.30                                       | 114 | 228.15       | 120 | 398.15       | 121 | 611.41       | 121 | (12.70)    | -   |
| 557       | 471       | V   | K7103a | 4,4-dimethylpentan-2-one                      | 590-50-1   | 1.0          | 298.15     | 801.20                                | 117 | -                                           | -   | 209.15       | 120 | 398.15       | 121 | 611.41       | 121 | (12.70)    | -   |
| 558       | 471       | V   | K7103b | 4,4-dimethylpentan-2-one                      | 590-50-1   | 0.02         | 298.15     | -                                     | -   | 39.71                                       | 121 | 209.15       | 120 | 398.15       | 121 | 611.41       | 121 | (12.70)    | -   |
| 559       | 472       | V   | K7104a | 2,4-dimethylpentan-3-one                      | 565-80-0   | 1.0          | 298.15     | 799.73                                | 117 | 41.50                                       | 114 | 204.75       | 120 | 397.55       | 121 | 611.41       | 121 | (12.70)    | -   |
| 560       | 473       | V   | K7105a | 3,4-dimethylpentan-2-one                      | 565-78-6   | 1.0          | 293.15     | 827.30                                | 117 | -                                           | -   | -            | -   | 405.15       | 121 | 611.41       | 121 | (12.70)    | -   |
| 561       | 473       | V   | K7105b | 3,4-dimethylpentan-2-one                      | 565-78-6   | 0.01         | 301.67     | -                                     | -   | 41.38                                       | 121 | -            | -   | 405.15       | 121 | 611.41       | 121 | (12.70)    | -   |
| 562       | 474       | V   | K7106a | 4-methylhexan-3-one                           | 17042-16-9 | 1.0          | 298.15     | 824.00                                | 117 | -                                           | -   | -            | -   | 409.15       | 121 | 611.41       | 121 | (12.70)    | -   |
| 563       | 475       | V   | K7107a | 2-methylhexan-3-one                           | 7379-12-6  | 0.01         | 302.47     | 809.45                                | 121 | 41.15                                       | 121 | -            | -   | 406.15       | 121 | 611.41       | 121 | (12.70)    | -   |
| 564       | 476       | V   | K7108a | 3-ethylpentan-2-one                           | 6137-03-7  | 1.0          | 295.15     | 815.30                                | 117 | -                                           | -   | -            | -   | 411.15       | 121 | 611.41       | 121 | (12.70)    | -   |
| 565       | 476       | V   | K7108b | 3-ethylpentan-2-one                           | 6137-03-7  | 0.01         | 306.47     | -                                     | -   | 41.70                                       | 121 | -            | -   | 411.15       | 121 | 611.41       | 121 | (12.70)    | -   |
| 566       | 477       | V   | K7109a | 3-methylhexan-2-one                           | 2550-21-2  | 1.0          | 298.15     | 828.00                                | 117 | -                                           | -   | -            | -   | 413.15       | 121 | 611.41       | 121 | (12.70)    | -   |
| 567       | 477       | V   | K7109b | 3-methylhexan-2-one                           | 2550-21-2  | 0.01         | 308.07     | -                                     | -   | 41.81                                       | 121 | -            | -   | 413.15       | 121 | 611.41       | 121 | (12.70)    | -   |
| 568       | 478       | V   | K7110a | 5-methylhexan-3-one                           | 623-56-3   | 1.0          | 293.15     | 812.00                                | 117 | -                                           | -   | -            | -   | 409.15       | 121 | 611.41       | 121 | (12.70)    | -   |
| 569       | 478       | V   | K7110b | 5-methylhexan-3-one                           | 623-56-3   | 0.01         | 304.87     | -                                     | -   | 41.59                                       | 121 | -            | -   | 409.15       | 121 | 611.41       | 121 | (12.70)    | -   |
| 570       | 479       | V   | K7111a | 4-methylhexan-2-one                           | 105-42-0   | 1.0          | 298.15     | 808.50                                | 117 | -                                           | -   | -            | -   | 412.15       | 121 | 611.41       | 121 | (12.70)    | -   |
| 571       | 479       | V   | K7111b | 4-methylhexan-2-one                           | 105-42-0   | 0.01         | 307.27     | -                                     | -   | 42.04                                       | 121 | -            | -   | 412.15       | 121 | 611.41       | 121 | (12.70)    | -   |
| 572       | 480       | V   | K7112a | 5-methylhexan-2-one                           | 110-12-3   | 1.0          | 293.15     | 811.60                                | 117 | -                                           | -   | -            | -   | 417.95       | 121 | 611.41       | 121 | 13.53      | 120 |
| 573       | 480       | V   | K7112b | 5-methylhexan-2-one                           | 110-12-3   | 0.01         | 311.91     | -                                     | -   | 42.18                                       | 121 | -            | -   | 417.95       | 121 | 611.41       | 121 | 13.53      | 120 |

Table S.1 – Reference experimental data (continued)

| $n_{sim}$ | $n_{iso}$ | Set | Code   | Name                            | CAS        | $P$<br>[bar] | $T$<br>[K] | $\rho_{liq}$<br>[kg·m <sup>-3</sup> ] | Src | $\Delta H_{vap}$<br>[kJ·mol <sup>-1</sup> ] | Src | $T_m$<br>[K] | Src | $T_b$<br>[K] | Src | $T_c$<br>[K] | Src | $\epsilon$ | Src |
|-----------|-----------|-----|--------|---------------------------------|------------|--------------|------------|---------------------------------------|-----|---------------------------------------------|-----|--------------|-----|--------------|-----|--------------|-----|------------|-----|
| 574       | 481       | V   | K7113a | heptan-4-one                    | 123-19-3   | 1.0          | 298.15     | 811.60                                | 117 | -                                           | -   | 241.05       | 120 | 417.15       | 121 | 602.00       | 121 | 12.60      | 120 |
| 575       | 481       | V   | K7113b | heptan-4-one                    | 123-19-3   | 0.01         | 311.27     | -                                     | -   | 42.89                                       | 121 | 241.05       | 120 | 417.15       | 121 | 602.00       | 121 | 12.60      | 120 |
| 576       | 482       | V   | K7114a | heptan-3-one                    | 106-35-4   | 1.0          | 298.15     | 814.64                                | 117 | -                                           | -   | 235.95       | 120 | 420.55       | 121 | 606.60       | 121 | 12.7       | 120 |
| 577       | 482       | V   | K7114b | heptan-3-one                    | 106-35-4   | 0.01         | 313.99     | -                                     | -   | 43.20                                       | 121 | 235.95       | 120 | 420.55       | 121 | 606.60       | 121 | 12.7       | 120 |
| 578       | 483       | V   | K7115a | heptan-2-one                    | 110-43-0   | 1.0          | 298.15     | 811.64                                | 117 | 46.10                                       | 114 | 238.45       | 120 | 424.05       | 121 | 611.40       | 121 | 11.95      | 120 |
| 579       | 484       | V   | K8101a | 3,3,4-trimethylpentan-2-one     | 5340-47-6  | 1.0          | 293.15     | 839.50                                | 117 | -                                           | -   | -            | -   | -            | -   | -            | -   | (10.00)    | -   |
| 580       | 485       | V   | K8102a | 2,2,4-trimethylpentan-3-one     | 5857-36-3  | 1.0          | 298.15     | 802.30                                | 117 | 43.30                                       | 114 | -            | -   | 408.25       | 121 | 633.39       | 121 | (10.00)    | -   |
| 581       | 486       | V   | K8103a | 3,4,4-trimethylpentan-2-one     | 5340-45-4  | 1.0          | 293.15     | 826.00                                | 117 | -                                           | -   | -            | -   | -            | -   | -            | -   | (10.00)    | -   |
| 582       | 487       | V   | K8104a | 3-ethyl-3-methylpentan-2-one    | 19780-65-5 | 1.0          | 293.15     | 838.90                                | 117 | -                                           | -   | -            | -   | 426.60       | 121 | 633.39       | 121 | (10.00)    | -   |
| 583       | 487       | V   | K8104b | 3-ethyl-3-methylpentan-2-one    | 19780-65-5 | 0.01         | 318.83     | -                                     | -   | 43.56                                       | 121 | -            | -   | 426.60       | 121 | 633.39       | 121 | (10.00)    | -   |
| 584       | 488       | V   | K8105a | 4,4-dimethylhexan-3-one         | 19550-14-2 | 1.0          | 293.15     | 829.80                                | 117 | -                                           | -   | -            | -   | 421.15       | 121 | 633.39       | 121 | (10.00)    | -   |
| 585       | 488       | V   | K8105b | 4,4-dimethylhexan-3-one         | 19550-14-2 | 0.01         | 314.47     | -                                     | -   | 43.21                                       | 121 | -            | -   | 421.15       | 121 | 633.39       | 121 | (10.00)    | -   |
| 586       | 489       | V   | K8106a | 3,3-dimethylhexan-2-one         | 26118-38-7 | 1.0          | 293.15     | 825.70                                | 117 | -                                           | -   | -            | -   | 420.15       | 121 | 633.39       | 121 | (10.00)    | -   |
| 587       | 490       | V   | K8107a | 2,2-dimethylhexan-3-one         | 5405-79-8  | 1.0          | 298.15     | 810.50                                | 117 | -                                           | -   | -            | -   | 419.15       | 121 | 633.39       | 121 | (10.00)    | -   |
| 588       | 490       | V   | K8107b | 2,2-dimethylhexan-3-one         | 5405-79-8  | 0.01         | 312.87     | -                                     | -   | 42.32                                       | 121 | -            | -   | 419.15       | 121 | 633.39       | 121 | (10.00)    | -   |
| 589       | 491       | V   | K8108a | 4,4-dimethylhexan-2-one         | 40239-18-7 | 1.0          | 293.15     | 829.00                                | 117 | -                                           | -   | -            | -   | -            | -   | -            | -   | (10.00)    | -   |
| 590       | 492       | V   | K8109a | 5,5-dimethylhexan-3-one         | 5340-30-7  | 1.0          | 293.15     | 812.00                                | 117 | -                                           | -   | -            | -   | -            | -   | -            | -   | (10.00)    | -   |
| 591       | 493       | V   | K8110a | 2,4-dimethylhexan-3-one         | 18641-70-8 | 1.0          | 365.0      | -                                     | -   | 42.50                                       | 114 | -            | -   | -            | -   | -            | -   | (10.00)    | -   |
| 592       | 494       | V   | K8111a | 2,5-dimethylhexan-3-one         | 1888-57-9  | 1.0          | 293.15     | 812.10                                | 117 | -                                           | -   | -            | -   | 420.65       | 121 | 633.39       | 121 | (10.00)    | -   |
| 593       | 494       | V   | K8111b | 2,5-dimethylhexan-3-one         | 1888-57-9  | 0.01         | 314.07     | -                                     | -   | 42.57                                       | 121 | -            | -   | 420.65       | 121 | 633.39       | 121 | (10.00)    | -   |
| 594       | 495       | V   | K8112a | 3-ethyl-4-methylpentan-2-one    | 71172-57-1 | 0.01         | 319.67     | 790.97                                | 121 | 43.48                                       | 121 | -            | -   | 427.65       | 121 | 633.39       | 121 | (10.00)    | -   |
| 595       | 496       | V   | K8113a | 3,4-dimethylhexan-2-one         | 19550-10-8 | 1.0          | 295.15     | 829.50                                | 117 | -                                           | -   | -            | -   | 431.15       | 121 | 633.39       | 121 | (10.00)    | -   |
| 596       | 496       | V   | K8113b | 3,4-dimethylhexan-2-one         | 19550-10-8 | 0.01         | 322.47     | -                                     | -   | 44.14                                       | 121 | -            | -   | 431.15       | 121 | 633.39       | 121 | (10.00)    | -   |
| 597       | 497       | V   | K8114a | 3-methylheptan-4-one            | 15726-15-5 | 1.0          | 298.15     | 817.00                                | 117 | -                                           | -   | -            | -   | 426.15       | 121 | 633.39       | 121 | (10.00)    | -   |
| 598       | 498       | V   | K8115a | 4-methylheptan-3-one            | 6137-11-7  | 1.0          | 298.15     | 820.00                                | 117 | -                                           | -   | -            | -   | -            | -   | 633.39       | 121 | (10.00)    | -   |
| 599       | 499       | V   | K8116a | 2-methylheptan-3-one            | 13019-20-0 | 1.0          | 293.15     | 817.50                                | 117 | -                                           | -   | -            | -   | 431.15       | 121 | 633.39       | 121 | (10.00)    | -   |
| 600       | 499       | V   | K8116b | 2-methylheptan-3-one            | 13019-20-0 | 0.01         | 322.47     | -                                     | -   | 44.14                                       | 121 | -            | -   | 431.15       | 121 | 633.39       | 121 | (10.00)    | -   |
| 601       | 500       | V   | K8117a | 3-methylheptan-2-one            | 2371-19-9  | 0.01         | 327.27     | 794.22                                | 121 | 43.84                                       | 121 | -            | -   | 437.15       | 121 | 633.39       | 121 | (10.00)    | -   |
| 602       | 501       | V   | K8118a | 5-methylheptan-3-one            | 541-85-5   | 1.0          | 297.15     | 829.00                                | 117 | -                                           | -   | -            | -   | 435.14       | 121 | 633.39       | 121 | (10.00)    | -   |
| 603       | 501       | V   | K8118b | 5-methylheptan-3-one            | 541-85-5   | 0.01         | 322.36     | -                                     | -   | 44.44                                       | 121 | -            | -   | 435.14       | 121 | 633.39       | 121 | (10.00)    | -   |
| 604       | 502       | V   | K8119a | 2-methylheptan-4-one            | 626-33-5   | 1.0          | 295.15     | 813.00                                | 120 | -                                           | -   | -            | -   | 427.15       | 121 | 633.39       | 121 | (10.00)    | -   |
| 605       | 502       | V   | K8119b | 2-methylheptan-4-one            | 626-33-5   | 0.01         | 319.27     | -                                     | -   | 43.50                                       | 121 | -            | -   | 427.15       | 121 | 633.39       | 121 | (10.00)    | -   |
| 606       | 503       | V   | K8120a | 6-methylheptan-3-one            | 624-42-0   | 1.0          | 293.15     | 830.40                                | 120 | -                                           | -   | -            | -   | 437.15       | 121 | 633.39       | 121 | (10.00)    | -   |
| 607       | 504       | V   | K8122a | 5-methylheptan-2-one            | 18217-12-4 | 1.0          | 298.15     | 811.00                                | 117 | -                                           | -   | -            | -   | 437.00       | 121 | 633.39       | 121 | (10.00)    | -   |
| 608       | 504       | V   | K8122b | 5-methylheptan-2-one            | 18217-12-4 | 0.01         | 327.15     | -                                     | -   | 44.24                                       | 121 | -            | -   | 437.00       | 121 | 633.39       | 121 | (10.00)    | -   |
| 609       | 505       | V   | K8123a | 6-methylheptan-2-one            | 928-68-7   | 1.0          | 298.15     | 810.00                                | 117 | -                                           | -   | -            | -   | 440.15       | 121 | 633.39       | 121 | (10.00)    | -   |
| 610       | 505       | V   | K8123b | 6-methylheptan-2-one            | 928-68-7   | 0.01         | 329.67     | -                                     | -   | 46.31                                       | 121 | -            | -   | 440.15       | 121 | 633.39       | 121 | (10.00)    | -   |
| 611       | 506       | V   | K8124a | octan-4-one                     | 589-63-9   | 1.0          | 298.15     | 814.72                                | 117 | -                                           | -   | -            | -   | 436.15       | 121 | 633.39       | 121 | (10.00)    | -   |
| 612       | 506       | V   | K8124b | octan-4-one                     | 589-63-9   | 0.01         | 326.47     | -                                     | -   | 45.47                                       | 121 | -            | -   | 436.15       | 121 | 633.39       | 121 | (10.00)    | -   |
| 613       | 507       | V   | K8125a | octan-3-one                     | 106-68-3   | 1.0          | 298.15     | 822.00                                | 120 | -                                           | -   | -            | -   | 440.65       | 121 | 633.39       | 121 | 10.50      | 120 |
| 614       | 507       | V   | K8125b | octan-3-one                     | 106-68-3   | 1.0          | 308.0      | -                                     | -   | 43.80                                       | 114 | -            | -   | 440.65       | 121 | 633.39       | 121 | 10.50      | 120 |
| 615       | 508       | V   | K8126a | octan-2-one                     | 111-13-7   | 1.0          | 298.15     | 815.25                                | 117 | 51.80                                       | 114 | 252.84       | 120 | 445.75       | 121 | 632.70       | 121 | 9.51       | 120 |
| 616       | 509       | V   | K9101a | 2,2,4,4-tetramethylpentan-3-one | 815-24-7   | 1.0          | 298.15     | 820.20                                | 117 | 45.40                                       | 114 | 247.95       | 120 | 425.15       | 121 | 653.74       | 121 | 10.0       | 120 |
| 617       | 510       | V   | K9102a | 2,2,5-trimethylhexan-3-one      | 14705-50-1 | 1.0          | 296.15     | 812.00                                | 117 | -                                           | -   | -            | -   | -            | -   | -            | -   | (9.91)     | -   |
| 618       | 511       | V   | K9103a | 2,2-dimethylheptan-3-one        | 19078-97-8 | 1.0          | 293.15     | 816.80                                | 117 | -                                           | -   | -            | -   | -            | -   | -            | -   | (9.91)     | -   |
| 619       | 512       | V   | K9104a | 2,2-dimethylheptan-4-one        | 1762-19-2  | 1.0          | 298.15     | 809.00                                | 117 | -                                           | -   | -            | -   | -            | -   | -            | -   | (9.91)     | -   |
| 620       | 513       | V   | K9105a | 3,5-dimethylheptan-4-one        | 19549-84-9 | 1.0          | 287.15     | 826.00                                | 117 | -                                           | -   | -            | -   | 435.15       | 121 | 653.74       | 121 | (9.91)     | -   |
| 621       | 513       | V   | K9105b | 3,5-dimethylheptan-4-one        | 19549-84-9 | 0.01         | 325.67     | -                                     | -   | 44.19                                       | 121 | -            | -   | 435.15       | 121 | 653.74       | 121 | (9.91)     | -   |

Table S.1 – Reference experimental data (continued)

| $n_{sim}$ | $n_{iso}$ | Set | Code   | Name                            | CAS         | $P$<br>[bar] | $T$<br>[K] | $\rho_{liq}$<br>[kg·m <sup>-3</sup> ] | Src | $\Delta H_{vap}$<br>[kJ·mol <sup>-1</sup> ] | Src | $T_m$<br>[K] | Src | $T_b$<br>[K] | Src | $T_c$<br>[K] | Src | $\epsilon$ | Src |
|-----------|-----------|-----|--------|---------------------------------|-------------|--------------|------------|---------------------------------------|-----|---------------------------------------------|-----|--------------|-----|--------------|-----|--------------|-----|------------|-----|
| 622       | 514       | V   | K9106a | 2,6-dimethylheptan-3-one        | 19549-83-8  | 1.0          | 298.15     | 813.50                                | 117 | -                                           | -   | -            | -   | 445.00       | 121 | 653.74       | 121 | (9.91)     | -   |
| 623       | 514       | V   | K9106b | 2,6-dimethylheptan-3-one        | 19549-83-8  | 0.01         | 333.55     | -                                     | -   | 45.65                                       | 121 | -            | -   | 445.00       | 121 | 653.74       | 121 | (9.91)     | -   |
| 624       | 515       | V   | K9107a | 2,6-dimethylheptan-4-one        | 108-83-8    | 1.0          | 298.15     | 802.43                                | 117 | 50.90                                       | 114 | 227.15       | 120 | 441.41       | 121 | 653.74       | 121 | 9.91       | 120 |
| 625       | 516       | V   | K9108a | 5,6-dimethylheptan-2-one        | 2867-76-7   | 1.0          | 293.15     | 833.50                                | 117 | -                                           | -   | -            | -   | -            | -   | -            | -   | (9.91)     | -   |
| 626       | 517       | V   | K9109a | 4,6-dimethylheptan-2-one        | 19549-80-5  | 1.0          | 298.15     | 817.00                                | 117 | -                                           | -   | -            | -   | -            | -   | -            | -   | (9.91)     | -   |
| 627       | 518       | V   | K9110a | 3-methyloctan-4-one             | 20754-04-5  | 1.0          | 287.15     | 829.00                                | 117 | -                                           | -   | -            | -   | 447.15       | 121 | 653.74       | 121 | (9.91)     | -   |
| 628       | 518       | V   | K9110b | 3-methyloctan-4-one             | 20754-04-5  | 0.01         | 335.27     | -                                     | -   | 45.95                                       | 121 | -            | -   | 447.15       | 121 | 653.74       | 121 | (9.91)     | -   |
| 629       | 519       | V   | K9111a | 4-methyloctan-3-one             | 6137-15-1   | 1.0          | 298.15     | 820.00                                | 117 | -                                           | -   | -            | -   | 456.62       | 121 | 653.74       | 121 | (9.91)     | -   |
| 630       | 520       | V   | K9112a | 2-methyloctan-3-one             | 923-28-4    | 1.0          | 293.15     | 821.20                                | 117 | -                                           | -   | -            | -   | 456.00       | 121 | 653.74       | 121 | (9.91)     | -   |
| 631       | 520       | V   | K9112b | 2-methyloctan-3-one             | 923-28-4    | 0.01         | 342.35     | -                                     | -   | 47.36                                       | 121 | -            | -   | 456.00       | 121 | 653.74       | 121 | (9.91)     | -   |
| 632       | 521       | V   | K9113a | 3-ethylheptan-2-one             | 6137-09-3   | 1.0          | 293.15     | 824.60                                | 117 | -                                           | -   | -            | -   | -            | -   | -            | -   | (9.91)     | -   |
| 633       | 522       | V   | K9114a | 3-methyloctan-2-one             | 6137-08-2   | 1.0          | 300.15     | 832.00                                | 117 | -                                           | -   | -            | -   | 456.62       | 121 | 653.74       | 121 | (9.91)     | -   |
| 634       | 523       | V   | K9115a | 2-methyloctan-4-one             | 7492-38-8   | 1.0          | 298.15     | 815.00                                | 117 | -                                           | -   | -            | -   | -            | -   | 653.74       | 121 | (9.91)     | -   |
| 635       | 524       | V   | K9116a | 7-methyloctan-4-one             | 20809-46-5  | 1.0          | 293.15     | 823.90                                | 117 | -                                           | -   | -            | -   | 451.15       | 121 | 653.74       | 121 | (9.91)     | -   |
| 636       | 524       | V   | K9116b | 7-methyloctan-4-one             | 20809-46-5  | 0.01         | 338.47     | -                                     | -   | 46.57                                       | 121 | -            | -   | 451.15       | 121 | 653.74       | 121 | (9.91)     | -   |
| 637       | 525       | V   | K9120a | 6-methyloctan-2-one             | 925-69-9    | 1.0          | 298.15     | 822.00                                | 117 | -                                           | -   | -            | -   | -            | -   | 653.74       | 121 | (9.91)     | -   |
| 638       | 526       | V   | K9121a | nonan-5-one                     | 502-56-7    | 1.0          | 298.15     | 817.77                                | 117 | 53.30                                       | 114 | 269.31       | 120 | 461.60       | 121 | 640.00       | 121 | 10.6       | 120 |
| 639       | 527       | V   | K9122a | nonan-4-one                     | 4485-09-0   | 1.0          | 298.15     | 819.68                                | 117 | -                                           | -   | -            | -   | 460.65       | 121 | 653.74       | 121 | (9.91)     | -   |
| 640       | 527       | V   | K9122b | nonan-4-one                     | 4485-09-0   | 0.01         | 346.07     | -                                     | -   | 48.12                                       | 121 | -            | -   | 460.65       | 121 | 653.74       | 121 | (9.91)     | -   |
| 641       | 528       | V   | K9123a | nonan-3-one                     | 925-78-0    | 1.0          | 298.15     | 820.44                                | 117 | 55.60                                       | 114 | 265.15       | 120 | 463.15       | 121 | 653.74       | 121 | (9.91)     | -   |
| 642       | 529       | V   | K9124a | nonan-2-one                     | 821-55-6    | 1.0          | 298.15     | 817.78                                | 117 | -                                           | -   | -            | -   | 265.75       | 120 | 467.15       | 121 | 9.14       | 120 |
| 643       | 529       | V   | K9124b | nonan-2-one                     | 821-55-6    | 0.01         | 351.27     | -                                     | -   | 49.41                                       | 121 | 265.75       | 120 | 467.15       | 121 | 652.50       | 121 | 9.14       | 120 |
| 644       | 530       | V   | K0101a | 2,2,5,5-tetramethylhexan-3-one  | 868-91-7    | 1.0          | 298.15     | 816.90                                | 117 | 48.80                                       | 114 | -            | -   | -            | -   | -            | -   | (8.30)     | -   |
| 645       | 531       | V   | K0102a | 4-ethyl-2,2-dimethylhexan-3-one | 40239-63-2  | 1.0          | 298.15     | 825.20                                | 117 | -                                           | -   | -            | -   | -            | -   | -            | -   | (8.30)     | -   |
| 646       | 532       | V   | K0103a | 4,6,6-trimethylheptan-2-one     | 40239-01-8  | 1.0          | 288.65     | 825.20                                | 117 | -                                           | -   | -            | -   | -            | -   | -            | -   | (8.30)     | -   |
| 647       | 533       | V   | K0104a | 2,2-dimethyloctan-3-one         | 5340-64-7   | 1.0          | 293.15     | 832.00                                | 117 | -                                           | -   | -            | -   | -            | -   | -            | -   | (8.30)     | -   |
| 648       | 534       | V   | K0105a | 2,2-dimethyloctan-4-one         | 22319-52-4  | 1.0          | 293.15     | 814.30                                | 117 | -                                           | -   | -            | -   | -            | -   | -            | -   | (8.30)     | -   |
| 649       | 535       | V   | K0106a | 2-methylnonan-3-one             | 5445-31-8   | 1.0          | 293.15     | 822.60                                | 117 | -                                           | -   | -            | -   | 473.00       | 121 | 672.74       | 121 | (8.30)     | -   |
| 650       | 535       | V   | K0106b | 2-methylnonan-3-one             | 5445-31-8   | 0.01         | 355.95     | -                                     | -   | 49.44                                       | 121 | -            | -   | 473.00       | 121 | 672.74       | 121 | (8.30)     | -   |
| 651       | 536       | V   | K0107a | 2-methylnonan-4-one             | 6627-76-5   | 1.0          | 298.15     | 818.00                                | 117 | -                                           | -   | -            | -   | -            | -   | -            | -   | (8.30)     | -   |
| 652       | 537       | V   | K0108a | 2-methylnonan-5-one             | 22287-02-1  | 1.0          | 293.15     | 821.30                                | 117 | -                                           | -   | -            | -   | 476.65       | 121 | 672.74       | 121 | (8.30)     | -   |
| 653       | 537       | V   | K0108b | 2-methylnonan-5-one             | 22287-02-1  | 0.01         | 358.87     | -                                     | -   | 50.05                                       | 121 | -            | -   | 476.65       | 121 | 672.74       | 121 | (8.30)     | -   |
| 654       | 538       | V   | K0109a | 6-methylnonan-2-one             | 104092-42-4 | 1.0          | 293.15     | 838.40                                | 117 | -                                           | -   | -            | -   | -            | -   | -            | -   | (8.30)     | -   |
| 655       | 539       | V   | K0110a | decan-5-one                     | 820-29-1    | 1.0          | 298.15     | 820.55                                | 117 | -                                           | -   | -            | -   | 477.05       | 121 | 672.74       | 121 | (8.30)     | -   |
| 656       | 539       | V   | K0110b | decan-5-one                     | 820-29-1    | 0.01         | 359.19     | -                                     | -   | 50.09                                       | 121 | -            | -   | 477.05       | 121 | 672.74       | 121 | (8.30)     | -   |
| 657       | 540       | V   | K0111a | decan-4-one                     | 624-16-8    | 1.0          | 293.65     | 822.00                                | 117 | -                                           | -   | 264.15       | 120 | 479.65       | 121 | 672.74       | 121 | (8.30)     | -   |
| 658       | 540       | V   | K0111b | decan-4-one                     | 624-16-8    | 0.01         | 361.27     | -                                     | -   | 50.54                                       | 121 | 264.15       | 120 | 479.65       | 121 | 672.74       | 121 | (8.30)     | -   |
| 659       | 541       | V   | K0112a | decan-3-one                     | 928-80-3    | 1.0          | 298.15     | 821.92                                | 117 | -                                           | -   | 275.15       | 120 | 476.15       | 121 | 672.74       | 121 | (8.30)     | -   |
| 660       | 541       | V   | K0112b | decan-3-one                     | 928-80-3    | 0.01         | 358.47     | -                                     | -   | 50.28                                       | 121 | 275.15       | 120 | 476.15       | 121 | 672.74       | 121 | (8.30)     | -   |
| 661       | 542       | V   | K0113a | decan-2-one                     | 693-54-9    | 1.0          | 298.15     | 820.10                                | 117 | 60.90                                       | 114 | 287.15       | 120 | 483.35       | 121 | 672.74       | 121 | 8.3        | 120 |
| 662       | 543       | V   | K7201a | 3,3-dimethylpentane-2,4-dione   | 3142-58-3   | 0.01         | 333.97     | 923.27                                | 121 | -                                           | -   | -            | -   | 446.15       | 121 | 645.00       | 121 | (15.28)    | -   |
| 663       | 544       | V   | K7202a | 5-methylhexane-2,3-dione        | 13706-86-0  | 1.0          | 295.15     | 908.00                                | 120 | -                                           | -   | -            | -   | 411.15       | 121 | 645.00       | 121 | (15.28)    | -   |
| 664       | 545       | V   | K7203a | 3-ethylpentane-2,4-dione        | 1540-34-7   | 1.0          | 292.15     | 953.10                                | 120 | -                                           | -   | -            | -   | 451.65       | 121 | 645.00       | 121 | (15.28)    | -   |
| 665       | 546       | V   | K7204a | 3-methylhexane-2,5-dione        | 4437-50-7   | 0.01         | 352.37     | 902.85                                | 121 | -                                           | -   | -            | -   | 469.15       | 121 | 645.00       | 121 | (15.28)    | -   |
| 666       | 547       | V   | K7205a | heptane-2,3-dione               | 96-04-8     | 1.0          | 291.15     | 919.00                                | 120 | -                                           | -   | -            | -   | 417.15       | 121 | 645.00       | 121 | (15.28)    | -   |
| 667       | 548       | V   | K7206a | heptane-3,5-dione               | 7424-54-6   | 1.0          | 293.15     | 945.00                                | 120 | -                                           | -   | -            | -   | 449.15       | 121 | 645.00       | 121 | (15.28)    | -   |
| 668       | 549       | V   | K7207a | heptane-2,4-dione               | 7307-02-0   | 1.0          | 447.2      | -                                     | -   | 38.84                                       | 121 | -            | -   | 447.20       | 121 | -            | -   | (15.28)    | -   |
| 669       | 550       | V   | K7208a | heptane-2,6-dione               | 13505-34-5  | 0.01         | 373.17     | 885.33                                | 121 | -                                           | -   | -            | -   | 495.15       | 121 | 645.00       | 121 | (15.28)    | -   |

Table S.1 – Reference experimental data (continued)

| $n_{\text{sim}}$ | $n_{\text{iso}}$ | Set | Code   | Name                                | CAS        | $P$<br>[bar] | $T$<br>[K] | $\rho_{\text{liq}}$<br>[kg·m <sup>-3</sup> ] | Src | $\Delta H_{\text{vap}}$<br>[kJ·mol <sup>-1</sup> ] | Src | $T_m$<br>[K] | Src | $T_b$<br>[K] | Src | $T_c$<br>[K] | Src | $\epsilon$ | Src |
|------------------|------------------|-----|--------|-------------------------------------|------------|--------------|------------|----------------------------------------------|-----|----------------------------------------------------|-----|--------------|-----|--------------|-----|--------------|-----|------------|-----|
| 670              | 551              | V   | K8202a | 2,5-dimethylhexane-3,4-dione        | 4388-87-8  | 0.01         | 311.17     | 909.01                                       | 121 | 41.82                                              | 121 | -            | -   | 417.65       | 121 | 648.00       | 121 | (15.28)    | -   |
| 671              | 552              | V   | K8206a | octane-4,5-dione                    | 5455-24-3  | 0.01         | 329.97     | 907.83                                       | 121 | 45.27                                              | 121 | -            | -   | 441.15       | 121 | 648.00       | 121 | (15.28)    | -   |
| 672              | 553              | V   | K8207a | octane-2,4-dione                    | 14090-87-0 | 0.01         | 350.77     | 882.20                                       | 121 | -                                                  | -   | -            | -   | 467.15       | 121 | 648.00       | 121 | (15.28)    | -   |
| 673              | 554              | V   | K9201a | 2,6-dimethylheptane-3,5-dione       | 18362-64-6 | 1.0          | 298.0      | -                                            | -   | 56.10                                              | 114 | -            | -   | 339.15       | 121 | -            | -   | (15.28)    | -   |
| 674              | 555              | V   | K9202a | nonane-2,4-dione                    | 6175-23-1  | 0.01         | 351.39     | 893.69                                       | 121 | -                                                  | -   | -            | -   | 467.93       | 121 | 680.91       | 121 | (15.28)    | -   |
| 675              | 556              | V   | K0201a | 2,2,5,5-tetramethylhexane-3,4-dione | 4388-88-9  | 1.0          | 442.15     | -                                            | -   | 38.35                                              | 121 | -            | -   | 442.15       | 121 | -            | -   | (15.28)    | -   |
| 676              | 557              | V   | K0202a | 2,2,6-trimethylheptane-3,5-dione    | 7333-23-5  | 1.0          | 298.0      | -                                            | -   | 57.70                                              | 114 | -            | -   | -            | -   | -            | -   | (15.28)    | -   |
| 677              | 558              | V   | K7301a | 3-acetylpentane-2,4-dione           | 815-68-9   | 1.0          | 384.0      | -                                            | -   | 54.90                                              | 114 | -            | -   | 476.65       | 121 | -            | -   | (15.0)     | -   |
| 678              | 559              | V   | K7302a | heptane-2,4,6-trione                | 626-53-9   | 1.0          | 313.15     | 1059.90                                      | 120 | -                                                  | -   | 322.15       | 120 | 455.78       | 121 | -            | -   | (15.0)     | -   |
| 679              | 559              | V   | K7302b | heptane-2,4,6-trione                | 626-53-9   | 1.0          | 455.78     | -                                            | -   | 39.65                                              | 121 | 322.15       | 120 | 455.78       | 121 | -            | -   | (15.0)     | -   |
| 680              | 560              | V   | E7201a | ethyl 2,2-dimethylpropanoate        | 3938-95-2  | 1.0          | 298.15     | 849.50                                       | 116 | 41.30                                              | 114 | 183.65       | 120 | 391.55       | 121 | -            | -   | (4.67)     | -   |
| 681              | 561              | V   | E7202a | methyl 3,3-dimethylbutanoate        | 10250-48-3 | 1.0          | 293.15     | 870.00                                       | 116 | 43.90                                              | 114 | -            | -   | -            | -   | -            | -   | (4.67)     | -   |
| 682              | 562              | V   | E7203a | 2,2-dimethylpropyl acetate          | 926-41-0   | 1.0          | 298.15     | 853.90                                       | 116 | -                                                  | -   | -            | -   | -            | -   | 586.34       | 121 | (4.67)     | -   |
| 683              | 562              | V   | E7203b | 2,2-dimethylpropyl acetate          | 926-41-0   | 0.01         | 300.07     | -                                            | -   | 43.46                                              | 121 | -            | -   | -            | -   | 586.34       | 121 | (4.67)     | -   |
| 684              | 563              | V   | E7204a | 2-methylbutan-2-yl acetate          | 625-16-1   | 1.0          | 297.85     | 872.50                                       | 116 | 40.30                                              | 114 | -            | -   | -            | -   | -            | -   | (4.67)     | -   |
| 685              | 564              | V   | E7205a | tert-butyl propanoate               | 20487-40-5 | 1.0          | 293.15     | 864.70                                       | 116 | -                                                  | -   | -            | -   | 414.55       | 121 | -            | -   | (4.67)     | -   |
| 686              | 564              | V   | E7205b | tert-butyl propanoate               | 20487-40-5 | 1.0          | 414.55     | -                                            | -   | 41.09                                              | 121 | -            | -   | 414.55       | 121 | -            | -   | (4.67)     | -   |
| 687              | 565              | V   | E7206a | propan-2-yl 2-methylpropanoate      | 617-50-5   | 1.0          | 294.5      | 846.74                                       | 116 | -                                                  | -   | -            | -   | 396.15       | 120 | -            | -   | (4.67)     | -   |
| 688              | 565              | V   | E7206b | propan-2-yl 2-methylpropanoate      | 617-50-5   | 1.0          | 272.0      | -                                            | -   | 43.30                                              | 114 | -            | -   | 396.15       | 120 | -            | -   | (4.67)     | -   |
| 689              | 566              | V   | E7207a | 3-methylbutan-2-yl acetate          | 5343-96-4  | 1.0          | 298.15     | 866.00                                       | 116 | -                                                  | -   | -            | -   | 401.65       | 121 | 586.34       | 121 | (4.67)     | -   |
| 690              | 567              | V   | E7208a | methyl 2-ethylbutanoate             | 816-11-5   | 1.0          | 293.15     | 879.70                                       | 116 | -                                                  | -   | -            | -   | 409.15       | 121 | 586.34       | 121 | (4.67)     | -   |
| 691              | 568              | V   | E7209a | methyl 2-methylpentanoate           | 2177-77-7  | 1.0          | 293.15     | 876.50                                       | 116 | -                                                  | -   | -            | -   | -            | -   | -            | -   | (4.67)     | -   |
| 692              | 569              | V   | E7210a | ethyl 2-methylbutanoate             | 7452-79-1  | 1.0          | 293.15     | 867.80                                       | 116 | 44.70                                              | 114 | -            | -   | -            | -   | -            | -   | (4.67)     | -   |
| 693              | 570              | V   | E7211a | propyl 2-methylpropanoate           | 644-49-5   | 1.0          | 298.15     | 859.46                                       | 116 | -                                                  | -   | -            | -   | 407.15       | 120 | -            | -   | (4.67)     | -   |
| 694              | 570              | V   | E7211b | propyl 2-methylpropanoate           | 644-49-5   | 1.0          | 282.0      | -                                            | -   | 50.50                                              | 114 | -            | -   | 407.15       | 120 | -            | -   | (4.67)     | -   |
| 695              | 571              | V   | E7212a | ethyl 3-methylbutanoate             | 108-64-5   | 1.0          | 298.15     | 861.23                                       | 116 | -                                                  | -   | 173.85       | 120 | 408.15       | 120 | -            | -   | 4.71       | 120 |
| 696              | 571              | V   | E7212b | ethyl 3-methylbutanoate             | 108-64-5   | 1.0          | 282.0      | -                                            | -   | 44.50                                              | 114 | 173.85       | 120 | 408.15       | 120 | -            | -   | 4.71       | 120 |
| 697              | 572              | V   | E7213a | 2-methylpropyl propanoate           | 540-42-1   | 1.0          | 298.15     | 867.52                                       | 116 | -                                                  | -   | 201.75       | 120 | 409.15       | 120 | 592.00       | 121 | (4.67)     | -   |
| 698              | 572              | V   | E7213b | 2-methylpropyl propanoate           | 540-42-1   | 1.0          | 286.0      | -                                            | -   | 44.90                                              | 114 | 201.75       | 120 | 409.15       | 120 | 592.00       | 121 | (4.67)     | -   |
| 699              | 573              | V   | E7214a | butan-2-yl propanoate               | 591-34-4   | 1.0          | 298.15     | 861.25                                       | 116 | -                                                  | -   | -            | -   | 406.15       | 120 | -            | -   | (4.67)     | -   |
| 700              | 574              | V   | E7215a | propan-2-yl butanoate               | 638-11-9   | 1.0          | 298.15     | 853.92                                       | 116 | -                                                  | -   | -            | -   | 402.15       | 120 | -            | -   | (4.67)     | -   |
| 701              | 575              | V   | E7216a | 2-methylbutyl acetate               | 624-41-9   | 1.0          | 293.15     | 867.80                                       | 116 | -                                                  | -   | -            | -   | 413.15       | 121 | 586.34       | 121 | (4.67)     | -   |
| 702              | 575              | V   | E7216b | 2-methylbutyl acetate               | 624-41-9   | 0.01         | 309.67     | -                                            | -   | 42.89                                              | 121 | -            | -   | 413.15       | 121 | 586.34       | 121 | (4.67)     | -   |
| 703              | 576              | V   | E7217a | pentan-3-yl acetate                 | 620-11-1   | 0.01         | 303.27     | 861.47                                       | 121 | 41.83                                              | 121 | -            | -   | 405.15       | 121 | 586.34       | 121 | (4.67)     | -   |
| 704              | 577              | V   | E7218a | 3-methylbutyl acetate               | 123-92-2   | 1.0          | 298.75     | 864.80                                       | 116 | 46.40                                              | 114 | 194.65       | 120 | 414.75       | 120 | 586.10       | 121 | 4.72       | 120 |
| 705              | 578              | V   | E7219a | pentan-2-yl acetate                 | 626-38-0   | 1.0          | 298.15     | 863.07                                       | 116 | -                                                  | -   | -            | -   | 406.15       | 121 | 586.34       | 121 | (4.67)     | -   |
| 706              | 578              | V   | E7219b | pentan-2-yl acetate                 | 626-38-0   | 0.01         | 304.07     | -                                            | -   | 41.99                                              | 121 | -            | -   | 406.15       | 121 | 586.34       | 121 | (4.67)     | -   |
| 707              | 579              | V   | E7220a | methyl hexanoate                    | 106-70-7   | 1.0          | 298.15     | 880.40                                       | 116 | 47.70                                              | 114 | 203.15       | 120 | 422.65       | 121 | 586.34       | 121 | 4.615      | 120 |
| 708              | 580              | V   | E7221a | ethyl pentanoate                    | 539-82-2   | 1.01         | 298.15     | 869.42                                       | 118 | 47.00                                              | 114 | 181.95       | 120 | 419.25       | 121 | 586.34       | 121 | 4.71       | 120 |
| 709              | 581              | V   | E7222a | propyl butanoate                    | 105-66-8   | 1.0          | 298.15     | 868.23                                       | 116 | -                                                  | -   | 177.95       | 120 | 416.45       | 121 | 593.70       | 121 | 4.3        | 120 |
| 710              | 581              | V   | E7222b | propyl butanoate                    | 105-66-8   | 1.0          | 286.0      | -                                            | -   | 44.30                                              | 114 | 177.95       | 120 | 416.45       | 121 | 593.70       | 121 | 4.3        | 120 |
| 711              | 582              | V   | E7223a | butyl propanoate                    | 590-01-2   | 1.0          | 298.15     | 871.54                                       | 116 | 48.50                                              | 114 | 183.65       | 120 | 419.75       | 121 | 594.60       | 121 | 4.838      | 120 |
| 712              | 583              | V   | E7224a | pentyl acetate                      | 628-63-7   | 1.0          | 298.15     | 872.23                                       | 116 | 48.60                                              | 114 | 202.25       | 120 | 422.15       | 121 | 599.90       | 121 | 4.79       | 120 |
| 713              | 584              | V   | E8201a | propan-2-yl 2,2-dimethylpropanoate  | 5129-36-2  | 1.0          | 293.15     | 830.00                                       | 116 | -                                                  | -   | -            | -   | -            | -   | -            | -   | (4.48)     | -   |
| 714              | 585              | V   | E8202a | methyl 2,3,3-trimethylbutanoate     | 19910-30-6 | 1.0          | 298.15     | 874.90                                       | 116 | -                                                  | -   | -            | -   | -            | -   | -            | -   | (4.48)     | -   |
| 715              | 586              | V   | E8203a | tert-butyl 2-methylpropanoate       | 16889-72-8 | 1.0          | 399.85     | -                                            | -   | 30.47                                              | 121 | -            | -   | 399.85       | 121 | -            | -   | (4.48)     | -   |
| 716              | 587              | V   | E8204a | ethyl 2,2-dimethylbutanoate         | 5129-40-8  | 1.0          | 277.15     | 883.00                                       | 116 | -                                                  | -   | -            | -   | -            | -   | -            | -   | (4.48)     | -   |
| 717              | 588              | V   | E8205a | 3-methylpentan-3-yl acetate         | 10250-47-2 | 0.01         | 316.07     | 860.15                                       | 121 | -                                                  | -   | -            | -   | 421.15       | 121 | 606.49       | 121 | (4.48)     | -   |

Table S.1 – Reference experimental data (continued)

| $n_{\text{sim}}$ | $n_{\text{iso}}$ | Set | Code   | Name                                  | CAS         | $P$<br>[bar] | $T$<br>[K] | $\rho_{\text{liq}}$<br>[kg·m <sup>-3</sup> ] | Src            | $\Delta H_{\text{vap}}$<br>[kJ·mol <sup>-1</sup> ] | Src            | $T_m$<br>[K] | Src            | $T_b$<br>[K] | Src            | $T_c$<br>[K] | Src            | $\epsilon$ | Src            |
|------------------|------------------|-----|--------|---------------------------------------|-------------|--------------|------------|----------------------------------------------|----------------|----------------------------------------------------|----------------|--------------|----------------|--------------|----------------|--------------|----------------|------------|----------------|
| 718              | 589              | V   | E8206a | ethyl 3,3-dimethylbutanoate           | 5340-78-3   | 1.0          | 293.15     | 860.40                                       | <sup>116</sup> | -                                                  | -              | -            | -              | -            | -              | -            | -              | (4.48)     | -              |
| 719              | 590              | V   | E8208a | 3,3-dimethylbutyl acetate             | 1421-87-0   | 1.0          | 293.15     | 867.90                                       | <sup>116</sup> | -                                                  | -              | -            | -              | -            | -              | -            | -              | (4.48)     | -              |
| 720              | 591              | V   | E8209b | 2-methylbutan-2-yl propanoate         | 34949-22-9  | 1.0          | 298.0      | -                                            | -              | 45.70                                              | <sup>114</sup> | -            | -              | 437.43       | <sup>121</sup> | 606.49       | <sup>121</sup> | (4.48)     | -              |
| 721              | 592              | V   | E8210b | 2-methylpentan-2-yl acetate           | 34859-98-8  | 1.0          | 298.0      | -                                            | -              | 45.60                                              | <sup>114</sup> | -            | -              | 426.15       | <sup>121</sup> | 606.49       | <sup>121</sup> | (4.48)     | -              |
| 722              | 593              | V   | E8211a | tert-butyl butanoate                  | 2308-38-5   | 1.0          | 409.15     | -                                            | -              | 36.39                                              | <sup>121</sup> | -            | -              | 409.15       | <sup>121</sup> | -            | -              | (4.48)     | -              |
| 723              | 594              | V   | E8212a | ethyl 2,3-dimethylbutanoate           | 54004-42-1  | 1.0          | 298.15     | 866.00                                       | <sup>116</sup> | -                                                  | -              | -            | -              | -            | -              | -            | -              | (4.48)     | -              |
| 724              | 595              | V   | E8213a | 2-methylpropyl 2-methylpropanoate     | 97-85-8     | 1.0          | 293.15     | 847.00                                       | <sup>116</sup> | 48.50                                              | <sup>114</sup> | 192.55       | <sup>120</sup> | 421.15       | <sup>120</sup> | -            | -              | (4.48)     | -              |
| 725              | 596              | V   | E8214a | butan-2-yl 2-methylpropanoate         | 23412-21-7  | 1.0          | 289.15     | 870.00                                       | <sup>116</sup> | -                                                  | -              | -            | -              | -            | -              | 606.49       | <sup>121</sup> | (4.48)     | -              |
| 726              | 597              | V   | E8216a | propan-2-yl 3-methylbutanoate         | 32665-23-9  | 1.0          | 298.15     | 846.10                                       | <sup>116</sup> | -                                                  | -              | -            | -              | 420.15       | <sup>120</sup> | -            | -              | (4.48)     | -              |
| 727              | 598              | V   | E8217a | 2-methylpentan-3-yl acetate           | 35897-16-6  | 0.01         | 316.87     | 846.63                                       | <sup>121</sup> | -                                                  | -              | -            | -              | 422.15       | <sup>121</sup> | 606.49       | <sup>121</sup> | (4.48)     | -              |
| 728              | 599              | V   | E8218a | 4-methylpentan-2-yl acetate           | 108-84-9    | 1.0          | 298.15     | 880.50                                       | <sup>120</sup> | -                                                  | -              | -            | -              | 420.65       | <sup>120</sup> | -            | -              | (4.48)     | -              |
| 729              | 600              | V   | E8219a | methyl 2-ethylpentanoate              | 816-16-0    | 1.0          | 293.15     | 875.00                                       | <sup>116</sup> | -                                                  | -              | -            | -              | -            | -              | -            | -              | (4.48)     | -              |
| 730              | 601              | V   | E8220a | ethyl 2-ethylbutanoate                | 2983-38-2   | 1.0          | 293.15     | 863.30                                       | <sup>116</sup> | -                                                  | -              | -            | -              | -            | -              | -            | -              | (4.48)     | -              |
| 731              | 602              | V   | E8221a | ethyl 2-methylpentanoate              | 39255-32-8  | 1.0          | 293.15     | 876.50                                       | <sup>116</sup> | 48.40                                              | <sup>114</sup> | -            | -              | 428.3        | <sup>118</sup> | -            | -              | (4.48)     | -              |
| 732              | 602              | V   | E8221b | ethyl 2-methylpentanoate              | 39255-32-8  | 1.0          | 298.15     | -                                            | -              | 48.40                                              | <sup>118</sup> | -            | -              | 428.3        | <sup>118</sup> | -            | -              | (4.48)     | -              |
| 733              | 603              | V   | E8222a | propyl 2-methylbutanoate              | 37064-20-3  | 1.0          | 293.15     | 869.70                                       | <sup>116</sup> | -                                                  | -              | -            | -              | -            | -              | -            | -              | (4.48)     | -              |
| 734              | 604              | V   | E8223a | butyl 2-methylpropanoate              | 97-87-0     | 1.0          | 298.15     | 857.37                                       | <sup>116</sup> | -                                                  | -              | -            | -              | -            | -              | -            | -              | (4.48)     | -              |
| 735              | 605              | V   | E8224a | ethyl 3-methylpentanoate              | 5870-68-8   | 1.0          | 293.15     | 878.00                                       | <sup>116</sup> | -                                                  | -              | -            | -              | -            | -              | -            | -              | (4.48)     | -              |
| 736              | 606              | V   | E8225a | propyl 3-methylbutanoate              | 557-00-6    | 1.0          | 298.15     | 857.48                                       | <sup>116</sup> | 44.30                                              | <sup>114</sup> | -            | -              | 429.05       | <sup>121</sup> | -            | -              | (4.48)     | -              |
| 737              | 607              | V   | E8227a | ethyl 4-methylpentanoate              | 25415-67-2  | 1.0          | 293.15     | 870.50                                       | <sup>120</sup> | -                                                  | -              | -            | -              | 436.15       | <sup>121</sup> | 606.49       | <sup>121</sup> | (4.48)     | -              |
| 738              | 607              | V   | E8227b | ethyl 4-methylpentanoate              | 25415-67-2  | 1.0          | 299.0      | -                                            | -              | 45.40                                              | <sup>114</sup> | -            | -              | 436.15       | <sup>121</sup> | 606.49       | <sup>121</sup> | (4.48)     | -              |
| 739              | 608              | V   | E8228a | 2-methylpropyl butanoate              | 539-90-2    | 1.0          | 298.15     | 860.60                                       | <sup>116</sup> | -                                                  | -              | -            | -              | 430.15       | <sup>120</sup> | 611.00       | <sup>121</sup> | (4.48)     | -              |
| 740              | 608              | V   | E8228b | 2-methylpropyl butanoate              | 539-90-2    | 1.0          | 292.0      | -                                            | -              | 41.70                                              | <sup>114</sup> | -            | -              | 430.15       | <sup>120</sup> | 611.00       | <sup>121</sup> | (4.48)     | -              |
| 741              | 609              | V   | E8229a | 3-methylbutyl propanoate              | 105-68-0    | 1.0          | 298.15     | 865.00                                       | <sup>116</sup> | 44.10                                              | <sup>114</sup> | -            | -              | 446.15       | <sup>120</sup> | 606.49       | <sup>121</sup> | 5.21       | <sup>120</sup> |
| 742              | 610              | V   | E8230a | butan-2-yl butanoate                  | 819-97-6    | 1.0          | 298.15     | 863.24                                       | <sup>116</sup> | -                                                  | -              | -            | -              | -            | -              | -            | -              | (4.48)     | -              |
| 743              | 611              | V   | E8231a | pentan-2-yl propanoate                | 54004-43-2  | 1.0          | 298.15     | 861.28                                       | <sup>116</sup> | -                                                  | -              | -            | -              | 440.22       | <sup>121</sup> | 606.49       | <sup>121</sup> | (4.48)     | -              |
| 744              | 612              | V   | E8232a | propan-2-yl pentanoate                | 18362-97-5  | 1.0          | 293.15     | 857.90                                       | <sup>120</sup> | -                                                  | -              | -            | -              | 436.35       | <sup>121</sup> | 606.49       | <sup>121</sup> | (4.48)     | -              |
| 745              | 613              | V   | E8233a | 2-ethylbutyl acetate                  | 10031-87-5  | 1.0          | 293.15     | 879.00                                       | <sup>120</sup> | -                                                  | -              | -            | -              | 435.65       | <sup>121</sup> | 606.49       | <sup>121</sup> | (4.48)     | -              |
| 746              | 613              | V   | E8233b | 2-ethylbutyl acetate                  | 10031-87-5  | 0.01         | 327.67     | -                                            | -              | 44.88                                              | <sup>121</sup> | -            | -              | 435.65       | <sup>121</sup> | 606.49       | <sup>121</sup> | (4.48)     | -              |
| 747              | 614              | V   | E8235a | 2-methylpentyl acetate                | 7789-99-3   | 1.0          | 298.15     | 869.10                                       | <sup>116</sup> | -                                                  | -              | -            | -              | 436.15       | <sup>120</sup> | 606.49       | <sup>121</sup> | (4.48)     | -              |
| 748              | 614              | V   | E8235b | 2-methylpentyl acetate                | 7789-99-3   | 0.01         | 328.07     | -                                            | -              | 45.70                                              | <sup>121</sup> | -            | -              | 436.15       | <sup>120</sup> | 606.49       | <sup>121</sup> | (4.48)     | -              |
| 749              | 615              | V   | E8236a | hexan-2-yl acetate                    | 5953-49-1   | 1.0          | 298.15     | 859.91                                       | <sup>116</sup> | -                                                  | -              | -            | -              | -            | -              | 606.49       | <sup>121</sup> | (4.48)     | -              |
| 750              | 616              | V   | E8237a | methyl heptanoate                     | 106-73-0    | 1.01         | 298.15     | 875.88                                       | <sup>118</sup> | 51.60                                              | <sup>114</sup> | 217.45       | <sup>120</sup> | 447.15       | <sup>121</sup> | 606.49       | <sup>121</sup> | 4.355      | <sup>120</sup> |
| 751              | 617              | V   | E8238a | ethyl hexanoate                       | 123-66-0    | 1.0          | 298.15     | 866.69                                       | <sup>116</sup> | 50.60                                              | <sup>114</sup> | 205.55       | <sup>120</sup> | 440.15       | <sup>121</sup> | 606.49       | <sup>121</sup> | 4.45       | <sup>120</sup> |
| 752              | 618              | V   | E8239a | propyl pentanoate                     | 141-06-0    | 1.0          | 298.15     | 865.78                                       | <sup>116</sup> | -                                                  | -              | 202.45       | <sup>120</sup> | 440.65       | <sup>121</sup> | 606.49       | <sup>121</sup> | 4.0        | <sup>120</sup> |
| 753              | 618              | V   | E8239b | propyl pentanoate                     | 141-06-0    | 0.01         | 329.57     | -                                            | -              | 46.64                                              | <sup>121</sup> | 202.45       | <sup>120</sup> | 440.65       | <sup>121</sup> | 606.49       | <sup>121</sup> | 4.0        | <sup>120</sup> |
| 754              | 619              | V   | E8240a | butyl butanoate                       | 109-21-7    | 1.01         | 298.15     | 869.14                                       | <sup>118</sup> | -                                                  | -              | 181.65       | <sup>120</sup> | 438.15       | <sup>121</sup> | 606.49       | <sup>121</sup> | 4.39       | <sup>120</sup> |
| 755              | 619              | V   | E8240b | butyl butanoate                       | 109-21-7    | 0.01         | 327.57     | -                                            | -              | 46.39                                              | <sup>121</sup> | 181.65       | <sup>120</sup> | 438.15       | <sup>121</sup> | 606.49       | <sup>121</sup> | 4.39       | <sup>120</sup> |
| 756              | 620              | V   | E8241a | pentyl propanoate                     | 624-54-4    | 1.0          | 298.15     | 868.10                                       | <sup>116</sup> | 52.20                                              | <sup>114</sup> | 200.05       | <sup>120</sup> | 441.90       | <sup>121</sup> | 606.49       | <sup>121</sup> | 4.552      | <sup>120</sup> |
| 757              | 621              | V   | E8242a | hexyl acetate                         | 142-92-7    | 1.0          | 298.15     | 868.60                                       | <sup>116</sup> | 51.90                                              | <sup>114</sup> | 212.15       | <sup>120</sup> | 444.65       | <sup>121</sup> | 606.49       | <sup>121</sup> | 4.42       | <sup>120</sup> |
| 758              | 622              | V   | E9201a | methyl 2,4,4-trimethylpentanoate      | -           | 1.0          | 298.0      | -                                            | -              | 48.40                                              | <sup>114</sup> | -            | -              | -            | -              | -            | -              | (4.04)     | -              |
| 759              | 623              | V   | E9202a | 2-methylbutan-2-yl 2-methylpropanoate | 194784-93-5 | 1.0          | 298.0      | -                                            | -              | 47.80                                              | <sup>114</sup> | -            | -              | -            | -              | -            | -              | (4.04)     | -              |
| 760              | 624              | V   | E9203a | butyl 2,2-dimethylpropanoate          | 5129-37-3   | 1.0          | 298.0      | -                                            | -              | 50.40                                              | <sup>114</sup> | -            | -              | -            | -              | -            | -              | (4.04)     | -              |
| 761              | 625              | V   | E9205b | 2-methylbutan-2-yl butanoate          | 2050-00-2   | 1.0          | 298.0      | -                                            | -              | 50.30                                              | <sup>114</sup> | -            | -              | 460.31       | <sup>121</sup> | 625.31       | <sup>121</sup> | (4.04)     | -              |
| 762              | 626              | V   | E9207a | ethyl 2,4-dimethylpentanoate          | 172103-12-7 | 1.0          | 301.15     | 855.00                                       | <sup>116</sup> | -                                                  | -              | -            | -              | -            | -              | -            | -              | (4.04)     | -              |
| 763              | 627              | V   | E9209a | 3-methylbutyl 2-methylpropanoate      | 2050-01-3   | 1.0          | 293.15     | 862.70                                       | <sup>120</sup> | 51.70                                              | <sup>114</sup> | -            | -              | 442.15       | <sup>120</sup> | -            | -              | (4.04)     | -              |
| 764              | 628              | V   | E9210a | ethyl 3,4-dimethylpentanoate          | 6570-83-8   | 1.0          | 298.15     | 869.00                                       | <sup>116</sup> | -                                                  | -              | -            | -              | -            | -              | -            | -              | (4.04)     | -              |
| 765              | 629              | V   | E9212a | 2-methylpropyl 3-methylbutanoate      | 589-59-3    | 1.0          | 298.15     | 861.70                                       | <sup>116</sup> | -                                                  | -              | -            | -              | 442.15       | <sup>120</sup> | -            | -              | (4.04)     | -              |

Table S.1 – Reference experimental data (continued)

| $n_{\text{sim}}$ | $n_{\text{iso}}$ | Set | Code   | Name                                      | CAS        | $P$<br>[bar] | $T$<br>[K] | $\rho_{\text{liq}}$<br>[kg·m <sup>-3</sup> ] | Src | $\Delta H_{\text{vap}}$<br>[kJ·mol <sup>-1</sup> ] | Src | $T_m$<br>[K] | Src | $T_b$<br>[K] | Src | $T_c$<br>[K] | Src | $\epsilon$ | Src |
|------------------|------------------|-----|--------|-------------------------------------------|------------|--------------|------------|----------------------------------------------|-----|----------------------------------------------------|-----|--------------|-----|--------------|-----|--------------|-----|------------|-----|
| 766              | 629              | V   | E9212b | 2-methylpropyl 3-methylbutanoate          | 589-59-3   | 1.0          | 304.0      | -                                            | -   | 47.30                                              | 114 | -            | -   | 442.15       | 120 | -            | -   | (4.04)     | -   |
| 767              | 630              | V   | E9213a | butan-2-yl 3-methylbutanoate              | 2051-38-9  | 1.0          | 293.15     | 848.20                                       | 116 | -                                                  | -   | -            | -   | -            | -   | -            | -   | (4.04)     | -   |
| 768              | 631              | V   | E9214a | methyl 2-propylpentanoate                 | 22632-59-3 | 1.0          | 293.15     | 871.00                                       | 116 | -                                                  | -   | -            | -   | -            | -   | -            | -   | (4.04)     | -   |
| 769              | 632              | V   | E9215a | ethyl 2-ethylpentanoate                   | 43164-26-7 | 1.0          | 293.15     | 857.20                                       | 116 | -                                                  | -   | -            | -   | -            | -   | -            | -   | (4.04)     | -   |
| 770              | 633              | V   | E9216a | propyl 2-ethylbutanoate                   | 5129-46-4  | 1.0          | 293.15     | 868.80                                       | 116 | -                                                  | -   | -            | -   | -            | -   | -            | -   | (4.04)     | -   |
| 771              | 634              | V   | E9217a | propyl 2-methylpentanoate                 | 6639-14-1  | 1.0          | 293.15     | 866.90                                       | 116 | -                                                  | -   | -            | -   | -            | -   | -            | -   | (4.04)     | -   |
| 772              | 635              | V   | E9218a | butyl 2-methylbutanoate                   | 15706-73-7 | 1.0          | 293.15     | 862.00                                       | 120 | 50.60                                              | 114 | -            | -   | 452.15       | 121 | -            | -   | (4.04)     | -   |
| 773              | 636              | V   | E9219a | pentyl 2-methylpropanoate                 | 2445-72-9  | 1.0          | 293.15     | 872.10                                       | 116 | -                                                  | -   | -            | -   | -            | -   | 625.31       | 121 | (4.04)     | -   |
| 774              | 637              | V   | E9220a | ethyl 3-methylhexanoate                   | 41692-47-1 | 1.0          | 293.15     | 867.90                                       | 116 | -                                                  | -   | -            | -   | 450.15       | 121 | 625.31       | 121 | (4.04)     | -   |
| 775              | 638              | V   | E9221a | butyl 3-methylbutanoate                   | 109-19-3   | 1.0          | 298.15     | 856.69                                       | 116 | -                                                  | -   | -            | -   | 456.91       | 121 | -            | -   | (4.04)     | -   |
| 776              | 638              | V   | E9221b | butyl 3-methylbutanoate                   | 109-19-3   | 1.0          | 456.91     | -                                            | -   | 39.76                                              | 121 | -            | -   | 456.91       | 121 | -            | -   | (4.04)     | -   |
| 777              | 639              | V   | E9222a | ethyl 4-methylhexanoate                   | 1561-10-0  | 1.0          | 293.15     | 870.80                                       | 120 | -                                                  | -   | -            | -   | 453.15       | 121 | 625.31       | 121 | (4.04)     | -   |
| 778              | 640              | V   | E9223a | 2-methylbutyl butanoate                   | 51115-64-1 | 0.01         | 336.57     | -                                            | -   | 49.17                                              | 121 | -            | -   | 452.15       | 121 | 620.00       | 121 | (4.04)     | -   |
| 779              | 641              | V   | E9225a | 3-methylbutyl butanoate                   | 106-27-4   | 1.0          | 298.15     | 860.30                                       | 116 | -                                                  | -   | -            | -   | 452.15       | 121 | 625.31       | 121 | 4.0        | 120 |
| 780              | 641              | V   | E9225b | 3-methylbutyl butanoate                   | 106-27-4   | 1.0          | 309.0      | -                                            | -   | 47.40                                              | 114 | -            | -   | 452.15       | 121 | 625.31       | 121 | 4.0        | 120 |
| 781              | 642              | V   | E9226a | 2-methylpropyl pentanoate                 | 10588-10-0 | 1.0          | 298.15     | 853.57                                       | 116 | -                                                  | -   | -            | -   | 456.15       | 120 | 625.31       | 121 | 3.8        | 120 |
| 782              | 642              | V   | E9226b | 2-methylpropyl pentanoate                 | 10588-10-0 | 0.01         | 338.77     | -                                            | -   | 48.78                                              | 121 | -            | -   | 456.15       | 120 | 625.31       | 121 | 3.8        | 120 |
| 783              | 643              | V   | E9227a | pentan-2-yl butanoate                     | 60415-61-4 | 1.0          | 298.15     | 864.72                                       | 116 | -                                                  | -   | -            | -   | 455.15       | 121 | 625.31       | 121 | (4.04)     | -   |
| 784              | 644              | V   | E9228a | butan-2-yl pentanoate                     | 23361-74-2 | 1.0          | 298.15     | 854.87                                       | 116 | -                                                  | -   | -            | -   | -            | -   | -            | -   | (4.04)     | -   |
| 785              | 645              | V   | E9229a | propan-2-yl hexanoate                     | 2311-46-8  | 1.0          | 298.15     | 852.50                                       | 116 | -                                                  | -   | -            | -   | -            | -   | -            | -   | (4.04)     | -   |
| 786              | 645              | V   | E9229b | propan-2-yl hexanoate                     | 2311-46-8  | 1.0          | 322.0      | -                                            | -   | 51.60                                              | 114 | -            | -   | -            | -   | -            | -   | (4.04)     | -   |
| 787              | 646              | V   | E9232a | heptan-3-yl acetate                       | 5921-83-5  | 0.01         | 346.57     | 818.20                                       | 121 | -                                                  | -   | -            | -   | -            | -   | 625.31       | 121 | (4.04)     | -   |
| 788              | 647              | V   | E9234a | heptan-2-yl acetate                       | 5921-82-4  | 1.0          | 298.15     | 857.03                                       | 116 | -                                                  | -   | -            | -   | -            | -   | 625.31       | 121 | (4.04)     | -   |
| 789              | 648              | V   | E9235a | methyl octanoate                          | 111-11-5   | 1.0          | 298.15     | 873.12                                       | 116 | 56.40                                              | 114 | 236.25       | 120 | 466.05       | 121 | 625.31       | 121 | 4.101      | 120 |
| 790              | 649              | V   | E9236a | ethyl heptanoate                          | 106-30-9   | 1.0          | 298.15     | 864.71                                       | 116 | -                                                  | -   | 206.95       | 120 | 460.15       | 121 | 625.31       | 121 | (4.04)     | -   |
| 791              | 650              | V   | E9237a | propyl hexanoate                          | 626-77-7   | 1.0          | 298.15     | 863.02                                       | 116 | -                                                  | -   | 199.15       | 120 | 460.15       | 121 | 625.31       | 121 | (4.04)     | -   |
| 792              | 650              | V   | E9237b | propyl hexanoate                          | 626-77-7   | 1.0          | 330.0      | -                                            | -   | 52.10                                              | 114 | 199.15       | 120 | 460.15       | 121 | 625.31       | 121 | (4.04)     | -   |
| 793              | 651              | V   | E9238a | butyl pentanoate                          | 591-68-4   | 1.0          | 298.15     | 863.37                                       | 116 | -                                                  | -   | 189.38       | 120 | 459.15       | 120 | 625.31       | 121 | (4.04)     | -   |
| 794              | 651              | V   | E9238b | butyl pentanoate                          | 591-68-4   | 0.01         | 344.77     | -                                            | -   | 49.19                                              | 121 | 189.38       | 120 | 459.15       | 120 | 625.31       | 121 | (4.04)     | -   |
| 795              | 652              | V   | E9239a | pentyl butanoate                          | 540-18-1   | 1.0          | 298.15     | 861.89                                       | 116 | 53.60                                              | 114 | 200.49       | 120 | 458.15       | 121 | 625.31       | 121 | 4.08       | 120 |
| 796              | 653              | V   | E9240a | hexyl propanoate                          | 2445-76-3  | 1.0          | 298.15     | 865.42                                       | 116 | 57.10                                              | 114 | 215.65       | 120 | 463.15       | 121 | 625.31       | 121 | (4.04)     | -   |
| 797              | 654              | V   | E9241a | heptyl acetate                            | 112-06-1   | 1.0          | 298.15     | 866.43                                       | 116 | 56.90                                              | 114 | 222.85       | 120 | 465.55       | 121 | 625.31       | 121 | 4.2        | 120 |
| 798              | 655              | V   | E0201a | 2,2-dimethylpropyl 2,2-dimethylpropanoate | 5340-26-1  | 1.0          | 293.15     | 843.10                                       | 116 | 48.90                                              | 114 | -            | -   | -            | -   | -            | -   | (4.04)     | -   |
| 799              | 656              | V   | E0202a | 2-methylbutan-2-yl 2,2-dimethylpropanoate | 89397-96-6 | 1.0          | 298.0      | -                                            | -   | 48.00                                              | 114 | -            | -   | -            | -   | -            | -   | (4.04)     | -   |
| 800              | 657              | V   | E0203a | 2-methylbutan-2-yl 3-methylbutanoate      | 542-37-0   | 1.0          | 273.15     | 872.90                                       | 120 | -                                                  | -   | -            | -   | 461.15       | 120 | -            | -   | (4.04)     | -   |
| 801              | 658              | V   | E0204a | ethyl 2,2-diethylbutanoate                | 34666-17-6 | 1.0          | 289.15     | 883.70                                       | 116 | -                                                  | -   | -            | -   | -            | -   | -            | -   | (4.04)     | -   |
| 802              | 659              | V   | E0205a | butyl 3,3-dimethylbutanoate               | 85204-26-8 | 1.0          | 293.15     | 856.80                                       | 116 | -                                                  | -   | -            | -   | -            | -   | -            | -   | (4.04)     | -   |
| 803              | 660              | V   | E0209a | 3-methylbutyl 3-methylbutanoate           | 659-70-1   | 1.0          | 298.15     | 854.10                                       | 116 | -                                                  | -   | -            | -   | 463.15       | 120 | -            | -   | 4.39       | 120 |
| 804              | 660              | V   | E0209b | 3-methylbutyl 3-methylbutanoate           | 659-70-1   | 1.0          | 315.0      | -                                            | -   | 47.20                                              | 114 | -            | -   | 463.15       | 120 | -            | -   | 4.39       | 120 |
| 805              | 661              | V   | E0210a | 2-methylpropyl 4-methylpentanoate         | 25415-70-7 | 0.01         | 333.17     | 819.40                                       | 121 | -                                                  | -   | -            | -   | 445.15       | 121 | 643.00       | 121 | (4.04)     | -   |
| 806              | 662              | V   | E0212a | 6-methylheptan-3-yl acetate               | 32764-34-4 | 0.01         | 345.27     | 810.29                                       | 121 | -                                                  | -   | -            | -   | 457.65       | 121 | 643.00       | 121 | (4.04)     | -   |
| 807              | 663              | V   | E0213a | 6-methylheptan-2-yl acetate               | 67952-57-2 | 1.0          | 293.15     | 847.40                                       | 120 | -                                                  | -   | -            | -   | 460.15       | 120 | -            | -   | (4.04)     | -   |
| 808              | 664              | V   | E0214a | ethyl 2-propylpentanoate                  | 17022-31-0 | 1.0          | 293.15     | 865.90                                       | 116 | -                                                  | -   | -            | -   | -            | -   | -            | -   | (4.04)     | -   |
| 809              | 665              | V   | E0215a | methyl 2-ethylheptanoate                  | 816-63-7   | 1.0          | 298.15     | 864.40                                       | 116 | -                                                  | -   | -            | -   | -            | -   | -            | -   | (4.04)     | -   |
| 810              | 666              | V   | E0216a | ethyl 2-ethylhexanoate                    | 2983-37-1  | 1.0          | 298.15     | 858.60                                       | 120 | -                                                  | -   | -            | -   | 473.73       | 121 | 643.00       | 121 | (4.04)     | -   |
| 811              | 667              | V   | E0217a | methyl 2-methyloctanoate                  | 2177-86-8  | 1.0          | 277.15     | 875.90                                       | 116 | -                                                  | -   | -            | -   | -            | -   | -            | -   | (4.04)     | -   |
| 812              | 668              | V   | E0218a | hexyl 2-methylpropanoate                  | 2349-07-7  | 1.0          | 293.15     | 870.00                                       | 116 | -                                                  | -   | -            | -   | -            | -   | -            | -   | (4.04)     | -   |
| 813              | 669              | V   | E0219a | 2-ethylbutyl butanoate                    | 74398-53-1 | 1.0          | 292.95     | 872.60                                       | 116 | -                                                  | -   | -            | -   | -            | -   | 643.00       | 121 | (4.04)     | -   |



Table S.1 – Reference experimental data (continued)

| $n_{\text{sim}}$ | $n_{\text{iso}}$ | Set | Code   | Name                               | CAS         | $P$<br>[bar] | $T$<br>[K] | $\rho_{\text{liq}}$<br>[kg·m <sup>-3</sup> ] | Src | $\Delta H_{\text{vap}}$<br>[kJ·mol <sup>-1</sup> ] | Src | $T_m$<br>[K] | Src | $T_b$<br>[K] | Src | $T_c$<br>[K] | Src | $\epsilon$ | Src |
|------------------|------------------|-----|--------|------------------------------------|-------------|--------------|------------|----------------------------------------------|-----|----------------------------------------------------|-----|--------------|-----|--------------|-----|--------------|-----|------------|-----|
| 814              | 670              | V   | E0220a | 3-methylpentyl butanoate           | 84254-83-1  | 0.01         | 354.97     | 826.08                                       | 121 | 51.33                                              | 121 | -            | -   | -            | -   | 643.00       | 121 | (4.04)     | -   |
| 815              | 671              | V   | E0222a | 3-methylbutyl pentanoate           | 2050-09-1   | 1.0          | 293.15     | 858.00                                       | 116 | -                                                  | -   | -            | -   | 466.15       | 120 | 643.00       | 121 | 3.6        | 120 |
| 816              | 672              | V   | E0223a | 2-methylpropyl hexanoate           | 105-79-3    | 0.01         | 318.69     | -                                            | -   | 53.05                                              | 121 | -            | -   | 427.05       | 121 | 643.00       | 121 | (4.04)     | -   |
| 817              | 673              | V   | E0224a | butan-2-yl hexanoate               | 820-00-8    | 1.0          | 298.15     | 857.49                                       | 116 | -                                                  | -   | -            | -   | -            | -   | -            | -   | (4.04)     | -   |
| 818              | 674              | V   | E0225a | 2-ethylhexyl acetate               | 103-09-3    | 1.0          | 298.15     | 868.80                                       | 116 | -                                                  | -   | 193.15       | 120 | 471.75       | 121 | 642.40       | 121 | (4.04)     | -   |
| 819              | 674              | V   | E0225b | 2-ethylhexyl acetate               | 103-09-3    | 1.0          | 348.0      | -                                            | -   | 50.10                                              | 114 | 193.15       | 120 | 471.75       | 121 | 642.40       | 121 | (4.04)     | -   |
| 820              | 675              | V   | E0227a | 2-methylheptyl acetate             | -           | 0.01         | 353.67     | 805.44                                       | 121 | -                                                  | -   | -            | -   | -            | -   | 643.00       | 121 | (4.04)     | -   |
| 821              | 676              | V   | E0228a | octan-3-yl acetate                 | 4864-61-3   | 0.01         | 348.17     | 814.17                                       | 121 | -                                                  | -   | -            | -   | -            | -   | 643.00       | 121 | (4.04)     | -   |
| 822              | 677              | V   | E0230a | octan-2-yl acetate                 | 2051-50-5   | 1.0          | 298.15     | 858.09                                       | 116 | -                                                  | -   | -            | -   | -            | -   | 643.00       | 121 | (4.04)     | -   |
| 823              | 678              | V   | E0231a | methyl nonanoate                   | 1731-84-6   | 1.0          | 298.15     | 870.87                                       | 116 | 61.60                                              | 114 | -            | -   | 486.65       | 121 | 643.00       | 121 | 3.943      | 120 |
| 824              | 679              | V   | E0232a | ethyl octanoate                    | 106-32-1    | 1.0          | 298.15     | 862.92                                       | 116 | 59.50                                              | 114 | 228.45       | 120 | 481.65       | 121 | 643.00       | 121 | (4.04)     | -   |
| 825              | 680              | V   | E0233a | propyl heptanoate                  | 7778-87-2   | 1.0          | 298.15     | 861.59                                       | 116 | -                                                  | -   | -            | -   | 481.15       | 121 | 643.00       | 121 | (4.04)     | -   |
| 826              | 680              | V   | E0233b | propyl heptanoate                  | 7778-87-2   | 0.01         | 361.97     | -                                            | -   | 52.12                                              | 121 | -            | -   | 481.15       | 121 | 643.00       | 121 | (4.04)     | -   |
| 827              | 681              | V   | E0234a | butyl hexanoate                    | 626-82-4    | 1.0          | 298.15     | 862.30                                       | 116 | -                                                  | -   | 223.15       | 120 | 481.15       | 121 | 643.00       | 121 | (4.04)     | -   |
| 828              | 681              | V   | E0234b | butyl hexanoate                    | 626-82-4    | 0.01         | 361.97     | -                                            | -   | 52.07                                              | 121 | 223.15       | 120 | 481.15       | 121 | 643.00       | 121 | (4.04)     | -   |
| 829              | 682              | V   | E0235a | pentyl pentanoate                  | 2173-56-0   | 1.0          | 298.15     | 860.20                                       | 116 | -                                                  | -   | 194.35       | 120 | 476.85       | 121 | 643.00       | 121 | 4.076      | 120 |
| 830              | 682              | V   | E0235b | pentyl pentanoate                  | 2173-56-0   | 0.01         | 358.53     | -                                            | -   | 51.86                                              | 121 | 194.35       | 120 | 476.85       | 121 | 643.00       | 121 | 4.076      | 120 |
| 831              | 683              | V   | E0236a | hexyl butanoate                    | 2639-63-6   | 1.01         | 298.15     | 851.00                                       | 118 | -                                                  | -   | 195.15       | 120 | 479.15       | 121 | 643.00       | 121 | (4.04)     | -   |
| 832              | 683              | V   | E0236b | hexyl butanoate                    | 2639-63-6   | 0.01         | 361.97     | -                                            | -   | 51.44                                              | 121 | 195.15       | 120 | 479.15       | 121 | 643.00       | 121 | (4.04)     | -   |
| 833              | 684              | V   | E0237a | heptyl propanoate                  | 2216-81-1   | 1.0          | 298.15     | 863.97                                       | 116 | -                                                  | -   | -            | -   | 483.15       | 121 | 643.00       | 121 | (4.04)     | -   |
| 834              | 684              | V   | E0237b | heptyl propanoate                  | 2216-81-1   | 0.01         | 364.47     | -                                            | -   | 52.45                                              | 121 | -            | -   | 483.15       | 121 | 643.00       | 121 | (4.04)     | -   |
| 835              | 685              | V   | E0238a | octyl acetate                      | 112-14-1    | 1.0          | 298.15     | 864.30                                       | 116 | 60.70                                              | 114 | 235.15       | 120 | 484.45       | 121 | 643.00       | 121 | 4.18       | 120 |
| 836              | 686              | V   | E7401a | dimethyl 2,2-dimethylpropanedioate | 6065-54-9   | 1.0          | 293.0      | -                                            | -   | 55.60                                              | 114 | -            | -   | -            | -   | -            | -   | (7.71)     | -   |
| 837              | 687              | V   | E7403a | dimethyl 2-ethylpropanedioate      | 26717-67-9  | 1.0          | 298.15     | 1061.39                                      | 116 | -                                                  | -   | -            | -   | -            | -   | -            | -   | (7.71)     | -   |
| 838              | 688              | V   | E7404a | dimethyl 2-methylbutanedioate      | 1604-11-1   | 1.0          | 298.15     | 1076.00                                      | 120 | -                                                  | -   | -            | -   | 469.15       | 121 | -            | -   | (7.71)     | -   |
| 839              | 688              | V   | E7404b | dimethyl 2-methylbutanedioate      | 1604-11-1   | 1.0          | 469.15     | -                                            | -   | 40.93                                              | 121 | -            | -   | 469.15       | 121 | -            | -   | (7.71)     | -   |
| 840              | 689              | V   | E7405a | ethyl 2-acetyloxypropanoate        | 2985-28-6   | 1.0          | 328.0      | -                                            | -   | 57.90                                              | 114 | -            | -   | -            | -   | -            | -   | (7.71)     | -   |
| 841              | 690              | V   | E7406a | 2-acetyloxypropyl acetate          | 623-84-7    | 1.0          | 293.15     | 1059.00                                      | 120 | -                                                  | -   | -            | -   | 463.65       | 121 | -            | -   | (7.71)     | -   |
| 842              | 690              | V   | E7406b | 2-acetyloxypropyl acetate          | 623-84-7    | 1.0          | 323.0      | -                                            | -   | 54.90                                              | 114 | -            | -   | 463.65       | 121 | -            | -   | (7.71)     | -   |
| 843              | 691              | V   | E7407a | diethyl propanedioate              | 105-53-3    | 1.0          | 298.15     | 1049.80                                      | 116 | 58.70                                              | 114 | 223.15       | 120 | 472.05       | 121 | 653.00       | 121 | 7.550      | 120 |
| 844              | 692              | V   | E7408a | 4-O-ethyl 1-O-methyl butanedioate  | 627-73-6    | 1.0          | 293.15     | 1076.00                                      | 116 | -                                                  | -   | -            | -   | 481.35       | 121 | -            | -   | (7.71)     | -   |
| 845              | 692              | V   | E7408b | 4-O-ethyl 1-O-methyl butanedioate  | 627-73-6    | 1.0          | 481.35     | -                                            | -   | 42.09                                              | 121 | -            | -   | 481.35       | 121 | -            | -   | (7.71)     | -   |
| 846              | 693              | V   | E7409a | dimethyl pentanedioate             | 1119-40-0   | 1.01         | 293.15     | 1087.67                                      | 118 | 65.70                                              | 114 | 230.65       | 120 | 487.15       | 121 | -            | -   | 7.87       | 120 |
| 847              | 694              | V   | E7411a | ethyl 3-acetyloxypropanoate        | 40326-37-2  | 1.0          | 358.0      | -                                            | -   | 72.10                                              | 114 | -            | -   | -            | -   | -            | -   | (7.71)     | -   |
| 848              | 695              | V   | E7412a | 3-acetyloxypropyl acetate          | 628-66-0    | 1.0          | 293.15     | 1054.70                                      | 116 | -                                                  | -   | -            | -   | 482.65       | 121 | -            | -   | (7.71)     | -   |
| 849              | 695              | V   | E7412b | 3-acetyloxypropyl acetate          | 628-66-0    | 1.0          | 482.65     | -                                            | -   | 42.22                                              | 121 | -            | -   | 482.65       | 121 | -            | -   | (7.71)     | -   |
| 850              | 696              | V   | E8402a | dipropan-2-yl oxalate              | 615-81-6    | 1.0          | 298.15     | 989.19                                       | 116 | 60.20                                              | 114 | -            | -   | 463.15       | 121 | -            | -   | 6.403      | 120 |
| 851              | 697              | V   | E8403a | dimethyl 2-propylpropanedioate     | 14035-96-2  | 1.0          | 298.15     | 1036.93                                      | 116 | -                                                  | -   | -            | -   | -            | -   | -            | -   | (6.45)     | -   |
| 852              | 698              | V   | E8404a | diethyl 2-methylpropanedioate      | 609-08-5    | 1.0          | 298.15     | 1017.38                                      | 116 | -                                                  | -   | -            | -   | 474.15       | 121 | -            | -   | (6.45)     | -   |
| 853              | 698              | V   | E8404b | diethyl 2-methylpropanedioate      | 609-08-5    | 1.0          | 327.0      | -                                            | -   | 52.50                                              | 114 | -            | -   | 474.15       | 121 | -            | -   | (6.45)     | -   |
| 854              | 699              | V   | E8407a | dipropyl oxalate                   | 615-98-5    | 1.0          | 298.15     | 1013.98                                      | 116 | -                                                  | -   | 228.85       | 120 | 484.15       | 121 | -            | -   | (6.45)     | -   |
| 855              | 699              | V   | E8407b | dipropyl oxalate                   | 615-98-5    | 1.0          | 341.0      | -                                            | -   | 57.80                                              | 114 | 228.85       | 120 | 484.15       | 121 | -            | -   | (6.45)     | -   |
| 856              | 700              | V   | E8408a | diethyl butanedioate               | 123-25-1    | 1.0          | 298.15     | 1035.30                                      | 116 | 64.50                                              | 114 | 251.55       | 120 | 489.65       | 121 | 663.00       | 121 | 6.098      | 120 |
| 857              | 701              | V   | E8409a | dimethyl hexanedioate              | 627-93-0    | 1.0          | 298.15     | 1057.57                                      | 116 | 69.00                                              | 114 | 283.45       | 120 | 495.09       | 121 | -            | -   | 6.84       | 120 |
| 858              | 702              | V   | E8410a | 2-propanoyloxyethyl propanoate     | 123-80-8    | 1.0          | 293.15     | 1042.00                                      | 116 | 67.60                                              | 114 | -            | -   | 484.15       | 121 | -            | -   | (6.45)     | -   |
| 859              | 703              | V   | E8411a | propyl 3-acetyloxypropanoate       | 200867-13-6 | 1.0          | 367.0      | -                                            | -   | 74.70                                              | 114 | -            | -   | -            | -   | -            | -   | (6.45)     | -   |
| 860              | 704              | V   | E8412a | 4-acetyloxybutyl acetate           | 628-67-1    | 1.0          | 293.15     | 1046.00                                      | 116 | -                                                  | -   | 285.15       | 120 | 502.15       | 121 | -            | -   | (6.45)     | -   |
| 861              | 704              | V   | E8412b | 4-acetyloxybutyl acetate           | 628-67-1    | 1.0          | 502.15     | -                                            | -   | 44.09                                              | 121 | 285.15       | 120 | 502.15       | 121 | -            | -   | (6.45)     | -   |

Table S.1 – Reference experimental data (continued)

| $n_{sim}$ | $n_{iso}$ | Set | Code   | Name                                  | CAS        | $P$   | $T$    | $\rho_{liq}$                      | Src            | $\Delta H_{vap}$                    | Src            | $T_m$  | Src            | $T_b$  | Src            | $T_c$  | Src            | $\epsilon$ | Src            |
|-----------|-----------|-----|--------|---------------------------------------|------------|-------|--------|-----------------------------------|----------------|-------------------------------------|----------------|--------|----------------|--------|----------------|--------|----------------|------------|----------------|
|           |           |     |        |                                       |            | [bar] | [K]    | [ $\text{kg}\cdot\text{m}^{-3}$ ] |                | [ $\text{kJ}\cdot\text{mol}^{-1}$ ] |                | [K]    |                | [K]    |                |        |                |            |                |
| 862       | 705       | V   | E9402a | diethyl 2,2-dimethylpropanedioate     | 1619-62-1  | 1.0   | 470.15 | -                                 | -              | 41.02                               | <sup>121</sup> | -      | -              | 470.15 | <sup>121</sup> | -      | -              | (6.66)     | -              |
| 863       | 706       | V   | E9406a | dipropyl 2-ethylpropanedioate         | 13195-64-7 | 1.0   | 298.0  | -                                 | -              | 63.90                               | <sup>114</sup> | -      | -              | 509.23 | <sup>121</sup> | -      | -              | (6.66)     | -              |
| 864       | 707       | V   | E9407a | diethyl 2-ethylpropanedioate          | 133-13-1   | 1.0   | 298.15 | 1000.71                           | <sup>116</sup> | -                                   | -              | -      | -              | 481.15 | <sup>121</sup> | -      | -              | (6.66)     | -              |
| 865       | 707       | V   | E9407b | diethyl 2-ethylpropanedioate          | 133-13-1   | 1.0   | 338.0  | -                                 | -              | 55.30                               | <sup>114</sup> | -      | -              | 481.15 | <sup>121</sup> | -      | -              | (6.66)     | -              |
| 866       | 708       | V   | E9408a | diethyl 2-methylbutanedioate          | 4676-51-1  | 1.0   | 490.65 | -                                 | -              | 42.99                               | <sup>121</sup> | -      | -              | 490.65 | <sup>121</sup> | -      | -              | (6.66)     | -              |
| 867       | 709       | V   | E9409a | butyl 2-acetyloxypropanoate           | 5422-69-5  | 1.0   | 340.0  | -                                 | -              | 63.20                               | <sup>114</sup> | -      | -              | -      | -              | -      | -              | (6.66)     | -              |
| 868       | 710       | V   | E9410a | dipropyl propanedioate                | 1117-19-7  | 1.0   | 298.0  | -                                 | -              | 66.20                               | <sup>114</sup> | -      | -              | 502.15 | <sup>121</sup> | -      | -              | (6.66)     | -              |
| 869       | 711       | V   | E9411a | diethyl pentanedioate                 | 818-38-2   | 1.0   | 293.15 | 1022.00                           | <sup>120</sup> | 67.00                               | <sup>114</sup> | 249.05 | <sup>120</sup> | 509.65 | <sup>121</sup> | -      | -              | 6.659      | <sup>120</sup> |
| 870       | 712       | V   | E9412a | dimethyl heptanedioate                | 1732-08-7  | 1.0   | 293.15 | 1039.10                           | <sup>116</sup> | 73.50                               | <sup>114</sup> | 252.15 | <sup>120</sup> | 509.23 | <sup>121</sup> | -      | -              | (6.66)     | -              |
| 871       | 713       | V   | E9413a | butyl 3-acetyloxypropanoate           | 40326-38-3 | 1.0   | 382.0  | -                                 | -              | 75.40                               | <sup>114</sup> | -      | -              | -      | -              | -      | -              | (6.66)     | -              |
| 872       | 714       | V   | E9414a | 5-acetyloxypropyl acetate             | 6963-44-6  | 1.0   | 293.15 | 1029.60                           | <sup>120</sup> | -                                   | -              | 275.15 | <sup>120</sup> | 514.15 | <sup>121</sup> | -      | -              | (6.66)     | -              |
| 873       | 714       | V   | E9414b | 5-acetyloxypropyl acetate             | 6963-44-6  | 1.0   | 514.15 | -                                 | -              | 45.24                               | <sup>121</sup> | 275.15 | <sup>120</sup> | 514.15 | <sup>121</sup> | -      | -              | (6.66)     | -              |
| 874       | 715       | V   | E0401a | ditert-butyl oxalate                  | 691-64-5   | 1.0   | 298.0  | -                                 | -              | 63.50                               | <sup>114</sup> | -      | -              | -      | -              | -      | -              | (6.11)     | -              |
| 875       | 716       | V   | E0403a | diethyl 2-ethyl-2-methylpropanedioate | 2049-70-9  | 1.0   | 332.0  | -                                 | -              | 53.20                               | <sup>114</sup> | -      | -              | -      | -              | -      | -              | (6.11)     | -              |
| 876       | 717       | V   | E0404a | bis(2-methylpropyl) oxalate           | 2050-61-5  | 1.0   | 351.0  | -                                 | -              | 55.50                               | <sup>114</sup> | -      | -              | 502.15 | <sup>121</sup> | -      | -              | (6.11)     | -              |
| 877       | 718       | V   | E0405a | diethyl 2-propan-2-ylpropanedioate    | 759-36-4   | 1.0   | 293.15 | 996.10                            | <sup>120</sup> | -                                   | -              | -      | -              | 488.15 | <sup>121</sup> | -      | -              | (6.11)     | -              |
| 878       | 718       | V   | E0405b | diethyl 2-propan-2-ylpropanedioate    | 759-36-4   | 1.0   | 488.15 | -                                 | -              | 42.75                               | <sup>121</sup> | -      | -              | 488.15 | <sup>121</sup> | -      | -              | (6.11)     | -              |
| 879       | 719       | V   | E0406a | dipropyl 2-yl butanedioate            | 924-88-9   | 1.0   | 298.15 | 980.26                            | <sup>116</sup> | 70.80                               | <sup>114</sup> | -      | -              | -      | -              | -      | -              | (6.11)     | -              |
| 880       | 720       | V   | E0407a | diethyl 2-propylpropanedioate         | 2163-48-6  | 1.0   | 298.15 | 982.75                            | <sup>116</sup> | -                                   | -              | -      | -              | 494.15 | <sup>121</sup> | -      | -              | (6.11)     | -              |
| 881       | 720       | V   | E0407b | diethyl 2-propylpropanedioate         | 2163-48-6  | 1.0   | 494.15 | -                                 | -              | 43.32                               | <sup>121</sup> | -      | -              | 494.15 | <sup>121</sup> | -      | -              | (6.11)     | -              |
| 882       | 721       | V   | E0408a | dibutyl oxalate                       | 2050-60-4  | 1.0   | 298.15 | 983.33                            | <sup>116</sup> | 71.40                               | <sup>114</sup> | 242.65 | <sup>120</sup> | 514.15 | <sup>121</sup> | -      | -              | (6.11)     | -              |
| 883       | 722       | V   | E0409a | dipropyl butanedioate                 | 925-15-5   | 1.0   | 298.15 | 997.36                            | <sup>116</sup> | 71.00                               | <sup>114</sup> | 267.25 | <sup>120</sup> | 523.95 | <sup>121</sup> | -      | -              | (6.11)     | -              |
| 884       | 723       | V   | E0410a | diethyl hexanedioate                  | 141-28-6   | 1.0   | 298.15 | 1003.70                           | <sup>116</sup> | 73.00                               | <sup>114</sup> | 253.15 | <sup>120</sup> | 518.15 | <sup>121</sup> | -      | -              | 6.109      | <sup>120</sup> |
| 885       | 724       | V   | E0411a | dimethyl octanedioate                 | 1732-09-8  | 1.0   | 298.15 | 1019.17                           | <sup>116</sup> | 78.10                               | <sup>114</sup> | 279.15 | <sup>120</sup> | 541.15 | <sup>121</sup> | -      | -              | (6.11)     | -              |
| 886       | 725       | V   | E0412a | 2-butanoyloxyethyl butanoate          | 105-72-6   | 1.0   | 298.15 | 995.30                            | <sup>116</sup> | 73.20                               | <sup>114</sup> | -      | -              | 513.15 | <sup>121</sup> | -      | -              | (6.11)     | -              |
| 887       | 726       | V   | F7202a | hexyl formate                         | 629-33-4   | 1.0   | 298.15 | 874.61                            | <sup>116</sup> | 50.00                               | <sup>114</sup> | 210.55 | <sup>120</sup> | 428.65 | <sup>121</sup> | 586.34 | <sup>121</sup> | (6.91)     | -              |
| 888       | 727       | V   | F8201a | heptyl formate                        | 112-23-2   | 1.0   | 302.25 | 869.00                            | <sup>116</sup> | 53.80                               | <sup>114</sup> | -      | -              | 451.25 | <sup>121</sup> | 606.49 | <sup>121</sup> | (6.91)     | -              |
| 889       | 728       | V   | F9201a | octyl formate                         | 112-32-3   | 1.0   | 298.15 | 871.00                            | <sup>116</sup> | 58.20                               | <sup>114</sup> | 234.05 | <sup>120</sup> | 471.95 | <sup>121</sup> | 625.31 | <sup>121</sup> | (6.91)     | -              |
| 890       | 729       | V   | F0203a | nonyl formate                         | 5451-92-3  | 1.0   | 293.15 | 867.00                            | <sup>116</sup> | -                                   | -              | 240.15 | <sup>120</sup> | 485.72 | <sup>121</sup> | 643.00 | <sup>121</sup> | (6.91)     | -              |
| 891       | 730       | V   | L7101a | 2,3,3-trimethylbutan-2-ol             | 594-83-2   | 1.0   | 298.15 | 833.50                            | <sup>115</sup> | -                                   | -              | 290.15 | <sup>120</sup> | 404.15 | <sup>121</sup> | 619.68 | <sup>121</sup> | (6.16)     | -              |
| 892       | 730       | V   | L7101b | 2,3,3-trimethylbutan-2-ol             | 594-83-2   | 1.0   | 313.0  | -                                 | -              | 48.70                               | <sup>114</sup> | 290.15 | <sup>120</sup> | 404.15 | <sup>121</sup> | 619.68 | <sup>121</sup> | (6.16)     | -              |
| 893       | 731       | V   | L7102a | 2,2,3-trimethylbutan-1-ol             | 55505-23-2 | 1.0   | 293.15 | 846.60                            | <sup>115</sup> | -                                   | -              | -      | -              | 430.15 | <sup>121</sup> | 619.68 | <sup>121</sup> | (6.16)     | -              |
| 894       | 732       | V   | L7103a | 3,3-dimethylpentan-2-ol               | 19781-24-9 | 1.0   | 293.15 | 827.00                            | <sup>115</sup> | -                                   | -              | -      | -              | 420.15 | <sup>121</sup> | 619.68 | <sup>121</sup> | (6.16)     | -              |
| 895       | 733       | V   | L7104a | 2,3-dimethylpentan-3-ol               | 595-41-5   | 1.0   | 298.15 | 837.27                            | <sup>115</sup> | -                                   | -              | -      | -              | 413.15 | <sup>121</sup> | 619.68 | <sup>121</sup> | (6.16)     | -              |
| 896       | 733       | V   | L7104b | 2,3-dimethylpentan-3-ol               | 595-41-5   | 1.0   | 333.0  | -                                 | -              | 53.20                               | <sup>114</sup> | -      | -              | 413.15 | <sup>121</sup> | 619.68 | <sup>121</sup> | (6.16)     | -              |
| 897       | 734       | V   | L7105a | 2,3,3-trimethylbutan-1-ol             | 36794-64-6 | 1.0   | 298.15 | 823.80                            | <sup>115</sup> | -                                   | -              | -      | -              | 433.15 | <sup>121</sup> | 619.68 | <sup>121</sup> | (6.16)     | -              |
| 898       | 735       | V   | L7106a | 2,2-dimethylpentan-3-ol               | 3970-62-5  | 1.0   | 298.15 | 822.40                            | <sup>115</sup> | -                                   | -              | 282.45 | <sup>120</sup> | 409.15 | <sup>121</sup> | 619.68 | <sup>121</sup> | (6.16)     | -              |
| 899       | 735       | V   | L7106b | 2,2-dimethylpentan-3-ol               | 3970-62-5  | 1.0   | 333.0  | -                                 | -              | 51.40                               | <sup>114</sup> | 282.45 | <sup>120</sup> | 409.15 | <sup>121</sup> | 619.68 | <sup>121</sup> | (6.16)     | -              |
| 900       | 736       | V   | L7107a | 2,3-dimethylpentan-2-ol               | 4911-70-0  | 1.0   | 298.15 | 828.50                            | <sup>115</sup> | -                                   | -              | -      | -              | 412.15 | <sup>121</sup> | 619.68 | <sup>121</sup> | (6.16)     | -              |
| 901       | 737       | V   | L7108a | 4,4-dimethylpentan-2-ol               | 6144-93-0  | 1.0   | 293.15 | 811.90                            | <sup>115</sup> | -                                   | -              | -      | -              | 411.15 | <sup>121</sup> | 619.68 | <sup>121</sup> | (6.16)     | -              |
| 902       | 738       | V   | L7109a | 2,4-dimethylpentan-2-ol               | 625-06-9   | 1.0   | 298.15 | 810.00                            | <sup>115</sup> | -                                   | -              | -      | -              | 406.15 | <sup>121</sup> | 619.68 | <sup>121</sup> | (6.16)     | -              |
| 903       | 738       | V   | L7109b | 2,4-dimethylpentan-2-ol               | 625-06-9   | 1.0   | 343.0  | -                                 | -              | 49.70                               | <sup>114</sup> | -      | -              | 406.15 | <sup>121</sup> | 619.68 | <sup>121</sup> | (6.16)     | -              |
| 904       | 739       | V   | L7110a | 3,4-dimethylpentan-2-ol               | 64502-86-9 | 1.0   | 294.15 | 836.00                            | <sup>115</sup> | -                                   | -              | -      | -              | 426.15 | <sup>121</sup> | 619.68 | <sup>121</sup> | (6.16)     | -              |
| 905       | 740       | V   | L7111a | 2,4-dimethylpentan-3-ol               | 600-36-2   | 1.0   | 298.15 | 824.94                            | <sup>115</sup> | -                                   | -              | -      | -              | 411.95 | <sup>121</sup> | 619.68 | <sup>121</sup> | (6.16)     | -              |
| 906       | 740       | V   | L7111b | 2,4-dimethylpentan-3-ol               | 600-36-2   | 1.0   | 322.0  | -                                 | -              | 53.60                               | <sup>114</sup> | -      | -              | 411.95 | <sup>121</sup> | 619.68 | <sup>121</sup> | (6.16)     | -              |
| 907       | 741       | V   | L7112a | 2-ethyl-2-methylbutan-1-ol            | 18371-13-6 | 1.0   | 293.15 | 828.20                            | <sup>115</sup> | -                                   | -              | -      | -              | 430.15 | <sup>121</sup> | 619.68 | <sup>121</sup> | (6.16)     | -              |
| 908       | 741       | V   | L7112b | 2-ethyl-2-methylbutan-1-ol            | 18371-13-6 | 1.0   | 373.0  | -                                 | -              | 55.70                               | <sup>114</sup> | -      | -              | 430.15 | <sup>121</sup> | 619.68 | <sup>121</sup> | (6.16)     | -              |
| 909       | 742       | V   | L7113a | 3-ethylpentan-3-ol                    | 597-49-9   | 1.0   | 298.15 | 839.56                            | <sup>115</sup> | 57.30                               | <sup>114</sup> | 260.15 | <sup>120</sup> | 415.65 | <sup>121</sup> | 619.68 | <sup>121</sup> | 3.158      | <sup>120</sup> |

Table S.1 – Reference experimental data (continued)

| $n_{\text{sim}}$ | $n_{\text{iso}}$ | Set | Code   | Name                           | CAS        | $P$   | $T$    | $\rho_{\text{liq}}$   | Src | $\Delta H_{\text{vap}}$ | Src | $T_m$  | Src | $T_b$  | Src | $T_c$  | Src | $\epsilon$ | Src |
|------------------|------------------|-----|--------|--------------------------------|------------|-------|--------|-----------------------|-----|-------------------------|-----|--------|-----|--------|-----|--------|-----|------------|-----|
|                  |                  |     |        |                                |            | [bar] | [K]    | [kg·m <sup>-3</sup> ] |     | [kJ·mol <sup>-1</sup> ] |     | [K]    |     | [K]    |     |        |     |            |     |
| 910              | 743              | V   | L7114a | 3,3-dimethylpentan-1-ol        | 19264-94-9 | 1.0   | 293.15 | 832.00                | 115 | -                       | -   | -      | -   | 438.15 | 121 | 619.68 | 121 | (6.16)     | -   |
| 911              | 744              | V   | L7115a | 2,2-dimethylpentan-1-ol        | 2370-12-9  | 1.0   | 293.15 | 837.90                | 115 | -                       | -   | -      | -   | 426.15 | 121 | 619.68 | 121 | 6.020      | 120 |
| 912              | 745              | V   | L7116a | 3-methylhexan-3-ol             | 597-96-6   | 1.0   | 298.15 | 820.18                | 115 | -                       | -   | -      | -   | 415.95 | 121 | 619.68 | 121 | 3.248      | 120 |
| 913              | 745              | V   | L7116b | 3-methylhexan-3-ol             | 597-96-6   | 1.0   | 338.0  | -                     | -   | 53.60                   | 114 | -      | -   | 415.95 | 121 | 619.68 | 121 | 3.248      | 120 |
| 914              | 746              | V   | L7117a | 4,4-dimethylpentan-1-ol        | 3121-79-7  | 1.0   | 293.15 | 815.10                | 115 | -                       | -   | -      | -   | 433.15 | 121 | 619.68 | 121 | (6.16)     | -   |
| 915              | 747              | V   | L7118a | 2-methylhexan-2-ol             | 625-23-0   | 1.0   | 298.15 | 809.80                | 115 | 58.60                   | 114 | -      | -   | 415.95 | 121 | 619.68 | 121 | 3.257      | 120 |
| 916              | 748              | V   | L7119a | 2-ethyl-3-methylbutan-1-ol     | 32444-34-1 | 1.0   | 298.15 | 832.70                | 115 | -                       | -   | -      | -   | 435.15 | 121 | 619.68 | 121 | (6.16)     | -   |
| 917              | 749              | V   | L7120a | 3-ethylpentan-2-ol             | 609-27-8   | 1.0   | 298.15 | 833.30                | 115 | -                       | -   | -      | -   | 425.15 | 121 | 619.68 | 121 | (6.16)     | -   |
| 918              | 750              | V   | L7121a | 2,3-dimethylpentan-1-ol        | 10143-23-4 | 1.0   | 296.15 | 836.00                | 115 | -                       | -   | -      | -   | 437.15 | 121 | 619.68 | 121 | (6.16)     | -   |
| 919              | 751              | V   | L7122a | 4-methylhexan-3-ol             | 615-29-2   | 0.01  | 314.89 | 805.69                | 121 | -                       | -   | -      | -   | 422.15 | 121 | 619.68 | 121 | (6.16)     | -   |
| 920              | 752              | V   | L7123a | 3,4-dimethylpentan-1-ol        | 6570-87-2  | 1.0   | 297.15 | 819.00                | 115 | -                       | -   | -      | -   | 438.15 | 121 | 619.68 | 121 | (6.16)     | -   |
| 921              | 753              | V   | L7124a | 3-methylhexan-2-ol             | 2313-65-7  | 1.0   | 298.15 | 822.00                | 120 | -                       | -   | -      | -   | 425.15 | 121 | 619.68 | 121 | 4.990      | 120 |
| 922              | 754              | V   | L7125a | 2-methylhexan-3-ol             | 617-29-8   | 1.0   | 293.15 | 823.90                | 115 | -                       | -   | -      | -   | 418.15 | 121 | 619.68 | 121 | (6.16)     | -   |
| 923              | 754              | V   | L7125b | 2-methylhexan-3-ol             | 617-29-8   | 1.0   | 338.0  | -                     | -   | 55.70                   | 114 | -      | -   | 418.15 | 121 | 619.68 | 121 | (6.16)     | -   |
| 924              | 755              | V   | L7126a | 2,4-dimethylpentan-1-ol        | 6305-71-1  | 1.0   | 298.15 | 816.00                | 115 | -                       | -   | -      | -   | 432.15 | 121 | 619.68 | 121 | (6.16)     | -   |
| 925              | 756              | V   | L7127a | 4-methylhexan-2-ol             | 2313-61-3  | 1.0   | 298.15 | 817.70                | 115 | -                       | -   | -      | -   | 424.15 | 121 | 619.68 | 121 | (6.16)     | -   |
| 926              | 757              | V   | L7128a | 5-methylhexan-3-ol             | 623-55-2   | 1.0   | 293.15 | 833.10                | 115 | 59.80                   | 114 | -      | -   | 421.15 | 121 | 619.68 | 121 | (6.16)     | -   |
| 927              | 758              | V   | L7129a | 5-methylhexan-2-ol             | 627-59-8   | 1.0   | 293.15 | 813.10                | 115 | -                       | -   | -      | -   | 424.15 | 121 | 619.68 | 121 | (6.16)     | -   |
| 928              | 759              | V   | L7130a | 3-ethylpentan-1-ol             | 66225-51-2 | 0.01  | 328.67 | 803.52                | 121 | -                       | -   | -      | -   | 439.15 | 121 | 619.68 | 121 | (6.16)     | -   |
| 929              | 760              | V   | L7131a | 2-ethylpentan-1-ol             | 27522-11-8 | 1.0   | 298.15 | 828.80                | 115 | -                       | -   | -      | -   | 439.15 | 121 | 619.68 | 121 | (6.16)     | -   |
| 930              | 761              | V   | L7132a | 3-methylhexan-1-ol             | 13231-81-7 | 1.0   | 298.15 | 824.50                | 115 | -                       | -   | -      | -   | 445.15 | 121 | 619.68 | 121 | (6.16)     | -   |
| 931              | 762              | V   | L7133a | 4-methylhexan-1-ol             | 818-49-5   | 1.0   | 297.15 | 821.00                | 115 | -                       | -   | -      | -   | 446.15 | 121 | 619.68 | 121 | (6.16)     | -   |
| 932              | 762              | V   | L7133b | 4-methylhexan-1-ol             | 818-49-5   | 1.0   | 363.0  | -                     | -   | 62.60                   | 114 | -      | -   | 446.15 | 121 | 619.68 | 121 | (6.16)     | -   |
| 933              | 763              | V   | L7134a | 2-methylhexan-1-ol             | 624-22-6   | 1.0   | 293.15 | 827.00                | 115 | -                       | -   | -      | -   | 436.15 | 121 | 619.68 | 121 | 10.65      | 122 |
| 934              | 764              | V   | L7135a | heptan-4-ol                    | 589-55-9   | 1.0   | 298.15 | 815.60                | 115 | 62.40                   | 114 | 231.95 | 120 | 427.85 | 121 | 619.68 | 121 | 6.18       | 120 |
| 935              | 765              | V   | L7136a | heptan-3-ol                    | 589-82-2   | 1.0   | 298.15 | 816.50                | 115 | -                       | -   | -      | -   | 429.85 | 121 | 619.68 | 121 | (6.16)     | -   |
| 936              | 765              | V   | L7136b | heptan-3-ol                    | 589-82-2   | 1.0   | 364.0  | -                     | -   | 53.10                   | 114 | -      | -   | 429.85 | 121 | 619.68 | 121 | (6.16)     | -   |
| 937              | 766              | V   | L7137a | 5-methylhexan-1-ol             | 627-98-5   | 1.0   | 298.15 | 819.20                | 115 | -                       | -   | -      | -   | 445.15 | 121 | 619.68 | 121 | (6.16)     | -   |
| 938              | 767              | V   | L7138a | heptan-2-ol                    | 543-49-7   | 1.0   | 298.15 | 813.38                | 115 | 62.10                   | 114 | -      | -   | 432.35 | 121 | 608.32 | 121 | (6.16)     | -   |
| 939              | 768              | V   | L7139a | heptan-1-ol                    | 111-70-6   | 1.0   | 298.15 | 819.17                | 115 | 66.50                   | 114 | 239.95 | 120 | 449.45 | 121 | 632.60 | 121 | 11.75      | 120 |
| 940              | 769              | V   | L8102a | 2,3,3-trimethylpentan-2-ol     | 23171-85-9 | 1.0   | 298.15 | 815.10                | 115 | -                       | -   | -      | -   | 433.15 | 121 | 641.41 | 121 | (5.46)     | -   |
| 941              | 770              | V   | L8103a | 2,2,3-trimethylpentan-3-ol     | 7294-05-5  | 1.0   | 298.15 | 842.91                | 115 | -                       | -   | -      | -   | 425.15 | 121 | 641.41 | 121 | (5.46)     | -   |
| 942              | 770              | V   | L8103b | 2,2,3-trimethylpentan-3-ol     | 7294-05-5  | 1.0   | 333.0  | -                     | -   | 47.30                   | 114 | -      | -   | 425.15 | 121 | 641.41 | 121 | (5.46)     | -   |
| 943              | 771              | V   | L8104a | 2,4,4-trimethylpentan-2-ol     | 690-37-9   | 1.0   | 293.15 | 823.70                | 115 | -                       | -   | 253.15 | 120 | 419.55 | 121 | 641.41 | 121 | (5.46)     | -   |
| 944              | 772              | V   | L8105a | 3,3,4-trimethylpentan-2-ol     | 19411-41-7 | 1.0   | 293.15 | 855.70                | 115 | -                       | -   | -      | -   | 438.15 | 121 | 641.41 | 121 | (5.46)     | -   |
| 945              | 773              | V   | L8106a | 2,3,4-trimethylpentan-3-ol     | 3054-92-0  | 1.0   | 293.15 | 849.20                | 115 | -                       | -   | -      | -   | 430.15 | 121 | 641.41 | 121 | (5.46)     | -   |
| 946              | 774              | V   | L8107a | 3,4,4-trimethylpentan-2-ol     | 10575-56-1 | 1.0   | 293.15 | 840.80                | 115 | -                       | -   | -      | -   | 431.15 | 121 | 641.41 | 121 | (5.46)     | -   |
| 947              | 775              | V   | L8108a | 2,2,4-trimethylpentan-3-ol     | 5162-48-1  | 1.0   | 293.15 | 832.40                | 115 | -                       | -   | 260.15 | 120 | 424.15 | 121 | 641.41 | 121 | (5.46)     | -   |
| 948              | 775              | V   | L8108b | 2,2,4-trimethylpentan-3-ol     | 5162-48-1  | 1.0   | 343.0  | -                     | -   | 57.10                   | 114 | 260.15 | 120 | 424.15 | 121 | 641.41 | 121 | (5.46)     | -   |
| 949              | 776              | V   | L8109a | 2,3,4-trimethylpentan-2-ol     | 66576-26-9 | 1.0   | 293.15 | 808.00                | 115 | -                       | -   | -      | -   | 431.15 | 121 | 641.41 | 121 | (5.46)     | -   |
| 950              | 777              | V   | L8110a | 3-ethyl-3-methylpentan-2-ol    | 66576-22-5 | 1.0   | 293.15 | 857.60                | 115 | -                       | -   | -      | -   | 433.00 | 121 | 641.41 | 121 | (5.46)     | -   |
| 951              | 778              | V   | L8111a | 3-ethyl-2-methylpentan-3-ol    | 597-05-7   | 1.0   | 293.15 | 829.50                | 115 | -                       | -   | -      | -   | 433.15 | 121 | 641.41 | 121 | (5.46)     | -   |
| 952              | 779              | V   | L8112a | 4,4-dimethylhexan-3-ol         | 19550-09-5 | 1.0   | 293.15 | 834.10                | 115 | -                       | -   | -      | -   | 432.15 | 121 | 641.41 | 121 | (5.46)     | -   |
| 953              | 780              | V   | L8113a | 3,3-dimethylhexan-2-ol         | 22025-20-3 | 1.0   | 293.15 | 845.70                | 115 | -                       | -   | -      | -   | 433.00 | 121 | 641.41 | 121 | (5.46)     | -   |
| 954              | 781              | V   | L8114a | 3,4-dimethylhexan-3-ol         | 19550-08-4 | 1.0   | 298.15 | 834.50                | 115 | -                       | -   | -      | -   | 425.15 | 121 | 641.41 | 121 | (5.46)     | -   |
| 955              | 782              | V   | L8115a | 2,3-dimethylhexan-3-ol         | 4166-46-5  | 1.0   | 293.15 | 837.10                | 115 | -                       | -   | -      | -   | 431.35 | 121 | 641.41 | 121 | (5.46)     | -   |
| 956              | 783              | V   | L8116a | 2-ethyl-3,3-dimethylbutan-1-ol | 66576-56-5 | 1.0   | 298.15 | 842.50                | 115 | -                       | -   | -      | -   | 446.00 | 121 | 641.41 | 121 | (5.46)     | -   |
| 957              | 784              | V   | L8118a | 2,2-dimethylhexan-3-ol         | 4209-90-9  | 1.0   | 293.15 | 834.20                | 115 | -                       | -   | -      | -   | 429.25 | 121 | 641.41 | 121 | (5.46)     | -   |

Table S.1 – Reference experimental data (continued)

| $n_{sim}$ | $n_{iso}$ | Set | Code   | Name                             | CAS        | $P$<br>[bar] | $T$<br>[K] | $\rho_{liq}$<br>[kg·m <sup>-3</sup> ] | Src | $\Delta H_{vap}$<br>[kJ·mol <sup>-1</sup> ] | Src | $T_m$<br>[K] | Src | $T_b$<br>[K] | Src | $T_c$<br>[K] | Src | $\epsilon$ | Src |
|-----------|-----------|-----|--------|----------------------------------|------------|--------------|------------|---------------------------------------|-----|---------------------------------------------|-----|--------------|-----|--------------|-----|--------------|-----|------------|-----|
| 958       | 785       | V   | L8119a | 3-ethyl-2-methylpentan-2-ol      | 19780-63-3 | 1.0          | 298.15     | 834.60                                | 115 | -                                           | -   | -            | -   | 430.95       | 121 | 641.41       | 121 | (5.46)     | -   |
| 959       | 786       | V   | L8120a | 2,3-dimethylhexan-2-ol           | 19550-03-9 | 1.0          | 298.15     | 831.00                                | 115 | -                                           | -   | -            | -   | 433.25       | 121 | 641.41       | 121 | (5.46)     | -   |
| 960       | 787       | V   | L8121a | 2,2,4-trimethylpentan-1-ol       | 123-44-4   | 1.0          | 293.15     | 838.40                                | 115 | -                                           | -   | -            | -   | 441.45       | 121 | 641.41       | 121 | (5.46)     | -   |
| 961       | 787       | V   | L8121b | 2,2,4-trimethylpentan-1-ol       | 123-44-4   | 1.0          | 348.0      | -                                     | -   | 54.70                                       | 114 | -            | -   | 441.45       | 121 | 641.41       | 121 | (5.46)     | -   |
| 962       | 788       | V   | L8122a | 3,5-dimethylhexan-3-ol           | 4209-91-0  | 1.0          | 298.15     | 827.00                                | 115 | -                                           | -   | -            | -   | 425.15       | 121 | 641.41       | 121 | (5.46)     | -   |
| 963       | 789       | V   | L8123a | 2,4,4-trimethylpentan-1-ol       | 16325-63-6 | 1.0          | 293.15     | 833.00                                | 115 | -                                           | -   | -            | -   | 444.15       | 121 | 641.41       | 121 | (5.46)     | -   |
| 964       | 790       | V   | L8124a | 5,5-dimethylhexan-3-ol           | 66576-31-6 | 1.0          | 293.15     | 833.90                                | 115 | -                                           | -   | -            | -   | 426.15       | 121 | 641.41       | 121 | (5.46)     | -   |
| 965       | 791       | V   | L8126a | 2,4-dimethylhexan-2-ol           | 42328-76-7 | 1.0          | 301.15     | 806.50                                | 115 | -                                           | -   | -            | -   | 423.85       | 121 | 641.41       | 121 | (5.46)     | -   |
| 966       | 792       | V   | L8127a | 2,5-dimethylhexan-2-ol           | 3730-60-7  | 1.0          | 298.15     | 811.51                                | 115 | -                                           | -   | -            | -   | 425.65       | 121 | 641.41       | 121 | (5.46)     | -   |
| 967       | 793       | V   | L8128a | 3-methyl-2-propan-2-ylbutan-1-ol | 18593-92-5 | 1.0          | 298.15     | 842.50                                | 115 | -                                           | -   | -            | -   | 446.15       | 121 | 641.41       | 121 | (5.46)     | -   |
| 968       | 794       | V   | L8130a | 2,3,4-trimethylpentan-1-ol       | 6570-88-3  | 1.0          | 293.15     | 849.80                                | 115 | -                                           | -   | -            | -   | 456.15       | 121 | 641.41       | 121 | (5.46)     | -   |
| 969       | 795       | V   | L8131a | 3,4-dimethylhexan-2-ol           | 19550-05-1 | 0.01         | 331.02     | 805.00                                | 121 | -                                           | -   | -            | -   | 444.15       | 121 | 641.41       | 121 | (5.46)     | -   |
| 970       | 796       | V   | L8134a | 2,5-dimethylhexan-3-ol           | 19550-07-3 | 1.0          | 298.15     | 813.53                                | 115 | -                                           | -   | -            | -   | 432.15       | 121 | 641.41       | 121 | (5.46)     | -   |
| 971       | 796       | V   | L8134b | 2,5-dimethylhexan-3-ol           | 19550-07-3 | 1.0          | 352.0      | -                                     | -   | 55.00                                       | 114 | -            | -   | 432.15       | 121 | 641.41       | 121 | (5.46)     | -   |
| 972       | 797       | V   | L8137a | 3-ethylhexan-3-ol                | 597-76-2   | 1.0          | 298.15     | 834.20                                | 115 | -                                           | -   | -            | -   | 432.15       | 121 | 641.41       | 121 | (5.46)     | -   |
| 973       | 797       | V   | L8137b | 3-ethylhexan-3-ol                | 597-76-2   | 1.0          | 345.0      | -                                     | -   | 49.20                                       | 114 | -            | -   | 432.15       | 121 | 641.41       | 121 | (5.46)     | -   |
| 974       | 798       | V   | L8138a | 3,3-dimethylhexan-1-ol           | 10524-70-6 | 1.0          | 293.15     | 839.00                                | 115 | -                                           | -   | -            | -   | 454.00       | 121 | 641.41       | 121 | (5.46)     | -   |
| 975       | 799       | V   | L8140a | 2,2-dimethylhexan-1-ol           | 2370-13-0  | 1.0          | 293.15     | 826.50                                | 115 | -                                           | -   | -            | -   | 445.65       | 121 | 641.41       | 121 | 4.50       | 120 |
| 976       | 800       | V   | L8141a | 4-methylheptan-4-ol              | 598-01-6   | 1.0          | 298.15     | 820.20                                | 115 | -                                           | -   | 191.15       | 120 | 434.25       | 121 | 641.41       | 121 | 2.902      | 120 |
| 977       | 800       | V   | L8141b | 4-methylheptan-4-ol              | 598-01-6   | 1.0          | 345.0      | -                                     | -   | 54.80                                       | 114 | 191.15       | 120 | 434.25       | 121 | 641.41       | 121 | 2.902      | 120 |
| 978       | 801       | V   | L8142a | 3-methylheptan-3-ol              | 5582-82-1  | 1.0          | 298.15     | 824.90                                | 115 | -                                           | -   | 190.15       | 120 | 434.15       | 121 | 641.41       | 121 | 3.013      | 120 |
| 979       | 801       | V   | L8142b | 3-methylheptan-3-ol              | 5582-82-1  | 1.0          | 353.0      | -                                     | -   | 54.70                                       | 114 | 190.15       | 120 | 434.15       | 121 | 641.41       | 121 | 3.013      | 120 |
| 980       | 802       | V   | L8144a | 2-methylheptan-2-ol              | 625-25-2   | 1.0          | 298.15     | 805.00                                | 115 | -                                           | -   | 222.75       | 120 | 429.85       | 121 | 641.41       | 121 | 3.43       | 120 |
| 981       | 802       | V   | L8144b | 2-methylheptan-2-ol              | 625-25-2   | 1.0          | 358.0      | -                                     | -   | 53.10                                       | 114 | 222.75       | 120 | 429.85       | 121 | 641.41       | 121 | 3.43       | 120 |
| 982       | 803       | V   | L8145a | 4-ethylhexan-3-ol                | 19780-44-0 | 0.01         | 332.39     | 812.92                                | 121 | -                                           | -   | -            | -   | 437.15       | 121 | 641.41       | 121 | (5.46)     | -   |
| 983       | 804       | V   | L8146a | 4-methylheptan-3-ol              | 14979-39-6 | 1.0          | 298.15     | 794.16                                | 115 | -                                           | -   | 150.15       | 120 | 428.55       | 121 | 641.41       | 121 | 3.312      | 120 |
| 984       | 804       | V   | L8146b | 4-methylheptan-3-ol              | 14979-39-6 | 0.01         | 318.66     | -                                     | -   | 43.54                                       | 121 | 150.15       | 120 | 428.55       | 121 | 641.41       | 121 | 3.312      | 120 |
| 985       | 805       | V   | L8147a | 3-methylheptan-4-ol              | 1838-73-9  | 1.0          | 298.15     | 833.50                                | 115 | -                                           | -   | -            | -   | 437.85       | 121 | 641.41       | 121 | 7.46       | 120 |
| 986       | 805       | V   | L8147b | 3-methylheptan-4-ol              | 1838-73-9  | 1.0          | 355.0      | -                                     | -   | 48.00                                       | 114 | -            | -   | 437.85       | 121 | 641.41       | 121 | 7.46       | 120 |
| 987       | 806       | V   | L8148a | 3-methylheptan-2-ol              | 31367-46-1 | 1.0          | 298.15     | 817.63                                | 115 | -                                           | -   | -            | -   | 439.25       | 121 | 641.41       | 121 | 7.47       | 120 |
| 988       | 806       | V   | L8148b | 3-methylheptan-2-ol              | 31367-46-1 | 1.0          | 356.0      | -                                     | -   | 48.00                                       | 114 | -            | -   | 439.25       | 121 | 641.41       | 121 | 7.47       | 120 |
| 989       | 807       | V   | L8149a | 2-methylheptan-3-ol              | 18720-62-2 | 1.0          | 298.15     | 821.00                                | 115 | -                                           | -   | -            | -   | 440.75       | 121 | 641.41       | 121 | (5.46)     | -   |
| 990       | 807       | V   | L8149b | 2-methylheptan-3-ol              | 18720-62-2 | 1.0          | 364.0      | -                                     | -   | 54.80                                       | 114 | -            | -   | 440.75       | 121 | 641.41       | 121 | (5.46)     | -   |
| 991       | 808       | V   | L8150a | 2-ethyl-4-methylpentan-1-ol      | 106-67-2   | 1.0          | 293.15     | 827.30                                | 115 | -                                           | -   | -            | -   | 449.65       | 121 | 641.41       | 121 | (5.46)     | -   |
| 992       | 808       | V   | L8150b | 2-ethyl-4-methylpentan-1-ol      | 106-67-2   | 1.0          | 365.0      | -                                     | -   | 53.30                                       | 114 | -            | -   | 449.65       | 121 | 641.41       | 121 | (5.46)     | -   |
| 993       | 809       | V   | L8152a | 5-methylheptan-3-ol              | 18720-65-5 | 1.0          | 298.15     | 814.14                                | 115 | -                                           | -   | 181.95       | 120 | 426.75       | 121 | 641.41       | 121 | 3.832      | 120 |
| 994       | 810       | V   | L8153a | 3,5-dimethylhexan-1-ol           | 13501-73-0 | 1.0          | 293.15     | 828.20                                | 115 | -                                           | -   | -            | -   | 456.15       | 121 | 641.41       | 121 | (5.46)     | -   |
| 995       | 811       | V   | L8154a | 4-methylheptan-2-ol              | 56298-90-9 | 1.0          | 298.15     | 799.00                                | 115 | -                                           | -   | 171.15       | 120 | 444.75       | 121 | 641.41       | 121 | 3.59       | 120 |
| 996       | 811       | V   | L8154b | 4-methylheptan-2-ol              | 56298-90-9 | 1.0          | 366.0      | -                                     | -   | 54.20                                       | 114 | 171.15       | 120 | 444.75       | 121 | 641.41       | 121 | 3.59       | 120 |
| 997       | 812       | V   | L8155a | 2,5-dimethylhexan-1-ol           | 6886-16-4  | 1.0          | 298.15     | 824.54                                | 115 | -                                           | -   | -            | -   | 452.15       | 121 | 641.41       | 121 | (5.46)     | -   |
| 998       | 813       | V   | L8156a | 5-methylheptan-2-ol              | 54630-50-1 | 1.0          | 298.15     | 810.00                                | 115 | -                                           | -   | 212.15       | 120 | 445.05       | 121 | 641.41       | 121 | 7.5        | 120 |
| 999       | 813       | V   | L8156b | 5-methylheptan-2-ol              | 54630-50-1 | 1.0          | 363.0      | -                                     | -   | 47.20                                       | 114 | 212.15       | 120 | 445.05       | 121 | 641.41       | 121 | 7.5        | 120 |
| 1000      | 814       | V   | L8157a | 2-methylheptan-4-ol              | 21570-35-4 | 1.0          | 298.15     | 809.80                                | 115 | -                                           | -   | 192.15       | 120 | 439.25       | 121 | 641.41       | 121 | 3.338      | 120 |
| 1001      | 814       | V   | L8157b | 2-methylheptan-4-ol              | 21570-35-4 | 1.0          | 363.0      | -                                     | -   | 54.80                                       | 114 | 192.15       | 120 | 439.25       | 121 | 641.41       | 121 | 3.338      | 120 |
| 1002      | 815       | V   | L8158a | 6-methylheptan-3-ol              | 18720-66-6 | 1.0          | 298.15     | 776.60                                | 115 | -                                           | -   | -            | -   | 433.00       | 121 | 641.41       | 121 | (5.46)     | -   |
| 1003      | 816       | V   | L8159a | 6-methylheptan-2-ol              | 4730-22-7  | 1.0          | 298.15     | 803.40                                | 115 | -                                           | -   | 168.15       | 120 | 445.05       | 121 | 641.41       | 121 | 6.41       | 120 |
| 1004      | 816       | V   | L8159b | 6-methylheptan-2-ol              | 4730-22-7  | 1.0          | 369.0      | -                                     | -   | 55.20                                       | 114 | 168.15       | 120 | 445.05       | 121 | 641.41       | 121 | 6.41       | 120 |
| 1005      | 817       | V   | L8160a | 3-ethylhexan-1-ol                | 41065-95-6 | 1.0          | 301.15     | 829.00                                | 115 | -                                           | -   | -            | -   | 453.00       | 121 | 641.41       | 121 | (5.46)     | -   |

Table S.1 – Reference experimental data (continued)

| $n_{sim}$ | $n_{iso}$ | Set | Code   | Name                            | CAS        | $P$<br>[bar] | $T$<br>[K] | $\rho_{liq}$<br>[kg·m <sup>-3</sup> ] | Src | $\Delta H_{vap}$<br>[kJ·mol <sup>-1</sup> ] | Src | $T_m$<br>[K] | Src | $T_b$<br>[K] | Src | $T_c$<br>[K] | Src | $\epsilon$ | Src |
|-----------|-----------|-----|--------|---------------------------------|------------|--------------|------------|---------------------------------------|-----|---------------------------------------------|-----|--------------|-----|--------------|-----|--------------|-----|------------|-----|
| 1006      | 818       | V   | L8161a | 2-propylpentan-1-ol             | 58175-57-8 | 1.0          | 294.15     | 900.00                                | 115 | -                                           | -   | -            | -   | 452.15       | 121 | 641.41       | 121 | (5.46)     | -   |
| 1007      | 819       | V   | L8162a | 2-ethylhexan-1-ol               | 104-76-7   | 1.0          | 298.15     | 828.70                                | 115 | 68.50                                       | 114 | 203.15       | 120 | 457.75       | 121 | 640.60       | 121 | 7.58       | 120 |
| 1008      | 820       | V   | L8163a | 4-methylheptan-1-ol             | 817-91-4   | 1.0          | 298.15     | 806.02                                | 115 | -                                           | -   | -            | -   | 456.35       | 121 | 641.41       | 121 | 4.63       | 120 |
| 1009      | 820       | V   | L8163b | 4-methylheptan-1-ol             | 817-91-4   | 1.0          | 372.0      | -                                     | -   | 55.90                                       | 114 | -            | -   | 456.35       | 121 | 641.41       | 121 | 4.63       | 120 |
| 1010      | 821       | V   | L8164a | 3-methylheptan-1-ol             | 1070-32-2  | 1.0          | 298.15     | 784.50                                | 115 | -                                           | -   | 183.15       | 120 | 459.15       | 121 | 641.41       | 121 | 2.884      | 120 |
| 1011      | 821       | V   | L8164b | 3-methylheptan-1-ol             | 1070-32-2  | 1.0          | 375.0      | -                                     | -   | 53.40                                       | 114 | 183.15       | 120 | 459.15       | 121 | 641.41       | 121 | 2.884      | 120 |
| 1012      | 822       | V   | L8165a | 5-methylheptan-1-ol             | 7212-53-5  | 1.0          | 298.15     | 815.20                                | 115 | -                                           | -   | -            | -   | 459.75       | 121 | 641.41       | 121 | (5.46)     | -   |
| 1013      | 822       | V   | L8165b | 5-methylheptan-1-ol             | 7212-53-5  | 1.0          | 379.0      | -                                     | -   | 57.60                                       | 114 | -            | -   | 459.75       | 121 | 641.41       | 121 | (5.46)     | -   |
| 1014      | 823       | V   | L8166a | 2-methylheptan-1-ol             | 60435-70-3 | 1.0          | 298.15     | 798.70                                | 115 | -                                           | -   | -            | -   | 448.75       | 121 | 641.41       | 121 | (5.46)     | -   |
| 1015      | 824       | V   | L8167a | octan-4-ol                      | 589-62-8   | 1.0          | 298.15     | 815.90                                | 115 | 67.20                                       | 114 | -            | -   | 449.75       | 121 | 641.41       | 121 | (5.46)     | -   |
| 1016      | 825       | V   | L8168a | octan-3-ol                      | 589-98-0   | 1.0          | 298.15     | 817.01                                | 115 | -                                           | -   | 228.15       | 120 | 447.85       | 121 | 641.41       | 121 | 5.55       | 120 |
| 1017      | 826       | V   | L8169a | 6-methylheptan-1-ol             | 1653-40-3  | 1.0          | 298.15     | 817.56                                | 115 | -                                           | -   | 167.15       | 120 | 460.85       | 121 | 641.41       | 121 | 10.54      | 120 |
| 1018      | 826       | V   | L8169b | 6-methylheptan-1-ol             | 1653-40-3  | 1.0          | 383.0      | -                                     | -   | 61.00                                       | 114 | 167.15       | 120 | 460.85       | 121 | 641.41       | 121 | 10.54      | 120 |
| 1019      | 827       | V   | L8170a | octan-2-ol                      | 123-96-6   | 1.0          | 298.15     | 817.00                                | 115 | 67.90                                       | 114 | -            | -   | 452.95       | 121 | 629.60       | 121 | (5.46)     | -   |
| 1020      | 828       | V   | L8171a | octan-1-ol                      | 111-87-5   | 1.0          | 298.15     | 821.79                                | 115 | 70.10                                       | 114 | 258.45       | 120 | 468.35       | 121 | 652.50       | 121 | 10.30      | 120 |
| 1021      | 829       | V   | L9103a | 2,2,3,4-tetramethylpentan-3-ol  | 62185-29-9 | 0.01         | 344.93     | 813.97                                | 121 | -                                           | -   | -            | -   | 447.35       | 121 | 661.55       | 121 | (6.19)     | -   |
| 1022      | 830       | V   | L9107a | 3-ethyl-2,2-dimethylpentan-3-ol | 66793-96-2 | 1.0          | 298.15     | 852.60                                | 115 | -                                           | -   | -            | -   | 447.15       | 121 | 661.55       | 121 | (6.19)     | -   |
| 1023      | 831       | V   | L9108a | 3,4,4-trimethylhexan-3-ol       | 66793-74-6 | 1.0          | 294.15     | 832.30                                | 115 | -                                           | -   | -            | -   | 439.15       | 121 | 661.55       | 121 | (6.19)     | -   |
| 1024      | 832       | V   | L9109a | 2,2,3-trimethylhexan-3-ol       | 5340-41-0  | 1.0          | 293.15     | 846.20                                | 115 | -                                           | -   | -            | -   | 446.25       | 121 | 661.55       | 121 | (6.19)     | -   |
| 1025      | 832       | V   | L9109b | 2,2,3-trimethylhexan-3-ol       | 5340-41-0  | 1.0          | 358.0      | -                                     | -   | 55.10                                       | 114 | -            | -   | 446.25       | 121 | 661.55       | 121 | (6.19)     | -   |
| 1026      | 833       | V   | L9110a | 2,4,4-trimethylhexan-2-ol       | 66793-91-7 | 1.0          | 293.15     | 847.50                                | 115 | -                                           | -   | -            | -   | 466.00       | 121 | 661.55       | 121 | (6.19)     | -   |
| 1027      | 834       | V   | L9111a | 3,5,5-trimethylhexan-3-ol       | 66810-87-5 | 1.0          | 293.15     | 835.00                                | 115 | -                                           | -   | -            | -   | 439.00       | 121 | 661.55       | 121 | (6.19)     | -   |
| 1028      | 835       | V   | L9113a | 3-ethyl-2,4-dimethylpentan-3-ol | 3970-59-0  | 1.0          | 298.15     | 854.92                                | 115 | -                                           | -   | -            | -   | 451.05       | 121 | 661.55       | 121 | (6.19)     | -   |
| 1029      | 835       | V   | L9113b | 3-ethyl-2,4-dimethylpentan-3-ol | 3970-59-0  | 1.0          | 384.0      | -                                     | -   | 50.00                                       | 114 | -            | -   | 451.05       | 121 | 661.55       | 121 | (6.19)     | -   |
| 1030      | 836       | V   | L9115a | 2,4,4-trimethylhexan-3-ol       | 66793-92-8 | 1.0          | 293.15     | 848.80                                | 115 | -                                           | -   | -            | -   | 444.15       | 121 | 661.55       | 121 | (6.19)     | -   |
| 1031      | 837       | V   | L9116a | 2,3,5-trimethylhexan-3-ol       | 65927-60-8 | 1.0          | 293.15     | 825.60                                | 115 | -                                           | -   | -            | -   | 439.00       | 121 | 661.55       | 121 | (6.19)     | -   |
| 1032      | 838       | V   | L9119a | 2,2,5-trimethylhexan-3-ol       | 3970-60-3  | 0.01         | 333.57     | 758.13                                | 121 | -                                           | -   | -            | -   | 433.15       | 121 | 661.55       | 121 | (6.19)     | -   |
| 1033      | 839       | V   | L9120a | 2,3,4-trimethylhexan-2-ol       | 21102-13-6 | 1.0          | 288.15     | 835.30                                | 115 | -                                           | -   | -            | -   | 466.00       | 121 | 661.55       | 121 | (6.19)     | -   |
| 1034      | 840       | V   | L9121a | 2,5,5-trimethylhexan-3-ol       | 66793-72-4 | 1.0          | 293.15     | 825.00                                | 115 | -                                           | -   | -            | -   | 442.00       | 121 | 661.55       | 121 | (6.19)     | -   |
| 1035      | 841       | V   | L9122a | 2,4,5-trimethylhexan-2-ol       | 66793-93-9 | 0.01         | 359.85     | 778.46                                | 121 | -                                           | -   | -            | -   | 466.00       | 121 | 661.55       | 121 | (6.19)     | -   |
| 1036      | 842       | V   | L9124a | 3-ethyl-4-methylhexan-3-ol      | 51200-80-7 | 1.0          | 288.15     | 861.00                                | 115 | -                                           | -   | -            | -   | 452.00       | 121 | 661.55       | 121 | (6.19)     | -   |
| 1037      | 843       | V   | L9125a | 3-ethyl-2-methylhexan-3-ol      | 66794-03-4 | 1.0          | 298.15     | 844.50                                | 115 | -                                           | -   | -            | -   | 457.25       | 121 | 661.55       | 121 | (6.19)     | -   |
| 1038      | 844       | V   | L9128a | 4-ethyl-3-methylhexan-3-ol      | 66794-05-6 | 1.0          | 298.15     | 899.40                                | 115 | -                                           | -   | -            | -   | 452.00       | 121 | 661.55       | 121 | (6.19)     | -   |
| 1039      | 845       | V   | L9129a | 2,3-dimethylheptan-3-ol         | 19549-71-4 | 1.0          | 294.15     | 838.30                                | 115 | -                                           | -   | -            | -   | 447.15       | 121 | 661.55       | 121 | (6.19)     | -   |
| 1040      | 846       | V   | L9130a | 4,5,5-trimethylhexan-1-ol       | 66793-75-7 | 1.0          | 293.15     | 846.00                                | 115 | -                                           | -   | -            | -   | 475.15       | 121 | 661.55       | 121 | (6.19)     | -   |
| 1041      | 847       | V   | L9131a | 2,2-dimethylheptan-3-ol         | 19549-70-3 | 1.0          | 298.15     | 823.74                                | 115 | -                                           | -   | -            | -   | 451.00       | 121 | 661.55       | 121 | (6.19)     | -   |
| 1042      | 848       | V   | L9132a | 3-ethyl-2-methylhexan-2-ol      | 66794-02-3 | 1.0          | 298.15     | 833.40                                | 115 | -                                           | -   | -            | -   | 451.15       | 121 | 661.55       | 121 | (6.19)     | -   |
| 1043      | 849       | V   | L9133a | 2-ethyl-2,4-dimethylpentan-1-ol | 66793-98-4 | 1.0          | 298.15     | 837.00                                | 115 | -                                           | -   | -            | -   | 461.15       | 121 | 661.55       | 121 | (6.19)     | -   |
| 1044      | 850       | V   | L9134a | 3-ethyl-5-methylhexan-3-ol      | 597-77-3   | 1.0          | 295.15     | 839.60                                | 115 | -                                           | -   | -            | -   | 445.15       | 121 | 661.55       | 121 | (6.19)     | -   |
| 1045      | 851       | V   | L9136a | 3,5-dimethylheptan-3-ol         | 19549-74-7 | 1.0          | 298.15     | 821.83                                | 115 | -                                           | -   | -            | -   | 450.00       | 121 | 661.55       | 121 | (6.19)     | -   |
| 1046      | 852       | V   | L9137a | 2,4-dimethylheptan-4-ol         | 19549-77-0 | 1.0          | 293.15     | 824.20                                | 115 | -                                           | -   | -            | -   | 444.55       | 121 | 661.55       | 121 | (6.19)     | -   |
| 1047      | 853       | V   | L9138a | 3,6-dimethylheptan-3-ol         | 1573-28-0  | 1.0          | 289.15     | 828.50                                | 115 | -                                           | -   | -            | -   | 446.15       | 121 | 661.55       | 121 | (6.19)     | -   |
| 1048      | 854       | V   | L9139a | 3,5,5-trimethylhexan-1-ol       | 3452-97-9  | 1.0          | 298.15     | 823.60                                | 120 | 67.90                                       | 114 | -            | -   | 466.15       | 121 | 661.55       | 121 | (6.19)     | -   |
| 1049      | 855       | V   | L9141a | 2,4-dimethylheptan-2-ol         | 65822-93-7 | 1.0          | 298.15     | 828.00                                | 115 | -                                           | -   | -            | -   | 455.00       | 121 | 661.55       | 121 | (6.19)     | -   |
| 1050      | 856       | V   | L9142a | 2,5-dimethylheptan-2-ol         | 1561-18-8  | 1.0          | 295.15     | 830.00                                | 115 | -                                           | -   | -            | -   | -            | -   | -            | -   | (6.19)     | -   |
| 1051      | 857       | V   | L9143a | 2,6-dimethylheptan-2-ol         | 13254-34-7 | 1.0          | 293.15     | 818.60                                | 120 | -                                           | -   | -            | -   | 444.15       | 121 | 661.55       | 121 | (6.19)     | -   |
| 1052      | 858       | V   | L9144a | 4-ethyl-2-methylhexan-3-ol      | 33943-21-4 | 1.0          | 293.15     | 827.50                                | 115 | -                                           | -   | -            | -   | 452.00       | 121 | 661.55       | 121 | (6.19)     | -   |
| 1053      | 859       | V   | L9145a | 3,5-dimethylheptan-4-ol         | 19549-79-2 | 1.0          | 293.15     | 859.20                                | 115 | -                                           | -   | -            | -   | 460.15       | 121 | 661.55       | 121 | (6.19)     | -   |

Table S.1 – Reference experimental data (continued)

| $n_{sim}$ | $n_{iso}$ | Set | Code   | Name                               | CAS        | $P$<br>[bar] | $T$<br>[K] | $\rho_{liq}$<br>[kg·m <sup>-3</sup> ] | Src | $\Delta H_{vap}$<br>[kJ·mol <sup>-1</sup> ] | Src | $T_m$<br>[K] | Src | $T_b$<br>[K] | Src | $T_c$<br>[K] | Src | $\epsilon$ | Src    |   |
|-----------|-----------|-----|--------|------------------------------------|------------|--------------|------------|---------------------------------------|-----|---------------------------------------------|-----|--------------|-----|--------------|-----|--------------|-----|------------|--------|---|
| 1054      | 860       | V   | L9147a | 2,6-dimethylheptan-3-ol            | 19549-73-6 | 1.0          | 293.15     | 814.80                                | 115 | -                                           | -   | -            | -   | 448.15       | 121 | 661.55       | 121 | (6.19)     | -      |   |
| 1055      | 861       | V   | L9148a | 4,6-dimethylheptan-2-ol            | 51079-52-8 | 1.0          | 273.15     | 878.70                                | 115 | -                                           | -   | -            | -   | 467.15       | 121 | 661.55       | 121 | (6.19)     | -      |   |
| 1056      | 862       | V   | L9149a | 2,6-dimethylheptan-4-ol            | 108-82-7   | 1.0          | 298.15     | 806.43                                | 115 | 65.20                                       | 114 | -            | -   | 451.00       | 121 | 661.55       | 121 | (6.19)     | -      |   |
| 1057      | 863       | V   | L9150a | 4-ethylheptan-4-ol                 | 597-90-0   | 1.0          | 298.15     | 829.90                                | 115 | -                                           | -   | -            | -   | 452.15       | 121 | 661.55       | 121 | (6.19)     | -      |   |
| 1058      | 864       | V   | L9151a | 3-ethylheptan-3-ol                 | 19780-41-7 | 1.0          | 298.15     | 829.90                                | 115 | -                                           | -   | -            | -   | 455.35       | 121 | 661.55       | 121 | (6.19)     | -      |   |
| 1059      | 865       | V   | L9153a | 4-methyloctan-4-ol                 | 23418-37-3 | 1.0          | 298.15     | 824.56                                | 115 | -                                           | -   | -            | -   | 454.15       | 121 | 661.55       | 121 | (6.19)     | -      |   |
| 1060      | 866       | V   | L9154a | 3-methyloctan-3-ol                 | 5340-36-3  | 1.0          | 298.15     | 827.50                                | 115 | -                                           | -   | -            | -   | -            | -   | -            | -   | (6.19)     | -      |   |
| 1061      | 866       | V   | L9154b | 3-methyloctan-3-ol                 | 5340-36-3  | 1.0          | 368.0      | -                                     | -   | 53.20                                       | 114 | -            | -   | -            | -   | -            | -   | -          | (6.19) | - |
| 1062      | 867       | V   | L9155a | 6,6-dimethylheptan-1-ol            | 65769-10-0 | 1.0          | 293.15     | 843.90                                | 115 | -                                           | -   | -            | -   | 455.00       | 121 | 661.55       | 121 | (6.19)     | -      |   |
| 1063      | 868       | V   | L9156a | 2-methyloctan-2-ol                 | 628-44-4   | 1.0          | 298.15     | 813.40                                | 115 | -                                           | -   | -            | -   | 451.15       | 121 | 661.55       | 121 | (6.19)     | -      |   |
| 1064      | 868       | V   | L9156b | 2-methyloctan-2-ol                 | 628-44-4   | 1.0          | 353.0      | -                                     | -   | 64.60                                       | 114 | -            | -   | 451.15       | 121 | 661.55       | 121 | (6.19)     | -      |   |
| 1065      | 869       | V   | L9157a | 2-ethyl-3-methylhexan-1-ol         | 66794-04-5 | 1.0          | 298.15     | 835.80                                | 115 | -                                           | -   | -            | -   | 466.15       | 121 | 661.55       | 121 | (6.19)     | -      |   |
| 1066      | 870       | V   | L9159a | 5-methyloctan-4-ol                 | 59734-23-5 | 1.0          | 298.15     | 815.60                                | 115 | -                                           | -   | -            | -   | 455.00       | 121 | 661.55       | 121 | (6.19)     | -      |   |
| 1067      | 871       | V   | L9160a | 4-methyloctan-3-ol                 | 66793-80-4 | 1.0          | 298.15     | 843.70                                | 115 | -                                           | -   | -            | -   | 459.00       | 121 | 661.55       | 121 | (6.19)     | -      |   |
| 1068      | 872       | V   | L9161a | 3-methyloctan-4-ol                 | 26533-35-7 | 1.0          | 291.15     | 834.00                                | 115 | -                                           | -   | -            | -   | 453.15       | 121 | 661.55       | 121 | (6.19)     | -      |   |
| 1069      | 873       | V   | L9162a | 3-methyloctan-2-ol                 | 27644-49-1 | 1.0          | 300.15     | 831.00                                | 115 | -                                           | -   | -            | -   | 454.00       | 121 | 661.55       | 121 | (6.19)     | -      |   |
| 1070      | 874       | V   | L9163a | 2-methyloctan-3-ol                 | 26533-34-6 | 1.0          | 293.15     | 827.00                                | 115 | -                                           | -   | -            | -   | 457.15       | 121 | 661.55       | 121 | (6.19)     | -      |   |
| 1071      | 874       | V   | L9163b | 2-methyloctan-3-ol                 | 26533-34-6 | 1.0          | 403.0      | -                                     | -   | 49.50                                       | 114 | -            | -   | 457.15       | 121 | 661.55       | 121 | (6.19)     | -      |   |
| 1072      | 875       | V   | L9164a | 2-ethyl-4-methylhexan-1-ol         | 66794-06-7 | 1.0          | 293.15     | 828.80                                | 115 | -                                           | -   | -            | -   | 468.15       | 121 | 661.55       | 121 | (6.19)     | -      |   |
| 1073      | 876       | V   | L9165a | 4-methyl-2-propylpentan-1-ol       | 54004-41-0 | 1.0          | 293.15     | 825.60                                | 115 | -                                           | -   | -            | -   | 465.15       | 121 | 661.55       | 121 | (6.19)     | -      |   |
| 1074      | 877       | V   | L9166a | 2-ethyl-5-methylhexan-1-ol         | 66794-07-8 | 1.0          | 298.15     | 820.80                                | 115 | -                                           | -   | -            | -   | 466.00       | 121 | 661.55       | 121 | (6.19)     | -      |   |
| 1075      | 878       | V   | L9167a | 6-methyloctan-4-ol                 | 66793-82-6 | 1.0          | 296.15     | 822.00                                | 115 | -                                           | -   | -            | -   | 455.00       | 121 | 661.55       | 121 | (6.19)     | -      |   |
| 1076      | 879       | V   | L9169a | 6-methyloctan-3-ol                 | 40225-75-0 | 1.0          | 301.15     | 832.00                                | 115 | -                                           | -   | -            | -   | 459.00       | 121 | 661.55       | 121 | (6.19)     | -      |   |
| 1077      | 880       | V   | L9170a | 3,6-dimethylheptan-1-ol            | 1573-33-7  | 1.0          | 300.15     | 823.00                                | 115 | -                                           | -   | -            | -   | -            | -   | -            | -   | (6.19)     | -      |   |
| 1078      | 881       | V   | L9171a | 5-methyloctan-2-ol                 | 66793-81-5 | 1.0          | 298.15     | 821.00                                | 115 | -                                           | -   | -            | -   | 454.00       | 121 | 661.55       | 121 | (6.19)     | -      |   |
| 1079      | 882       | V   | L9172a | 2-methyloctan-4-ol                 | 40575-41-5 | 1.0          | 298.15     | 815.00                                | 115 | -                                           | -   | -            | -   | 457.15       | 121 | 661.55       | 121 | (6.19)     | -      |   |
| 1080      | 883       | V   | L9173a | 7-methyloctan-4-ol                 | 33933-77-6 | 1.0          | 293.15     | 813.60                                | 115 | -                                           | -   | -            | -   | 455.00       | 121 | 661.55       | 121 | (6.19)     | -      |   |
| 1081      | 884       | V   | L9174a | 7-methyloctan-3-ol                 | 66793-84-8 | 1.0          | 285.15     | 840.20                                | 115 | -                                           | -   | -            | -   | 459.00       | 121 | 661.55       | 121 | (6.19)     | -      |   |
| 1082      | 885       | V   | L9177a | 3-ethylheptan-1-ol                 | 3525-25-5  | 1.0          | 296.15     | 834.00                                | 115 | -                                           | -   | -            | -   | 480.15       | 121 | 661.55       | 121 | (6.19)     | -      |   |
| 1083      | 886       | V   | L9179a | 5-ethylheptan-1-ol                 | 998-65-2   | 1.0          | 298.15     | 848.00                                | 115 | -                                           | -   | -            | -   | 472.00       | 121 | 661.55       | 121 | (6.19)     | -      |   |
| 1084      | 887       | V   | L9181a | 4-methyloctan-1-ol                 | 38514-03-3 | 1.0          | 300.65     | 820.00                                | 115 | -                                           | -   | -            | -   | 473.00       | 121 | 661.55       | 121 | (6.19)     | -      |   |
| 1085      | 888       | V   | L9182a | 5-methyloctan-1-ol                 | 38514-04-4 | 1.0          | 297.15     | 828.00                                | 115 | -                                           | -   | -            | -   | 473.00       | 121 | 661.55       | 121 | (6.19)     | -      |   |
| 1086      | 889       | V   | L9183a | 3-methyloctan-1-ol                 | 38514-02-2 | 1.0          | 297.15     | 827.00                                | 115 | -                                           | -   | -            | -   | 473.00       | 121 | 661.55       | 121 | (6.19)     | -      |   |
| 1087      | 890       | V   | L9184a | 6-methyloctan-1-ol                 | 38514-05-5 | 0.01         | 370.37     | 770.37                                | 121 | -                                           | -   | -            | -   | 479.15       | 121 | 661.55       | 121 | (6.19)     | -      |   |
| 1088      | 891       | V   | L9185a | 2-methyloctan-1-ol                 | 818-81-5   | 1.0          | 277.15     | 841.80                                | 115 | -                                           | -   | -            | -   | 473.00       | 121 | 661.55       | 121 | (6.19)     | -      |   |
| 1089      | 892       | V   | L9186a | nonan-5-ol                         | 623-93-8   | 1.0          | 298.15     | 818.30                                | 115 | 71.40                                       | 114 | 278.75       | 120 | 468.25       | 121 | 661.55       | 121 | 3.54       | 120    |   |
| 1090      | 893       | V   | L9187a | nonan-4-ol                         | 5932-79-6  | 1.0          | 293.15     | 826.30                                | 115 | 71.50                                       | 114 | -            | -   | 466.15       | 121 | 661.55       | 121 | (6.19)     | -      |   |
| 1091      | 894       | V   | L9188a | nonan-3-ol                         | 624-51-1   | 1.0          | 298.15     | 823.55                                | 115 | 70.90                                       | 114 | -            | -   | 467.85       | 121 | 661.55       | 121 | (6.19)     | -      |   |
| 1092      | 895       | V   | L9189a | 7-methyloctan-1-ol                 | 2430-22-0  | 1.0          | 298.15     | 826.00                                | 115 | -                                           | -   | -            | -   | 479.15       | 121 | 661.55       | 121 | (6.19)     | -      |   |
| 1093      | 896       | V   | L9190a | nonan-2-ol                         | 628-99-9   | 1.0          | 298.15     | 819.35                                | 115 | 72.90                                       | 114 | -            | -   | 471.65       | 121 | 649.60       | 121 | (6.19)     | -      |   |
| 1094      | 897       | V   | L9191a | nonan-1-ol                         | 143-08-8   | 1.0          | 298.15     | 824.60                                | 115 | 72.20                                       | 114 | 268.15       | 120 | 486.25       | 121 | 670.70       | 121 | 8.83       | 120    |   |
| 1095      | 898       | V   | L0103a | 3-ethyl-2,2,4-trimethylpentan-3-ol | 66256-41-5 | 1.0          | 293.15     | 862.40                                | 115 | -                                           | -   | -            | -   | 464.15       | 121 | 680.37       | 121 | (5.30)     | -      |   |
| 1096      | 899       | V   | L0104a | 3,4,4,5-tetramethylhexan-3-ol      | 66256-39-1 | 1.0          | 293.15     | 874.20                                | 115 | -                                           | -   | -            | -   | 475.15       | 121 | 680.37       | 121 | (5.30)     | -      |   |
| 1097      | 900       | V   | L0105a | 2,3,4,4-tetramethylhexan-3-ol      | 66256-67-5 | 1.0          | 293.15     | 874.50                                | 115 | -                                           | -   | -            | -   | 474.15       | 121 | 680.37       | 121 | (5.30)     | -      |   |
| 1098      | 901       | V   | L0106a | 2,2,3,4-tetramethylhexan-3-ol      | 66256-63-1 | 1.0          | 293.15     | 858.40                                | 115 | -                                           | -   | -            | -   | 465.15       | 121 | 680.37       | 121 | (5.30)     | -      |   |
| 1099      | 902       | V   | L0107a | 2,2,3,5-tetramethylhexan-3-ol      | 66256-64-2 | 1.0          | 293.15     | 839.30                                | 115 | -                                           | -   | -            | -   | 513.48       | 121 | 680.37       | 121 | (5.30)     | -      |   |
| 1100      | 903       | V   | L0108a | 2,2,4,4-tetramethylhexan-3-ol      | 66256-65-3 | 1.0          | 293.15     | 854.90                                | 115 | -                                           | -   | -            | -   | 463.15       | 121 | 680.37       | 121 | (5.30)     | -      |   |
| 1101      | 904       | V   | L0111a | 3,4,5,5-tetramethylhexan-3-ol      | 66256-40-4 | 1.0          | 293.15     | 862.30                                | 115 | -                                           | -   | -            | -   | 468.15       | 121 | 680.37       | 121 | (5.30)     | -      |   |

Table S.1 – Reference experimental data (continued)

| $n_{sim}$ | $n_{iso}$ | Set | Code   | Name                                   | CAS        | $P$   | $T$    | $\rho_{liq}$          | Src | $\Delta H_{vap}$        | Src | $T_m$  | Src | $T_b$  | Src | $T_c$  | Src | $\epsilon$ | Src |
|-----------|-----------|-----|--------|----------------------------------------|------------|-------|--------|-----------------------|-----|-------------------------|-----|--------|-----|--------|-----|--------|-----|------------|-----|
|           |           |     |        |                                        |            | [bar] | [K]    | [kg·m <sup>-3</sup> ] |     | [kJ·mol <sup>-1</sup> ] |     | [K]    |     | [K]    |     |        |     |            |     |
| 1102      | 905       | V   | L0112a | 2,3,5,5-tetramethylhexan-3-ol          | 5396-09-8  | 1.0   | 293.15 | 837.80                | 115 | -                       | -   | -      | -   | 475.00 | 121 | 680.37 | 121 | (5.30)     | -   |
| 1103      | 906       | V   | L0115a | 2,4-dimethyl-3-propan-2-ylpentan-3-ol  | 51200-83-0 | 1.0   | 298.15 | 859.10                | 115 | -                       | -   | -      | -   | 467.65 | 121 | 680.37 | 121 | (5.30)     | -   |
| 1104      | 907       | V   | L0117a | 2,2,3-trimethylheptan-3-ol             | 29772-40-5 | 1.0   | 293.15 | 848.70                | 115 | -                       | -   | -      | -   | 459.15 | 121 | 680.37 | 121 | (5.30)     | -   |
| 1105      | 908       | V   | L0118a | 3-ethyl-5,5-dimethylhexan-3-ol         | 5340-62-5  | 1.0   | 293.15 | 842.80                | 115 | -                       | -   | -      | -   | 460.00 | 121 | 680.37 | 121 | (5.30)     | -   |
| 1106      | 909       | V   | L0119a | 3,5,5-trimethylheptan-3-ol             | 66256-50-6 | 1.0   | 293.15 | 854.30                | 115 | -                       | -   | -      | -   | 468.75 | 121 | 680.37 | 121 | (5.30)     | -   |
| 1107      | 910       | V   | L011aa | decan-2-ol                             | 1120-06-5  | 1.0   | 293.15 | 825.20                | 115 | -                       | -   | -      | -   | 490.15 | 121 | 680.37 | 121 | (5.30)     | -   |
| 1108      | 911       | V   | L011ba | decan-1-ol                             | 112-30-1   | 1.0   | 298.15 | 826.53                | 115 | 80.90                   | 114 | 280.15 | 120 | 503.35 | 121 | 687.30 | 121 | 7.93       | 120 |
| 1109      | 912       | V   | L0120a | 2,2,4-trimethylheptan-4-ol             | 57233-31-5 | 1.0   | 293.15 | 833.00                | 115 | -                       | -   | -      | -   | 454.15 | 121 | 680.37 | 121 | (5.30)     | -   |
| 1110      | 913       | V   | L0121a | 2-methyl-3-propan-2-ylhexan-3-ol       | 51200-81-8 | 1.0   | 293.15 | 853.70                | 115 | -                       | -   | -      | -   | 465.15 | 121 | 680.37 | 121 | (5.30)     | -   |
| 1111      | 914       | V   | L0122a | 4-ethyl-2,4-dimethylhexan-3-ol         | 66719-48-0 | 1.0   | 293.15 | 860.60                | 115 | -                       | -   | -      | -   | 460.00 | 121 | 680.37 | 121 | (5.30)     | -   |
| 1112      | 915       | V   | L0124a | 2,3,6-trimethylheptan-3-ol             | 58046-40-5 | 1.0   | 293.15 | 839.80                | 115 | -                       | -   | -      | -   | 463.00 | 121 | 680.37 | 121 | (5.30)     | -   |
| 1113      | 916       | V   | L0126a | 4-ethyl-2,2-dimethylhexan-3-ol         | 66719-47-9 | 1.0   | 293.15 | 833.90                | 115 | -                       | -   | -      | -   | 460.15 | 121 | 680.37 | 121 | (5.30)     | -   |
| 1114      | 917       | V   | L0127a | 2,2,6-trimethylheptan-3-ol             | 66256-43-7 | 1.0   | 293.15 | 823.60                | 115 | -                       | -   | -      | -   | 463.00 | 121 | 680.37 | 121 | (5.30)     | -   |
| 1115      | 918       | V   | L0128a | 2,4,6-trimethylheptan-4-ol             | 60836-07-9 | 1.0   | 294.15 | 823.00                | 115 | -                       | -   | -      | -   | 455.15 | 121 | 680.37 | 121 | (5.30)     | -   |
| 1116      | 919       | V   | L0129a | 2,2,5-trimethylheptan-4-ol             | 66256-42-6 | 1.0   | 289.15 | 751.30                | 115 | -                       | -   | -      | -   | 455.00 | 121 | 680.37 | 121 | (5.30)     | -   |
| 1117      | 920       | V   | L0130a | 4,6,6-trimethylheptan-2-ol             | 51079-79-9 | 1.0   | 293.15 | 826.50                | 115 | -                       | -   | -      | -   | 466.00 | 121 | 680.37 | 121 | (5.30)     | -   |
| 1118      | 921       | V   | L0132a | 2,5,6-trimethylheptan-2-ol             | 66256-48-2 | 1.0   | 291.15 | 833.00                | 115 | -                       | -   | -      | -   | 466.15 | 121 | 680.37 | 121 | (5.30)     | -   |
| 1119      | 922       | V   | L0134a | 4-propan-2-ylheptan-4-ol               | 51200-82-9 | 1.0   | 298.15 | 841.34                | 115 | -                       | -   | -      | -   | 463.15 | 121 | 680.37 | 121 | (5.30)     | -   |
| 1120      | 923       | V   | L0135a | 3-ethyl-2-methylheptan-3-ol            | 66719-37-7 | 1.0   | 293.15 | 845.50                | 115 | -                       | -   | -      | -   | 466.15 | 121 | 680.37 | 121 | (5.30)     | -   |
| 1121      | 924       | V   | L0137a | 2,3-dimethyloctan-3-ol                 | 19781-10-3 | 1.0   | 298.15 | 824.90                | 115 | -                       | -   | -      | -   | 462.25 | 121 | 680.37 | 121 | (5.30)     | -   |
| 1122      | 925       | V   | L0139a | 4,6-dimethyloctan-4-ol                 | 56065-43-1 | 1.0   | 301.15 | 825.80                | 115 | -                       | -   | -      | -   | 464.00 | 121 | 680.37 | 121 | (5.30)     | -   |
| 1123      | 926       | V   | L0140a | 3,5-dimethyloctan-3-ol                 | 56065-42-0 | 1.0   | 298.15 | 837.00                | 115 | -                       | -   | -      | -   | 466.00 | 121 | 680.37 | 121 | (5.30)     | -   |
| 1124      | 927       | V   | L0141a | 2,4-dimethyloctan-4-ol                 | 33933-79-8 | 1.0   | 293.15 | 823.20                | 115 | -                       | -   | -      | -   | 464.00 | 121 | 680.37 | 121 | (5.30)     | -   |
| 1125      | 928       | V   | L0142a | 3,6-dimethyloctan-3-ol                 | 151-19-9   | 1.0   | 295.15 | 834.70                | 120 | -                       | -   | 205.65 | 120 | 465.15 | 121 | 680.37 | 121 | (5.30)     | -   |
| 1126      | 929       | V   | L0143a | 4,7-dimethyloctan-4-ol                 | 19781-13-6 | 1.0   | 273.15 | 842.10                | 115 | -                       | -   | -      | -   | 465.15 | 121 | 680.37 | 121 | (5.30)     | -   |
| 1127      | 930       | V   | L0144a | 3,7-dimethyloctan-3-ol                 | 78-69-3    | 1.0   | 298.15 | 826.00                | 120 | -                       | -   | -      | -   | 469.15 | 121 | 680.37 | 121 | (5.30)     | -   |
| 1128      | 931       | V   | L0145a | 2,2-dimethyloctan-4-ol                 | 66719-52-6 | 1.0   | 293.15 | 821.20                | 115 | -                       | -   | -      | -   | 463.15 | 121 | 680.37 | 121 | (5.30)     | -   |
| 1129      | 932       | V   | L0146a | 2,4-dimethyloctan-2-ol                 | 18675-20-2 | 1.0   | 293.15 | 825.70                | 115 | -                       | -   | -      | -   | 485.00 | 121 | 680.37 | 121 | (5.30)     | -   |
| 1130      | 933       | V   | L0147a | 2,6-dimethyloctan-2-ol                 | 18479-57-7 | 1.0   | 293.15 | 827.30                | 115 | -                       | -   | -      | -   | 485.00 | 121 | 680.37 | 121 | (5.30)     | -   |
| 1131      | 934       | V   | L0148a | 2,7-dimethyloctan-2-ol                 | 42007-73-8 | 1.0   | 298.15 | 821.10                | 115 | -                       | -   | -      | -   | 485.00 | 121 | 680.37 | 121 | (5.30)     | -   |
| 1132      | 935       | V   | L0149a | 5-ethyl-4-methylheptan-3-ol            | 66731-94-0 | 1.0   | 290.15 | 865.00                | 115 | -                       | -   | -      | -   | 466.00 | 121 | 680.37 | 121 | (5.30)     | -   |
| 1133      | 936       | V   | L0151a | 5-methyl-2-propan-2-ylhexan-1-ol       | 2051-33-4  | 1.0   | 293.15 | 832.20                | 115 | -                       | -   | -      | -   | 486.15 | 121 | 680.37 | 121 | (5.30)     | -   |
| 1134      | 937       | V   | L0152a | 3,6-dimethyloctan-4-ol                 | 66719-31-1 | 0.01  | 358.25 | 786.10                | 121 | -                       | -   | -      | -   | 464.00 | 121 | 680.37 | 121 | (5.30)     | -   |
| 1135      | 938       | V   | L0153a | 2,5-dimethyloctan-4-ol                 | 66719-53-7 | 1.0   | 298.15 | 821.50                | 115 | -                       | -   | -      | -   | 464.00 | 121 | 680.37 | 121 | (5.30)     | -   |
| 1136      | 939       | V   | L0154a | 3,7-dimethyloctan-2-ol                 | 15340-96-2 | 1.0   | 293.15 | 829.10                | 115 | -                       | -   | -      | -   | 485.00 | 121 | 680.37 | 121 | (5.30)     | -   |
| 1137      | 940       | V   | L0155a | 2,7-dimethyloctan-3-ol                 | 66719-55-9 | 1.0   | 293.15 | 815.20                | 115 | -                       | -   | -      | -   | 467.15 | 121 | 680.37 | 121 | (5.30)     | -   |
| 1138      | 941       | V   | L0156a | 4-methyl-2-(2-methylpropyl)pentan-1-ol | 22417-45-4 | 1.0   | 277.15 | 846.00                | 115 | -                       | -   | -      | -   | 477.15 | 121 | 680.37 | 121 | (5.30)     | -   |
| 1139      | 942       | V   | L0157a | 2,6-dimethyloctan-4-ol                 | 66719-54-8 | 0.01  | 361.57 | 759.68                | 121 | -                       | -   | -      | -   | 468.15 | 121 | 680.37 | 121 | (5.30)     | -   |
| 1140      | 943       | V   | L0158a | 2,7-dimethyloctan-4-ol                 | 19781-11-4 | 1.0   | 293.15 | 814.00                | 115 | -                       | -   | -      | -   | 475.15 | 121 | 680.37 | 121 | (5.30)     | -   |
| 1141      | 944       | V   | L0159a | 4-propylheptan-4-ol                    | 2198-72-3  | 1.0   | 298.15 | 828.30                | 115 | -                       | -   | -      | -   | 467.15 | 121 | 680.37 | 121 | (5.30)     | -   |
| 1142      | 945       | V   | L0160a | 4-ethyloctan-4-ol                      | 38395-42-5 | 1.0   | 298.15 | 826.80                | 115 | -                       | -   | -      | -   | 466.00 | 121 | 680.37 | 121 | (5.30)     | -   |
| 1143      | 946       | V   | L0161a | 3-ethyloctan-3-ol                      | 2051-32-3  | 1.0   | 298.15 | 836.10                | 115 | -                       | -   | -      | -   | 472.15 | 121 | 680.37 | 121 | (5.30)     | -   |
| 1144      | 947       | V   | L0162a | 2,2-dimethyloctan-1-ol                 | 2370-14-1  | 1.0   | 293.15 | 830.00                | 115 | -                       | -   | -      | -   | 481.15 | 121 | 680.37 | 121 | 7.86       | 120 |
| 1145      | 948       | V   | L0163a | 5-methylnonan-5-ol                     | 33933-78-7 | 1.0   | 298.15 | 825.38                | 115 | -                       | -   | -      | -   | 475.15 | 121 | 680.37 | 121 | (5.30)     | -   |
| 1146      | 949       | V   | L0164a | 4-methylnonan-4-ol                     | 23418-38-4 | 1.0   | 298.15 | 827.10                | 115 | -                       | -   | -      | -   | 482.00 | 121 | 680.37 | 121 | (5.30)     | -   |
| 1147      | 950       | V   | L0165a | 3-methylnonan-3-ol                     | 21078-72-8 | 1.0   | 298.15 | 826.45                | 115 | -                       | -   | -      | -   | 482.00 | 121 | 680.37 | 121 | (5.30)     | -   |
| 1148      | 951       | V   | L0166a | 2-methylnonan-2-ol                     | 10297-57-1 | 1.0   | 298.15 | 807.80                | 115 | -                       | -   | -      | -   | 487.00 | 121 | 680.37 | 121 | (5.30)     | -   |
| 1149      | 952       | V   | L0167a | 3-propan-2-ylheptan-1-ol               | 38514-15-7 | 1.0   | 303.15 | 834.10                | 115 | -                       | -   | -      | -   | 488.35 | 121 | 680.37 | 121 | (5.30)     | -   |

Table S.1 – Reference experimental data (continued)

| $n_{\text{sim}}$ | $n_{\text{iso}}$ | Set | Code   | Name                            | CAS        | $P$<br>[bar] | $T$<br>[K] | $\rho_{\text{liq}}$<br>[kg·m <sup>-3</sup> ] | Src | $\Delta H_{\text{vap}}$<br>[kJ·mol <sup>-1</sup> ] | Src | $T_m$<br>[K] | Src | $T_b$<br>[K] | Src | $T_c$<br>[K] | Src | $\epsilon$ | Src |
|------------------|------------------|-----|--------|---------------------------------|------------|--------------|------------|----------------------------------------------|-----|----------------------------------------------------|-----|--------------|-----|--------------|-----|--------------|-----|------------|-----|
| 1150             | 953              | V   | L0169a | 5-methylnonan-4-ol              | 66719-44-6 | 1.0          | 300.15     | 826.00                                       | 115 | -                                                  | -   | -            | -   | 482.00       | 121 | 680.37       | 121 | (5.30)     | -   |
| 1151             | 954              | V   | L0170a | 3-methylnonan-2-ol              | 60671-32-1 | 1.0          | 295.15     | 845.00                                       | 115 | -                                                  | -   | -            | -   | 487.00       | 121 | 680.37       | 121 | (5.30)     | -   |
| 1152             | 955              | V   | L0171a | 2-methylnonan-3-ol              | 26533-33-5 | 1.0          | 298.15     | 824.50                                       | 115 | -                                                  | -   | -            | -   | 481.55       | 121 | 680.37       | 121 | (5.30)     | -   |
| 1153             | 956              | V   | L0172a | 4-methyl-2-propylhexan-1-ol     | 66256-62-0 | 1.0          | 293.15     | 828.60                                       | 115 | -                                                  | -   | -            | -   | 481.15       | 121 | 680.37       | 121 | (5.30)     | -   |
| 1154             | 957              | V   | L0173a | 6-ethyloctan-3-ol               | 19781-27-2 | 1.0          | 297.65     | 839.60                                       | 115 | -                                                  | -   | -            | -   | 472.00       | 121 | 680.37       | 121 | (5.30)     | -   |
| 1155             | 958              | V   | L0176a | 2,6-dimethyloctan-1-ol          | 62417-08-7 | 1.0          | 291.15     | 830.00                                       | 115 | -                                                  | -   | -            | -   | 483.00       | 121 | 680.37       | 121 | (5.30)     | -   |
| 1156             | 959              | V   | L0179a | 3,7-dimethyloctan-1-ol          | 106-21-8   | 1.0          | 298.15     | 832.00                                       | 120 | -                                                  | -   | -            | -   | 485.15       | 121 | 680.37       | 121 | (5.30)     | -   |
| 1157             | 959              | V   | L0179b | 3,7-dimethyloctan-1-ol          | 106-21-8   | 1.0          | 356.0      | -                                            | -   | 79.10                                              | 114 | -            | -   | 485.15       | 121 | 680.37       | 121 | (5.30)     | -   |
| 1158             | 960              | V   | L0180a | 2,7-dimethyloctan-1-ol          | 15250-22-3 | 1.0          | 288.15     | 830.30                                       | 115 | -                                                  | -   | -            | -   | -            | -   | -            | -   | (5.30)     | -   |
| 1159             | 961              | V   | L0182a | 6-methylnonan-2-ol              | 66256-60-8 | 1.0          | 293.15     | 833.20                                       | 115 | -                                                  | -   | -            | -   | 487.00       | 121 | 680.37       | 121 | (5.30)     | -   |
| 1160             | 962              | V   | L0184a | 2-methylnonan-4-ol              | 26533-31-3 | 1.0          | 298.15     | 820.00                                       | 115 | -                                                  | -   | -            | -   | 482.00       | 121 | 680.37       | 121 | (5.30)     | -   |
| 1161             | 963              | V   | L0185a | 2-methylnonan-5-ol              | 29843-62-7 | 1.0          | 293.15     | 821.50                                       | 115 | -                                                  | -   | -            | -   | 482.00       | 121 | 680.37       | 121 | (5.30)     | -   |
| 1162             | 964              | V   | L0186a | 8-methylnonan-2-ol              | 14779-92-1 | 0.01         | 376.65     | 760.15                                       | 121 | -                                                  | -   | -            | -   | 487.00       | 121 | 680.37       | 121 | (5.30)     | -   |
| 1163             | 965              | V   | L0187a | 3-ethyloctan-1-ol               | 66719-36-6 | 0.01         | 372.65     | 763.39                                       | 121 | -                                                  | -   | -            | -   | 482.00       | 121 | 680.37       | 121 | (5.30)     | -   |
| 1164             | 966              | V   | L0188a | 2-butylhexan-1-ol               | 2768-15-2  | 1.0          | 289.15     | 836.00                                       | 115 | -                                                  | -   | -            | -   | -            | -   | -            | -   | (5.30)     | -   |
| 1165             | 967              | V   | L0189a | 2-propylheptan-1-ol             | 10042-59-8 | 1.0          | 293.15     | 832.20                                       | 115 | -                                                  | -   | -            | -   | 491.05       | 121 | 680.37       | 121 | (5.30)     | -   |
| 1166             | 968              | V   | L0191a | 5-methylnonan-1-ol              | 2768-16-3  | 1.0          | 297.15     | 831.00                                       | 115 | -                                                  | -   | -            | -   | 487.00       | 121 | 680.37       | 121 | (5.30)     | -   |
| 1167             | 969              | V   | L0192a | 4-methylnonan-1-ol              | 1489-47-0  | 1.0          | 300.15     | 826.00                                       | 115 | -                                                  | -   | -            | -   | 489.15       | 121 | 680.37       | 121 | (5.30)     | -   |
| 1168             | 970              | V   | L0193a | 3-methylnonan-1-ol              | 22663-64-5 | 1.0          | 296.15     | 837.00                                       | 115 | -                                                  | -   | -            | -   | 487.00       | 121 | 680.37       | 121 | (5.30)     | -   |
| 1169             | 971              | V   | L0194a | 7-methylnonan-1-ol              | 33234-93-4 | 1.0          | 298.15     | 828.20                                       | 115 | -                                                  | -   | -            | -   | 487.00       | 121 | 680.37       | 121 | (5.30)     | -   |
| 1170             | 972              | V   | L0195a | 2-methylnonan-1-ol              | 40589-14-8 | 1.0          | 288.15     | 833.65                                       | 115 | -                                                  | -   | -            | -   | 495.15       | 121 | 680.37       | 121 | (5.30)     | -   |
| 1171             | 973              | V   | L0196a | decan-5-ol                      | 5205-34-5  | 1.0          | 298.15     | 820.60                                       | 115 | -                                                  | -   | 281.85       | 120 | 474.15       | 121 | 680.37       | 121 | 3.24       | 120 |
| 1172             | 974              | V   | L0197a | decan-4-ol                      | 2051-31-2  | 1.0          | 293.15     | 825.00                                       | 115 | -                                                  | -   | 262.15       | 120 | 483.15       | 121 | 680.37       | 121 | 3.42       | 120 |
| 1173             | 975              | V   | L0198a | decan-3-ol                      | 1565-81-7  | 1.0          | 298.15     | 822.90                                       | 115 | -                                                  | -   | 265.65       | 120 | 483.00       | 121 | 680.37       | 121 | 4.05       | 120 |
| 1174             | 976              | V   | L0199a | 8-methylnonan-1-ol              | 25339-17-7 | 0.01         | 381.45     | 771.13                                       | 121 | -                                                  | -   | -            | -   | 493.00       | 121 | 680.37       | 121 | (5.30)     | -   |
| 1175             | 977              | V   | L7201a | 2,3-dimethylpentane-2,3-diol    | 6931-70-0  | 1.0          | 293.15     | 961.30                                       | 115 | -                                                  | -   | -            | -   | 525.85       | 121 | 799.33       | 121 | (26.35)    | -   |
| 1176             | 978              | V   | L7202a | 2,4-dimethylpentane-2,4-diol    | 24892-49-7 | 1.0          | 293.15     | 920.60                                       | 115 | -                                                  | -   | -            | -   | 470.00       | 121 | 799.33       | 121 | (26.35)    | -   |
| 1177             | 979              | V   | L7204a | 3-ethylpentane-2,3-diol         | -          | 1.0          | 298.15     | 961.20                                       | 115 | -                                                  | -   | -            | -   | -            | -   | -            | -   | (26.35)    | -   |
| 1178             | 980              | V   | L7206a | 3,4-dimethylpentane-1,4-diol    | 63521-36-8 | 1.0          | 293.15     | 952.80                                       | 115 | -                                                  | -   | -            | -   | 517.03       | 121 | 799.33       | 121 | (26.35)    | -   |
| 1179             | 981              | V   | L7207a | 4-methylhexane-2,4-diol         | 38836-25-8 | 1.0          | 293.15     | 929.60                                       | 115 | -                                                  | -   | -            | -   | 517.03       | 121 | 799.33       | 121 | (26.35)    | -   |
| 1180             | 982              | V   | L7208a | 2-methylhexane-2,4-diol         | 66225-35-2 | 1.0          | 291.15     | 932.10                                       | 115 | -                                                  | -   | -            | -   | 517.03       | 121 | 799.33       | 121 | (26.35)    | -   |
| 1181             | 983              | V   | L7212a | 2,2-diethylpropane-1,3-diol     | 115-76-4   | 1.0          | 334.45     | 949.00                                       | 115 | -                                                  | -   | 334.45       | 120 | 507.15       | 121 | 799.33       | 121 | (26.35)    | -   |
| 1182             | 984              | V   | L7217a | 5-methylhexane-1,5-diol         | 1462-11-9  | 1.0          | 295.15     | 967.00                                       | 115 | -                                                  | -   | -            | -   | 494.25       | 121 | 799.33       | 121 | (26.35)    | -   |
| 1183             | 985              | V   | L7220a | 2-propan-2-ylbutane-1,4-diol    | 39497-66-0 | 1.0          | 293.15     | 967.20                                       | 115 | -                                                  | -   | -            | -   | 508.21       | 121 | 799.33       | 121 | (26.35)    | -   |
| 1184             | 986              | V   | L7221a | heptane-3,4-diol                | 62593-33-3 | 1.0          | 295.15     | 943.00                                       | 115 | -                                                  | -   | -            | -   | -            | -   | -            | -   | (26.35)    | -   |
| 1185             | 987              | V   | L7224a | heptane-2,4-diol                | 20748-86-1 | 1.0          | 298.15     | 926.00                                       | 115 | -                                                  | -   | -            | -   | 508.21       | 121 | 799.33       | 121 | (26.35)    | -   |
| 1186             | 988              | V   | L7226a | 2-propylbutane-1,4-diol         | 62946-68-3 | 1.0          | 293.15     | 962.50                                       | 115 | -                                                  | -   | -            | -   | 485.43       | 121 | 799.33       | 121 | (26.35)    | -   |
| 1187             | 989              | V   | L7227a | 2-ethylpentane-1,5-diol         | 14189-13-0 | 1.0          | 293.15     | 967.90                                       | 115 | -                                                  | -   | -            | -   | 485.43       | 121 | 799.33       | 121 | (26.35)    | -   |
| 1188             | 990              | V   | L7228a | 2-butylpropane-1,3-diol         | 2612-26-2  | 1.0          | 298.15     | 946.10                                       | 115 | -                                                  | -   | -            | -   | -            | -   | -            | -   | (26.35)    | -   |
| 1189             | 991              | V   | L7230a | heptane-1,4-diol                | 40646-07-9 | 1.0          | 298.15     | 950.40                                       | 115 | -                                                  | -   | -            | -   | 515.15       | 121 | 799.33       | 121 | (26.35)    | -   |
| 1190             | 992              | V   | L7232a | heptane-1,5-diol                | 60096-09-5 | 1.0          | 293.15     | 970.50                                       | 115 | -                                                  | -   | -            | -   | 489.79       | 121 | 799.33       | 121 | (26.35)    | -   |
| 1191             | 993              | V   | L7234a | heptane-1,6-diol                | 13175-27-4 | 1.0          | 298.15     | 962.00                                       | 115 | -                                                  | -   | -            | -   | 485.43       | 121 | 799.33       | 121 | (26.35)    | -   |
| 1192             | 994              | V   | L7235a | heptane-1,7-diol                | 629-30-1   | 1.0          | 298.15     | 952.25                                       | 115 | 96.50                                              | 114 | 295.05       | 120 | 535.15       | 121 | 799.33       | 121 | (26.35)    | -   |
| 1193             | 995              | V   | L8202a | 2,4-dimethylhexane-2,4-diol     | 29649-22-7 | 1.0          | 293.35     | 922.90                                       | 115 | -                                                  | -   | -            | -   | -            | -   | -            | -   | (18.73)    | -   |
| 1194             | 996              | V   | L8203a | 2,5-dimethylhexane-2,5-diol     | 110-03-2   | 0.01         | 362.0      | 852.16                                       | 121 | -                                                  | -   | 364.15       | 120 | 487.15       | 121 | 819.27       | 121 | (18.73)    | -   |
| 1195             | 997              | V   | L8204a | 2,2,4-trimethylpentane-1,3-diol | 144-19-4   | 0.01         | 391.21     | 865.06                                       | 121 | -                                                  | -   | 328.35       | 120 | 508.15       | 121 | 819.27       | 121 | (18.73)    | -   |
| 1196             | 997              | V   | L8204b | 2,2,4-trimethylpentane-1,3-diol | 144-19-4   | 1.0          | 428.0      | -                                            | -   | 58.50                                              | 114 | 328.35       | 120 | 508.15       | 121 | 819.27       | 121 | (18.73)    | -   |
| 1197             | 998              | V   | L8205a | 3,5-dimethylhexane-2,3-diol     | 99799-29-8 | 1.0          | 298.15     | 928.50                                       | 115 | -                                                  | -   | -            | -   | -            | -   | -            | -   | (18.73)    | -   |



Table S.1 – Reference experimental data (continued)

| $n_{sim}$ | $n_{iso}$ | Set | Code   | Name                               | CAS         | $P$<br>[bar] | $T$<br>[K] | $\rho_{liq}$<br>[kg·m <sup>-3</sup> ] | Src | $\Delta H_{vap}$<br>[kJ·mol <sup>-1</sup> ] | Src | $T_m$<br>[K] | Src | $T_b$<br>[K] | Src | $T_c$<br>[K] | Src | $\epsilon$ | Src |
|-----------|-----------|-----|--------|------------------------------------|-------------|--------------|------------|---------------------------------------|-----|---------------------------------------------|-----|--------------|-----|--------------|-----|--------------|-----|------------|-----|
| 1198      | 999       | V   | L8206a | 2,5-dimethylhexane-2,4-diol        | 3899-89-6   | 1.0          | 293.15     | 917.20                                | 115 | -                                           | -   | -            | -   | -            | -   | -            | -   | (18.73)    | -   |
| 1199      | 1000      | V   | L8207a | 2-methylheptane-2,3-diol           | 1068-81-1   | 1.0          | 298.15     | 929.00                                | 115 | -                                           | -   | -            | -   | -            | -   | -            | -   | (18.73)    | -   |
| 1200      | 1001      | V   | L8208a | 3-methylheptane-2,4-diol           | 6964-04-1   | 0.01         | 369.56     | 875.70                                | 121 | -                                           | -   | -            | -   | 478.13       | 121 | 819.27       | 121 | (18.73)    | -   |
| 1201      | 1002      | V   | L8209a | 2-butyl-2-methylpropane-1,3-diol   | 3121-83-3   | 0.01         | 415.17     | 844.98                                | 121 | -                                           | -   | -            | -   | 535.15       | 121 | 819.27       | 121 | (18.73)    | -   |
| 1202      | 1003      | V   | L8210a | 4-ethylhexane-1,4-diol             | 1113-00-4   | 1.0          | 292.15     | 970.40                                | 115 | -                                           | -   | -            | -   | -            | -   | -            | -   | (18.73)    | -   |
| 1203      | 1004      | V   | L8211a | 6-methylheptane-1,6-diol           | 5392-57-4   | 1.0          | 298.15     | 959.00                                | 115 | -                                           | -   | -            | -   | -            | -   | -            | -   | (18.73)    | -   |
| 1204      | 1005      | V   | L8212a | 2-ethylhexane-1,3-diol             | 94-96-2     | 1.0          | 295.15     | 932.50                                | 120 | 79.50                                       | 114 | 233.15       | 120 | 517.15       | 121 | 819.27       | 121 | 18.73      | 120 |
| 1205      | 1006      | V   | L8213a | octane-2,4-diol                    | 90162-24-6  | 1.0          | 298.15     | 918.00                                | 115 | -                                           | -   | -            | -   | 478.13       | 121 | 819.27       | 121 | (18.73)    | -   |
| 1206      | 1007      | V   | L8215a | octane-1,5-diol                    | 2736-67-6   | 1.0          | 298.15     | 949.00                                | 115 | -                                           | -   | -            | -   | -            | -   | -            | -   | (18.73)    | -   |
| 1207      | 1008      | V   | L8217a | octane-1,6-diol                    | 4066-76-6   | 1.0          | 298.15     | 954.00                                | 115 | -                                           | -   | -            | -   | -            | -   | -            | -   | (18.73)    | -   |
| 1208      | 1009      | V   | L8219a | octane-1,7-diol                    | 13175-32-1  | 1.0          | 298.15     | 943.00                                | 115 | -                                           | -   | -            | -   | -            | -   | -            | -   | (18.73)    | -   |
| 1209      | 1010      | V   | L8220b | octane-1,8-diol                    | 629-41-4    | 1.0          | 356.0      | -                                     | -   | 101.00                                      | 114 | 332.75       | 120 | 544.15       | 121 | 819.27       | 121 | (18.73)    | -   |
| 1210      | 1011      | V   | L9201a | 2,4,5-trimethylhexane-2,4-diol     | 36587-81-2  | 1.0          | 301.35     | 920.70                                | 115 | -                                           | -   | -            | -   | -            | -   | -            | -   | (26.35)    | -   |
| 1211      | 1012      | V   | L9202a | 2,4-dimethylheptane-2,4-diol       | 59194-83-1  | 1.0          | 290.35     | 913.80                                | 115 | -                                           | -   | -            | -   | -            | -   | -            | -   | (26.35)    | -   |
| 1212      | 1013      | V   | L9203a | 2,6-dimethylheptane-2,4-diol       | 73264-93-4  | 1.0          | 291.15     | 902.00                                | 115 | -                                           | -   | -            | -   | -            | -   | -            | -   | (26.35)    | -   |
| 1213      | 1014      | V   | L9204a | 2,2,4-trimethylhexane-1,6-diol     | 3089-24-5   | 1.0          | 434.0      | -                                     | -   | 68.00                                       | 114 | -            | -   | -            | -   | -            | -   | (26.35)    | -   |
| 1214      | 1015      | V   | L9205a | 2-butyl-2-ethylpropane-1,3-diol    | 115-84-4    | 1.0          | 323.15     | 929.00                                | 115 | -                                           | -   | 316.15       | 120 | 535.15       | 121 | 837.92       | 121 | (26.35)    | -   |
| 1215      | 1015      | V   | L9205b | 2-butyl-2-ethylpropane-1,3-diol    | 115-84-4    | 1.0          | 460.0      | -                                     | -   | 67.20                                       | 114 | 316.15       | 120 | 535.15       | 121 | 837.92       | 121 | (26.35)    | -   |
| 1216      | 1016      | V   | L9206a | 5-ethylheptane-1,5-diol            | 57740-06-4  | 1.0          | 291.15     | 958.00                                | 115 | -                                           | -   | -            | -   | -            | -   | -            | -   | (26.35)    | -   |
| 1217      | 1017      | V   | L9207a | 2-(2-methylpropyl)pentane-1,5-diol | 57740-10-0  | 1.0          | 293.15     | 941.60                                | 115 | -                                           | -   | -            | -   | -            | -   | -            | -   | (26.35)    | -   |
| 1218      | 1018      | V   | L9208a | nonane-1,5-diol                    | 13686-96-9  | 1.0          | 293.15     | 937.00                                | 115 | -                                           | -   | -            | -   | -            | -   | -            | -   | (26.35)    | -   |
| 1219      | 1019      | V   | L9209a | nonane-1,4-diol                    | 2430-73-1   | 1.0          | 293.15     | 929.50                                | 115 | -                                           | -   | -            | -   | 571.15       | 121 | 837.92       | 121 | (26.35)    | -   |
| 1220      | 1020      | V   | L9211a | nonane-1,7-diol                    | 4469-84-5   | 1.0          | 298.15     | 944.00                                | 115 | -                                           | -   | -            | -   | -            | -   | -            | -   | (26.35)    | -   |
| 1221      | 1021      | V   | L9213b | nonane-1,9-diol                    | 3937-56-2   | 1.0          | 323.0      | -                                     | -   | 110.00                                      | 114 | 319.55       | 120 | 558.15       | 121 | 837.92       | 121 | (26.35)    | -   |
| 1222      | 1022      | V   | L0201a | 2,4,6-trimethylheptane-2,4-diol    | 33070-42-7  | 1.0          | 288.15     | 910.24                                | 115 | -                                           | -   | -            | -   | -            | -   | -            | -   | (26.35)    | -   |
| 1223      | 1023      | V   | L0202a | 3,4-diethylhexane-3,4-diol         | 6931-71-1   | 1.0          | 298.15     | 943.50                                | 115 | -                                           | -   | -            | -   | 503.15       | 121 | 855.45       | 121 | (26.35)    | -   |
| 1224      | 1023      | V   | L0202b | 3,4-diethylhexane-3,4-diol         | 6931-71-1   | 0.01         | 389.57     | -                                     | -   | 54.99                                       | 121 | -            | -   | 503.15       | 121 | 855.45       | 121 | (26.35)    | -   |
| 1225      | 1024      | V   | L0203a | 3,7-dimethyloctane-3,5-diol        | 56548-45-9  | 1.0          | 285.15     | 911.80                                | 115 | -                                           | -   | -            | -   | -            | -   | -            | -   | (26.35)    | -   |
| 1226      | 1025      | V   | L0204a | 2-butyl-2-ethylbutane-1,3-diol     | 2050-83-1   | 1.0          | 353.0      | -                                     | -   | 63.40                                       | 114 | -            | -   | -            | -   | -            | -   | (26.35)    | -   |
| 1227      | 1026      | V   | L0205a | 3,7-dimethyloctane-1,3-diol        | 102880-60-4 | 1.0          | 293.15     | 916.50                                | 115 | -                                           | -   | -            | -   | -            | -   | -            | -   | (26.35)    | -   |
| 1228      | 1027      | V   | L0206a | 3,7-dimethyloctane-1,7-diol        | 107-74-4    | 1.0          | 293.15     | 926.00                                | 115 | -                                           | -   | -            | -   | 538.15       | 121 | 855.45       | 121 | (26.35)    | -   |
| 1229      | 1028      | V   | L0207a | 3,7-dimethyloctane-1,6-diol        | 53067-10-0  | 1.0          | 293.15     | 948.10                                | 115 | -                                           | -   | -            | -   | -            | -   | -            | -   | (26.35)    | -   |
| 1230      | 1029      | V   | L0208a | 2,3-dipropylbutane-1,4-diol        | 74854-17-4  | 1.0          | 293.15     | 936.20                                | 115 | -                                           | -   | -            | -   | -            | -   | -            | -   | (26.35)    | -   |
| 1231      | 1030      | V   | L0209a | 2-propylheptane-1,3-diol           | 6628-65-5   | 1.0          | 301.15     | 915.50                                | 115 | -                                           | -   | -            | -   | -            | -   | -            | -   | (26.35)    | -   |
| 1232      | 1031      | V   | L0210a | 2,5-diethylhexane-1,6-diol         | 91241-30-4  | 1.0          | 298.15     | 930.70                                | 115 | -                                           | -   | -            | -   | -            | -   | -            | -   | (26.35)    | -   |
| 1233      | 1032      | V   | L0213a | decane-1,10-diol                   | 112-47-0    | 1.0          | 353.15     | 883.00                                | 115 | -                                           | -   | 345.55       | 120 | 572.15       | 121 | 855.45       | 121 | (26.35)    | -   |
| 1234      | 1032      | V   | L0213b | decane-1,10-diol                   | 112-47-0    | 1.0          | 364.0      | -                                     | -   | 112.40                                      | 114 | 345.55       | 120 | 572.15       | 121 | 855.45       | 121 | (26.35)    | -   |
| 1235      | 1033      | V   | L7302a | heptane-1,4,7-triol                | 3920-53-4   | 1.0          | 291.0      | 1075.00                               | 115 | -                                           | -   | -            | -   | 416.90       | 121 | -            | -   | (39.02)    | -   |
| 1236      | 1034      | V   | C7202a | 2,2-dimethylpentanoic acid         | 1185-39-3   | 1.0          | 293.15     | 885.60                                | 117 | -                                           | -   | -            | -   | -            | -   | 676.34       | 121 | (3.04)     | -   |
| 1237      | 1035      | V   | C7203a | 3,3-dimethylpentanoic acid         | 3177-74-0   | 1.0          | 298.15     | 934.80                                | 117 | -                                           | -   | -            | -   | -            | -   | -            | -   | (3.04)     | -   |
| 1238      | 1036      | V   | C7205a | 2,4-dimethylpentanoic acid         | 5868-33-7   | 1.0          | 298.15     | 910.00                                | 117 | -                                           | -   | -            | -   | -            | -   | -            | -   | (3.04)     | -   |
| 1239      | 1037      | V   | C7206a | 3,4-dimethylpentanoic acid         | 3302-06-5   | 1.0          | 298.15     | 923.90                                | 117 | -                                           | -   | -            | -   | -            | -   | -            | -   | (3.04)     | -   |
| 1240      | 1038      | V   | C7207a | 2-ethylpentanoic acid              | 20225-24-5  | 1.0          | 298.15     | 909.80                                | 117 | -                                           | -   | -            | -   | -            | -   | 676.34       | 121 | (3.04)     | -   |
| 1241      | 1039      | V   | C7208a | 2-methylhexanoic acid              | 4536-23-6   | 1.0          | 298.15     | 909.00                                | 117 | -                                           | -   | -            | -   | 482.65       | 121 | -            | -   | (3.04)     | -   |
| 1242      | 1040      | V   | C7210a | 3-methylhexanoic acid              | 3780-58-3   | 1.0          | 293.15     | 918.70                                | 117 | -                                           | -   | -            | -   | 486.15       | 121 | 676.34       | 121 | (3.04)     | -   |
| 1243      | 1041      | V   | C7211a | 5-methylhexanoic acid              | 628-46-6    | 1.0          | 293.15     | 916.30                                | 117 | -                                           | -   | -            | -   | 489.15       | 121 | 676.34       | 121 | (3.04)     | -   |
| 1244      | 1042      | V   | C7212a | heptanoic acid                     | 111-14-8    | 1.0          | 298.15     | 913.50                                | 118 | 72.90                                       | 114 | 265.98       | 120 | 496.15       | 121 | 677.30       | 121 | 3.04       | 120 |
| 1245      | 1043      | V   | C8201a | 3,4,4-trimethylpentanoic acid      | 75177-71-8  | 1.0          | 298.15     | 919.90                                | 117 | -                                           | -   | -            | -   | -            | -   | -            | -   | (2.75)     | -   |

Table S.1 – Reference experimental data (continued)

| $n_{sim}$ | $n_{iso}$ | Set | Code   | Name                                | CAS        | $P$<br>[bar] | $T$<br>[K] | $\rho_{liq}$<br>[kg·m <sup>-3</sup> ] | Src | $\Delta H_{vap}$<br>[kJ·mol <sup>-1</sup> ] | Src | $T_m$<br>[K] | Src | $T_b$<br>[K] | Src | $T_c$<br>[K] | Src | $\epsilon$ | Src |
|-----------|-----------|-----|--------|-------------------------------------|------------|--------------|------------|---------------------------------------|-----|---------------------------------------------|-----|--------------|-----|--------------|-----|--------------|-----|------------|-----|
| 1246      | 1044      | V   | C8202a | 2,3,4-trimethylpentanoic acid       | 90435-18-0 | 1.0          | 293.15     | 929.00                                | 117 | -                                           | -   | -            | -   | -            | -   | -            | -   | (2.75)     | -   |
| 1247      | 1045      | V   | C8203a | 2,2-dimethylhexanoic acid           | 813-72-9   | 0.01         | 374.97     | 849.15                                | 121 | -                                           | -   | -            | -   | -            | -   | 696.49       | 121 | (2.75)     | -   |
| 1248      | 1046      | V   | C8204a | 3,3-dimethylhexanoic acid           | 90808-83-6 | 1.0          | 298.15     | 900.90                                | 117 | -                                           | -   | -            | -   | -            | -   | -            | -   | (2.75)     | -   |
| 1249      | 1047      | V   | C8206a | 3,5-dimethylhexanoic acid           | 60308-87-4 | 1.0          | 298.15     | 902.00                                | 117 | -                                           | -   | -            | -   | -            | -   | -            | -   | (2.75)     | -   |
| 1250      | 1048      | V   | C8207a | 2-propylpentanoic acid              | 99-66-1    | 1.0          | 298.15     | 904.00                                | 120 | 74.80                                       | 114 | -            | -   | 494.15       | 121 | 696.49       | 121 | (2.75)     | -   |
| 1251      | 1049      | V   | C8208a | 2-ethylhexanoic acid                | 149-57-5   | 1.0          | 298.15     | 903.03                                | 117 | 75.60                                       | 114 | -            | -   | 501.15       | 121 | 673.20       | 121 | 2.64       | 120 |
| 1252      | 1050      | V   | C8212a | 5-methylheptanoic acid              | 1070-68-4  | 1.0          | 293.15     | 910.50                                | 117 | -                                           | -   | -            | -   | -            | -   | -            | -   | (2.75)     | -   |
| 1253      | 1051      | V   | C8214a | octanoic acid                       | 124-07-2   | 1.01         | 298.15     | 906.02                                | 118 | 81.20                                       | 114 | 289.66       | 120 | 513.05       | 121 | 694.26       | 121 | 2.85       | 120 |
| 1254      | 1052      | V   | C9201a | 3,5,5-trimethylhexanoic acid        | 3302-10-1  | 0.01         | 385.37     | 839.70                                | 121 | -                                           | -   | -            | -   | 456.91       | 121 | 715.31       | 121 | (2.28)     | -   |
| 1255      | 1053      | V   | C9202a | 3-ethyl-3-methylhexanoic acid       | 50902-82-4 | 0.01         | 385.37     | 849.66                                | 121 | -                                           | -   | -            | -   | 456.91       | 121 | 715.31       | 121 | (2.28)     | -   |
| 1256      | 1054      | V   | C9203a | 3,3-dimethylheptanoic acid          | 67061-30-7 | 1.0          | 298.15     | 910.20                                | 117 | -                                           | -   | -            | -   | -            | -   | -            | -   | (2.28)     | -   |
| 1257      | 1055      | V   | C9207a | 2-ethylheptanoic acid               | 3274-29-1  | 1.0          | 298.15     | 893.50                                | 117 | -                                           | -   | -            | -   | 456.91       | 121 | 715.31       | 121 | 1.98       | 120 |
| 1258      | 1055      | V   | C9207b | 2-ethylheptanoic acid               | 3274-29-1  | 1.0          | 401.0      | -                                     | -   | 63.40                                       | 114 | -            | -   | 456.91       | 121 | 715.31       | 121 | 1.98       | 120 |
| 1259      | 1056      | V   | C9208a | 2-methyloctanoic acid               | 3004-93-1  | 1.0          | 277.15     | 909.70                                | 117 | -                                           | -   | -            | -   | 456.91       | 121 | 715.31       | 121 | 2.39       | 120 |
| 1260      | 1057      | V   | C9210a | 3-methyloctanoic acid               | 6061-10-5  | 1.0          | 296.15     | 899.00                                | 117 | -                                           | -   | -            | -   | 456.91       | 121 | 715.31       | 121 | (2.28)     | -   |
| 1261      | 1058      | V   | C9211a | 4-methyloctanoic acid               | 54947-74-9 | 0.01         | 395.77     | 830.88                                | 121 | -                                           | -   | -            | -   | -            | -   | 715.31       | 121 | (2.28)     | -   |
| 1262      | 1059      | V   | C9214a | nonanoic acid                       | 112-05-0   | 1.0          | 298.15     | 901.63                                | 117 | -                                           | -   | 285.53       | 120 | 528.75       | 121 | 710.70       | 121 | 2.475      | 120 |
| 1263      | 1059      | V   | C9214b | nonanoic acid                       | 112-05-0   | 1.0          | 304.0      | -                                     | -   | 85.30                                       | 114 | 285.53       | 120 | 528.75       | 121 | 710.70       | 121 | 2.475      | 120 |
| 1264      | 1060      | V   | C0201a | 2,2-dimethyloctanoic acid           | 29662-90-6 | 1.0          | 293.15     | 902.20                                | 117 | -                                           | -   | -            | -   | 473.73       | 121 | 733.00       | 121 | 2.8        | 120 |
| 1265      | 1061      | V   | C0202a | 3,3-dimethyloctanoic acid           | 14352-59-1 | 1.0          | 298.15     | 912.90                                | 117 | -                                           | -   | -            | -   | -            | -   | -            | -   | (2.80)     | -   |
| 1266      | 1062      | V   | C0203a | 3,7-dimethyloctanoic acid           | 5698-27-1  | 1.0          | 291.15     | 897.00                                | 117 | -                                           | -   | -            | -   | -            | -   | -            | -   | (2.80)     | -   |
| 1267      | 1063      | V   | C0204a | 2-butylhexanoic acid                | 3115-28-4  | 1.0          | 291.55     | 897.80                                | 117 | -                                           | -   | -            | -   | -            | -   | -            | -   | (2.80)     | -   |
| 1268      | 1064      | V   | C0206a | 2-ethyloctanoic acid                | 25234-25-7 | 1.0          | 293.15     | 848.10                                | 117 | -                                           | -   | -            | -   | -            | -   | 733.00       | 121 | (2.80)     | -   |
| 1269      | 1065      | V   | C0207a | 2-methylnonanoic acid               | 24323-21-5 | 1.0          | 298.15     | 893.00                                | 117 | -                                           | -   | -            | -   | -            | -   | 733.00       | 121 | (2.80)     | -   |
| 1270      | 1066      | V   | C0208a | 3-methylnonanoic acid               | 35205-79-9 | 1.0          | 293.15     | 898.30                                | 117 | -                                           | -   | -            | -   | 473.73       | 121 | 733.00       | 121 | (2.80)     | -   |
| 1271      | 1067      | V   | C0209a | 4-ethyloctanoic acid                | 16493-80-4 | 1.0          | 293.15     | 898.60                                | 117 | -                                           | -   | -            | -   | -            | -   | 733.00       | 121 | (2.80)     | -   |
| 1272      | 1068      | V   | C0212a | decanoic acid                       | 334-48-5   | 1.0          | 313.15     | 881.70                                | 117 | 88.60                                       | 114 | 304.54       | 120 | 543.15       | 121 | 722.10       | 121 | (2.80)     | -   |
| 1273      | 1069      | V   | C7403a | 3,3-dimethylpentanedioic acid       | 4839-46-7  | 0.01         | 479.85     | 1198.77                               | 121 | -                                           | -   | 376.65       | 120 | 464.16       | 121 | 809.00       | 121 | (3.0)      | -   |
| 1274      | 1070      | V   | C7409a | heptanedioic acid                   | 111-16-0   | 0.01         | 486.25     | 1100.09                               | 121 | -                                           | -   | 377.55       | 120 | 464.16       | 121 | 805.00       | 121 | (3.0)      | -   |
| 1275      | 1070      | V   | C7409b | heptanedioic acid                   | 111-16-0   | 1.0          | 451.0      | -                                     | -   | 88.60                                       | 114 | 377.55       | 120 | 464.16       | 121 | 805.00       | 121 | (3.0)      | -   |
| 1276      | 1071      | V   | C8401a | 2,2,3,3-tetramethylbutanedioic acid | 630-51-3   | 0.01         | 480.65     | 1089.79                               | 121 | -                                           | -   | -            | -   | 495.09       | 121 | 809.00       | 121 | (3.0)      | -   |
| 1277      | 1072      | V   | C8403b | octanedioic acid                    | 505-48-6   | 1.0          | 460.0      | -                                     | -   | 91.40                                       | 114 | 415.45       | 120 | 495.09       | 121 | 809.00       | 121 | (3.0)      | -   |
| 1278      | 1073      | V   | C9401a | nonanedioic acid                    | 123-99-9   | 0.01         | 501.5      | 999.70                                | 121 | -                                           | -   | 379.65       | 120 | 633.36       | 121 | 811.00       | 121 | (3.0)      | -   |
| 1279      | 1073      | V   | C9401b | nonanedioic acid                    | 123-99-9   | 1.0          | 466.0      | -                                     | -   | 89.30                                       | 114 | 379.65       | 120 | 633.36       | 121 | 811.00       | 121 | (3.0)      | -   |
| 1280      | 1074      | V   | C0403a | decanedioic acid                    | 111-20-6   | 0.01         | 507.79     | 1026.10                               | 121 | -                                           | -   | 404.15       | 120 | 642.09       | 121 | 815.00       | 121 | (3.0)      | -   |
| 1281      | 1074      | V   | C0403b | decanedioic acid                    | 111-20-6   | 1.0          | 471.0      | -                                     | -   | 85.90                                       | 114 | 404.15       | 120 | 642.09       | 121 | 815.00       | 121 | (3.0)      | -   |
| 1282      | 1075      | V   | M7101a | 2,2-dimethylpentan-3-amine          | 73153-81-8 | 1.0          | 298.15     | 761.50                                | 117 | -                                           | -   | -            | -   | -            | -   | -            | -   | (3.81)     | -   |
| 1283      | 1076      | V   | M7102a | 2,4-dimethylpentan-2-amine          | 64379-30-2 | 0.01         | 298.15     | 768.20                                | 121 | -                                           | -   | -            | -   | 395.15       | 121 | 617.70       | 121 | (3.81)     | -   |
| 1284      | 1077      | V   | M7103a | 2,4-dimethylpentan-3-amine          | 4083-57-2  | 1.0          | 293.15     | 788.20                                | 117 | -                                           | -   | -            | -   | -            | -   | -            | -   | (3.81)     | -   |
| 1285      | 1078      | V   | M7104a | 4-methylhexan-2-amine               | 105-41-9   | 0.01         | 306.57     | 755.49                                | 121 | -                                           | -   | -            | -   | 405.65       | 121 | 617.70       | 121 | (3.81)     | -   |
| 1286      | 1079      | V   | M7106a | heptan-4-amine                      | 16751-59-0 | 0.01         | 312.17     | 752.73                                | 121 | -                                           | -   | -            | -   | 412.65       | 121 | 617.70       | 121 | (3.81)     | -   |
| 1287      | 1080      | V   | M7107a | heptan-3-amine                      | 28292-42-4 | 0.01         | 313.37     | -                                     | -   | 41.78                                       | 121 | -            | -   | 414.15       | 121 | 617.70       | 121 | (3.81)     | -   |
| 1288      | 1081      | V   | M7108a | 3-methylhexan-1-amine               | 65530-93-0 | 0.01         | 319.77     | 756.11                                | 121 | -                                           | -   | -            | -   | 422.15       | 121 | 617.70       | 121 | (3.81)     | -   |
| 1289      | 1082      | V   | M7109a | 4-methylhexan-1-amine               | 34263-68-8 | 0.01         | 322.97     | 757.35                                | 121 | -                                           | -   | -            | -   | 426.15       | 121 | 617.70       | 121 | (3.81)     | -   |
| 1290      | 1083      | V   | M7110a | heptan-2-amine                      | 123-82-0   | 1.0          | 293.15     | 762.90                                | 117 | -                                           | -   | -            | -   | 415.15       | 121 | 617.70       | 121 | (3.81)     | -   |
| 1291      | 1084      | V   | M7111a | heptan-1-amine                      | 111-68-2   | 1.0          | 298.15     | 771.31                                | 117 | 49.90                                       | 114 | 250.15       | 120 | 430.05       | 121 | 617.70       | 121 | 3.81       | 120 |
| 1292      | 1085      | V   | M8101a | 2,4,4-trimethylpentan-2-amine       | 117-45-9   | 0.01         | 312.57     | 794.37                                | 121 | 41.04                                       | 121 | -            | -   | 413.15       | 121 | 643.92       | 121 | (3.58)     | -   |
| 1293      | 1086      | V   | M8102a | 6-methylheptan-2-amine              | 543-82-8   | 0.002        | 298.15     | 767.00                                | 121 | 44.49                                       | 121 | -            | -   | 428.15       | 121 | 643.92       | 121 | (3.58)     | -   |

Table S.1 – Reference experimental data (continued)

| $n_{sim}$ | $n_{iso}$ | Set | Code   | Name                                      | CAS         | $P$<br>[bar] | $T$<br>[K] | $\rho_{liq}$<br>[kg·m <sup>-3</sup> ] | Src | $\Delta H_{vap}$<br>[kJ·mol <sup>-1</sup> ] | Src | $T_m$<br>[K] | Src | $T_b$<br>[K] | Src | $T_c$<br>[K] | Src | $\epsilon$ | Src |
|-----------|-----------|-----|--------|-------------------------------------------|-------------|--------------|------------|---------------------------------------|-----|---------------------------------------------|-----|--------------|-----|--------------|-----|--------------|-----|------------|-----|
| 1294      | 1087      | V   | M8103a | 2-ethylhexan-1-amine                      | 104-75-6    | 0.01         | 335.93     | -                                     | -   | 45.26                                       | 121 | -            | -   | 442.35       | 121 | 643.92       | 121 | (3.58)     | -   |
| 1295      | 1088      | V   | M8104a | octan-2-amine                             | 693-16-3    | 1.0          | 293.15     | 772.00                                | 118 | -                                           | -   | -            | -   | 438.15       | 121 | 643.92       | 121 | (3.58)     | -   |
| 1296      | 1088      | V   | M8104b | octan-2-amine                             | 693-16-3    | 0.01         | 332.57     | -                                     | -   | 44.66                                       | 121 | -            | -   | 438.15       | 121 | 643.92       | 121 | (3.58)     | -   |
| 1297      | 1089      | V   | M8105a | octan-1-amine                             | 111-86-4    | 1.01         | 298.15     | 779.95                                | 118 | 55.10                                       | 114 | 273.15       | 120 | 452.75       | 121 | 643.92       | 121 | 3.58       | 120 |
| 1298      | 1090      | V   | M9101a | 2,6-dimethylheptan-4-amine                | 65530-92-9  | 1.0          | 293.15     | 771.90                                | 117 | -                                           | -   | -            | -   | -            | -   | -            | -   | (3.42)     | -   |
| 1299      | 1091      | V   | M9102a | 2-propylhexan-1-amine                     | 857818-18-9 | 1.0          | 298.15     | 789.20                                | 117 | -                                           | -   | -            | -   | -            | -   | -            | -   | (3.42)     | -   |
| 1300      | 1092      | V   | M9103a | nonan-1-amine                             | 112-20-9    | 1.0          | 293.15     | 788.60                                | 120 | -                                           | -   | 272.15       | 120 | 475.35       | 121 | 668.22       | 121 | 3.42       | 120 |
| 1301      | 1092      | V   | M9103b | nonan-1-amine                             | 112-20-9    | 0.01         | 362.33     | -                                     | -   | 49.47                                       | 121 | 272.15       | 120 | 475.35       | 121 | 668.22       | 121 | 3.42       | 120 |
| 1302      | 1093      | V   | M0101a | decan-1-amine                             | 2016-57-1   | 1.0          | 298.15     | 789.00                                | 117 | 64.90                                       | 114 | 288.15       | 120 | 493.65       | 121 | 690.90       | 121 | 3.31       | 120 |
| 1303      | 1094      | V   | N7101a | 2-methyl-N-propan-2-ylpropan-2-amine      | 7515-80-2   | 0.03         | 298.15     | 726.91                                | 121 | -                                           | -   | -            | -   | 371.15       | 121 | 577.70       | 121 | (3.12)     | -   |
| 1304      | 1094      | V   | N7101b | 2-methyl-N-propan-2-ylpropan-2-amine      | 7515-80-2   | 1.0          | 287.0      | -                                     | -   | 35.70                                       | 114 | -            | -   | 371.15       | 121 | 577.70       | 121 | (3.12)     | -   |
| 1305      | 1095      | V   | N7102a | N-propan-2-ylbutan-1-amine                | 39099-23-5  | 1.0          | 298.0      | -                                     | -   | 42.10                                       | 114 | -            | -   | -            | -   | -            | -   | (3.12)     | -   |
| 1306      | 1096      | V   | N7103a | N-propylbutan-1-amine                     | 20193-21-9  | 0.01         | 307.37     | 737.22                                | 121 | -                                           | -   | -            | -   | 406.65       | 121 | 577.70       | 121 | (3.12)     | -   |
| 1307      | 1097      | V   | N7104a | N-ethylpentan-1-amine                     | 17839-26-8  | 0.01         | 307.77     | 739.62                                | 121 | -                                           | -   | -            | -   | 407.15       | 121 | 577.70       | 121 | (3.12)     | -   |
| 1308      | 1098      | V   | N7105a | N-methylhexan-1-amine                     | 35161-70-7  | 1.0          | 293.15     | 778.70                                | 117 | -                                           | -   | -            | -   | 415.15       | 121 | 577.70       | 121 | (3.12)     | -   |
| 1309      | 1098      | V   | N7105b | N-methylhexan-1-amine                     | 35161-70-7  | 0.01         | 314.17     | -                                     | -   | 42.98                                       | 121 | -            | -   | 415.15       | 121 | 577.70       | 121 | (3.12)     | -   |
| 1310      | 1099      | V   | N8101a | N-butan-2-ylbutan-2-amine                 | 626-23-3    | 1.0          | 298.15     | 749.02                                | 117 | 41.3                                        | 114 | -            | -   | 407.15       | 121 | 603.92       | 121 | (2.77)     | -   |
| 1311      | 1100      | V   | N8102a | 2-methyl-N-(2-methylpropyl)propan-1-amine | 110-96-3    | 1.0          | 298.15     | 740.74                                | 117 | -                                           | -   | 199.65       | 120 | 412.25       | 121 | 603.92       | 121 | (2.77)     | -   |
| 1312      | 1100      | V   | N8102b | 2-methyl-N-(2-methylpropyl)propan-1-amine | 110-96-3    | 0.01         | 311.85     | -                                     | -   | 41.82                                       | 121 | 199.65       | 120 | 412.25       | 121 | 603.92       | 121 | (2.77)     | -   |
| 1313      | 1101      | V   | N8104a | N-(2-methylpropyl)butan-1-amine           | 20810-06-4  | 1.0          | 328.0      | -                                     | -   | 41.20                                       | 114 | -            | -   | -            | -   | -            | -   | (2.77)     | -   |
| 1314      | 1102      | V   | N8105a | N-butylbutan-1-amine                      | 111-92-2    | 1.0          | 298.15     | 755.72                                | 117 | 49.40                                       | 114 | 211.35       | 120 | 432.00       | 121 | 602.30       | 121 | 2.765      | 120 |
| 1315      | 1103      | V   | N8106a | N-ethylhexan-1-amine                      | 20352-67-4  | 0.01         | 326.97     | 735.33                                | 121 | -                                           | -   | -            | -   | 431.15       | 121 | 603.92       | 121 | (2.77)     | -   |
| 1316      | 1104      | V   | N8107a | N-methylheptan-1-amine                    | 36343-05-2  | 1.0          | 273.15     | 771.20                                | 117 | -                                           | -   | -            | -   | 438.15       | 121 | 603.92       | 121 | (2.77)     | -   |
| 1317      | 1105      | V   | N9101a | N-tert-butyl-2-methylbutan-2-amine        | 2085-66-7   | 0.01         | 315.77     | 756.44                                | 121 | -                                           | -   | -            | -   | 417.15       | 121 | 628.22       | 121 | (3.12)     | -   |
| 1318      | 1106      | V   | N9102a | N-ethylheptan-1-amine                     | 66793-76-8  | 1.0          | 298.15     | 767.52                                | 117 | -                                           | -   | -            | -   | 453.85       | 121 | 628.22       | 121 | (3.12)     | -   |
| 1319      | 1107      | V   | N9103a | N-methyloctan-1-amine                     | 2439-54-5   | 1.0          | 293.15     | 782.40                                | 117 | -                                           | -   | -            | -   | 459.85       | 121 | 628.22       | 121 | (3.12)     | -   |
| 1320      | 1107      | V   | N9103b | N-methyloctan-1-amine                     | 2439-54-5   | 1.0          | 380.0      | -                                     | -   | 49.20                                       | 114 | -            | -   | 459.85       | 121 | 628.22       | 121 | (3.12)     | -   |
| 1321      | 1108      | V   | N0101a | 3-methyl-N-(3-methylbutyl)butan-1-amine   | 544-00-3    | 1.0          | 298.15     | 766.88                                | 117 | -                                           | -   | 229.15       | 120 | 461.15       | 121 | 650.90       | 121 | (3.12)     | -   |
| 1322      | 1108      | V   | N0101b | 3-methyl-N-(3-methylbutyl)butan-1-amine   | 544-00-3    | 0.01         | 350.97     | -                                     | -   | 48.03                                       | 121 | 229.15       | 120 | 461.15       | 121 | 650.90       | 121 | (3.12)     | -   |
| 1323      | 1109      | V   | N0102a | N-pentylpentan-1-amine                    | 2050-92-2   | 1.0          | 298.15     | 773.25                                | 117 | 61.20                                       | 114 | -            | -   | 476.15       | 121 | 650.90       | 121 | (3.12)     | -   |
| 1324      | 1110      | V   | N0103a | N-ethyloctan-1-amine                      | 4088-36-2   | 1.0          | 298.15     | 774.30                                | 117 | -                                           | -   | -            | -   | 475.15       | 121 | 650.90       | 121 | (3.12)     | -   |
| 1325      | 1111      | V   | N0104a | N-methylnonan-1-amine                     | 39093-27-1  | 1.0          | 292.15     | 784.00                                | 117 | -                                           | -   | -            | -   | 480.15       | 121 | 650.90       | 121 | (3.12)     | -   |
| 1326      | 1112      | V   | R7101a | N,N,2-trimethylbutan-2-amine              | 57757-60-5  | 0.02         | 298.15     | 732.10                                | 121 | -                                           | -   | -            | -   | 391.15       | 121 | 577.70       | 121 | (2.41)     | -   |
| 1327      | 1113      | V   | R7102a | N-ethyl-N,2-dimethylpropan-2-amine        | 52841-28-8  | 0.02         | 298.15     | 744.51                                | 121 | 37.78                                       | 121 | -            | -   | 383.15       | 121 | 577.70       | 121 | (2.41)     | -   |
| 1328      | 1114      | V   | R7103a | N,N,2,2-tetramethylpropan-1-amine         | 10076-31-0  | 0.02         | 298.15     | 732.21                                | 121 | -                                           | -   | -            | -   | 390.50       | 121 | 577.70       | 121 | (2.41)     | -   |
| 1329      | 1115      | V   | R7104a | N-methyl-N-propan-2-ylpropan-2-amine      | 10342-97-9  | 0.02         | 298.15     | 749.49                                | 121 | -                                           | -   | -            | -   | 385.15       | 121 | 577.70       | 121 | (2.41)     | -   |
| 1330      | 1116      | V   | R7105a | N,N,3-trimethylbutan-2-amine              | 66225-38-5  | 0.02         | 298.15     | 732.10                                | 121 | -                                           | -   | -            | -   | 390.50       | 121 | 577.70       | 121 | (2.41)     | -   |
| 1331      | 1117      | V   | R7106a | N,N-dimethylpentan-3-amine                | 18636-94-7  | 0.02         | 298.15     | 750.75                                | 121 | 38.98                                       | 121 | -            | -   | 389.15       | 121 | 577.70       | 121 | (2.41)     | -   |
| 1332      | 1118      | V   | R7107a | N-ethyl-N-methylbutan-2-amine             | 66225-41-0  | 0.03         | 298.15     | 715.35                                | 121 | -                                           | -   | -            | -   | 376.15       | 121 | 577.70       | 121 | (2.41)     | -   |
| 1333      | 1119      | V   | R7108a | N,N-dimethylpentan-2-amine                | 57303-85-2  | 0.02         | 298.15     | 717.08                                | 121 | -                                           | -   | -            | -   | 382.15       | 121 | 577.70       | 121 | (2.41)     | -   |
| 1334      | 1120      | V   | R7109a | N,N-diethylpropan-2-amine                 | 6006-15-1   | 0.03         | 298.15     | 738.97                                | 121 | 37.51                                       | 121 | -            | -   | 381.65       | 121 | 577.70       | 121 | (2.41)     | -   |
| 1335      | 1121      | V   | R7110a | N-methyl-N-propan-2-ylpropan-1-amine      | 66225-42-1  | 0.02         | 298.15     | 749.97                                | 121 | -                                           | -   | -            | -   | 386.00       | 121 | 577.70       | 121 | (2.41)     | -   |
| 1336      | 1122      | V   | R7111a | N,N,2-trimethylbutan-1-amine              | 66225-39-6  | 0.02         | 298.15     | 752.10                                | 121 | -                                           | -   | -            | -   | 388.00       | 121 | 577.70       | 121 | (2.41)     | -   |
| 1337      | 1123      | V   | R7112a | N-ethyl-N,2-dimethylpropan-1-amine        | 60247-14-5  | 0.03         | 298.15     | 729.47                                | 121 | -                                           | -   | -            | -   | 380.15       | 121 | 577.70       | 121 | (2.41)     | -   |
| 1338      | 1124      | V   | R7113a | N,N,3-trimethylbutan-1-amine              | 2315-43-7   | 0.02         | 298.15     | 751.97                                | 121 | 38.42                                       | 121 | -            | -   | 386.65       | 121 | 577.70       | 121 | (2.41)     | -   |
| 1339      | 1125      | V   | R7114a | N,N-diethylpropan-1-amine                 | 4458-31-5   | 0.02         | 298.15     | 737.98                                | 121 | 38.16                                       | 121 | -            | -   | 385.15       | 121 | 577.70       | 121 | (2.41)     | -   |
| 1340      | 1126      | V   | R7115a | N-methyl-N-propylpropan-1-amine           | 3405-42-3   | 0.02         | 298.15     | 750.10                                | 121 | 38.42                                       | 121 | -            | -   | 387.25       | 121 | 577.70       | 121 | (2.41)     | -   |
| 1341      | 1127      | V   | R7116a | N-ethyl-N-methylbutan-1-amine             | 66225-40-9  | 0.02         | 298.15     | 731.93                                | 121 | 39.08                                       | 121 | -            | -   | 390.15       | 121 | 577.70       | 121 | (2.41)     | -   |

Table S.1 – Reference experimental data (continued)

| $n_{sim}$ | $n_{iso}$ | Set | Code   | Name                                          | CAS        | $P$<br>[bar] | $T$<br>[K] | $\rho_{liq}$<br>[kg·m <sup>-3</sup> ] | Src            | $\Delta H_{vap}$<br>[kJ·mol <sup>-1</sup> ] | Src            | $T_m$<br>[K] | Src            | $T_b$<br>[K] | Src            | $T_c$<br>[K] | Src            | $\epsilon$ | Src            |
|-----------|-----------|-----|--------|-----------------------------------------------|------------|--------------|------------|---------------------------------------|----------------|---------------------------------------------|----------------|--------------|----------------|--------------|----------------|--------------|----------------|------------|----------------|
| 1342      | 1128      | V   | R7117a | N,N-dimethylpentan-1-amine                    | 26153-88-8 | 0.01         | 298.15     | 731.80                                | <sup>121</sup> | 40.03                                       | <sup>121</sup> | -            | -              | 395.15       | <sup>121</sup> | 577.70       | <sup>121</sup> | (2.41)     | -              |
| 1343      | 1129      | V   | R8101a | N,2-dimethyl-N-propan-2-ylpropan-2-amine      | 85523-00-8 | 0.01         | 302.17     | 763.81                                | <sup>121</sup> | -                                           | -              | -            | -              | 400.15       | <sup>121</sup> | 603.92       | <sup>121</sup> | (2.41)     | -              |
| 1344      | 1130      | V   | R8102a | N-ethyl-N-propan-2-ylpropan-2-amine           | 7087-68-5  | 1.0          | 313.15     | 749.00                                | <sup>117</sup> | -                                           | -              | -            | -              | 399.65       | <sup>121</sup> | 603.92       | <sup>121</sup> | (2.41)     | -              |
| 1345      | 1130      | V   | R8102b | N-ethyl-N-propan-2-ylpropan-2-amine           | 7087-68-5  | 0.01         | 301.77     | -                                     | -              | 40.02                                       | <sup>121</sup> | -            | -              | 399.65       | <sup>121</sup> | 603.92       | <sup>121</sup> | (2.41)     | -              |
| 1346      | 1131      | V   | R8103a | N-ethyl-N-propylpropan-1-amine                | 20634-92-8 | 0.01         | 310.97     | 795.50                                | <sup>121</sup> | 40.37                                       | <sup>121</sup> | -            | -              | 411.15       | <sup>121</sup> | 603.92       | <sup>121</sup> | (2.41)     | -              |
| 1347      | 1132      | V   | R8104a | N,N-diethylbutan-1-amine                      | 4444-68-2  | 1.0          | 293.15     | 742.00                                | <sup>117</sup> | -                                           | -              | -            | -              | 409.15       | <sup>121</sup> | 603.92       | <sup>121</sup> | (2.41)     | -              |
| 1348      | 1132      | V   | R8104b | N,N-diethylbutan-1-amine                      | 4444-68-2  | 0.01         | 309.37     | -                                     | -              | 41.40                                       | <sup>121</sup> | -            | -              | 409.15       | <sup>121</sup> | 603.92       | <sup>121</sup> | (2.41)     | -              |
| 1349      | 1133      | V   | R8105a | N-methyl-N-propylbutan-1-amine                | 24551-99-3 | 1.0          | 298.15     | 742.00                                | <sup>117</sup> | -                                           | -              | -            | -              | -            | -              | -            | -              | (2.41)     | -              |
| 1350      | 1134      | V   | R8106a | N,N-dimethylhexan-1-amine                     | 4385-04-0  | 0.01         | 316.57     | 729.49                                | <sup>121</sup> | 43.38                                       | <sup>121</sup> | -            | -              | 418.15       | <sup>121</sup> | 603.92       | <sup>121</sup> | (2.41)     | -              |
| 1351      | 1135      | V   | R9101a | N,N-dipropylpropan-1-amine                    | 102-69-2   | 1.0          | 298.15     | 752.88                                | <sup>117</sup> | 46.20                                       | <sup>114</sup> | 172.65       | <sup>120</sup> | 429.65       | <sup>121</sup> | 628.22       | <sup>121</sup> | 2.380      | <sup>120</sup> |
| 1352      | 1136      | V   | R9102a | N,N-diethylpentan-1-amine                     | 2162-91-6  | 1.0          | 293.15     | 766.30                                | <sup>117</sup> | -                                           | -              | -            | -              | 429.15       | <sup>121</sup> | 628.22       | <sup>121</sup> | (2.38)     | -              |
| 1353      | 1136      | V   | R9102b | N,N-diethylpentan-1-amine                     | 2162-91-6  | 0.01         | 325.37     | -                                     | -              | 43.83                                       | <sup>121</sup> | -            | -              | 429.15       | <sup>121</sup> | 628.22       | <sup>121</sup> | (2.38)     | -              |
| 1354      | 1137      | V   | R9103a | N-butyl-N-methylbutan-1-amine                 | 3405-45-6  | 1.0          | 293.15     | 759.30                                | <sup>117</sup> | -                                           | -              | -            | -              | 432.75       | <sup>121</sup> | 628.22       | <sup>121</sup> | (2.38)     | -              |
| 1355      | 1138      | V   | R9104a | N,N-dimethylheptan-1-amine                    | 5277-11-2  | 1.0          | 293.15     | 758.00                                | <sup>117</sup> | -                                           | -              | -            | -              | 445.15       | <sup>121</sup> | 628.22       | <sup>121</sup> | (2.38)     | -              |
| 1356      | 1138      | V   | R9104b | N,N-dimethylheptan-1-amine                    | 5277-11-2  | 0.01         | 338.17     | -                                     | -              | 45.82                                       | <sup>121</sup> | -            | -              | 445.15       | <sup>121</sup> | 628.22       | <sup>121</sup> | (2.38)     | -              |
| 1357      | 1139      | V   | R0101a | 2-methyl-N,N-di(propan-2-yl)propan-1-amine    | 44976-81-0 | 0.01         | 338.05     | 737.61                                | <sup>121</sup> | -                                           | -              | -            | -              | 445.00       | <sup>121</sup> | 650.90       | <sup>121</sup> | (2.41)     | -              |
| 1358      | 1140      | V   | R0102a | 2-ethyl-N,N-dimethylhexan-1-amine             | 28056-87-3 | 1.0          | 293.15     | 768.60                                | <sup>117</sup> | -                                           | -              | -            | -              | -            | -              | -            | -              | (2.41)     | -              |
| 1359      | 1141      | V   | R0103a | N,N-diethylhexan-1-amine                      | 44979-90-0 | 0.01         | 343.77     | 732.26                                | <sup>121</sup> | 46.69                                       | <sup>121</sup> | -            | -              | 452.15       | <sup>121</sup> | 650.90       | <sup>121</sup> | (2.41)     | -              |
| 1360      | 1142      | V   | R0104a | N,N-dimethyloctan-1-amine                     | 7378-99-6  | 1.0          | 293.15     | 768.70                                | <sup>117</sup> | -                                           | -              | -            | -              | 464.15       | <sup>121</sup> | 650.90       | <sup>121</sup> | (2.41)     | -              |
| 1361      | 1142      | V   | R0104b | N,N-dimethyloctan-1-amine                     | 7378-99-6  | 1.0          | 303.0      | -                                     | -              | 54.00                                       | <sup>114</sup> | -            | -              | 464.15       | <sup>121</sup> | 650.90       | <sup>121</sup> | (2.41)     | -              |
| 1362      | 1143      | V   | N7201a | N,N,N',N'-tetramethylpropane-1,3-diamine      | 110-95-2   | 1.0          | 291.15     | 783.70                                | <sup>120</sup> | -                                           | -              | -            | -              | 417.15       | <sup>121</sup> | -            | -              | (13.82)    | -              |
| 1363      | 1143      | V   | N7201b | N,N,N',N'-tetramethylpropane-1,3-diamine      | 110-95-2   | 1.0          | 298.0      | -                                     | -              | 45.30                                       | <sup>114</sup> | -            | -              | 417.15       | <sup>121</sup> | -            | -              | (13.82)    | -              |
| 1364      | 1144      | V   | N7202a | N',N',2,2-tetramethylpropane-1,3-diamine      | 53369-71-4 | 1.0          | 429.65     | -                                     | -              | 37.17                                       | <sup>121</sup> | -            | -              | 429.65       | <sup>121</sup> | -            | -              | (13.82)    | -              |
| 1365      | 1145      | V   | N7203a | N',N'-diethyl-N-methylethane-1,2-diamine      | 104-79-0   | 1.0          | 431.65     | -                                     | -              | 37.36                                       | <sup>121</sup> | -            | -              | 431.65       | <sup>121</sup> | -            | -              | (13.82)    | -              |
| 1366      | 1146      | V   | N7205a | N',N'-diethylpropane-1,3-diamine              | 104-78-9   | 1.0          | 293.15     | 822.00                                | <sup>120</sup> | 52.40                                       | <sup>114</sup> | -            | -              | 441.65       | <sup>121</sup> | -            | -              | (13.82)    | -              |
| 1367      | 1147      | V   | N7206a | heptane-1,7-diamine                           | 646-19-5   | 1.0          | 298.0      | -                                     | -              | 298.45                                      | <sup>114</sup> | 298.45       | <sup>120</sup> | 497.15       | <sup>121</sup> | -            | -              | (13.82)    | -              |
| 1368      | 1148      | V   | N8201a | 1-N,1-N,3-N,3-N-tetramethylbutane-1,3-diamine | 97-84-7    | 1.0          | 298.0      | -                                     | -              | 47.90                                       | <sup>114</sup> | -            | -              | 437.70       | <sup>121</sup> | -            | -              | (13.82)    | -              |
| 1369      | 1149      | V   | N8202a | N,N,N',N'-tetramethylbutane-1,4-diamine       | 111-51-3   | 1.0          | 288.15     | 794.20                                | <sup>120</sup> | -                                           | -              | -            | -              | 441.15       | <sup>121</sup> | -            | -              | (13.82)    | -              |
| 1370      | 1149      | V   | N8202b | N,N,N',N'-tetramethylbutane-1,4-diamine       | 111-51-3   | 1.0          | 441.15     | -                                     | -              | 38.26                                       | <sup>121</sup> | -            | -              | 441.15       | <sup>121</sup> | -            | -              | (13.82)    | -              |
| 1371      | 1150      | V   | N8204a | N',N'-di(propan-2-yl)ethane-1,2-diamine       | 121-05-1   | 1.0          | 394.15     | -                                     | -              | 33.81                                       | <sup>121</sup> | -            | -              | 394.15       | <sup>121</sup> | -            | -              | (13.82)    | -              |
| 1372      | 1151      | V   | N8205a | N,N'-di(propan-2-yl)ethane-1,2-diamine        | 4013-94-9  | 1.0          | 443.15     | -                                     | -              | 38.45                                       | <sup>121</sup> | -            | -              | 443.15       | <sup>121</sup> | -            | -              | (13.82)    | -              |
| 1373      | 1152      | V   | N8206a | 2,5-dimethylhexane-2,5-diamine                | 23578-35-0 | 1.0          | 288.15     | 848.50                                | <sup>120</sup> | -                                           | -              | -            | -              | 457.15       | <sup>121</sup> | -            | -              | (13.82)    | -              |
| 1374      | 1152      | V   | N8206b | 2,5-dimethylhexane-2,5-diamine                | 23578-35-0 | 1.0          | 457.15     | -                                     | -              | 39.78                                       | <sup>121</sup> | -            | -              | 457.15       | <sup>121</sup> | -            | -              | (13.82)    | -              |
| 1375      | 1153      | V   | N8207a | N,N',N'-triethylethane-1,2-diamine            | 105-04-4   | 1.0          | 327.65     | -                                     | -              | 27.61                                       | <sup>121</sup> | -            | -              | 327.65       | <sup>121</sup> | -            | -              | (13.82)    | -              |
| 1376      | 1154      | V   | N8210a | octane-1,8-diamine                            | 373-44-4   | 1.0          | 498.15     | -                                     | -              | 43.71                                       | <sup>121</sup> | 324.85       | <sup>120</sup> | 498.15       | <sup>121</sup> | -            | -              | (13.82)    | -              |
| 1377      | 1155      | V   | N9201a | N,N,N',N'-tetraethylmethanedi-amine           | 102-53-4   | 1.0          | 293.15     | 800.00                                | <sup>120</sup> | -                                           | -              | -            | -              | 438.95       | <sup>121</sup> | -            | -              | (13.82)    | -              |
| 1378      | 1155      | V   | N9201b | N,N,N',N'-tetraethylmethanedi-amine           | 102-53-4   | 1.0          | 438.95     | -                                     | -              | 38.05                                       | <sup>121</sup> | -            | -              | 438.95       | <sup>121</sup> | -            | -              | (13.82)    | -              |
| 1379      | 1156      | V   | N9203a | 1-N,1-N-diethylpentane-1,4-diamine            | 140-80-7   | 1.0          | 293.15     | 814.00                                | <sup>120</sup> | -                                           | -              | -            | -              | 474.15       | <sup>121</sup> | -            | -              | (13.82)    | -              |
| 1380      | 1156      | V   | N9203b | 1-N,1-N-diethylpentane-1,4-diamine            | 140-80-7   | 1.0          | 474.15     | -                                     | -              | 41.41                                       | <sup>121</sup> | -            | -              | 474.15       | <sup>121</sup> | -            | -              | (13.82)    | -              |
| 1381      | 1157      | V   | N9204a | nonane-1,9-diamine                            | 646-24-2   | 1.0          | 298.0      | -                                     | -              | 75.50                                       | <sup>114</sup> | -            | -              | 531.65       | <sup>121</sup> | -            | -              | (13.82)    | -              |
| 1382      | 1158      | V   | N0201a | N,N'-di tert-butylethane-1,2-diamine          | 4062-60-6  | 1.0          | 326.5      | 775.74                                | <sup>121</sup> | -                                           | -              | 326.45       | <sup>120</sup> | 470.15       | <sup>121</sup> | 625.00       | <sup>121</sup> | (13.82)    | -              |
| 1383      | 1159      | V   | N0202a | N,N,N',N'-tetraethylethane-1,2-diamine        | 150-77-6   | 1.0          | 298.15     | 808.00                                | <sup>120</sup> | -                                           | -              | -            | -              | 465.15       | <sup>121</sup> | -            | -              | (13.82)    | -              |
| 1384      | 1159      | V   | N0202b | N,N,N',N'-tetraethylethane-1,2-diamine        | 150-77-6   | 1.0          | 465.15     | -                                     | -              | 40.55                                       | <sup>121</sup> | -            | -              | 465.15       | <sup>121</sup> | -            | -              | (13.82)    | -              |
| 1385      | 1160      | V   | N0203a | N,N,N',N'-tetramethylhexane-1,6-diamine       | 111-18-2   | 1.0          | 298.15     | 806.00                                | <sup>120</sup> | -                                           | -              | -            | -              | 482.65       | <sup>121</sup> | -            | -              | (13.82)    | -              |
| 1386      | 1160      | V   | N0203b | N,N,N',N'-tetramethylhexane-1,6-diamine       | 111-18-2   | 1.0          | 482.65     | -                                     | -              | 42.22                                       | <sup>121</sup> | -            | -              | 482.65       | <sup>121</sup> | -            | -              | (13.82)    | -              |
| 1387      | 1161      | V   | N0204a | N,N'-dimethyloctane-1,8-diamine               | 33563-54-1 | 1.0          | 522.15     | -                                     | -              | 46.02                                       | <sup>121</sup> | -            | -              | 522.15       | <sup>121</sup> | -            | -              | (13.82)    | -              |
| 1388      | 1162      | V   | N0206a | decane-1,10-diamine                           | 646-25-3   | 1.0          | 345.0      | -                                     | -              | 73.60                                       | <sup>114</sup> | 332.85       | <sup>120</sup> | 485.03       | <sup>121</sup> | -            | -              | (13.82)    | -              |
| 1389      | 1163      | V   | D7401a | heptanamide                                   | 628-62-6   | 1.0          | 298.15     | -                                     | -              | 82.40                                       | <sup>118</sup> | 368.6        | <sup>118</sup> | 527.15       | <sup>121</sup> | -            | -              | (43.86)    | -              |

Table S.1 – Reference experimental data (continued)

| $n_{sim}$ | $n_{iso}$ | Set | Code   | Name                                | CAS        | $P$<br>[bar] | $T$<br>[K] | $\rho_{liq}$<br>[kg·m <sup>-3</sup> ] | Src            | $\Delta H_{vap}$<br>[kJ·mol <sup>-1</sup> ] | Src            | $T_m$<br>[K] | Src            | $T_b$<br>[K] | Src            | $T_c$<br>[K] | Src            | $\epsilon$ | Src |
|-----------|-----------|-----|--------|-------------------------------------|------------|--------------|------------|---------------------------------------|----------------|---------------------------------------------|----------------|--------------|----------------|--------------|----------------|--------------|----------------|------------|-----|
| 1390      | 1164      | V   | D8402a | 2-propylpentanamide                 | 2430-27-5  | 1.0          | 298.0      | -                                     | -              | 83.60                                       | <sup>114</sup> | -            | -              | 472.28       | <sup>121</sup> | -            | -              | (43.86)    | -   |
| 1391      | 1165      | V   | D8403a | octanamide                          | 629-01-6   | 1.0          | 383.15     | 845.00                                | <sup>120</sup> | -                                           | -              | 378.15       | <sup>120</sup> | 512.15       | <sup>121</sup> | -            | -              | (43.86)    | -   |
| 1392      | 1165      | V   | D8403b | octanamide                          | 629-01-6   | 1.0          | 512.15     | -                                     | -              | 45.05                                       | <sup>121</sup> | 378.15       | <sup>120</sup> | 512.15       | <sup>121</sup> | -            | -              | (43.86)    | -   |
| 1393      | 1166      | V   | D7201a | N,N,2,2-tetramethylpropanamide      | 24331-71-3 | 1.0          | 298.0      | -                                     | -              | 55.10                                       | <sup>114</sup> | -            | -              | -            | -              | -            | -              | (35.30)    | -   |
| 1394      | 1167      | V   | D7202a | N,N-diethylpropanamide              | 1114-51-8  | 1.0          | 293.15     | 897.20                                | <sup>120</sup> | -                                           | -              | -            | -              | 464.15       | <sup>121</sup> | -            | -              | (35.30)    | -   |
| 1395      | 1167      | V   | D7202b | N,N-diethylpropanamide              | 1114-51-8  | 1.0          | 464.15     | -                                     | -              | 40.45                                       | <sup>121</sup> | -            | -              | 464.15       | <sup>121</sup> | -            | -              | (35.30)    | -   |
| 1396      | 1168      | V   | D7203a | N,N-dimethylpentanamide             | 6225-06-5  | 1.0          | 298.15     | 896.20                                | <sup>120</sup> | -                                           | -              | 222.15       | <sup>120</sup> | 458.76       | <sup>121</sup> | -            | -              | (35.30)    | -   |
| 1397      | 1169      | V   | D8201a | N,N-di(propan-2-yl)acetamide        | 759-22-8   | 0.06         | 389.2      | 808.80                                | <sup>121</sup> | 46.07                                       | <sup>121</sup> | -            | -              | 469.15       | <sup>121</sup> | 700.00       | <sup>121</sup> | (35.30)    | -   |
| 1398      | 1170      | V   | D8202a | N,N-diethylbutanamide               | 1114-76-7  | 1.0          | 293.15     | 888.40                                | <sup>120</sup> | -                                           | -              | -            | -              | 479.15       | <sup>121</sup> | -            | -              | (35.30)    | -   |
| 1399      | 1170      | V   | D8202b | N,N-diethylbutanamide               | 1114-76-7  | 1.0          | 313.0      | -                                     | -              | 38.70                                       | <sup>114</sup> | -            | -              | 479.15       | <sup>121</sup> | -            | -              | (35.30)    | -   |
| 1400      | 1171      | V   | D8203a | N,N-dimethylhexanamide              | 5830-30-8  | 1.0          | 408.15     | -                                     | -              | 35.13                                       | <sup>121</sup> | -            | -              | 408.15       | <sup>121</sup> | -            | -              | (35.30)    | -   |
| 1401      | 1172      | V   | D8204a | N,N-dipropylacetamide               | 1116-24-1  | 1.0          | 290.15     | 899.20                                | <sup>120</sup> | -                                           | -              | -            | -              | 482.65       | <sup>121</sup> | 700.00       | <sup>121</sup> | (35.30)    | -   |
| 1402      | 1173      | V   | D9201a | N,N-diethyl-2,2-dimethylpropanamide | 24331-72-4 | 1.0          | 479.15     | -                                     | -              | 41.88                                       | <sup>121</sup> | -            | -              | 479.15       | <sup>121</sup> | -            | -              | (35.30)    | -   |
| 1403      | 1174      | V   | D9202a | N,N-diethyl-3-methylbutanamide      | 533-32-4   | 1.0          | 293.15     | 876.40                                | <sup>120</sup> | -                                           | -              | -            | -              | 484.15       | <sup>121</sup> | -            | -              | (35.30)    | -   |
| 1404      | 1174      | V   | D9202b | N,N-diethyl-3-methylbutanamide      | 533-32-4   | 1.0          | 484.15     | -                                     | -              | 42.36                                       | <sup>121</sup> | -            | -              | 484.15       | <sup>121</sup> | -            | -              | (35.30)    | -   |
| 1405      | 1175      | V   | D0202a | N,N-diethylhexanamide               | 6282-97-9  | 1.0          | 388.0      | -                                     | -              | 47.70                                       | <sup>114</sup> | -            | -              | -            | -              | -            | -              | (35.30)    | -   |

### S.3 Covalent Interaction Parameters

The covalent interaction parameters were not subject to optimization, and ported directly from the 2016H66 parameter set.<sup>112</sup> The corresponding values are provided in Tab. S.2. For the torsional-dihedral potentials, the 2016H66 parameter set includes 12 types A-L relevant for the molecules of the O+N family. These are shown in Fig. S.3a, and the corresponding parameters are listed in Tab. S.2. Due to the inclusion of polyfunctional compounds in the present calculations (multiple occurrences of the same functional group), the assignment of these torsional-dihedral types has been generalized as shown in Fig. S.3b.

| Bond stretching                                                             |                                               |             |                                             |                       |
|-----------------------------------------------------------------------------|-----------------------------------------------|-------------|---------------------------------------------|-----------------------|
| Quartic force constant<br>[ $10^6$ kJ·mol <sup>-1</sup> ·nm <sup>-4</sup> ] | Reference bond length<br>[nm]                 |             | Usage                                       |                       |
| 15.70                                                                       | 0.1000                                        |             | H - OA                                      |                       |
| 18.70                                                                       | 0.1000                                        |             | H - N                                       |                       |
| 12.30                                                                       | 0.1090                                        |             | HC - C                                      |                       |
| 16.60                                                                       | 0.1230                                        |             | C = O                                       |                       |
| 11.80                                                                       | 0.1330                                        |             | C, CR1 - N, NR                              |                       |
| 10.20                                                                       | 0.1360                                        |             | C - OA,OE                                   |                       |
| 8.18                                                                        | 0.1430                                        |             | CHn - OA,OE                                 |                       |
| 8.71                                                                        | 0.1470                                        |             | CHn - N, NR                                 |                       |
| 7.15                                                                        | 0.1530                                        |             | C,CHn - C,CHn                               |                       |
| Bond-angle bending                                                          |                                               |             |                                             |                       |
| Cosine-harmonic<br>force constant<br>[kJ·mol <sup>-1</sup> ]                | Reference bond angle<br>[deg]                 |             | Usage                                       |                       |
| 380                                                                         | 109.50                                        |             | H - NL, NT - H, CHn - OA - CHn              |                       |
| 425                                                                         | 109.50                                        |             | H - NL - C, CHn H - NT - CHn                |                       |
| 450                                                                         | 109.50                                        |             | X - OA, SI - X                              |                       |
| 520                                                                         | 109.50                                        |             | CHn,C - CHn - C, CHn, OA, OM, N, NE         |                       |
| 530                                                                         | 111.00                                        |             | CHn - CHn - C,CHn,OA,OE,NR,NT,NL            |                       |
| 545                                                                         | 113.00                                        |             | CHn - CH2 - S or CHn - C - OA,OE            |                       |
| 460                                                                         | 115.00                                        |             | H - N - CHn                                 |                       |
| 610                                                                         | 115.00                                        |             | CHn, C - C - OA, N, NT, NL                  |                       |
| 620                                                                         | 116.00                                        |             | CH2 - N - CH1 or CHn - C - CHn,HC           |                       |
| 635                                                                         | 117.00                                        |             | CH3 - N - C or CHn - C - OM or C - OE - CHn |                       |
| 390                                                                         | 120.00                                        |             | H - NT, NZ, NE - C                          |                       |
| 445                                                                         | 120.00                                        |             | H - NT, NZ - H                              |                       |
| 505                                                                         | 120.00                                        |             | H - N - CH3, H / H - NT - CHn / HC - C - O  |                       |
| 685                                                                         | 121.00                                        |             | O - C - CHn, C CH3 - N - CHn                |                       |
| 700                                                                         | 122.00                                        |             | CH1, CH2 - N - C / O - C - OA, OE, CHn      |                       |
| 415                                                                         | 123.00                                        |             | H - N - C                                   |                       |
| 730                                                                         | 124.00                                        |             | O - C - OA, N, NT, NL C - NE - CH2          |                       |
| 750                                                                         | 125.00                                        |             | CHn - C - O (carb. acids and esters)        |                       |
| Improper-dihedral distortion                                                |                                               |             |                                             |                       |
| Harmonic force constant<br>[kJ·mol <sup>-1</sup> deg <sup>-2</sup> ]        | Reference improper<br>dihedral angle<br>[deg] |             | Usage                                       |                       |
| 0.051                                                                       | 0.0                                           |             | planar groups                               |                       |
| 0.102                                                                       | 35.26439                                      |             | tetrahedral centers                         |                       |
| Torsional-dihedral rotation                                                 |                                               |             |                                             |                       |
| Type                                                                        | Force constant<br>[kJ·mol <sup>-1</sup> ]     | Phase shift | Multiplicity                                | Usage                 |
| A                                                                           | 5.920                                         | 0.0         | 3                                           | X,C - C - C - C,X     |
| B                                                                           | 0.931                                         | 180.0       | 1                                           | CHn-CHn-OE-CHn        |
| C                                                                           | 0.569                                         | 0.0         | 2                                           | CHn-CHn-OE-CHn        |
| D                                                                           | 4.682                                         | 0.0         | 3                                           | CHn-CHn-OE-CHn        |
| E                                                                           | 6.942                                         | 180.0       | 1                                           | OE-CHn-CHn-OE         |
| F                                                                           | 3.312                                         | 0.0         | 2                                           | OE-CHn-CHn-OE         |
| G                                                                           | 6.787                                         | 0.0         | 3                                           | OE-CHn-CHn-OE         |
| H                                                                           | 3.770                                         | 0.0         | 3                                           | -C,CHn,SI-            |
| I                                                                           | 1.000                                         | 0.0         | 6                                           | -CHn-C,NR(ring), CR1- |
| J                                                                           | 1.260                                         | 0.0         | 3                                           | -CHn-OA(no sugar)-    |
| K                                                                           | 3.500                                         | 180.0       | 2                                           | -C-N,NT,NE,NZ,NR-     |
| L                                                                           | 16.700                                        | 180.0       | 2                                           | -C-OA,OE-             |

Table S.2: Covalent types of the proposed GROMOS-compatible force field for the O+N family, along with the values of the associated parameters. These  $N_{\text{prm}}^{\text{cov}} = 94$  covalent interaction parameters are ported from the 2016H66 parameter set<sup>112</sup> and not subject to optimization. The application of the torsional-dihedral types is further detailed in Fig. S.3.

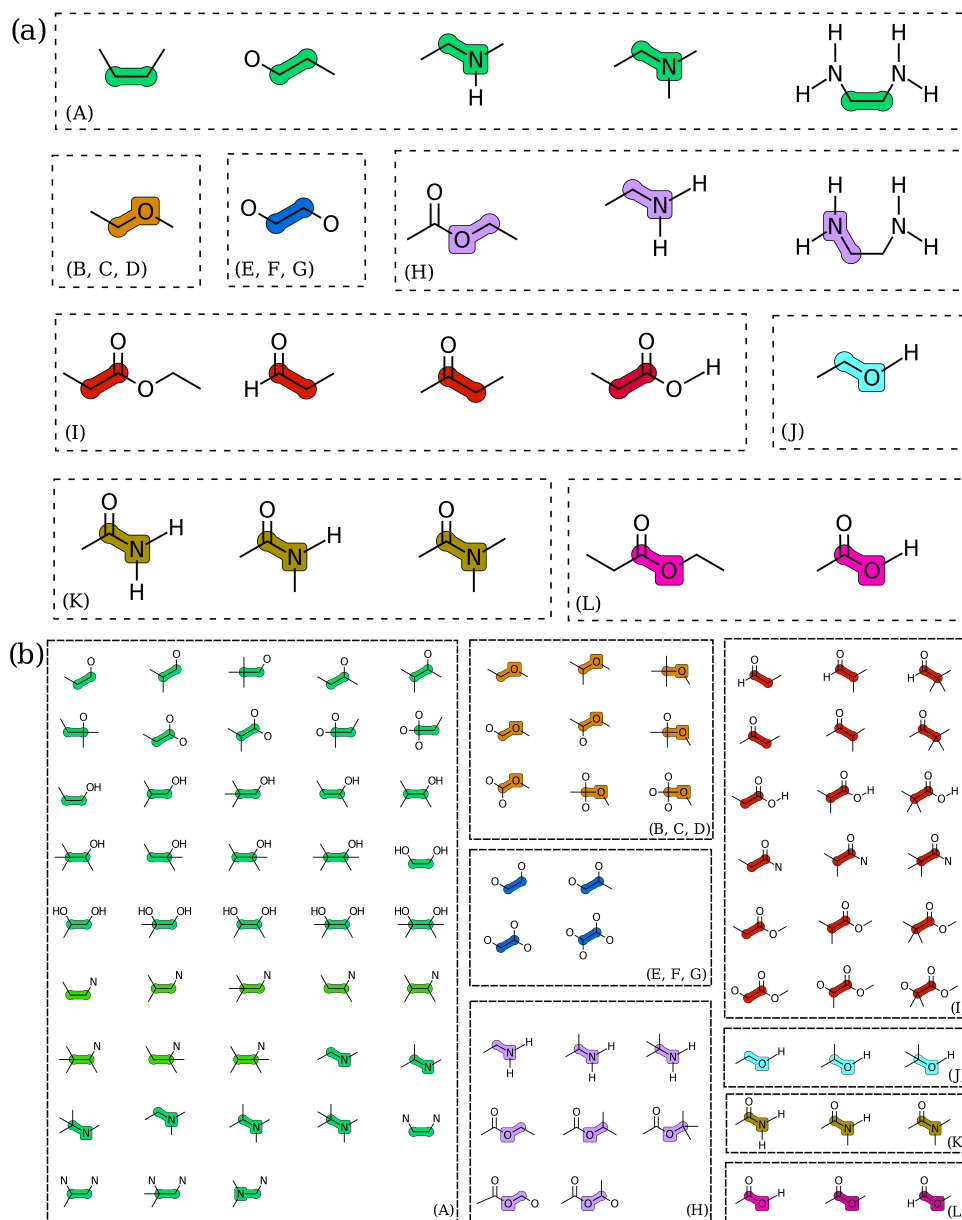

Figure S.3: Application of the different torsional-dihedral types considering (a) the 2016H66 parameter set<sup>112</sup> and (b) the proposed GROMOS-compatible force field for the O+N family. The parameters associated with the 12 types A-L are reported in Tab. S.2.

## S.4 Initial Values of the Non-Bonded Interaction Parameters

The initial values of the non-bonded interaction parameters, used to start the optimization, are reported in Tab. S.3 for the 47 EE-types and in Tab. S.4 for the 12 LJ-types.

| Idx                             | Atom type (EE-type) | LJ-type | $\eta$ [ $e^{-1}\cdot V$ ] | $\chi$ [V] | Usage                                                   |
|---------------------------------|---------------------|---------|----------------------------|------------|---------------------------------------------------------|
| Aliphatic carbon (united-)atoms |                     |         |                            |            |                                                         |
| 1                               | CH0                 | CH0     | -                          | -          | CH <sub>0</sub> carbon atom (methanetetryl group)       |
| 2                               | CH1                 | CH1     | -                          | -          | CH <sub>1</sub> carbon united-atom (methanetriyl group) |
| 3                               | CH2                 | CH2     | -                          | -          | CH <sub>2</sub> carbon united-atom (methylene group)    |
| 4                               | CH3                 | CH3     | -                          | -          | CH <sub>3</sub> carbon united-atom (methyl group)       |
| Ether                           |                     |         |                            |            |                                                         |
| 5                               | O_eth               | OR      | 33.917                     | 38.772     | ether oxygen alkoxy                                     |
| 6                               | CH0.O_eth           | CH0     | 2.937                      | 19.820     | alkoxylated CH <sub>0</sub> atom                        |
| 7                               | CH1.O_eth           | CH1     | 6.440                      | 19.123     | alkoxylated CH <sub>1</sub> united-atom                 |
| 8                               | CH2.O_eth           | CH2     | 12.894                     | 17.428     | alkoxylated CH <sub>2</sub> united-atom                 |
| 9                               | CH3.O_eth           | CH3     | 21.565                     | 14.641     | alkoxylated CH <sub>3</sub> united-atom                 |
| Aldehyde                        |                     |         |                            |            |                                                         |
| 10                              | H.CO_ald            | HC      | 15.789                     | 20.677     | aldehyde hydrogen atom                                  |
| 11                              | C_ald               | C=O     | 15.271                     | 17.113     | aldehyde carbonyl carbon atom                           |
| 12                              | O_ald               | O=C     | 8.334                      | 23.794     | aldehyde carbonyl oxygen atom                           |
| Ketone                          |                     |         |                            |            |                                                         |
| 13                              | C_ket               | C=O     | 35.039                     | 15.340     | ketone carbonyl carbon atom                             |
| 14                              | O_ket               | O=C     | 16.586                     | 39.562     | ketone carbonyl oxygen atom                             |
| Ester                           |                     |         |                            |            |                                                         |
| 15                              | H.CO_est            | HC      | 15.789                     | 20.677     | formate ester hydrogen atom                             |
| 16                              | C_est               | C=O     | 23.835                     | 12.918     | ester carbonyl carbon atom                              |
| 17                              | O_est               | O=C     | 13.065                     | 31.947     | ester carbonyl oxygen atom                              |
| 18                              | O.R_est             | OR      | 22.659                     | 33.044     | ester acylated oxygen atom                              |
| 19                              | CH0.O_est           | CH0     | 9.199                      | 22.355     | ester oxygen-linked CH <sub>0</sub> atom                |
| 20                              | CH1.O_est           | CH1     | 12.974                     | 21.229     | ester oxygen-linked CH <sub>1</sub> united-atom         |
| 21                              | CH2.O_est           | CH2     | 38.375                     | 13.922     | ester oxygen-linked CH <sub>2</sub> united-atom         |
| 22                              | CH3.O_est           | CH3     | 21.822                     | 18.698     | ester oxygen-linked CH <sub>3</sub> united-atom         |
| Alcohol                         |                     |         |                            |            |                                                         |
| 23                              | H.ol                | HB      | 34.153                     | 16.504     | hydroxyl hydrogen atom                                  |
| 24                              | O.ol                | OH      | 31.328                     | 46.650     | hydroxyl oxygen atom                                    |
| 25                              | CH0.O.ol            | CH0     | 32.971                     | 18.556     | hydroxylated CH <sub>0</sub> atom                       |
| 26                              | CH1.O.ol            | CH1     | 33.267                     | 18.687     | hydroxylated CH <sub>1</sub> united-atom                |
| 27                              | CH2.O.ol            | CH2     | 33.378                     | 18.838     | hydroxylated CH <sub>2</sub> united-atom                |
| 28                              | CH3.O.ol            | CH3     | 33.683                     | 18.848     | hydroxylated CH <sub>3</sub> united-atom                |
| Carboxylic acid                 |                     |         |                            |            |                                                         |
| 29                              | H.CO_acd            | HC      | 30.481                     | 13.942     | formic acid hydrogen atom                               |
| 30                              | C_acd               | C=O     | 30.317                     | 13.694     | carboxylic acid carbonyl carbon atom                    |
| 31                              | O_acd               | O=C     | 34.360                     | 45.492     | carboxylic acid carbonyl oxygen atom                    |
| 32                              | H.O_acd             | HB      | 30.481                     | 13.942     | carboxylic acid hydroxyl hydrogen atom                  |
| 33                              | O.H_acd             | OH      | 37.502                     | 37.512     | carboxylic acid hydroxyl oxygen atom                    |
| Amine                           |                     |         |                            |            |                                                         |
| 34                              | H.N_amn             | HB      | 43.176                     | 7.209      | amine hydrogen atom                                     |
| 35                              | N_amn               | N_amn   | 38.110                     | 50.797     | amine nitrogen atom                                     |
| 36                              | CH0.N_amn           | CH0     | 30.075                     | 12.090     | aminated CH <sub>0</sub> atom                           |
| 37                              | CH1.N_amn           | CH1     | 28.519                     | 13.156     | aminated CH <sub>1</sub> united-atom                    |
| 38                              | CH2.N_amn           | CH2     | 33.772                     | 12.233     | aminated CH <sub>2</sub> united-atom                    |
| 39                              | CH3.N_amn           | CH3     | 30.311                     | 14.639     | aminated CH <sub>3</sub> united-atom                    |
| Amide                           |                     |         |                            |            |                                                         |
| 40                              | H.N_amd             | HB      | 27.009                     | 11.761     | amide nitrogen-linked hydrogen atom                     |
| 41                              | C_amd               | C=O     | 30.587                     | 14.430     | amide carbonyl carbon atom                              |
| 42                              | O_amd               | O=C     | 29.866                     | 43.332     | amide carbonyl oxygen atom                              |
| 43                              | N_amd               | N_amd   | 32.398                     | 36.131     | amide acylated nitrogen atom                            |
| 44                              | CH0.N_amd           | CH0     | 35.585                     | 15.614     | amide nitrogen-linked CH <sub>0</sub> atom (estimated)  |
| 45                              | CH1.N_amd           | CH1     | 35.488                     | 17.475     | amide nitrogen-linked CH <sub>1</sub> united-atom       |
| 46                              | CH2.N_amd           | CH2     | 42.041                     | 15.944     | amide nitrogen-linked CH <sub>2</sub> united-atom       |
| 47                              | CH3.N_amd           | CH3     | 38.845                     | 16.767     | amide nitrogen-linked CH <sub>3</sub> united-atom       |

Table S.3: Initial values of the EE parameters, used to start the optimization. This table is similar to Main Article Tab. 3 (see the corresponding caption for details), but reports the initial instead of the final (optimized) values.



| LJ type  | $\sigma$ | $\tilde{\sigma}$<br>[nm] | $\sigma^*$ | $\epsilon$<br>[kJ·mol <sup>-1</sup> ] | $\epsilon^*$ | Usage                                                   |
|----------|----------|--------------------------|------------|---------------------------------------|--------------|---------------------------------------------------------|
| Carbon   |          |                          |            |                                       |              |                                                         |
| CH0      | 0.664    | -                        | 0.336      | 0.007                                 | 0.406        | CH <sub>0</sub> carbon atom (methanetetryl group)       |
| CH1      | 0.502    | -                        | 0.330      | 0.095                                 | 0.567        | CH <sub>1</sub> carbon united-atom (methanetriyl group) |
| CH2      | 0.407    | -                        | 0.316      | 0.411                                 | 1.176        | CH <sub>2</sub> carbon united-atom (methylene group)    |
| CH3      | 0.375    | -                        | 0.309      | 0.867                                 | 1.946        | CH <sub>3</sub> carbon united-atom (methyl group)       |
| C=O      | 0.358    | -                        | 0.336      | 0.277                                 | 0.406        | carbonyl carbon                                         |
| Oxygen   |          |                          |            |                                       |              |                                                         |
| OR       | 0.333    | 0.333                    | 0.287      | 0.309                                 | 1.011        | alkoxy oxygen                                           |
| O=C      | 0.289    | 0.289                    | 0.262      | 0.739                                 | 1.725        | carbonyl oxygen                                         |
| OH       | 0.295    | 0.295                    | 0.287      | 0.775                                 | 1.011        | hydroxyl oxygen                                         |
| Nitrogen |          |                          |            |                                       |              |                                                         |
| N_amn    | 0.318    | 0.318                    | 0.298      | 0.308                                 | 0.598        | nitrogen in amine                                       |
| N_amd    | 0.328    | 0.328                    | 0.298      | 0.312                                 | 0.459        | nitrogen in amide                                       |
| Hydrogen |          |                          |            |                                       |              |                                                         |
| HC       | 0.237    | -                        | 0.237      | 0.118                                 | 0.118        | aliphatic hydrogen                                      |
| HB       | 0.000    | -                        | 0.000      | 0.000                                 | 0.000        | hydrogen donor (not optimized)                          |

Table S.4: Initial values of the LJ parameters, used to start the optimization. This table is similar to Main Article Tab. 4 (see the corresponding caption for details), but reports the initial instead of the final (optimized) values.

## S.5 Observable-to-parameter Ratio for the LJ- and EE- Types

In this section, the observable-to-parameter ratio is analyzed separately for each of the LJ- and EE-types of the force field, see Tabs. S.5 and S.6. A favorable observable-to-parameter ratio is observed in most cases, except for EE-types occurring in a single molecule. These are the CH3 united-atom of EE-type CH3\_O\_ol (only found in methanol), the carbonyl-bound hydrogen atom of EE-type H\_CO\_acid (only found in formic acid) and the CH1 united-atom of EE-type CH1\_N\_amd (only included *via* compound D5302 of the calibration set, namely N-isopropyl acetamide). In one case, for the EE-type CH0\_N\_amd, no representative molecule is available at all, and the corresponding EE parameters  $\eta$  and  $\chi$  are estimated using the average values over the three other CH $n$ \_N\_amd types.

| LJ type  | $N^{\text{cal}}$ | $N_{\rho}^{\text{cal}}$ | $N_{\Delta H}^{\text{cal}}$ | $N^{\text{val}}$ | $N_{\rho}^{\text{val}}$ | $N_{\Delta H}^{\text{val}}$ |
|----------|------------------|-------------------------|-----------------------------|------------------|-------------------------|-----------------------------|
| Carbon   |                  |                         |                             |                  |                         |                             |
| C=O      | 110              | 100                     | 95                          | 336              | 299                     | 198                         |
| Oxygen   |                  |                         |                             |                  |                         |                             |
| OR       | 89               | 82                      | 81                          | 278              | 239                     | 161                         |
| O=C      | 110              | 100                     | 95                          | 336              | 299                     | 198                         |
| OH       | 100              | 100                     | 58                          | 345              | 340                     | 76                          |
| Nitrogen |                  |                         |                             |                  |                         |                             |
| N_amn    | 100              | 88                      | 84                          | 88               | 73                      | 55                          |
| N_amd    | 17               | 12                      | 13                          | 13               | 7                       | 11                          |
| Hydrogen |                  |                         |                             |                  |                         |                             |
| HC       | 34               | 32                      | 28                          | 25               | 25                      | 11                          |

Table S.5: Representation of the different LJ-types in the molecules of the calibration and validation sets, including availability of experimental  $\rho_{\text{liq}}$  and  $\Delta H_{\text{vap}}$  values. The entries  $N^{\text{cal}}$ ,  $N_{\rho}^{\text{cal}}$  and  $N_{\Delta H}^{\text{cal}}$  provide numbers of molecules, of  $\rho_{\text{liq}}$  values and of  $\Delta H_{\text{vap}}$  values, respectively, in the calibration set ( $N_{\text{iso}}^{\text{cal}} = 339$  compounds depicted in Fig. S.1). The entries  $N^{\text{val}}$ ,  $N_{\rho}^{\text{val}}$  and  $N_{\Delta H}^{\text{val}}$  provide the corresponding information for the validation set ( $N_{\text{iso}}^{\text{val}} = 836$  compounds depicted in Fig. S.2). The values reported correspond to the number of molecules including at least one occurrence of the specific atom type. The LJ-types are those listed in Tab. 4, except for the (united-)atom aliphatic types CH0, CH1, CH2, CH3, and HB (not subject to optimization).

| Idx             | Atom type (EE-type) | $N^{\text{cal}}$ | $N_{\rho}^{\text{cal}}$ | $N_{\Delta H}^{\text{cal}}$ | $N^{\text{val}}$ | $N_{\rho}^{\text{val}}$ | $N_{\Delta H}^{\text{val}}$ |
|-----------------|---------------------|------------------|-------------------------|-----------------------------|------------------|-------------------------|-----------------------------|
| Ether           |                     |                  |                         |                             |                  |                         |                             |
| 5               | O_eth               | 46               | 43                      | 41                          | 108              | 93                      | 50                          |
| 6               | CH0_O_eth           | 6                | 6                       | 6                           | 23               | 14                      | 19                          |
| 7               | CH1_O_eth           | 18               | 14                      | 15                          | 35               | 30                      | 12                          |
| 8               | CH2_O_eth           | 28               | 26                      | 25                          | 92               | 81                      | 41                          |
| 9               | CH3_O_eth           | 33               | 30                      | 28                          | 25               | 19                      | 10                          |
| Aldehyde        |                     |                  |                         |                             |                  |                         |                             |
| 10              | H_CO_ald            | 19               | 18                      | 15                          | 21               | 21                      | 8                           |
| 11              | C_ald               | 19               | 18                      | 15                          | 21               | 21                      | 8                           |
| 12              | O_ald               | 19               | 18                      | 15                          | 21               | 21                      | 8                           |
| Ketone          |                     |                  |                         |                             |                  |                         |                             |
| 13              | C_ket               | 14               | 14                      | 14                          | 91               | 85                      | 57                          |
| 14              | O_ket               | 14               | 14                      | 14                          | 91               | 85                      | 57                          |
| Ester           |                     |                  |                         |                             |                  |                         |                             |
| 15              | H_CO_est            | 14               | 13                      | 12                          | 4                | 4                       | 3                           |
| 16              | C_est               | 43               | 39                      | 40                          | 170              | 146                     | 111                         |
| 17              | O_est               | 43               | 39                      | 40                          | 170              | 146                     | 111                         |
| 18              | O_R_est             | 43               | 39                      | 40                          | 170              | 146                     | 111                         |
| 19              | CH0_O_est           | 3                | 3                       | 2                           | 12               | 4                       | 10                          |
| 20              | CH1_O_est           | 9                | 7                       | 8                           | 32               | 29                      | 10                          |
| 21              | CH2_O_est           | 20               | 17                      | 20                          | 108              | 95                      | 82                          |
| 22              | CH3_O_est           | 14               | 12                      | 13                          | 22               | 20                      | 13                          |
| Alcohol         |                     |                  |                         |                             |                  |                         |                             |
| 23              | H_ol                | 83               | 83                      | 45                          | 304              | 300                     | 65                          |
| 24              | O_ol                | 83               | 83                      | 45                          | 304              | 300                     | 65                          |
| 25              | CH0_O_ol            | 15               | 15                      | 6                           | 109              | 109                     | 16                          |
| 26              | CH1_O_ol            | 42               | 42                      | 17                          | 116              | 115                     | 28                          |
| 27              | CH2_O_ol            | 53               | 53                      | 26                          | 109              | 105                     | 24                          |
| 28              | CH3_O_ol            | 1                | 1                       | 1                           | 0                | 0                       | 0                           |
| Carboxylic acid |                     |                  |                         |                             |                  |                         |                             |
| 29              | H_CO_acd            | 1                | 1                       | 1                           | 0                | 0                       | 0                           |
| 30              | C_acd               | 17               | 17                      | 13                          | 41               | 40                      | 11                          |
| 31              | O_acd               | 17               | 17                      | 13                          | 41               | 40                      | 11                          |
| 32              | H_O_acd             | 17               | 17                      | 13                          | 41               | 40                      | 11                          |
| 33              | O_H_acd             | 17               | 17                      | 13                          | 41               | 40                      | 11                          |
| Amine           |                     |                  |                         |                             |                  |                         |                             |
| 34              | H_N_amn             | 86               | 73                      | 70                          | 51               | 37                      | 32                          |
| 35              | N_amn               | 100              | 88                      | 84                          | 88               | 73                      | 55                          |
| 36              | CH0_N_amn           | 37               | 36                      | 32                          | 33               | 29                      | 18                          |
| 37              | CH1_N_amn           | 72               | 57                      | 62                          | 67               | 53                      | 47                          |
| 38              | CH2_N_amn           | 28               | 23                      | 24                          | 26               | 21                      | 13                          |
| 39              | CH3_N_amn           | 9                | 9                       | 7                           | 9                | 9                       | 4                           |
| Amide           |                     |                  |                         |                             |                  |                         |                             |
| 40              | H_N_amd             | 13               | 8                       | 11                          | 3                | 1                       | 3                           |
| 41              | C_amd               | 17               | 12                      | 13                          | 13               | 7                       | 11                          |
| 42              | O_amd               | 17               | 12                      | 13                          | 13               | 7                       | 11                          |
| 43              | N_amd               | 17               | 12                      | 13                          | 13               | 7                       | 11                          |
| 44              | CH0_N_amd           | 0                | 0                       | 0                           | 0                | 0                       | 0                           |
| 45              | CH1_N_amd           | 1                | 0                       | 1                           | 1                | 1                       | 1                           |
| 46              | CH2_N_amd           | 4                | 3                       | 4                           | 6                | 4                       | 5                           |
| 47              | CH3_N_amd           | 6                | 5                       | 4                           | 3                | 1                       | 2                           |

Table S.6: Representation of the different EE-types (or, equivalently, atom types) in the molecules of the calibration and validation sets, including availability of experimental  $\rho_{\text{liq}}$  and  $\Delta H_{\text{vap}}$  values. The entries  $N^{\text{cal}}$ ,  $N_{\rho}^{\text{cal}}$  and  $N_{\Delta H}^{\text{cal}}$  provide numbers of molecules, of  $\rho_{\text{liq}}$  values and of  $\Delta H_{\text{vap}}$  values, respectively, in the calibration set ( $N_{\text{iso}}^{\text{cal}} = 339$  compounds depicted in Fig. S.1). The entries  $N^{\text{val}}$ ,  $N_{\rho}^{\text{val}}$  and  $N_{\Delta H}^{\text{val}}$  provide the corresponding information for the validation set ( $N_{\text{iso}}^{\text{val}} = 836$  compounds depicted in Fig. S.2). The values reported correspond to the number of molecules including at least one occurrence of the specific atom type. The atom types (EE-types) are those listed in Tab. 3.

## S.6 Comparison of Experimental and Simulated Properties

In this section, we provide a detailed comparison between the experimental properties and their values calculated using the final (refined) force-field parameters listed in Main Article Tabs. 3 and 4, along with Tab. S.2. The experimental and simulated values are reported in Tab. S.7 for the  $N_{\text{sim}}^{\text{tot}} = 1405$  compounds/ $P, T$ -points ( $N_{\text{sim}}^{\text{cal}} = 408$ ,  $N_{\text{sim}}^{\text{val}} = 997$ ) considered in the simulations (Tab. S.1). Simulation results with errors larger than  $80.0 \text{ kg}\cdot\text{m}^{-3}$  for  $\rho_{\text{liq}}$  and/or larger than  $8.0 \text{ kJ}\cdot\text{mol}^{-1}$  for  $\Delta H_{\text{vap}}$  (62 simulations concerning 58 molecules) are marked as outliers, and are discussed specifically in Sec. S.7.

Table S.7: Experimental and simulated properties of the 1405 compounds/ $P, T$ -points considered in the simulations.

| $n_{sim}$ | $n_{iso}$ | Set | Code   | Outlier | $T_m$<br>[K] | $T_b$<br>[K] | $T$<br>[K] | $P$<br>[bar] | $\rho_{liq}[\text{kg}\cdot\text{m}^{-3}]$ |       |       |         | $\Delta H_{vap}[\text{kJ}\cdot\text{mol}^{-1}]$ |      |      |         |
|-----------|-----------|-----|--------|---------|--------------|--------------|------------|--------------|-------------------------------------------|-------|-------|---------|-------------------------------------------------|------|------|---------|
|           |           |     |        |         |              |              |            |              | exp                                       | sim   | dev   | err [%] | exp                                             | sim  | dev  | err [%] |
| 1         | 1         | C   | O2101a |         | 131.66       | 248.31       | 248.12     | 1.0          | 735.0                                     | 737.8 | 2.7   | 0.4     | 21.6                                            | 23.5 | 1.9  | 8.9     |
| 2         | 1         | C   | O2101b |         | 131.66       | 248.31       | 298.28     | 9.06         | 661.9                                     | 668.4 | 6.5   | 1.0     | -                                               | -    | -    | -       |
| 3         | 1         | C   | O2101c |         | 131.66       | 248.31       | 298.15     | 5.77         | -                                         | -     | -     | -       | 17.8                                            | 21.3 | 3.6  | 20.0    |
| 4         | 2         | C   | O3101a |         | 160.15       | 280.50       | 273.15     | 1.0          | 726.0                                     | 712.6 | -13.4 | -1.9    | -                                               | -    | -    | -       |
| 5         | 2         | C   | O3101b |         | 160.15       | 280.50       | 298.15     | 1.82         | 691.9                                     | 681.3 | -10.6 | -1.5    | -                                               | -    | -    | -       |
| 6         | 2         | C   | O3101c |         | 160.15       | 280.50       | 280.5      | 1.0          | -                                         | -     | -     | -       | 31.2                                            | 25.3 | -5.9 | -18.9   |
| 7         | 3         | C   | O4101a |         | -            | 303.92       | 298.15     | 1.0          | 709.0                                     | 679.7 | -29.3 | -4.1    | 26.4                                            | 26.6 | 0.2  | 0.9     |
| 8         | 4         | C   | O4102a |         | -            | 311.72       | 298.15     | 1.0          | 719.2                                     | 708.2 | -11.0 | -1.5    | 27.9                                            | 28.8 | 0.9  | 3.3     |
| 9         | 5         | C   | O4103a |         | 156.93       | 307.58       | 298.15     | 1.0          | 707.8                                     | 693.2 | -14.6 | -2.1    | 27.2                                            | 27.8 | 0.6  | 2.2     |
| 10        | 6         | C   | O5101a |         | 164.55       | 328.35       | 298.15     | 1.0          | 735.2                                     | 708.5 | -26.8 | -3.6    | 30.4                                            | 29.3 | -1.1 | -3.7    |
| 11        | 7         | C   | O5102a |         | -            | 331.70       | 298.15     | 1.0          | 727.2                                     | 714.4 | -12.8 | -1.8    | -                                               | -    | -    | -       |
| 12        | 7         | C   | O5102b |         | -            | 331.70       | 298.15     | 0.26         | -                                         | -     | -     | -       | 30.1                                            | 31.4 | 1.2  | 4.2     |
| 13        | 8         | C   | O5103a |         | -            | 332.15       | 298.15     | 1.0          | 736.7                                     | 717.1 | -19.6 | -2.7    | -                                               | -    | -    | -       |
| 14        | 8         | C   | O5103b |         | -            | 332.15       | 298.15     | 0.26         | -                                         | -     | -     | -       | 30.2                                            | 31.5 | 1.3  | 4.3     |
| 15        | 9         | C   | O5104a |         | -            | 326.15       | 298.15     | 1.0          | 717.3                                     | 694.9 | -22.4 | -3.1    | 30.0                                            | 30.2 | 0.2  | 0.6     |
| 16        | 10        | C   | O5105a |         | 157.45       | 343.35       | 298.15     | 1.0          | 739.4                                     | 729.3 | -10.1 | -1.4    | 32.5                                            | 33.6 | 1.1  | 3.2     |
| 17        | 11        | C   | O5106a |         | 145.65       | 337.01       | 298.15     | 1.0          | 727.0                                     | 713.3 | -13.7 | -1.9    | 31.4                                            | 32.1 | 0.7  | 2.1     |
| 18        | 12        | C   | O6101a |         | -            | 356.15       | 298.15     | 0.08         | 753.9                                     | 735.6 | -18.3 | -2.4    | -                                               | -    | -    | -       |
| 19        | 13        | C   | O6102a |         | -            | 359.45       | 298.15     | 1.0          | 765.9                                     | 747.7 | -18.2 | -2.4    | 35.0                                            | 34.4 | -0.6 | -1.6    |
| 20        | 14        | C   | O6103a |         | 179.15       | 345.95       | 298.15     | 1.0          | 735.2                                     | 724.4 | -10.8 | -1.5    | 33.1                                            | 34.0 | 0.9  | 2.9     |
| 21        | 15        | C   | O6104a |         | -            | 356.15       | 298.15     | 1.0          | 754.2                                     | 738.6 | -15.6 | -2.1    | -                                               | -    | -    | -       |
| 22        | 16        | C   | O6105a |         | 187.78       | 341.45       | 298.15     | 1.0          | 718.7                                     | 698.3 | -20.4 | -2.8    | 32.7                                            | 31.6 | -1.1 | -3.3    |
| 23        | 17        | C   | O6106a |         | -            | 363.15       | 298.15     | 0.07         | 746.1                                     | 742.6 | -3.4  | -0.5    | -                                               | -    | -    | -       |
| 24        | 18        | C   | O6107a |         | -            | 361.15       | 298.15     | 0.07         | 749.0                                     | 742.4 | -6.5  | -0.9    | -                                               | -    | -    | -       |
| 25        | 19        | C   | O6108a |         | -            | 363.15       | 298.15     | 1.0          | 749.0                                     | 738.2 | -10.9 | -1.4    | -                                               | -    | -    | -       |
| 26        | 19        | C   | O6108b |         | -            | 363.15       | 298.15     | 0.07         | -                                         | -     | -     | -       | 35.5                                            | 36.6 | 1.1  | 3.1     |
| 27        | 20        | C   | O6109a |         | -            | 354.25       | 298.15     | 1.0          | 734.0                                     | 716.8 | -17.2 | -2.4    | -                                               | -    | -    | -       |
| 28        | 20        | C   | O6109b |         | -            | 354.25       | 298.15     | 0.1          | -                                         | -     | -     | -       | 33.6                                            | 34.4 | 0.8  | 2.4     |
| 29        | 21        | C   | O6110a |         | -            | 364.15       | 298.15     | 0.06         | 749.9                                     | 736.2 | -13.7 | -1.8    | 35.6                                            | 36.2 | 0.6  | 1.8     |
| 30        | 22        | C   | O6111a |         | -            | 354.35       | 298.15     | 1.0          | 738.3                                     | 723.2 | -15.1 | -2.0    | -                                               | -    | -    | -       |
| 31        | 22        | C   | O6111b |         | -            | 354.35       | 298.15     | 0.11         | -                                         | -     | -     | -       | 32.6                                            | 34.9 | 2.2  | 6.8     |
| 32        | 23        | C   | O6112a |         | -            | 353.15       | 298.15     | 1.0          | 732.4                                     | 710.6 | -21.8 | -3.0    | -                                               | -    | -    | -       |
| 33        | 23        | C   | O6112b |         | -            | 353.15       | 298.15     | 0.09         | -                                         | -     | -     | -       | 34.0                                            | 34.2 | 0.2  | 0.6     |
| 34        | 24        | C   | O6113a |         | -            | 372.15       | 298.15     | 1.0          | 755.2                                     | 744.7 | -10.5 | -1.4    | -                                               | -    | -    | -       |
| 35        | 24        | C   | O6113b |         | -            | 372.15       | 298.15     | 0.04         | -                                         | -     | -     | -       | 36.4                                            | 38.3 | 1.8  | 5.0     |
| 36        | 25        | C   | O6114a |         | 149.15       | 365.35       | 298.15     | 1.0          | 744.7                                     | 730.2 | -14.5 | -1.9    | 36.3                                            | 36.8 | 0.5  | 1.2     |
| 37        | 26        | C   | O6115a |         | 158.35       | 362.79       | 298.15     | 1.0          | 741.9                                     | 727.0 | -14.9 | -2.0    | 35.7                                            | 36.2 | 0.6  | 1.5     |
| 38        | 27        | C   | O3201a |         | 168.04       | 315.00       | 298.15     | 0.51         | 854.1                                     | 820.5 | -33.6 | -3.9    | -                                               | -    | -    | -       |
| 39        | 27        | C   | O3201b |         | 168.04       | 315.00       | 298.0      | 1.0          | -                                         | -     | -     | -       | 28.9                                            | 27.2 | -1.7 | -5.9    |
| 40        | 28        | C   | O4201a |         | 159.95       | 337.65       | 293.15     | 1.0          | 851.6                                     | 791.8 | -59.8 | -7.0    | 36.4                                            | 29.8 | -6.6 | -18.2   |
| 41        | 29        | C   | O4202a |         | 204.15       | 357.20       | 298.15     | 1.01         | 861.4                                     | 843.2 | -18.1 | -2.1    | 36.8                                            | 36.8 | 0.0  | 0.1     |
| 42        | 30        | C   | O5201a |         | 226.15       | 356.15       | 298.15     | 1.01         | 845.1                                     | 805.9 | -39.2 | -4.6    | 37.6                                            | 35.0 | -2.6 | -7.0    |
| 43        | 31        | C   | O5202a |         | -            | 369.05       | 369.05     | 1.0          | -                                         | -     | -     | -       | 31.5                                            | 32.0 | 0.5  | 1.7     |
| 44        | 32        | C   | O5203a |         | -            | 359.15       | 293.15     | 1.0          | 864.8                                     | 802.7 | -62.1 | -7.2    | -                                               | -    | -    | -       |
| 45        | 32        | C   | O5203b |         | -            | 359.15       | 359.15     | 1.0          | -                                         | -     | -     | -       | 30.5                                            | 30.4 | -0.1 | -0.3    |
| 46        | 33        | C   | O5204a |         | -            | 375.25       | 298.15     | 1.0          | 846.0                                     | 824.4 | -21.6 | -2.5    | 39.8                                            | 39.6 | -0.2 | -0.4    |

Table S.7 – Comparison of experimental and simulated properties (continued)

| $n_{\text{sim}}$ | $n_{\text{iso}}$ | Set | Outlier | code | $T_m$<br>[K] | $T_b$<br>[K] | T<br>[K] | P<br>[bar] | $\rho_{\text{liq}}[\text{kg}\cdot\text{m}^{-3}]$ |        |       |         | $\Delta H_{\text{vap}}[\text{kJ}\cdot\text{mol}^{-1}]$ |      |      |         |
|------------------|------------------|-----|---------|------|--------------|--------------|----------|------------|--------------------------------------------------|--------|-------|---------|--------------------------------------------------------|------|------|---------|
|                  |                  |     |         |      |              |              |          |            | exp                                              | sim    | dev   | err [%] | exp                                                    | sim  | dev  | err [%] |
| 47               | 34               | C   | O5205a  |      | 207.15       | 361.15       | 298.15   | 1.0        | 825.2                                            | 790.2  | -34.9 | -4.2    | 35.7                                                   | 33.7 | -2.0 | -5.7    |
| 48               | 35               | C   | O6201a  |      | -            | -            | 293.15   | 1.0        | 844.6                                            | 815.4  | -29.2 | -3.5    | -                                                      | -    | -    | -       |
| 49               | 36               | C   | O6203a  |      | -            | -            | 317.0    | 1.0        | -                                                | -      | -     | -       | 41.2                                                   | 37.5 | -3.7 | -9.0    |
| 50               | 37               | C   | O6204a  |      | 167.05       | 376.75       | 298.15   | 1.01       | 822.0                                            | 778.0  | -44.0 | -5.3    | 39.6                                                   | 36.4 | -3.2 | -8.2    |
| 51               | 38               | C   | O6205a  |      | -            | -            | 298.15   | 1.0        | 852.9                                            | 837.1  | -15.8 | -1.9    | -                                                      | -    | -    | -       |
| 52               | 39               | C   | O6206a  |      | -            | -            | 340.0    | 1.0        | -                                                | -      | -     | -       | 38.6                                                   | 36.4 | -2.2 | -5.6    |
| 53               | 40               | C   | O6207a  |      | 199.15       | 392.55       | 298.15   | 1.0        | 836.2                                            | 811.8  | -24.4 | -2.9    | 43.2                                                   | 43.1 | -0.1 | -0.2    |
| 54               | 41               | C   | O4301a  |      | 288.15       | 377.15       | 293.15   | 1.0        | 967.6                                            | 899.6  | -68.0 | -7.0    | 38.1                                                   | 38.1 | 0.0  | 0.0     |
| 55               | 42               | C   | O5301a  |      | -            | 381.15       | 298.15   | 1.0        | 943.8                                            | 892.3  | -51.5 | -5.5    | -                                                      | -    | -    | -       |
| 56               | 42               | C   | O5301b  |      | -            | 381.15       | 381.15   | 1.0        | -                                                | -      | -     | -       | 32.6                                                   | 35.4 | 2.8  | 8.7     |
| 57               | 43               | C   | O6302a  |      | -            | 421.15       | 421.15   | 1.0        | -                                                | -      | -     | -       | 36.4                                                   | 40.3 | 4.0  | 10.8    |
| 58               | 44               | C   | O6304a  |      | 209.15       | 432.91       | 298.15   | 1.0        | 939.2                                            | 913.2  | -26.0 | -2.8    | 48.0                                                   | 53.1 | 5.1  | 10.7    |
| 59               | 45               | C   | O5401a  |      | 270.65       | 387.15       | 298.15   | 1.0        | 1023.0                                           | 958.8  | -64.2 | -6.3    | -                                                      | -    | -    | -       |
| 60               | 45               | C   | O5401b  |      | 270.65       | 387.15       | 319.0    | 1.0        | -                                                | -      | -     | -       | 41.2                                                   | 41.5 | 0.3  | 0.8     |
| 61               | 46               | C   | O6401a  |      | -            | -            | 366.0    | 1.0        | -                                                | -      | -     | -       | 42.9                                                   | 43.7 | 0.8  | 1.9     |
| 62               | 47               | C   | A1101a  |      | 181.15       | 254.05       | 250.68   | 1.36       | 805.2                                            | 884.0  | 78.9  | 9.8     | -                                                      | -    | -    | -       |
| 63               | 47               | C   | A1101b  |      | 181.15       | 254.05       | 293.15   | 1.0        | 814.0                                            | 811.5  | -2.5  | -0.3    | -                                                      | -    | -    | -       |
| 64               | 47               | C   | A1101c  |      | 181.15       | 254.05       | 254.05   | 1.0        | -                                                | -      | -     | -       | 23.2                                                   | 25.6 | 2.4  | 10.4    |
| 65               | 48               | C   | A2101a  |      | 149.75       | 293.55       | 298.15   | 1.0        | 772.0                                            | 779.5  | 7.5   | 1.0     | 26.9                                                   | 26.5 | -0.4 | -1.6    |
| 66               | 49               | C   | A3101a  |      | 193.15       | 321.15       | 298.15   | 1.0        | 791.2                                            | 772.7  | -18.5 | -2.3    | 29.6                                                   | 29.7 | 0.1  | 0.2     |
| 67               | 50               | C   | A4101a  |      | 201.05       | 337.25       | 298.15   | 1.0        | 796.6                                            | 752.1  | -44.5 | -5.6    | 32.3                                                   | 31.0 | -1.3 | -4.0    |
| 68               | 51               | C   | A4102a  |      | 176.29       | 347.95       | 298.15   | 1.0        | 796.6                                            | 785.7  | -10.9 | -1.4    | 33.7                                                   | 34.2 | 0.5  | 1.6     |
| 69               | 52               | C   | A5101a  |      | 274.15       | 347.15       | 298.15   | 0.14       | 783.1                                            | 765.2  | -17.9 | -2.3    | -                                                      | -    | -    | -       |
| 70               | 52               | C   | A5101b  |      | 274.15       | 347.15       | 322.0    | 1.0        | -                                                | -      | -     | -       | 34.2                                                   | 30.8 | -3.5 | -10.1   |
| 71               | 53               | C   | A5102a  |      | -            | 365.15       | 298.15   | 0.06       | 804.1                                            | 778.2  | -25.9 | -3.2    | 34.8                                                   | 35.9 | 1.2  | 3.4     |
| 72               | 54               | C   | A5103a  |      | 222.15       | 365.75       | 298.15   | 1.0        | 794.2                                            | 783.2  | -11.0 | -1.4    | -                                                      | -    | -    | -       |
| 73               | 54               | C   | A5103b  |      | 222.15       | 365.75       | 298.15   | 0.06       | -                                                | -      | -     | -       | 34.8                                                   | 36.6 | 1.8  | 5.2     |
| 74               | 55               | C   | A5104a  |      | 191.65       | 376.15       | 298.15   | 1.0        | 806.2                                            | 795.4  | -10.8 | -1.3    | 38.1                                                   | 39.0 | 0.9  | 2.4     |
| 75               | 56               | C   | A6101a  |      | -            | 377.15       | 298.15   | 0.03       | 801.0                                            | 797.5  | -3.6  | -0.4    | 36.2                                                   | 37.2 | 1.0  | 2.8     |
| 76               | 57               | C   | A6103a  |      | -            | 386.15       | 298.15   | 1.0        | 809.7                                            | 791.4  | -18.3 | -2.3    | -                                                      | -    | -    | -       |
| 77               | 58               | C   | A6104a  |      | -            | 389.95       | 298.15   | 0.02       | 814.1                                            | 796.5  | -17.6 | -2.2    | 38.6                                                   | 40.7 | 2.1  | 5.4     |
| 78               | 59               | C   | A6105a  |      | -            | 390.15       | 298.15   | 0.02       | 808.0                                            | 789.5  | -18.6 | -2.3    | 38.8                                                   | 40.7 | 1.9  | 5.0     |
| 79               | 60               | C   | A6106a  |      | -            | 395.15       | 299.47   | 0.01       | 806.6                                            | 801.5  | -5.1  | -0.6    | -                                                      | -    | -    | -       |
| 80               | 61               | C   | A6108a  |      | 214.95       | 401.45       | 298.15   | 1.01       | 833.1                                            | 801.8  | -31.3 | -3.8    | 42.3                                                   | 43.7 | 1.4  | 3.4     |
| 81               | 62               | C   | A4201a  |      | -            | 443.15       | 293.15   | 1.0        | 1065.0                                           | 1009.4 | -55.6 | -5.2    | -                                                      | -    | -    | -       |
| 82               | 63               | C   | A5201b  |      | 259.15       | 461.15       | 342.0    | 1.0        | -                                                | -      | -     | -       | 56.2                                                   | 53.7 | -2.5 | -4.5    |
| 83               | 64               | C   | A6201a  | ×    | -            | 439.15       | 439.15   | 1.0        | -                                                | -      | -     | -       | 38.1                                                   | 48.1 | 10.1 | 26.4    |
| 84               | 65               | C   | A6202a  |      | 265.15       | 435.22       | 292.15   | 1.0        | 1003.0                                           | 959.1  | -43.9 | -4.4    | -                                                      | -    | -    | -       |
| 85               | 66               | C   | K3101a  |      | 178.25       | 329.44       | 298.15   | 1.0        | 784.4                                            | 803.1  | 18.7  | 2.4     | 31.3                                                   | 31.5 | 0.2  | 0.5     |
| 86               | 67               | C   | K4101a  |      | 186.48       | 352.79       | 298.15   | 1.0        | 799.9                                            | 793.8  | -6.2  | -0.8    | 34.5                                                   | 34.2 | -0.3 | -1.0    |
| 87               | 68               | C   | K5101a  |      | 180.02       | 367.55       | 298.15   | 1.0        | 809.4                                            | 781.8  | -27.6 | -3.4    | 36.8                                                   | 35.8 | -1.0 | -2.6    |
| 88               | 69               | C   | K5102a  |      | 234.17       | 375.14       | 298.15   | 1.0        | 809.6                                            | 789.1  | -20.5 | -2.5    | 38.5                                                   | 37.1 | -1.4 | -3.7    |
| 89               | 70               | C   | K5103a  |      | 196.32       | 375.46       | 298.15   | 1.0        | 801.8                                            | 799.3  | -2.5  | -0.3    | 38.3                                                   | 38.8 | 0.5  | 1.2     |
| 90               | 71               | C   | K6101a  |      | 221.75       | 379.25       | 298.15   | 1.0        | 804.3                                            | 803.6  | -0.7  | -0.1    | 38.3                                                   | 37.3 | -1.0 | -2.5    |
| 91               | 72               | C   | K6102a  |      | -            | 386.55       | 298.15   | 1.0        | 806.6                                            | 782.4  | -24.2 | -3.0    | 39.8                                                   | 39.0 | -0.8 | -2.0    |
| 92               | 73               | C   | K6103a  |      | -            | 390.55       | 298.15   | 1.0        | 808.3                                            | 799.2  | -9.1  | -1.1    | 39.8                                                   | 40.6 | 0.8  | 1.9     |
| 93               | 74               | C   | K6104a  |      | 188.15       | 389.65       | 298.15   | 1.0        | 796.3                                            | 795.1  | -1.2  | -0.2    | 41.0                                                   | 40.9 | -0.1 | -0.2    |
| 94               | 75               | C   | K6105a  |      | 217.75       | 396.65       | 298.15   | 1.0        | 811.1                                            | 794.3  | -16.8 | -2.1    | 40.6                                                   | 41.7 | 1.1  | 2.7     |

Table S.7 – Comparison of experimental and simulated properties (continued)

| $n_{\text{sim}}$ | $n_{\text{iso}}$ | Set | Outlier | code | $T_m$<br>[K] | $T_b$<br>[K] | $T$<br>[K] | $P$<br>[bar] | $\rho_{\text{liq}}[\text{kg}\cdot\text{m}^{-3}]$ |        |       |         | $\Delta H_{\text{vap}}[\text{kJ}\cdot\text{mol}^{-1}]$ |      |       |         |
|------------------|------------------|-----|---------|------|--------------|--------------|------------|--------------|--------------------------------------------------|--------|-------|---------|--------------------------------------------------------|------|-------|---------|
|                  |                  |     |         |      |              |              |            |              | exp                                              | sim    | dev   | err [%] | exp                                                    | sim  | dev   | err [%] |
| 95               | 76               | C   | K6106a  |      | 217.70       | 400.85       | 298.15     | 1.0          | 807.1                                            | 804.4  | -2.7  | -0.3    | 42.2                                                   | 43.4 | 1.2   | 2.9     |
| 96               | 77               | C   | K6201a  |      | -            | 444.65       | 332.77     | 0.01         | 946.8                                            | 921.7  | -25.1 | -2.6    | 46.8                                                   | 50.7 | 3.9   | 8.4     |
| 97               | 78               | C   | K6204a  |      | -            | 433.15       | 293.15     | 1.0          | 959.0                                            | 949.0  | -10.0 | -1.0    | -                                                      | -    | -     | -       |
| 98               | 78               | C   | K6204b  |      | -            | 433.15       | 323.57     | 0.01         | -                                                | -      | -     | -       | 44.2                                                   | 52.0 | 7.8   | 17.7    |
| 99               | 79               | C   | K6205a  |      | 267.65       | 467.15       | 350.77     | 0.01         | 884.6                                            | 918.2  | 33.5  | 3.8     | -                                                      | -    | -     | -       |
| 100              | 79               | C   | K6205b  |      | 267.65       | 467.15       | 401.0      | 1.0          | -                                                | -      | -     | -       | 50.1                                                   | 50.6 | 0.5   | 1.0     |
| 101              | 80               | C   | E3201a  |      | 174.95       | 330.09       | 298.15     | 1.01         | 927.5                                            | 914.7  | -12.8 | -1.4    | 32.3                                                   | 32.9 | 0.6   | 1.9     |
| 102              | 81               | C   | E4201a  |      | 185.65       | 352.60       | 298.15     | 1.0          | 909.1                                            | 880.9  | -28.2 | -3.1    | 35.7                                                   | 35.7 | 0.0   | 0.1     |
| 103              | 82               | C   | E4202a  |      | 189.35       | 350.21       | 298.15     | 1.0          | 894.3                                            | 873.4  | -20.9 | -2.3    | 35.1                                                   | 35.3 | 0.2   | 0.6     |
| 104              | 83               | C   | E5201a  |      | 188.55       | 365.65       | 298.15     | 1.0          | 883.3                                            | 849.3  | -34.0 | -3.9    | 37.3                                                   | 37.3 | -0.0  | -0.1    |
| 105              | 84               | C   | E5202a  |      | 199.75       | 361.65       | 298.15     | 1.0          | 869.0                                            | 844.3  | -24.7 | -2.8    | 37.0                                                   | 37.1 | 0.1   | 0.3     |
| 106              | 85               | C   | E5203a  |      | 187.35       | 375.90       | 298.15     | 1.01         | 892.5                                            | 871.4  | -21.2 | -2.4    | 39.8                                                   | 40.1 | 0.3   | 0.7     |
| 107              | 86               | C   | E5204a  |      | 199.55       | 372.25       | 298.15     | 1.0          | 884.0                                            | 851.8  | -32.2 | -3.6    | 39.3                                                   | 38.1 | -1.2  | -3.0    |
| 108              | 87               | C   | E5205a  |      | 180.15       | 374.65       | 298.15     | 1.01         | 882.8                                            | 863.3  | -19.5 | -2.2    | 39.1                                                   | 39.3 | 0.2   | 0.6     |
| 109              | 88               | C   | E6201a  |      | -            | 374.25       | 293.15     | 1.0          | 850.0                                            | 860.7  | 10.7  | 1.3     | 38.8                                                   | 38.8 | 0.0   | 0.0     |
| 110              | 89               | C   | E6202a  |      | -            | 369.15       | 298.15     | 1.0          | 861.6                                            | 845.1  | -16.4 | -1.9    | 38.0                                                   | 38.4 | 0.4   | 1.1     |
| 111              | 90               | C   | E6203a  |      | -            | -            | 293.15     | 1.0          | 884.7                                            | 861.0  | -23.7 | -2.7    | -                                                      | -    | -     | -       |
| 112              | 91               | C   | E6204a  |      | 175.35       | 383.00       | 298.15     | 1.0          | 864.0                                            | 828.3  | -35.8 | -4.1    | 39.8                                                   | 39.6 | -0.1  | -0.4    |
| 113              | 92               | C   | E6205a  |      | -            | 389.65       | 298.15     | 1.0          | 875.9                                            | 856.6  | -19.3 | -2.2    | -                                                      | -    | -     | -       |
| 114              | 92               | C   | E6205b  |      | -            | 389.65       | 298.15     | 0.02         | -                                                | -      | -     | -       | 39.4                                                   | 42.3 | 2.9   | 7.3     |
| 115              | 93               | C   | E6206a  |      | -            | 383.15       | 298.15     | 1.0          | 860.1                                            | 828.8  | -31.3 | -3.6    | -                                                      | -    | -     | -       |
| 116              | 93               | C   | E6206b  |      | -            | 383.15       | 298.15     | 0.03         | -                                                | -      | -     | -       | 38.4                                                   | 39.8 | 1.4   | 3.5     |
| 117              | 94               | C   | E6207a  |      | 176.05       | 389.80       | 298.15     | 1.0          | 866.3                                            | 845.2  | -21.1 | -2.4    | -                                                      | -    | -     | -       |
| 118              | 94               | C   | E6207b  |      | 176.05       | 389.80       | 298.15     | 0.02         | -                                                | -      | -     | -       | 39.5                                                   | 41.6 | 2.1   | 5.3     |
| 119              | 95               | C   | E6208a  |      | 174.25       | 385.15       | 298.15     | 1.0          | 866.0                                            | 848.9  | -17.2 | -2.0    | 40.7                                                   | 41.4 | 0.7   | 1.6     |
| 120              | 96               | C   | E6209a  |      | -            | 400.55       | 298.15     | 1.0          | 885.2                                            | 867.1  | -18.1 | -2.0    | 43.7                                                   | 44.9 | 1.1   | 2.6     |
| 121              | 97               | C   | E6210a  |      | 176.15       | 394.65       | 298.15     | 1.0          | 873.8                                            | 847.7  | -26.1 | -3.0    | 42.0                                                   | 42.6 | 0.6   | 1.3     |
| 122              | 98               | C   | E6211a  |      | 197.25       | 395.65       | 298.15     | 1.0          | 876.4                                            | 845.0  | -31.4 | -3.6    | 43.2                                                   | 42.1 | -1.1  | -2.5    |
| 123              | 99               | C   | E6212a  |      | 196.15       | 399.15       | 298.15     | 1.0          | 876.4                                            | 860.1  | -16.2 | -1.9    | 42.7                                                   | 44.0 | 1.4   | 3.2     |
| 124              | 100              | C   | E5402a  |      | 211.15       | 454.55       | 298.15     | 1.0          | 1146.7                                           | 1103.6 | -43.1 | -3.8    | 57.5                                                   | 57.2 | -0.3  | -0.6    |
| 125              | 101              | C   | E5403a  |      | -            | 437.65       | 298.15     | 1.0          | 1135.5                                           | 1083.3 | -52.2 | -4.6    | 56.4                                                   | 55.0 | -1.4  | -2.5    |
| 126              | 102              | C   | E6401a  |      | -            | 447.15       | 298.15     | 1.0          | 1093.6                                           | 1048.9 | -44.8 | -4.1    | -                                                      | -    | -     | -       |
| 127              | 102              | C   | E6401b  |      | -            | 447.15       | 293.0      | 1.0          | -                                                | -      | -     | -       | 57.8                                                   | 59.3 | 1.5   | 2.5     |
| 128              | 103              | C   | E6402a  |      | -            | -            | 352.0      | 1.0          | -                                                | -      | -     | -       | 52.9                                                   | 52.3 | -0.6  | -1.2    |
| 129              | 104              | C   | E6403a  |      | 292.05       | 442.15       | 298.15     | 1.0          | 1070.0                                           | 1022.6 | -47.4 | -4.4    | 59.0                                                   | 54.7 | -4.3  | -7.3    |
| 130              | 105              | C   | E6405a  |      | 291.75       | 469.55       | 298.15     | 1.0          | 1114.0                                           | 1068.2 | -45.9 | -4.1    | 60.9                                                   | 61.7 | 0.8   | 1.4     |
| 131              | 106              | C   | E6406a  | ×    | -            | -            | 350.0      | 1.0          | -                                                | -      | -     | -       | 68.0                                                   | 57.1 | -10.9 | -16.0   |
| 132              | 107              | C   | E6407a  | ×    | -            | 452.15       | 452.15     | 1.0          | -                                                | -      | -     | -       | 39.3                                                   | 47.6 | 8.3   | 21.1    |
| 133              | 108              | C   | E6408a  |      | 242.15       | 463.65       | 298.15     | 1.0          | 1098.7                                           | 1060.5 | -38.2 | -3.5    | 61.0                                                   | 63.1 | 2.1   | 3.4     |
| 134              | 109              | C   | F2201a  |      | 173.45       | 304.90       | 298.15     | 1.0          | 966.8                                            | 948.2  | -18.6 | -1.9    | 28.4                                                   | 28.4 | -0.1  | -0.2    |
| 135              | 110              | C   | F3201a  |      | 193.55       | 327.46       | 298.15     | 1.0          | 915.9                                            | 896.8  | -19.1 | -2.1    | 31.5                                                   | 30.7 | -0.8  | -2.4    |
| 136              | 111              | C   | F4201a  |      | -            | 341.25       | 298.15     | 0.17         | 870.2                                            | 856.5  | -13.8 | -1.6    | 31.6                                                   | 34.2 | 2.6   | 8.4     |
| 137              | 112              | C   | F4202a  |      | 180.25       | 353.97       | 298.15     | 1.0          | 899.9                                            | 882.0  | -17.9 | -2.0    | 36.6                                                   | 34.9 | -1.7  | -4.5    |
| 138              | 113              | C   | F5201a  |      | -            | 355.95       | 298.15     | 0.09         | 871.9                                            | 862.2  | -9.7  | -1.1    | 33.6                                                   | 36.4 | 2.8   | 8.3     |
| 139              | 114              | C   | F5202a  |      | 177.65       | 371.22       | 298.15     | 1.0          | 875.7                                            | 865.7  | -10.0 | -1.1    | -                                                      | -    | -     | -       |
| 140              | 114              | C   | F5202b  |      | 177.65       | 371.22       | 298.15     | 0.05         | -                                                | -      | -     | -       | 36.1                                                   | 37.6 | 1.4   | 4.0     |
| 141              | 115              | C   | F5203a  |      | -            | 363.55       | 298.15     | 0.06         | 878.6                                            | 869.2  | -9.4  | -1.1    | 36.8                                                   | 37.1 | 0.3   | 0.8     |
| 142              | 116              | C   | F5204a  |      | 183.15       | 379.25       | 298.15     | 1.0          | 887.6                                            | 878.6  | -9.0  | -1.0    | 40.5                                                   | 39.5 | -1.0  | -2.4    |

Table S.7 – Comparison of experimental and simulated properties (continued)

| $n_{\text{sim}}$ | $n_{\text{iso}}$ | Set | Outlier | code | $T_m$<br>[K] | $T_b$<br>[K] | $T$<br>[K] | $P$<br>[bar] | $\rho_{\text{liq}}[\text{kg}\cdot\text{m}^{-3}]$ |        |       |         | $\Delta H_{\text{vap}}[\text{kJ}\cdot\text{mol}^{-1}]$ |      |      |         |
|------------------|------------------|-----|---------|------|--------------|--------------|------------|--------------|--------------------------------------------------|--------|-------|---------|--------------------------------------------------------|------|------|---------|
|                  |                  |     |         |      |              |              |            |              | exp                                              | sim    | dev   | err [%] | exp                                                    | sim  | dev  | err [%] |
| 143              | 117              | C   | F6202a  |      | -            | 385.65       | 298.15     | 0.02         | 883.7                                            | 878.8  | -4.9  | -0.6    | -                                                      | -    | -    | -       |
| 144              | 118              | C   | F6205a  |      | -            | 393.76       | 298.15     | 0.02         | 874.3                                            | 868.6  | -5.6  | -0.6    | -                                                      | -    | -    | -       |
| 145              | 119              | C   | F6206a  |      | 179.65       | 397.15       | 298.15     | 1.0          | 877.0                                            | 867.9  | -9.2  | -1.0    | -                                                      | -    | -    | -       |
| 146              | 119              | C   | F6206b  |      | 179.65       | 397.15       | 298.85     | 0.01         | -                                                | -      | -     | -       | 40.8                                                   | 42.5 | 1.7  | 4.2     |
| 147              | 120              | C   | F6208a  |      | 200.15       | 406.60       | 298.15     | 1.0          | 880.4                                            | 872.0  | -8.4  | -0.9    | 45.2                                                   | 44.4 | -0.8 | -1.8    |
| 148              | 121              | C   | F4401a  |      | -            | 447.15       | 273.15     | 1.0          | 1193.0                                           | 1185.5 | -7.5  | -0.6    | -                                                      | -    | -    | -       |
| 149              | 121              | C   | F4401b  |      | -            | 447.15       | 447.15     | 1.0          | -                                                | -      | -     | -       | 38.8                                                   | 45.9 | 7.0  | 18.1    |
| 150              | 122              | C   | F5401a  | ×    | -            | 348.15       | 348.15     | 1.0          | -                                                | -      | -     | -       | 29.5                                                   | 53.4 | 23.9 | 81.1    |
| 151              | 123              | C   | L1101a  | ×    | 175.65       | 337.85       | 298.15     | 1.01         | 786.7                                            | 885.0  | 98.3  | 12.5    | 37.7                                                   | 42.0 | 4.3  | 11.4    |
| 152              | 124              | C   | L2101a  |      | 159.01       | 351.44       | 298.15     | 1.01         | 786.6                                            | 804.9  | 18.3  | 2.3     | 42.3                                                   | 43.1 | 0.9  | 2.0     |
| 153              | 125              | C   | L3101a  |      | 185.24       | 355.41       | 298.15     | 1.0          | 781.2                                            | 733.2  | -48.0 | -6.1    | 44.4                                                   | 43.6 | -0.8 | -1.9    |
| 154              | 126              | C   | L3102a  |      | 148.76       | 370.35       | 298.15     | 1.0          | 799.8                                            | 796.0  | -3.8  | -0.5    | 46.6                                                   | 46.6 | 0.0  | 0.0     |
| 155              | 127              | C   | L4101a  |      | 298.96       | 355.57       | 299.15     | 1.0          | 779.5                                            | 736.2  | -43.3 | -5.5    | 46.2                                                   | 44.9 | -1.3 | -2.8    |
| 156              | 128              | C   | L4102a  |      | 171.19       | 380.81       | 298.15     | 1.0          | 797.8                                            | 781.4  | -16.4 | -2.1    | 50.8                                                   | 48.2 | -2.6 | -5.0    |
| 157              | 129              | C   | L4103a  |      | 184.71       | 372.70       | 298.15     | 1.01         | 803.0                                            | 760.0  | -43.0 | -5.4    | 48.5                                                   | 48.4 | -0.1 | -0.2    |
| 158              | 130              | C   | L4104a  |      | 184.55       | 390.81       | 298.15     | 1.0          | 805.8                                            | 799.9  | -5.9  | -0.7    | 52.1                                                   | 51.4 | -0.7 | -1.4    |
| 159              | 131              | C   | L5101a  |      | 328.15       | 386.25       | 327.15     | 0.08         | 780.0                                            | 770.7  | -9.3  | -1.2    | -                                                      | -    | -    | -       |
| 160              | 131              | C   | L5101b  |      | 328.15       | 386.25       | 345.0      | 1.0          | -                                                | -      | -     | -       | 47.5                                                   | 43.7 | -3.8 | -8.1    |
| 161              | 132              | C   | L5102a  |      | 264.45       | 375.15       | 298.15     | 1.0          | 804.7                                            | 777.6  | -27.1 | -3.4    | 50.1                                                   | 50.2 | 0.1  | 0.2     |
| 162              | 133              | C   | L5103a  |      | -            | 384.65       | 298.15     | 1.0          | 815.0                                            | 773.1  | -41.9 | -5.1    | -                                                      | -    | -    | -       |
| 163              | 134              | C   | L5104a  |      | -            | 401.85       | 298.15     | 1.0          | 815.2                                            | 801.0  | -14.2 | -1.8    | 54.1                                                   | 53.3 | -0.8 | -1.4    |
| 164              | 135              | C   | L5105a  |      | 203.25       | 388.45       | 298.15     | 1.0          | 815.4                                            | 779.1  | -36.3 | -4.5    | 52.9                                                   | 53.6 | 0.8  | 1.4     |
| 165              | 136              | C   | L5106a  |      | 155.95       | 404.35       | 298.15     | 1.0          | 806.9                                            | 796.3  | -10.6 | -1.3    | 55.3                                                   | 54.5 | -0.8 | -1.5    |
| 166              | 137              | C   | L5107a  |      | 200.15       | 392.15       | 298.15     | 1.01         | 805.3                                            | 773.2  | -32.1 | -4.0    | 53.6                                                   | 53.5 | -0.1 | -0.1    |
| 167              | 138              | C   | L5108a  |      | 195.57       | 410.95       | 298.15     | 1.0          | 811.3                                            | 803.9  | -7.5  | -0.9    | 56.9                                                   | 56.0 | -0.9 | -1.5    |
| 168              | 139              | C   | L6101a  |      | -            | 393.15       | 298.15     | 0.01         | 813.9                                            | 808.3  | -5.6  | -0.7    | -                                                      | -    | -    | -       |
| 169              | 139              | C   | L6101b  |      | -            | 393.15       | 298.0      | 1.0          | -                                                | -      | -     | -       | 53.8                                                   | 54.1 | 0.3  | 0.5     |
| 170              | 140              | C   | L6102a  |      | 262.65       | 391.75       | 298.15     | 1.0          | 818.6                                            | 807.9  | -10.7 | -1.3    | 54.0                                                   | 54.2 | 0.2  | 0.3     |
| 171              | 141              | C   | L6103a  |      | -            | 409.95       | 298.15     | 1.0          | 824.5                                            | 822.3  | -2.2  | -0.3    | -                                                      | -    | -    | -       |
| 172              | 141              | C   | L6103b  |      | -            | 409.95       | 313.0      | 1.0          | -                                                | -      | -     | -       | 52.1                                                   | 53.0 | 0.9  | 1.7     |
| 173              | 142              | C   | L6104a  |      | 249.55       | 395.56       | 298.15     | 1.0          | 823.8                                            | 809.1  | -14.7 | -1.8    | 55.7                                                   | 55.3 | -0.4 | -0.7    |
| 174              | 143              | C   | L6105a  |      | 213.15       | 416.15       | 298.15     | 1.0          | 809.7                                            | 816.1  | 6.4   | 0.8     | 58.0                                                   | 57.1 | -0.9 | -1.6    |
| 175              | 144              | C   | L6106a  |      | 170.15       | 394.56       | 298.15     | 1.0          | 809.5                                            | 789.1  | -20.3 | -2.5    | 54.7                                                   | 55.2 | 0.5  | 0.9     |
| 176              | 145              | C   | L6107a  |      | -            | 422.15       | 298.15     | 1.0          | 823.7                                            | 812.7  | -11.0 | -1.3    | -                                                      | -    | -    | -       |
| 177              | 145              | C   | L6107b  |      | -            | 422.15       | 339.0      | 1.0          | -                                                | -      | -     | -       | 51.4                                                   | 52.4 | 1.0  | 1.9     |
| 178              | 146              | C   | L6108a  |      | -            | 407.36       | 298.15     | 1.0          | 824.7                                            | 796.2  | -28.5 | -3.5    | 58.2                                                   | 57.2 | -1.0 | -1.8    |
| 179              | 147              | C   | L6109a  |      | -            | 399.66       | 298.15     | 1.0          | 820.1                                            | 793.3  | -26.9 | -3.3    | 56.0                                                   | 56.9 | 0.9  | 1.6     |
| 180              | 148              | C   | L6110a  |      | 183.15       | 404.85       | 298.15     | 1.0          | 803.0                                            | 782.0  | -21.1 | -2.6    | -                                                      | -    | -    | -       |
| 181              | 148              | C   | L6110b  |      | 183.15       | 404.85       | 308.0      | 1.0          | -                                                | -      | -     | -       | 49.6                                                   | 56.1 | 6.5  | 13.0    |
| 182              | 149              | C   | L6111a  |      | -            | 419.65       | 298.15     | 1.0          | 829.3                                            | 815.4  | -13.9 | -1.7    | 60.3                                                   | 58.4 | -1.9 | -3.2    |
| 183              | 150              | C   | L6112a  |      | -            | 425.55       | 298.15     | 1.0          | 820.5                                            | 812.5  | -8.0  | -1.0    | 61.7                                                   | 59.6 | -2.1 | -3.4    |
| 184              | 151              | C   | L6113a  |      | -            | 421.15       | 298.15     | 1.0          | 820.6                                            | 806.6  | -14.1 | -1.7    | 59.4                                                   | 58.3 | -1.1 | -1.9    |
| 185              | 152              | C   | L6114a  |      | -            | 408.55       | 298.15     | 1.0          | 814.5                                            | 789.1  | -25.4 | -3.1    | 58.6                                                   | 58.7 | 0.1  | 0.2     |
| 186              | 153              | C   | L6115a  |      | -            | 424.95       | 298.15     | 1.0          | 809.7                                            | 801.0  | -8.7  | -1.1    | -                                                      | -    | -    | -       |
| 187              | 153              | C   | L6115b  |      | -            | 424.95       | 313.0      | 1.0          | -                                                | -      | -     | -       | 63.9                                                   | 57.7 | -6.2 | -9.7    |
| 188              | 154              | C   | L6116a  |      | -            | 413.04       | 298.15     | 1.0          | 810.3                                            | 781.6  | -28.8 | -3.5    | 58.3                                                   | 58.4 | 0.1  | 0.2     |
| 189              | 155              | C   | L6117a  |      | 226.75       | 430.15       | 298.15     | 1.0          | 815.5                                            | 808.1  | -7.5  | -0.9    | 59.6                                                   | 61.0 | 1.4  | 2.4     |
| 190              | 156              | C   | L2201a  |      | 260.15       | 470.45       | 298.15     | 1.0          | 1109.9                                           | 1083.0 | -27.0 | -2.4    | 64.8                                                   | 68.4 | 3.6  | 5.6     |



Table S.7 – Comparison of experimental and simulated properties (continued)

| $n_{\text{sim}}$ | $n_{\text{iso}}$ | Set | Outlier | code | $T_m$<br>[K] | $T_b$<br>[K] | T<br>[K] | P<br>[bar] | $\rho_{\text{liq}}[\text{kg}\cdot\text{m}^{-3}]$ |        |       |         | $\Delta H_{\text{vap}}[\text{kJ}\cdot\text{mol}^{-1}]$ |      |      |         |
|------------------|------------------|-----|---------|------|--------------|--------------|----------|------------|--------------------------------------------------|--------|-------|---------|--------------------------------------------------------|------|------|---------|
|                  |                  |     |         |      |              |              |          |            | exp                                              | sim    | dev   | err [%] | exp                                                    | sim  | dev  | err [%] |
| 191              | 157              | C   | L3201a  | ×    | 213.15       | 460.75       | 298.15   | 1.0        | 1032.5                                           | 985.7  | -46.8 | -4.5    | 62.2                                                   | 71.2 | 9.0  | 14.5    |
| 192              | 158              | C   | L3202a  |      | 245.55       | 487.55       | 298.15   | 1.0        | 1050.3                                           | 1062.6 | 12.3  | 1.2     | 69.8                                                   | 75.6 | 5.8  | 8.3     |
| 193              | 159              | C   | L4201a  |      | -            | 451.15       | 298.15   | 1.0        | 989.6                                            | 972.9  | -16.7 | -1.7    | -                                                      | -    | -    | -       |
| 194              | 160              | C   | L4202a  |      | -            | 455.15       | 298.15   | 1.0        | 999.8                                            | 952.9  | -46.9 | -4.7    | -                                                      | -    | -    | -       |
| 195              | 160              | C   | L4202b  | ×    | -            | 455.15       | 332.0    | 1.0        | -                                                | -      | -     | -       | 58.4                                                   | 67.6 | 9.2  | 15.8    |
| 196              | 161              | C   | L4203a  |      | 182.15       | 487.15       | 293.15   | 1.0        | 1009.0                                           | 1002.1 | -6.9  | -0.7    | 71.3                                                   | 74.6 | 3.3  | 4.6     |
| 197              | 162              | C   | L4204a  |      | -            | 464.15       | 298.15   | 1.0        | 999.2                                            | 976.8  | -22.4 | -2.2    | -                                                      | -    | -    | -       |
| 198              | 163              | C   | L4205a  |      | 196.15       | 480.15       | 298.15   | 1.0        | 1000.2                                           | 974.4  | -25.8 | -2.6    | 72.6                                                   | 72.1 | -0.5 | -0.7    |
| 199              | 164              | C   | L4206a  |      | 293.58       | 501.15       | 298.15   | 1.0        | 1015.4                                           | 1021.7 | 6.3   | 0.6     | 76.6                                                   | 81.4 | 4.8  | 6.2     |
| 200              | 165              | C   | L5201a  |      | -            | 447.15       | 298.15   | 1.0        | 968.8                                            | 948.0  | -20.8 | -2.1    | -                                                      | -    | -    | -       |
| 201              | 166              | C   | L5204a  |      | -            | 472.15       | 293.15   | 1.0        | 964.5                                            | 943.5  | -21.1 | -2.2    | -                                                      | -    | -    | -       |
| 202              | 167              | C   | L5205a  |      | -            | 473.15       | 293.15   | 1.0        | 991.7                                            | 953.7  | -38.0 | -3.8    | -                                                      | -    | -    | -       |
| 203              | 168              | C   | L5206a  |      | -            | 473.15       | 294.65   | 1.0        | 984.2                                            | 954.8  | -29.4 | -3.0    | -                                                      | -    | -    | -       |
| 204              | 169              | C   | L5207a  |      | -            | 460.65       | 292.15   | 1.0        | 979.8                                            | 947.4  | -32.5 | -3.3    | -                                                      | -    | -    | -       |
| 205              | 170              | C   | L5208a  |      | -            | 472.15       | 298.15   | 1.0        | 956.0                                            | 921.6  | -34.4 | -3.6    | 72.5                                                   | 70.3 | -2.2 | -3.0    |
| 206              | 171              | C   | L5211a  |      | -            | 494.15       | 293.15   | 1.0        | 981.0                                            | 959.4  | -21.6 | -2.2    | -                                                      | -    | -    | -       |
| 207              | 172              | C   | L5212a  |      | -            | 482.15       | 297.15   | 1.0        | 969.1                                            | 956.0  | -13.1 | -1.4    | 74.6                                                   | 80.1 | 5.5  | 7.4     |
| 208              | 173              | C   | L5213a  |      | -            | 497.00       | 293.15   | 1.0        | 989.5                                            | 960.5  | -29.0 | -2.9    | -                                                      | -    | -    | -       |
| 209              | 174              | C   | L5214a  |      | 253.15       | 512.15       | 298.15   | 1.0        | 989.7                                            | 987.8  | -2.0  | -0.2    | 86.8                                                   | 89.4 | 2.6  | 3.0     |
| 210              | 175              | C   | L6201a  |      | 316.45       | 445.95       | 316.45   | 0.002      | 970.4                                            | 952.1  | -18.3 | -1.9    | -                                                      | -    | -    | -       |
| 211              | 176              | C   | L6204a  |      | -            | 505.76       | 298.15   | 1.0        | 963.8                                            | 942.9  | -20.9 | -2.2    | -                                                      | -    | -    | -       |
| 212              | 177              | C   | L6205a  |      | -            | 478.65       | 323.15   | 1.0        | 940.0                                            | 942.4  | 2.4   | 0.2     | -                                                      | -    | -    | -       |
| 213              | 178              | C   | L6206a  |      | -            | 480.00       | 298.15   | 1.0        | 964.5                                            | 933.2  | -31.3 | -3.2    | -                                                      | -    | -    | -       |
| 214              | 179              | C   | L6207a  |      | -            | 505.76       | 293.15   | 1.0        | 962.7                                            | 940.1  | -22.6 | -2.3    | -                                                      | -    | -    | -       |
| 215              | 180              | C   | L6208a  |      | 223.15       | 470.65       | 298.15   | 1.0        | 918.5                                            | 887.5  | -31.0 | -3.4    | 68.6                                                   | 62.8 | -5.8 | -8.4    |
| 216              | 181              | C   | L6209a  |      | -            | 484.65       | 287.15   | 1.0        | 990.6                                            | 919.4  | -71.2 | -7.2    | -                                                      | -    | -    | -       |
| 217              | 182              | C   | L6210a  |      | -            | 498.95       | 323.15   | 1.0        | 958.2                                            | 961.7  | 3.5   | 0.4     | -                                                      | -    | -    | -       |
| 218              | 183              | C   | L6212a  |      | -            | 480.00       | 277.15   | 1.0        | 996.0                                            | 999.4  | 3.4   | 0.3     | -                                                      | -    | -    | -       |
| 219              | 184              | C   | L6213a  |      | -            | 482.98       | 293.15   | 1.0        | 969.0                                            | 943.3  | -25.7 | -2.6    | -                                                      | -    | -    | -       |
| 220              | 185              | C   | L6215a  |      | -            | 494.35       | 293.15   | 1.0        | 964.5                                            | 951.5  | -13.0 | -1.4    | -                                                      | -    | -    | -       |
| 221              | 186              | C   | L6216a  |      | -            | 496.94       | 293.15   | 1.0        | 976.8                                            | 965.8  | -11.0 | -1.1    | -                                                      | -    | -    | -       |
| 222              | 187              | C   | L6217a  |      | -            | 480.00       | 298.15   | 1.0        | 967.7                                            | 943.8  | -23.9 | -2.5    | -                                                      | -    | -    | -       |
| 223              | 188              | C   | L6218a  |      | -            | -            | 293.15   | 1.0        | 977.1                                            | 979.1  | 2.0   | 0.2     | -                                                      | -    | -    | -       |
| 224              | 189              | C   | L6219a  |      | -            | 493.45       | 295.15   | 1.0        | 973.7                                            | 940.6  | -33.1 | -3.4    | -                                                      | -    | -    | -       |
| 225              | 190              | C   | L6220a  | ×    | -            | 496.94       | 273.15   | 1.0        | 799.3                                            | 940.7  | 141.4 | 17.7    | -                                                      | -    | -    | -       |
| 226              | 191              | C   | L6221a  |      | -            | 478.15       | 288.15   | 1.0        | 989.0                                            | 927.7  | -61.3 | -6.2    | -                                                      | -    | -    | -       |
| 227              | 192              | C   | L6222a  |      | -            | 484.15       | 294.15   | 1.0        | 951.6                                            | 916.1  | -35.5 | -3.7    | -                                                      | -    | -    | -       |
| 228              | 193              | C   | L6223a  |      | 316.15       | 493.95       | 323.15   | 1.0        | 939.8                                            | 897.8  | -42.0 | -4.5    | -                                                      | -    | -    | -       |
| 229              | 194              | C   | L6224a  |      | -            | 474.16       | 298.15   | 1.0        | 963.6                                            | 955.9  | -7.7  | -0.8    | -                                                      | -    | -    | -       |
| 230              | 195              | C   | L6225a  |      | -            | 521.55       | 293.15   | 1.0        | 972.6                                            | 973.8  | 1.1   | 0.1     | -                                                      | -    | -    | -       |
| 231              | 196              | C   | L6226a  |      | -            | 496.94       | 293.15   | 1.0        | 971.9                                            | 967.5  | -4.4  | -0.5    | -                                                      | -    | -    | -       |
| 232              | 197              | C   | L6227a  |      | -            | 508.15       | 295.15   | 1.0        | 958.0                                            | 940.7  | -17.3 | -1.8    | -                                                      | -    | -    | -       |
| 233              | 198              | C   | L6228a  |      | -            | 529.15       | 289.45   | 1.0        | 982.0                                            | 950.7  | -31.3 | -3.2    | -                                                      | -    | -    | -       |
| 234              | 199              | C   | L6230a  |      | -            | 510.15       | 298.15   | 1.0        | 964.0                                            | 941.3  | -22.7 | -2.4    | -                                                      | -    | -    | -       |
| 235              | 200              | C   | L6231a  |      | 314.65       | 516.15       | 318.15   | 1.0        | 968.3                                            | 950.9  | -17.4 | -1.8    | -                                                      | -    | -    | -       |
| 236              | 200              | C   | L6231b  |      | 314.65       | 516.15       | 342.0    | 1.0        | -                                                | -      | -     | -       | 87.0                                                   | 86.9 | -0.1 | -0.1    |
| 237              | 201              | C   | L3301a  |      | 291.35       | 563.15       | 298.15   | 1.0        | 1258.3                                           | 1189.5 | -68.8 | -5.5    | -                                                      | -    | -    | -       |
| 238              | 201              | C   | L3301b  |      | 291.35       | 563.15       | 308.0    | 1.0        | -                                                | -      | -     | -       | 85.8                                                   | 87.7 | 1.9  | 2.2     |

Table S.7 – Comparison of experimental and simulated properties (continued)

| $n_{\text{sim}}$ | $n_{\text{iso}}$ | Set | Outlier | code | $T_m$<br>[K] | $T_b$<br>[K] | T<br>[K] | P<br>[bar] | $\rho_{\text{liq}}[\text{kg}\cdot\text{m}^{-3}]$ |        |       |         | $\Delta H_{\text{vap}}[\text{kJ}\cdot\text{mol}^{-1}]$ |      |       |         |
|------------------|------------------|-----|---------|------|--------------|--------------|----------|------------|--------------------------------------------------|--------|-------|---------|--------------------------------------------------------|------|-------|---------|
|                  |                  |     |         |      |              |              |          |            | exp                                              | sim    | dev   | err [%] | exp                                                    | sim  | dev   | err [%] |
| 239              | 202              | C   | L4302a  |      | -            | -            | 298.15   | 1.0        | 1184.0                                           | 1146.3 | -37.7 | -3.2    | -                                                      | -    | -     | -       |
| 240              | 203              | C   | L5303a  |      | -            | 460.64       | 298.15   | 1.0        | 1103.6                                           | 1117.8 | 14.2  | 1.3     | -                                                      | -    | -     | -       |
| 241              | 204              | C   | L6306a  |      | -            | -            | 293.15   | 1.0        | 1104.1                                           | 1089.9 | -14.2 | -1.3    | -                                                      | -    | -     | -       |
| 242              | 205              | C   | L6307a  |      | -            | 472.47       | 298.15   | 1.0        | 1100.0                                           | 1071.3 | -28.6 | -2.6    | -                                                      | -    | -     | -       |
| 243              | 206              | C   | C1201a  |      | 281.45       | 373.71       | 298.15   | 1.0        | 1213.6                                           | 1207.0 | -6.6  | -0.5    | 46.3                                                   | 44.0 | -2.3  | -4.9    |
| 244              | 207              | C   | C2201a  |      | 290.15       | 391.05       | 298.15   | 1.01       | 1043.5                                           | 1073.5 | 30.0  | 2.9     | 50.3                                                   | 50.1 | -0.2  | -0.4    |
| 245              | 208              | C   | C3201a  |      | 252.65       | 414.32       | 298.15   | 1.01       | 988.1                                            | 988.2  | 0.1   | 0.0     | 54.9                                                   | 54.0 | -0.9  | -1.6    |
| 246              | 209              | C   | C4201a  |      | 227.15       | 427.55       | 298.15   | 1.0        | 943.9                                            | 931.9  | -12.0 | -1.3    | 56.3                                                   | 56.7 | 0.4   | 0.7     |
| 247              | 210              | C   | C4202a  |      | 268.03       | 436.85       | 298.15   | 1.0        | 952.9                                            | 959.2  | 6.2   | 0.7     | 58.2                                                   | 59.1 | 0.9   | 1.6     |
| 248              | 211              | C   | C5201a  |      | 309.15       | 436.95       | 309.82   | 1.0        | 907.5                                            | 920.3  | 12.8  | 1.4     | -                                                      | -    | -     | -       |
| 249              | 211              | C   | C5201b  |      | 309.15       | 436.95       | 320.0    | 1.0        | -                                                | -      | -     | -       | 57.6                                                   | 56.2 | -1.4  | -2.4    |
| 250              | 212              | C   | C5202a  |      | -            | 450.15       | 298.15   | 1.0        | 934.7                                            | 930.2  | -4.5  | -0.5    | -                                                      | -    | -     | -       |
| 251              | 213              | C   | C5203a  |      | 243.55       | 448.25       | 298.15   | 1.0        | 924.1                                            | 930.7  | 6.6   | 0.7     | 61.2                                                   | 62.1 | 0.9   | 1.5     |
| 252              | 214              | C   | C5204a  |      | 239.52       | 458.65       | 298.15   | 1.0        | 934.4                                            | 940.7  | 6.3   | 0.7     | 63.0                                                   | 64.3 | 1.4   | 2.1     |
| 253              | 215              | C   | C6201a  |      | 258.15       | 459.15       | 293.15   | 1.0        | 927.5                                            | 944.7  | 17.2  | 1.9     | -                                                      | -    | -     | -       |
| 254              | 215              | C   | C6201b  |      | 258.15       | 459.15       | 370.0    | 1.0        | -                                                | -      | -     | -       | 59.4                                                   | 57.3 | -2.1  | -3.6    |
| 255              | 216              | C   | C6202a  |      | 279.15       | 457.15       | 298.05   | 1.0        | 908.0                                            | 933.1  | 25.1  | 2.8     | 64.0                                                   | 64.0 | -0.1  | -0.1    |
| 256              | 217              | C   | C6203a  |      | -            | 464.85       | 293.15   | 1.0        | 927.5                                            | 930.2  | 2.7   | 0.3     | -                                                      | -    | -     | -       |
| 257              | 218              | C   | C6204a  |      | 241.35       | 466.15       | 298.15   | 1.0        | 923.5                                            | 927.0  | 3.5   | 0.4     | -                                                      | -    | -     | -       |
| 258              | 218              | C   | C6204b  |      | 241.35       | 466.15       | 388.0    | 1.0        | -                                                | -      | -     | -       | 58.2                                                   | 59.1 | 0.9   | 1.6     |
| 259              | 219              | C   | C6205a  |      | -            | -            | 298.15   | 1.0        | 918.2                                            | 920.7  | 2.5   | 0.3     | -                                                      | -    | -     | -       |
| 260              | 220              | C   | C6206a  |      | -            | -            | 298.15   | 1.0        | 923.0                                            | 930.7  | 7.7   | 0.8     | -                                                      | -    | -     | -       |
| 261              | 221              | C   | C6207a  |      | 240.15       | 473.65       | 298.15   | 1.0        | 917.0                                            | 921.6  | 4.6   | 0.5     | -                                                      | -    | -     | -       |
| 262              | 221              | C   | C6207b  | ×    | 240.15       | 473.65       | 354.0    | 1.0        | -                                                | -      | -     | -       | 91.7                                                   | 63.1 | -28.6 | -31.2   |
| 263              | 222              | C   | C6208a  |      | 269.05       | 478.85       | 298.15   | 1.0        | 922.9                                            | 928.2  | 5.3   | 0.6     | 69.2                                                   | 69.5 | 0.3   | 0.4     |
| 264              | 223              | C   | M1101a  |      | 179.73       | 266.82       | 266.85   | 1.0        | 694.2                                            | 761.5  | 67.3  | 9.7     | 26.1                                                   | 27.8 | 1.7   | 6.5     |
| 265              | 223              | C   | M1101b  |      | 179.73       | 266.82       | 298.15   | 3.52       | 655.0                                            | 698.8  | 43.8  | 6.7     | -                                                      | -    | -     | -       |
| 266              | 224              | C   | M2101a  |      | 192.15       | 289.73       | 288.15   | 1.0        | 688.6                                            | 701.3  | 12.8  | 1.9     | 27.4                                                   | 27.5 | 0.1   | 0.6     |
| 267              | 225              | C   | M3101a  |      | 178.03       | 305.55       | 298.15   | 1.01       | 683.9                                            | 659.3  | -24.7 | -3.6    | 28.4                                                   | 26.6 | -1.8  | -6.3    |
| 268              | 226              | C   | M3102a  |      | 188.37       | 321.65       | 298.15   | 1.01       | 712.8                                            | 713.9  | 1.2   | 0.2     | 31.3                                                   | 30.4 | -0.9  | -2.8    |
| 269              | 227              | C   | M4101a  |      | 206.23       | 317.55       | 298.15   | 1.0        | 690.1                                            | 655.1  | -35.0 | -5.1    | 29.6                                                   | 23.5 | -6.1  | -20.6   |
| 270              | 228              | C   | M4102a  |      | -            | 336.15       | 298.15   | 1.01       | 717.8                                            | 702.4  | -15.4 | -2.1    | 32.6                                                   | 31.0 | -1.6  | -4.8    |
| 271              | 229              | C   | M4103a  |      | 187.15       | 340.88       | 298.15   | 1.0        | 729.1                                            | 716.1  | -13.0 | -1.8    | 33.8                                                   | 31.9 | -1.9  | -5.6    |
| 272              | 230              | C   | M4104a  |      | 224.15       | 350.55       | 298.15   | 1.0        | 736.8                                            | 735.6  | -1.3  | -0.2    | 35.6                                                   | 35.1 | -0.5  | -1.3    |
| 273              | 231              | C   | M5101a  |      | 168.15       | 350.15       | 298.15   | 0.11       | 727.6                                            | 706.8  | -20.8 | -2.9    | 32.5                                                   | 28.6 | -3.8  | -11.8   |
| 274              | 232              | C   | M5102a  |      | -            | 350.15       | 298.15   | 0.1        | 728.1                                            | 738.0  | 9.9   | 1.4     | 33.4                                                   | 32.7 | -0.7  | -2.0    |
| 275              | 233              | C   | M5103a  |      | 223.15       | 357.15       | 298.15   | 0.08       | 753.0                                            | 724.6  | -28.4 | -3.8    | 33.9                                                   | 33.8 | -0.1  | -0.1    |
| 276              | 234              | C   | M5104a  |      | -            | 362.15       | 291.35   | 1.0        | 711.3                                            | 739.2  | 27.9  | 3.9     | -                                                      | -    | -     | -       |
| 277              | 234              | C   | M5104b  |      | -            | 362.15       | 298.15   | 0.06       | -                                                | -      | -     | -       | 34.6                                                   | 35.3 | 0.7   | 2.1     |
| 278              | 235              | C   | M5105a  |      | -            | 368.65       | 298.15   | 1.0        | 750.5                                            | 746.1  | -4.3  | -0.6    | -                                                      | -    | -     | -       |
| 279              | 235              | C   | M5105b  |      | -            | 368.65       | 298.15   | 0.04       | -                                                | -      | -     | -       | 35.6                                                   | 37.0 | 1.4   | 3.9     |
| 280              | 236              | C   | M5106a  |      | -            | 364.85       | 298.15   | 0.05       | 735.7                                            | 725.3  | -10.4 | -1.4    | 34.8                                                   | 35.8 | 1.0   | 2.8     |
| 281              | 237              | C   | M5107a  |      | -            | 370.15       | 298.15   | 1.0        | 744.3                                            | 744.3  | -0.0  | -0.0    | -                                                      | -    | -     | -       |
| 282              | 237              | C   | M5107b  |      | -            | 370.15       | 298.15   | 0.04       | -                                                | -      | -     | -       | 35.1                                                   | 38.5 | 3.4   | 9.6     |
| 283              | 238              | C   | M5108a  |      | 222.15       | 377.65       | 298.15   | 0.04       | 751.0                                            | 751.2  | 0.2   | 0.0     | -                                                      | -    | -     | -       |
| 284              | 238              | C   | M5108b  |      | 222.15       | 377.65       | 298.0    | 1.0        | -                                                | -      | -     | -       | 40.1                                                   | 39.9 | -0.2  | -0.4    |
| 285              | 239              | C   | M6101a  |      | -            | 377.65       | 298.15   | 0.03       | 760.1                                            | 745.3  | -14.7 | -1.9    | -                                                      | -    | -     | -       |
| 286              | 240              | C   | M6102a  |      | 253.15       | 375.15       | 298.15   | 0.04       | 760.1                                            | 759.9  | -0.2  | -0.0    | 36.1                                                   | 35.7 | -0.4  | -1.1    |

Table S.7 – Comparison of experimental and simulated properties (continued)

| $n_{\text{sim}}$ | $n_{\text{iso}}$ | Set | Outlier | code | $T_m$<br>[K] | $T_b$<br>[K] | $T$<br>[K] | $P$<br>[bar] | $\rho_{\text{liq}}[\text{kg}\cdot\text{m}^{-3}]$ |       |       |         | $\Delta H_{\text{vap}}[\text{kJ}\cdot\text{mol}^{-1}]$ |      |      |         |
|------------------|------------------|-----|---------|------|--------------|--------------|------------|--------------|--------------------------------------------------|-------|-------|---------|--------------------------------------------------------|------|------|---------|
|                  |                  |     |         |      |              |              |            |              | exp                                              | sim   | dev   | err [%] | exp                                                    | sim  | dev  | err [%] |
| 287              | 241              | C   | M6103a  |      | -            | 398.45       | 300.86     | 0.01         | 757.9                                            | 741.7 | -16.1 | -2.1    | -                                                      | -    | -    | -       |
| 288              | 242              | C   | M6104a  |      | -            | 386.65       | 298.15     | 0.02         | 760.1                                            | 773.7 | 13.6  | 1.8     | -                                                      | -    | -    | -       |
| 289              | 243              | C   | M6105a  |      | -            | 377.15       | 298.15     | 0.03         | 743.0                                            | 729.4 | -13.6 | -1.8    | 36.1                                                   | 33.5 | -2.6 | -7.2    |
| 290              | 244              | C   | M6106a  |      | -            | 405.98       | 306.83     | 0.01         | 753.1                                            | 761.4 | 8.3   | 1.1     | -                                                      | -    | -    | -       |
| 291              | 245              | C   | M6107a  |      | -            | 408.33       | 308.71     | 0.01         | 741.7                                            | 736.0 | -5.6  | -0.8    | -                                                      | -    | -    | -       |
| 292              | 246              | C   | M6108a  |      | -            | 408.33       | 308.71     | 0.01         | 741.7                                            | 741.1 | -0.5  | -0.1    | -                                                      | -    | -    | -       |
| 293              | 247              | C   | M6109a  |      | -            | 378.15       | 298.15     | 0.03         | 752.8                                            | 768.2 | 15.4  | 2.0     | -                                                      | -    | -    | -       |
| 294              | 248              | C   | M6110a  |      | -            | 381.65       | 298.15     | 0.02         | 745.7                                            | 740.4 | -5.3  | -0.7    | 37.4                                                   | 39.2 | 1.8  | 4.9     |
| 295              | 249              | C   | M6111a  |      | 398.15       | 408.77       | 309.07     | 0.01         | 751.3                                            | 758.7 | 7.4   | 1.0     | -                                                      | -    | -    | -       |
| 296              | 250              | C   | M6112a  |      | -            | 408.77       | 309.07     | 0.01         | 761.1                                            | 734.6 | -26.5 | -3.5    | -                                                      | -    | -    | -       |
| 297              | 251              | C   | M6113a  |      | -            | 400.00       | 302.05     | 0.01         | 759.8                                            | 757.5 | -2.3  | -0.3    | -                                                      | -    | -    | -       |
| 298              | 252              | C   | M6114a  |      | -            | 395.15       | 298.15     | 0.01         | 767.0                                            | 767.8 | 0.8   | 0.1     | -                                                      | -    | -    | -       |
| 299              | 253              | C   | M6115a  |      | -            | 403.15       | 305.93     | 0.01         | 756.7                                            | 732.0 | -24.6 | -3.3    | 38.2                                                   | 39.6 | 1.4  | 3.7     |
| 300              | 254              | C   | M6116a  |      | -            | 397.05       | 301.25     | 0.01         | 767.5                                            | 753.4 | -14.1 | -1.8    | 39.8                                                   | 42.6 | 2.8  | 6.9     |
| 301              | 255              | C   | M6117a  |      | 252.15       | 404.65       | 298.15     | 1.0          | 763.0                                            | 763.5 | 0.5   | 0.1     | 45.0                                                   | 44.7 | -0.3 | -0.7    |
| 302              | 256              | C   | N2101a  |      | 180.15       | 280.03       | 282.82     | 1.0          | 667.9                                            | 731.0 | 63.1  | 9.4     | 27.2                                                   | 27.1 | -0.1 | -0.4    |
| 303              | 256              | C   | N2101b  |      | 180.15       | 280.03       | 298.15     | 1.96         | 650.0                                            | 705.5 | 55.5  | 8.6     | -                                                      | -    | -    | -       |
| 304              | 257              | C   | N3101a  |      | -            | 309.15       | 298.15     | 0.65         | 684.0                                            | 700.5 | 16.5  | 2.4     | 26.7                                                   | 28.2 | 1.5  | 5.8     |
| 305              | 258              | C   | N4101a  |      | -            | 323.55       | 288.15     | 1.0          | 740.0                                            | 701.3 | -38.7 | -5.2    | 30.7                                                   | 29.3 | -1.4 | -4.4    |
| 306              | 259              | C   | N4102a  |      | 223.15       | 328.60       | 298.15     | 1.0          | 701.2                                            | 707.2 | 6.0   | 0.9     | 31.2                                                   | 30.8 | -0.4 | -1.4    |
| 307              | 260              | C   | N4103a  |      | -            | 336.15       | 298.15     | 0.2          | 711.9                                            | 719.5 | 7.6   | 1.1     | 31.1                                                   | 31.8 | 0.6  | 1.9     |
| 308              | 261              | C   | N5101a  |      | -            | 350.15       | 298.15     | 1.0          | 727.0                                            | 743.0 | 16.0  | 2.2     | 32.3                                                   | 29.5 | -2.8 | -8.6    |
| 309              | 262              | C   | N5102a  |      | -            | 351.65       | 298.15     | 0.1          | 720.0                                            | 719.8 | -0.2  | -0.0    | 33.3                                                   | 32.8 | -0.5 | -1.5    |
| 310              | 263              | C   | N5103a  |      | -            | 346.15       | 298.15     | 0.12         | 730.0                                            | 719.2 | -10.8 | -1.5    | -                                                      | -    | -    | -       |
| 311              | 264              | C   | N5104a  |      | -            | 349.15       | 298.15     | 0.13         | 720.0                                            | 703.1 | -16.9 | -2.4    | -                                                      | -    | -    | -       |
| 312              | 264              | C   | N5104b  |      | -            | 349.15       | 298.0      | 1.0          | -                                                | -     | -     | -       | 33.1                                                   | 31.6 | -1.5 | -4.5    |
| 313              | 265              | C   | N5105a  |      | -            | 353.45       | 298.15     | 0.11         | 726.7                                            | 720.9 | -5.8  | -0.8    | 31.9                                                   | 34.4 | 2.5  | 8.0     |
| 314              | 266              | C   | N5106a  |      | -            | 364.25       | 298.15     | 0.05         | 728.1                                            | 735.6 | 7.5   | 1.0     | -                                                      | -    | -    | -       |
| 315              | 266              | C   | N5106b  |      | -            | 364.25       | 298.0      | 1.0          | -                                                | -     | -     | -       | 38.1                                                   | 36.4 | -1.7 | -4.4    |
| 316              | 267              | C   | N6101a  |      | -            | 383.62       | 298.15     | 0.02         | 740.1                                            | 737.5 | -2.6  | -0.3    | -                                                      | -    | -    | -       |
| 317              | 268              | C   | N6102a  |      | -            | 351.15       | 298.15     | 1.0          | 716.1                                            | 761.6 | 45.5  | 6.3     | -                                                      | -    | -    | -       |
| 318              | 268              | C   | N6102b  |      | -            | 351.15       | 298.15     | 0.1          | -                                                | -     | -     | -       | 34.1                                                   | 33.8 | -0.3 | -0.8    |
| 319              | 269              | C   | N6103a  |      | -            | 386.41       | 298.15     | 0.02         | 740.1                                            | 736.5 | -3.5  | -0.5    | -                                                      | -    | -    | -       |
| 320              | 270              | C   | N6104a  |      | 212.15       | 357.05       | 298.15     | 1.0          | 712.3                                            | 715.2 | 2.9   | 0.4     | 34.5                                                   | 34.1 | -0.4 | -1.2    |
| 321              | 271              | C   | N6105a  |      | -            | 381.15       | 298.15     | 0.03         | 740.1                                            | 741.8 | 1.7   | 0.2     | 37.4                                                   | 37.0 | -0.4 | -1.0    |
| 322              | 272              | C   | N6106a  |      | -            | 371.15       | 298.15     | 0.04         | 729.8                                            | 725.1 | -4.7  | -0.6    | -                                                      | -    | -    | -       |
| 323              | 272              | C   | N6106b  |      | -            | 371.15       | 298.0      | 1.0          | -                                                | -     | -     | -       | 37.9                                                   | 35.9 | -2.0 | -5.2    |
| 324              | 273              | C   | N6107a  |      | -            | 371.45       | 298.15     | 0.04         | 723.2                                            | 716.3 | -6.9  | -0.9    | -                                                      | -    | -    | -       |
| 325              | 273              | C   | N6107b  |      | -            | 371.45       | 298.0      | 1.0          | -                                                | -     | -     | -       | 37.3                                                   | 35.6 | -1.7 | -4.5    |
| 326              | 274              | C   | N6108a  |      | -            | 386.41       | 298.15     | 0.02         | 740.1                                            | 744.0 | 4.0   | 0.5     | -                                                      | -    | -    | -       |
| 327              | 275              | C   | N6109a  |      | -            | 371.15       | 298.15     | 0.04         | 730.0                                            | 720.9 | -9.2  | -1.2    | 36.1                                                   | 36.0 | -0.1 | -0.3    |
| 328              | 276              | C   | N6110a  |      | -            | -            | 295.15     | 1.0          | 739.0                                            | 746.9 | 7.9   | 1.1     | -                                                      | -    | -    | -       |
| 329              | 277              | C   | N6111a  |      | 210.15       | 382.00       | 298.15     | 1.0          | 734.9                                            | 731.1 | -3.8  | -0.5    | 40.0                                                   | 38.3 | -1.7 | -4.2    |
| 330              | 278              | C   | N6112a  |      | -            | 381.15       | 298.15     | 0.02         | 735.4                                            | 734.9 | -0.6  | -0.1    | -                                                      | -    | -    | -       |
| 331              | 278              | C   | N6112b  |      | -            | 381.15       | 298.0      | 1.0          | -                                                | -     | -     | -       | 40.2                                                   | 39.2 | -1.0 | -2.6    |
| 332              | 279              | C   | N6113a  |      | -            | 390.55       | 298.15     | 0.02         | 743.0                                            | 747.9 | 4.9   | 0.7     | 39.9                                                   | 41.1 | 1.2  | 2.9     |
| 333              | 280              | C   | R3101a  | ×    | 156.05       | 276.02       | 273.15     | 1.0          | 655.7                                            | 743.8 | 88.0  | 13.4    | 22.9                                                   | 28.5 | 5.6  | 24.3    |
| 334              | 280              | C   | R3101b  | ×    | 156.05       | 276.02       | 298.15     | 2.33         | 628.9                                            | 718.0 | 89.1  | 14.2    | -                                                      | -    | -    | -       |

Table S.7 – Comparison of experimental and simulated properties (continued)

| $n_{\text{sim}}$ | $n_{\text{iso}}$ | Set | Outlier | code | $T_m$<br>[K] | $T_b$<br>[K] | $T$<br>[K] | $P$<br>[bar] | $\rho_{\text{liq}}[\text{kg}\cdot\text{m}^{-3}]$ |       |       |         | $\Delta H_{\text{vap}}[\text{kJ}\cdot\text{mol}^{-1}]$ |      |       |         |
|------------------|------------------|-----|---------|------|--------------|--------------|------------|--------------|--------------------------------------------------|-------|-------|---------|--------------------------------------------------------|------|-------|---------|
|                  |                  |     |         |      |              |              |            |              | exp                                              | sim   | dev   | err [%] | exp                                                    | sim  | dev   | err [%] |
| 335              | 281              | C   | R4101a  |      | 133.15       | 310.15       | 298.15     | 1.0          | 669.4                                            | 727.1 | 57.7  | 8.6     | -                                                      | -    | -     | -       |
| 336              | 281              | C   | R4101b  |      | 133.15       | 310.15       | 298.15     | 0.67         | -                                                | -     | -     | -       | 26.7                                                   | 30.9 | 4.2   | 15.9    |
| 337              | 282              | C   | R5101a  |      | -            | 339.18       | 298.15     | 1.0          | 710.6                                            | 729.5 | 18.9  | 2.7     | 31.9                                                   | 32.8 | 0.9   | 2.8     |
| 338              | 283              | C   | R5102a  |      | 77.15        | 339.15       | 298.15     | 1.0          | 701.5                                            | 735.9 | 34.4  | 4.9     | 31.8                                                   | 34.5 | 2.7   | 8.4     |
| 339              | 284              | C   | R5103a  |      | -            | 339.15       | 298.15     | 0.21         | 695.6                                            | 742.5 | 46.9  | 6.8     | 31.1                                                   | 35.5 | 4.4   | 14.0    |
| 340              | 285              | C   | R6101a  |      | -            | 363.15       | 298.15     | 1.0          | 737.6                                            | 758.7 | 21.1  | 2.9     | 34.8                                                   | 35.0 | 0.1   | 0.4     |
| 341              | 286              | C   | R6102a  |      | -            | 367.15       | 298.15     | 0.05         | 733.9                                            | 752.6 | 18.7  | 2.5     | 35.4                                                   | 37.5 | 2.2   | 6.2     |
| 342              | 287              | C   | R6103a  |      | -            | 364.65       | 298.15     | 0.06         | 721.5                                            | 739.5 | 18.1  | 2.5     | 35.0                                                   | 36.5 | 1.5   | 4.2     |
| 343              | 288              | C   | R6104a  |      | -            | 354.15       | 298.15     | 0.1          | 720.0                                            | 747.0 | 27.0  | 3.8     | 33.1                                                   | 38.0 | 5.0   | 14.9    |
| 344              | 289              | C   | R6105a  |      | 158.45       | 361.92       | 298.15     | 1.01         | 723.0                                            | 746.2 | 23.2  | 3.2     | -                                                      | -    | -     | -       |
| 345              | 289              | C   | R6105b  |      | 158.45       | 361.92       | 298.15     | 0.06         | -                                                | -     | -     | -       | 34.9                                                   | 37.9 | 2.9   | 8.4     |
| 346              | 290              | C   | R6106a  |      | -            | 364.65       | 298.15     | 0.06         | 718.0                                            | 747.9 | 29.9  | 4.2     | 35.0                                                   | 38.9 | 3.9   | 11.1    |
| 347              | 291              | C   | R6107a  |      | -            | 367.15       | 298.15     | 0.06         | 716.0                                            | 755.3 | 39.3  | 5.5     | 35.3                                                   | 40.3 | 5.0   | 14.2    |
| 348              | 292              | C   | N2201a  |      | 284.29       | 390.41       | 298.15     | 0.02         | 892.8                                            | 971.8 | 78.9  | 8.8     | -                                                      | -    | -     | -       |
| 349              | 292              | C   | N2201b  |      | 284.29       | 390.41       | 298.0      | 1.0          | -                                                | -     | -     | -       | 45.0                                                   | 49.0 | 4.0   | 9.0     |
| 350              | 293              | C   | N3201a  |      | -            | 388.15       | 298.15     | 1.0          | 841.0                                            | 899.0 | 58.0  | 6.9     | -                                                      | -    | -     | -       |
| 351              | 293              | C   | N3201b  |      | -            | 388.15       | 388.15     | 1.0          | -                                                | -     | -     | -       | 33.2                                                   | 36.9 | 3.6   | 11.0    |
| 352              | 294              | C   | N3202a  |      | -            | 392.45       | 298.15     | 0.02         | 856.0                                            | 882.5 | 26.5  | 3.1     | -                                                      | -    | -     | -       |
| 353              | 294              | C   | N3202b  |      | -            | 392.45       | 298.0      | 1.0          | -                                                | -     | -     | -       | 44.2                                                   | 46.4 | 2.2   | 4.9     |
| 354              | 295              | C   | N3203a  |      | 262.25       | 412.95       | 298.15     | 1.0          | 884.0                                            | 919.9 | 35.9  | 4.1     | 50.2                                                   | 48.4 | -1.8  | -3.6    |
| 355              | 296              | C   | N4201a  | ×    | -            | 378.65       | 298.15     | 1.0          | 803.0                                            | 886.9 | 83.8  | 10.4    | -                                                      | -    | -     | -       |
| 356              | 296              | C   | N4201b  | ×    | -            | 378.65       | 378.65     | 1.0          | -                                                | -     | -     | -       | 31.1                                                   | 41.0 | 9.9   | 31.8    |
| 357              | 297              | C   | N4202a  |      | -            | 393.15       | 288.15     | 1.0          | 828.0                                            | 886.7 | 58.7  | 7.1     | -                                                      | -    | -     | -       |
| 358              | 297              | C   | N4202b  |      | -            | 393.15       | 393.15     | 1.0          | -                                                | -     | -     | -       | 35.0                                                   | 38.1 | 3.1   | 8.9     |
| 359              | 298              | C   | N4203a  |      | -            | 396.15       | 298.15     | 1.0          | 841.0                                            | 849.8 | 8.8   | 1.1     | 45.8                                                   | 40.6 | -5.2  | -11.4   |
| 360              | 299              | C   | N4204a  |      | -            | 402.15       | 298.15     | 1.0          | 837.0                                            | 861.5 | 24.5  | 2.9     | -                                                      | -    | -     | -       |
| 361              | 299              | C   | N4204b  |      | -            | 402.15       | 373.0      | 1.0          | -                                                | -     | -     | -       | 43.0                                                   | 39.9 | -3.1  | -7.2    |
| 362              | 300              | C   | N4205a  |      | -            | 413.15       | 298.0      | 1.0          | -                                                | -     | -     | -       | 53.1                                                   | 47.2 | -5.8  | -11.0   |
| 363              | 301              | C   | N4206a  |      | -            | -            | 298.0      | 1.0          | -                                                | -     | -     | -       | 46.9                                                   | 50.1 | 3.2   | 6.8     |
| 364              | 302              | C   | N4207a  | ×    | -            | 419.15       | 419.15     | 1.0          | -                                                | -     | -     | -       | 43.7                                                   | 33.3 | -10.5 | -23.9   |
| 365              | 303              | C   | N4208a  |      | 295.05       | 431.65       | 298.15     | 1.0          | 877.0                                            | 900.8 | 23.8  | 2.7     | 55.2                                                   | 54.5 | -0.7  | -1.2    |
| 366              | 304              | C   | N5201a  | ×    | -            | 356.15       | 291.15     | 1.0          | 749.1                                            | 854.9 | 105.8 | 14.1    | -                                                      | -    | -     | -       |
| 367              | 304              | C   | N5201b  | ×    | -            | 356.15       | 298.0      | 1.0          | -                                                | -     | -     | -       | 33.1                                                   | 44.4 | 11.3  | 34.2    |
| 368              | 305              | C   | N5202a  | ×    | -            | 390.15       | 390.15     | 1.0          | -                                                | -     | -     | -       | 29.7                                                   | 41.3 | 11.6  | 39.1    |
| 369              | 306              | C   | N5203a  |      | -            | 406.65       | 293.15     | 1.0          | 827.2                                            | 872.9 | 45.7  | 5.5     | 42.2                                                   | 48.7 | 6.5   | 15.5    |
| 370              | 307              | C   | N5204a  |      | -            | 418.15       | 418.15     | 1.0          | -                                                | -     | -     | -       | 36.9                                                   | 37.0 | 0.1   | 0.2     |
| 371              | 308              | C   | N5205a  |      | -            | 409.15       | 409.15     | 1.0          | -                                                | -     | -     | -       | 34.3                                                   | 35.6 | 1.2   | 3.6     |
| 372              | 309              | C   | N5206a  |      | -            | 426.15       | 426.15     | 1.0          | -                                                | -     | -     | -       | 39.4                                                   | 33.2 | -6.2  | -15.7   |
| 373              | 310              | C   | N5207a  |      | -            | 421.65       | 421.65     | 1.0          | -                                                | -     | -     | -       | 38.0                                                   | 37.1 | -0.8  | -2.2    |
| 374              | 311              | C   | N5208a  |      | -            | 437.15       | 298.0      | 1.0          | -                                                | -     | -     | -       | 54.9                                                   | 50.2 | -4.7  | -8.6    |
| 375              | 312              | C   | N5209a  |      | 284.95       | 452.15       | 298.15     | 1.0          | 873.0                                            | 886.9 | 13.9  | 1.6     | 58.7                                                   | 58.7 | -0.0  | -0.0    |
| 376              | 313              | C   | N6201a  | ×    | 215.15       | 394.15       | 298.15     | 1.0          | 770.0                                            | 846.6 | 76.7  | 9.9     | 41.4                                                   | 50.6 | 9.2   | 22.2    |
| 377              | 314              | C   | N6202a  | ×    | -            | 407.65       | 298.15     | 1.0          | 738.0                                            | 836.8 | 98.8  | 13.4    | -                                                      | -    | -     | -       |
| 378              | 314              | C   | N6202b  |      | -            | 407.65       | 407.65     | 1.0          | -                                                | -     | -     | -       | 35.1                                                   | 42.4 | 7.3   | 20.8    |
| 379              | 315              | C   | N6203a  | ×    | -            | 414.15       | 414.15     | 1.0          | -                                                | -     | -     | -       | 30.6                                                   | 41.5 | 10.9  | 35.6    |
| 380              | 316              | C   | N6205a  | ×    | -            | 417.15       | 293.15     | 1.0          | 828.0                                            | 858.9 | 30.9  | 3.7     | 45.8                                                   | 54.7 | 8.9   | 19.4    |
| 381              | 317              | C   | N6206a  |      | -            | 419.15       | 293.15     | 1.0          | 828.0                                            | 827.2 | -0.8  | -0.1    | -                                                      | -    | -     | -       |
| 382              | 317              | C   | N6206b  | ×    | -            | 419.15       | 419.15     | 1.0          | -                                                | -     | -     | -       | 31.7                                                   | 39.8 | 8.1   | 25.5    |

Table S.7 – Comparison of experimental and simulated properties (continued)

| $n_{\text{sim}}$ | $n_{\text{iso}}$ | Set | Outlier | code | $T_m$<br>[K] | $T_b$<br>[K] | $T$<br>[K] | $P$<br>[bar] | $\rho_{\text{liq}}[\text{kg}\cdot\text{m}^{-3}]$ |        |       |         | $\Delta H_{\text{vap}}[\text{kJ}\cdot\text{mol}^{-1}]$ |      |       |         |
|------------------|------------------|-----|---------|------|--------------|--------------|------------|--------------|--------------------------------------------------|--------|-------|---------|--------------------------------------------------------|------|-------|---------|
|                  |                  |     |         |      |              |              |            |              | exp                                              | sim    | dev   | err [%] | exp                                                    | sim  | dev   | err [%] |
| 383              | 318              | C   | N6207a  |      | -            | 435.15       | 435.15     | 1.0          | -                                                | -      | -     | -       | 35.8                                                   | 35.0 | -0.8  | -2.2    |
| 384              | 319              | C   | N6208a  |      | -            | 442.15       | 442.15     | 1.0          | -                                                | -      | -     | -       | 37.9                                                   | 37.1 | -0.8  | -2.0    |
| 385              | 320              | C   | N6209a  |      | -            | 431.15       | 431.15     | 1.0          | -                                                | -      | -     | -       | 34.8                                                   | 40.0 | 5.2   | 15.1    |
| 386              | 321              | C   | N6210a  |      | -            | 466.15       | 298.0      | 1.0          | -                                                | -      | -     | -       | 60.9                                                   | 60.1 | -0.8  | -1.4    |
| 387              | 322              | C   | N6211a  |      | 311.95       | 475.04       | 298.0      | 1.0          | -                                                | -      | -     | -       | 63.1                                                   | 62.8 | -0.3  | -0.5    |
| 388              | 323              | C   | D2401a  |      | 353.31       | 494.3        | 354.2      | 0.004        | 1002.0                                           | 1013.8 | 11.8  | 1.2     | -                                                      | -    | -     | -       |
| 389              | 323              | C   | D2401b  | ×    | 353.31       | 494.3        | 396.0      | 1.0          | -                                                | -      | -     | -       | 63.8                                                   | 52.0 | -11.8 | -18.6   |
| 390              | 324              | C   | D3401a  |      | 353.05       | 486.15       | 355.65     | 1.01         | 963.2                                            | 937.6  | -25.6 | -2.6    | -                                                      | -    | -     | -       |
| 391              | 324              | C   | D3401b  | ×    | 353.05       | 486.15       | 390.0      | 1.0          | -                                                | -      | -     | -       | 63.9                                                   | 54.8 | -9.1  | -14.2   |
| 392              | 325              | C   | D4401a  |      | 389.15       | 489.15       | 393.15     | 1.0          | 885.0                                            | 873.0  | -12.0 | -1.4    | -                                                      | -    | -     | -       |
| 393              | 326              | C   | D5402a  |      | 410.15       | 499.15       | 499.15     | 1.0          | -                                                | -      | -     | -       | 43.8                                                   | 50.3 | 6.5   | 14.8    |
| 394              | 327              | C   | D5403a  |      | 377.15       | 498.15       | 383.15     | 1.0          | 873.5                                            | 867.2  | -6.3  | -0.7    | -                                                      | -    | -     | -       |
| 395              | 328              | C   | D6401a  |      | 374.15       | 528.15       | 528.15     | 1.0          | -                                                | -      | -     | -       | 46.6                                                   | 53.0 | 6.4   | 13.7    |
| 396              | 329              | C   | D3301a  |      | 303.75       | 478.15       | 308.15     | 1.01         | 949.7                                            | 949.0  | -0.7  | -0.1    | -                                                      | -    | -     | -       |
| 397              | 329              | C   | D3301b  |      | 303.75       | 478.15       | 348.0      | 1.0          | -                                                | -      | -     | -       | 54.4                                                   | 53.7 | -0.7  | -1.2    |
| 398              | 330              | C   | D4301a  |      | 242.25       | 421.15       | 298.15     | 1.0          | 930.5                                            | 919.6  | -10.9 | -1.2    | 66.6                                                   | 65.2 | -1.4  | -2.1    |
| 399              | 331              | C   | D4302a  |      | -            | 478.15       | 277.15     | 1.0          | 942.0                                            | 958.1  | 16.1  | 1.7     | -                                                      | -    | -     | -       |
| 400              | 331              | C   | D4302b  |      | -            | 478.15       | 298.0      | 1.0          | -                                                | -      | -     | -       | 64.9                                                   | 64.8 | -0.1  | -0.1    |
| 401              | 332              | C   | D5301a  |      | -            | -            | 298.0      | 1.0          | -                                                | -      | -     | -       | 67.1                                                   | 67.3 | 0.2   | 0.2     |
| 402              | 333              | C   | D5302a  |      | -            | -            | 298.0      | 1.0          | -                                                | -      | -     | -       | 66.4                                                   | 66.8 | 0.3   | 0.5     |
| 403              | 334              | C   | D5303a  |      | -            | -            | 298.0      | 1.0          | -                                                | -      | -     | -       | 69.8                                                   | 69.3 | -0.5  | -0.8    |
| 404              | 335              | C   | D6303a  |      | -            | 502.15       | 298.15     | 1.0          | 896.0                                            | 904.9  | 8.9   | 1.0     | 76.1                                                   | 68.2 | -7.9  | -10.4   |
| 405              | 336              | C   | D4201a  |      | 254.15       | 439.25       | 298.15     | 1.01         | 936.7                                            | 940.6  | 3.9   | 0.4     | 50.7                                                   | 50.1 | -0.5  | -1.1    |
| 406              | 337              | C   | D5201a  |      | 228.15       | 444.65       | 298.15     | 1.01         | 920.3                                            | 912.2  | -8.2  | -0.9    | -                                                      | -    | -     | -       |
| 407              | 338              | C   | D6202a  |      | 233.15       | 459.15       | 298.15     | 1.0          | 906.4                                            | 899.4  | -7.0  | -0.8    | -                                                      | -    | -     | -       |
| 408              | 339              | C   | D6203a  |      | -            | 458.65       | 290.15     | 1.0          | 913.0                                            | 899.9  | -13.2 | -1.4    | 53.7                                                   | 54.1 | 0.4   | 0.8     |
| 409              | 340              | V   | O7101a  |      | 184.85       | 378.66       | 298.15     | 1.0          | 736.4                                            | 730.4  | -6.0  | -0.8    | 34.5                                                   | 36.1 | 1.6   | 4.6     |
| 410              | 341              | V   | O7102a  |      | -            | 375.15       | 298.15     | 1.0          | 761.8                                            | 753.8  | -8.0  | -1.0    | 38.2                                                   | 38.9 | 0.7   | 1.8     |
| 411              | 342              | V   | O7103a  |      | -            | 373.15       | 298.15     | 1.0          | 746.7                                            | 734.2  | -12.4 | -1.7    | 37.2                                                   | 37.7 | 0.5   | 1.2     |
| 412              | 343              | V   | O7104a  |      | -            | 371.20       | 298.15     | 1.0          | 734.9                                            | 712.2  | -22.7 | -3.1    | -                                                      | -    | -     | -       |
| 413              | 344              | V   | O7105a  |      | -            | -            | 298.15     | 1.0          | 739.6                                            | 723.8  | -15.8 | -2.1    | -                                                      | -    | -     | -       |
| 414              | 345              | V   | O7106a  |      | -            | 385.65       | 298.15     | 1.0          | 752.1                                            | 737.7  | -14.4 | -1.9    | -                                                      | -    | -     | -       |
| 415              | 346              | V   | O7107a  |      | -            | 378.15       | 298.15     | 1.0          | 744.0                                            | 727.7  | -16.3 | -2.2    | -                                                      | -    | -     | -       |
| 416              | 346              | V   | O7107b  |      | -            | 378.15       | 298.15     | 0.03         | -                                                | -      | -     | -       | 38.1                                                   | 38.5 | 0.4   | 1.1     |
| 417              | 347              | V   | O7108a  |      | -            | -            | 298.15     | 1.0          | 750.1                                            | 733.3  | -16.8 | -2.2    | -                                                      | -    | -     | -       |
| 418              | 348              | V   | O7109a  |      | -            | 380.15       | 298.15     | 1.0          | 746.0                                            | 725.9  | -20.1 | -2.7    | -                                                      | -    | -     | -       |
| 419              | 349              | V   | O7110a  |      | -            | 398.15       | 298.15     | 1.0          | 766.3                                            | 756.6  | -9.7  | -1.3    | -                                                      | -    | -     | -       |
| 420              | 350              | V   | O7111a  |      | -            | 391.15       | 298.15     | 1.0          | 757.2                                            | 743.8  | -13.4 | -1.8    | -                                                      | -    | -     | -       |
| 421              | 351              | V   | O7112a  |      | -            | 390.15       | 298.15     | 1.0          | 754.2                                            | 740.3  | -13.9 | -1.8    | -                                                      | -    | -     | -       |
| 422              | 352              | V   | O8101a  |      | -            | 380.40       | 298.15     | 1.0          | 757.8                                            | 731.0  | -26.8 | -3.5    | 37.6                                                   | 33.9 | -3.7  | -9.9    |
| 423              | 353              | V   | O8102a  |      | -            | -            | 298.0      | 1.0          | -                                                | -      | -     | -       | 41.6                                                   | 40.8 | -0.8  | -1.9    |
| 424              | 354              | V   | O8103a  |      | -            | 439.93       | 298.15     | 1.0          | 748.0                                            | 733.3  | -14.7 | -2.0    | 40.1                                                   | 39.4 | -0.7  | -1.7    |
| 425              | 355              | V   | O8104a  |      | -            | -            | 298.15     | 1.0          | 757.1                                            | 748.5  | -8.6  | -1.1    | -                                                      | -    | -     | -       |
| 426              | 356              | V   | O8105a  |      | -            | -            | 298.15     | 1.0          | 758.1                                            | 744.5  | -13.6 | -1.8    | 42.3                                                   | 42.0 | -0.3  | -0.8    |
| 427              | 357              | V   | O8106a  |      | -            | 395.85       | 298.15     | 1.0          | 745.2                                            | 727.1  | -18.1 | -2.4    | 41.2                                                   | 40.6 | -0.6  | -1.5    |
| 428              | 358              | V   | O8107a  |      | -            | -            | 298.15     | 1.0          | 750.8                                            | 732.0  | -18.9 | -2.5    | -                                                      | -    | -     | -       |
| 429              | 359              | V   | O8108a  |      | -            | -            | 298.15     | 1.0          | 754.5                                            | 732.4  | -22.1 | -2.9    | -                                                      | -    | -     | -       |
| 430              | 360              | V   | O8109a  |      | -            | 394.20       | 298.15     | 1.0          | 758.8                                            | 743.0  | -15.8 | -2.1    | -                                                      | -    | -     | -       |

Table S.7 – Comparison of experimental and simulated properties (continued)

| $n_{\text{sim}}$ | $n_{\text{iso}}$ | Set | Outlier | code | $T_m$<br>[K] | $T_b$<br>[K] | T<br>[K] | P<br>[bar] | $\rho_{\text{liq}}[\text{kg}\cdot\text{m}^{-3}]$ |       |       |         | $\Delta H_{\text{vap}}[\text{kJ}\cdot\text{mol}^{-1}]$ |      |      |         |
|------------------|------------------|-----|---------|------|--------------|--------------|----------|------------|--------------------------------------------------|-------|-------|---------|--------------------------------------------------------|------|------|---------|
|                  |                  |     |         |      |              |              |          |            | exp                                              | sim   | dev   | err [%] | exp                                                    | sim  | dev  | err [%] |
| 431              | 360              | V   | O8109b  |      | -            | 394.20       | 298.15   | 0.02       | -                                                | -     | -     | -       | 40.0                                                   | 41.1 | 1.1  | 2.9     |
| 432              | 361              | V   | O8110a  |      | -            | -            | 298.15   | 1.0        | 760.1                                            | 745.9 | -14.2 | -1.9    | -                                                      | -    | -    | -       |
| 433              | 362              | V   | O8111a  |      | -            | 424.15       | 298.15   | 1.0        | 755.2                                            | 739.8 | -15.4 | -2.0    | -                                                      | -    | -    | -       |
| 434              | 362              | V   | O8111b  |      | -            | 424.15       | 319.77   | 0.01       | -                                                | -     | -     | -       | 42.9                                                   | 41.9 | -1.0 | -2.3    |
| 435              | 363              | V   | O8112a  |      | -            | -            | 298.15   | 1.0        | 761.1                                            | 744.9 | -16.2 | -2.1    | -                                                      | -    | -    | -       |
| 436              | 364              | V   | O8113a  |      | -            | -            | 298.15   | 1.0        | 759.8                                            | 738.6 | -21.2 | -2.8    | -                                                      | -    | -    | -       |
| 437              | 365              | V   | O8114a  |      | -            | 424.15       | 298.15   | 1.0        | 775.6                                            | 765.4 | -10.2 | -1.3    | 46.9                                                   | 47.9 | 1.0  | 2.1     |
| 438              | 366              | V   | O8115a  |      | -            | 415.15       | 298.15   | 1.0        | 768.2                                            | 754.6 | -13.6 | -1.8    | -                                                      | -    | -    | -       |
| 439              | 367              | V   | O8116a  |      | -            | -            | 298.15   | 1.0        | 765.3                                            | 751.6 | -13.7 | -1.8    | -                                                      | -    | -    | -       |
| 440              | 368              | V   | O8117a  |      | 177.15       | 413.44       | 298.15   | 1.0        | 764.1                                            | 750.7 | -13.4 | -1.8    | 44.7                                                   | 45.8 | 1.1  | 2.4     |
| 441              | 369              | V   | O9101a  |      | -            | -            | 298.15   | 1.01       | 792.4                                            | 785.5 | -6.8  | -0.9    | -                                                      | -    | -    | -       |
| 442              | 369              | V   | O9101b  |      | -            | -            | 396.0    | 1.0        | -                                                | -     | -     | -       | 38.5                                                   | 36.9 | -1.6 | -4.1    |
| 443              | 370              | V   | O9102a  |      | -            | -            | 298.15   | 1.0        | 761.6                                            | 747.6 | -14.0 | -1.8    | -                                                      | -    | -    | -       |
| 444              | 371              | V   | O9103a  |      | -            | -            | 298.15   | 1.0        | 766.4                                            | 755.0 | -11.4 | -1.5    | -                                                      | -    | -    | -       |
| 445              | 372              | V   | O9104a  |      | -            | -            | 298.15   | 1.0        | 759.4                                            | 745.1 | -14.3 | -1.9    | -                                                      | -    | -    | -       |
| 446              | 373              | V   | O9105a  |      | -            | -            | 298.15   | 1.0        | 764.3                                            | 748.3 | -16.0 | -2.1    | -                                                      | -    | -    | -       |
| 447              | 374              | V   | O9106a  |      | -            | -            | 298.15   | 1.0        | 767.6                                            | 754.9 | -12.7 | -1.7    | -                                                      | -    | -    | -       |
| 448              | 375              | V   | O9107a  |      | -            | -            | 298.15   | 1.0        | 765.6                                            | 750.1 | -15.5 | -2.0    | -                                                      | -    | -    | -       |
| 449              | 376              | V   | O9108a  |      | -            | -            | 298.15   | 1.0        | 802.1                                            | 767.0 | -35.1 | -4.4    | -                                                      | -    | -    | -       |
| 450              | 377              | V   | O9109a  |      | -            | -            | 298.15   | 1.0        | 768.7                                            | 753.9 | -14.8 | -1.9    | -                                                      | -    | -    | -       |
| 451              | 378              | V   | O9110a  |      | -            | -            | 298.15   | 1.0        | 767.8                                            | 748.9 | -18.9 | -2.5    | -                                                      | -    | -    | -       |
| 452              | 379              | V   | O9111a  |      | -            | -            | 298.15   | 1.0        | 783.0                                            | 772.9 | -10.1 | -1.3    | -                                                      | -    | -    | -       |
| 453              | 380              | V   | O9112a  |      | -            | -            | 298.15   | 1.0        | 775.3                                            | 763.2 | -12.1 | -1.6    | -                                                      | -    | -    | -       |
| 454              | 381              | V   | O9113a  |      | -            | -            | 298.15   | 1.0        | 773.0                                            | 760.0 | -12.9 | -1.7    | -                                                      | -    | -    | -       |
| 455              | 382              | V   | O9114a  |      | -            | -            | 298.15   | 1.0        | 772.7                                            | 760.0 | -12.7 | -1.6    | -                                                      | -    | -    | -       |
| 456              | 383              | V   | O0101a  |      | -            | -            | 298.0    | 1.0        | -                                                | -     | -     | -       | 45.3                                                   | 46.2 | 0.9  | 1.9     |
| 457              | 384              | V   | O0102a  |      | -            | -            | 298.0    | 1.0        | -                                                | -     | -     | -       | 53.2                                                   | 51.6 | -1.6 | -3.0    |
| 458              | 385              | V   | O0103a  |      | -            | -            | 293.15   | 1.0        | 784.8                                            | 774.6 | -10.2 | -1.3    | -                                                      | -    | -    | -       |
| 459              | 386              | V   | O0104a  |      | -            | 445.65       | 298.15   | 1.0        | 771.5                                            | 758.6 | -12.9 | -1.7    | 51.4                                                   | 52.1 | 0.7  | 1.3     |
| 460              | 387              | V   | O0105a  |      | -            | -            | 293.15   | 1.0        | 777.8                                            | 766.9 | -10.9 | -1.4    | -                                                      | -    | -    | -       |
| 461              | 388              | V   | O0106a  |      | -            | -            | 298.15   | 1.0        | 775.1                                            | 763.1 | -12.0 | -1.5    | -                                                      | -    | -    | -       |
| 462              | 389              | V   | O0107a  |      | -            | -            | 298.15   | 1.0        | 771.2                                            | 758.0 | -13.2 | -1.7    | -                                                      | -    | -    | -       |
| 463              | 390              | V   | O0108a  |      | -            | -            | 298.15   | 1.0        | 782.1                                            | 766.7 | -15.4 | -2.0    | -                                                      | -    | -    | -       |
| 464              | 391              | V   | O0109a  |      | -            | -            | 293.15   | 1.0        | 787.4                                            | 766.9 | -20.5 | -2.6    | -                                                      | -    | -    | -       |
| 465              | 392              | V   | O0110a  |      | -            | -            | 298.15   | 1.0        | 775.8                                            | 762.1 | -13.7 | -1.8    | -                                                      | -    | -    | -       |
| 466              | 393              | V   | O0111a  |      | -            | -            | 298.15   | 1.0        | 773.6                                            | 757.2 | -16.4 | -2.1    | -                                                      | -    | -    | -       |
| 467              | 394              | V   | O0112a  |      | -            | -            | 298.15   | 1.0        | 788.6                                            | 778.9 | -9.7  | -1.2    | -                                                      | -    | -    | -       |
| 468              | 395              | V   | O0113a  |      | -            | -            | 298.15   | 1.0        | 782.3                                            | 770.0 | -12.3 | -1.6    | -                                                      | -    | -    | -       |
| 469              | 396              | V   | O0114a  |      | -            | -            | 298.15   | 1.0        | 779.8                                            | 767.4 | -12.4 | -1.6    | -                                                      | -    | -    | -       |
| 470              | 397              | V   | O0115a  |      | -            | -            | 298.15   | 1.0        | 778.8                                            | 767.1 | -11.7 | -1.5    | 53.2                                                   | 55.4 | 2.2  | 4.2     |
| 471              | 398              | V   | O0116a  |      | 203.95       | 460.15       | 298.15   | 1.0        | 779.2                                            | 766.9 | -12.3 | -1.6    | -                                                      | -    | -    | -       |
| 472              | 398              | V   | O0116b  |      | 203.95       | 460.15       | 388.0    | 1.0        | -                                                | -     | -     | -       | 46.2                                                   | 48.7 | 2.5  | 5.5     |
| 473              | 399              | V   | O7201a  |      | -            | 404.65       | 404.65   | 1.0        | -                                                | -     | -     | -       | 34.8                                                   | 38.9 | 4.1  | 11.8    |
| 474              | 400              | V   | O7202a  |      | -            | 387.15       | 298.15   | 1.0        | 868.8                                            | 804.6 | -64.2 | -7.4    | 43.9                                                   | 44.1 | 0.2  | 0.6     |
| 475              | 401              | V   | O7203a  |      | -            | -            | 298.15   | 1.0        | 813.7                                            | 767.4 | -46.3 | -5.7    | -                                                      | -    | -    | -       |
| 476              | 402              | V   | O7204a  |      | -            | 396.15       | 293.15   | 1.0        | 825.0                                            | 793.2 | -31.8 | -3.9    | -                                                      | -    | -    | -       |
| 477              | 402              | V   | O7204b  |      | -            | 396.15       | 396.15   | 1.0        | -                                                | -     | -     | -       | 34.0                                                   | 34.6 | 0.6  | 1.8     |
| 478              | 403              | V   | O7205a  |      | -            | -            | 298.15   | 1.0        | 851.6                                            | 836.9 | -14.8 | -1.7    | -                                                      | -    | -    | -       |

Table S.7 – Comparison of experimental and simulated properties (continued)

| $n_{\text{sim}}$ | $n_{\text{iso}}$ | Set | Outlier | code | $T_m$<br>[K] | $T_b$<br>[K] | T<br>[K] | P<br>[bar] | $\rho_{\text{liq}}[\text{kg}\cdot\text{m}^{-3}]$ |       |       |         | $\Delta H_{\text{vap}}[\text{kJ}\cdot\text{mol}^{-1}]$ |      |      |         |
|------------------|------------------|-----|---------|------|--------------|--------------|----------|------------|--------------------------------------------------|-------|-------|---------|--------------------------------------------------------|------|------|---------|
|                  |                  |     |         |      |              |              |          |            | exp                                              | sim   | dev   | err [%] | exp                                                    | sim  | dev  | err [%] |
| 479              | 404              | V   | O7206a  |      | -            | 420.08       | 298.15   | 1.0        | 840.9                                            | 819.0 | -21.9 | -2.6    | 47.8                                                   | 47.3 | -0.5 | -1.0    |
| 480              | 405              | V   | O7207a  |      | -            | -            | 298.15   | 1.0        | 840.3                                            | 815.9 | -24.4 | -2.9    | -                                                      | -    | -    | -       |
| 481              | 406              | V   | O7208a  |      | -            | -            | 298.15   | 1.0        | 831.2                                            | 806.4 | -24.8 | -3.0    | 45.9                                                   | 45.6 | -0.3 | -0.7    |
| 482              | 407              | V   | O7209a  |      | 175.85       | 413.65       | 293.15   | 1.0        | 834.5                                            | 797.8 | -36.8 | -4.4    | -                                                      | -    | -    | -       |
| 483              | 407              | V   | O7209b  |      | 175.85       | 413.65       | 413.65   | 1.0        | -                                                | -     | -     | -       | 35.6                                                   | 34.8 | -0.8 | -2.4    |
| 484              | 408              | V   | O7210a  |      | -            | -            | 298.15   | 1.0        | 832.7                                            | 808.4 | -24.3 | -2.9    | 46.8                                                   | 46.5 | -0.3 | -0.7    |
| 485              | 409              | V   | O8201a  |      | -            | -            | 298.15   | 1.0        | 852.7                                            | 829.7 | -23.0 | -2.7    | -                                                      | -    | -    | -       |
| 486              | 410              | V   | O8202a  |      | -            | 421.15       | 421.15   | 1.0        | -                                                | -     | -     | -       | 36.4                                                   | 40.3 | 4.0  | 10.9    |
| 487              | 411              | V   | O8203a  |      | -            | 416.50       | 416.5    | 1.0        | -                                                | -     | -     | -       | 35.9                                                   | 37.5 | 1.6  | 4.4     |
| 488              | 412              | V   | O8204a  |      | -            | 478.13       | 298.15   | 1.0        | 825.6                                            | 781.5 | -44.0 | -5.3    | -                                                      | -    | -    | -       |
| 489              | 413              | V   | O8205a  |      | -            | -            | 298.15   | 1.0        | 851.8                                            | 836.4 | -15.4 | -1.8    | -                                                      | -    | -    | -       |
| 490              | 414              | V   | O8206a  |      | -            | -            | 298.15   | 1.0        | 843.3                                            | 825.1 | -18.2 | -2.2    | -                                                      | -    | -    | -       |
| 491              | 415              | V   | O8207a  |      | -            | -            | 298.15   | 1.0        | 840.7                                            | 821.2 | -19.5 | -2.3    | -                                                      | -    | -    | -       |
| 492              | 416              | V   | O8208a  |      | -            | -            | 298.15   | 1.0        | 833.5                                            | 812.8 | -20.8 | -2.5    | -                                                      | -    | -    | -       |
| 493              | 417              | V   | O8209a  |      | -            | 434.03       | 298.15   | 1.0        | 833.1                                            | 809.9 | -23.2 | -2.8    | 50.9                                                   | 50.7 | -0.2 | -0.3    |
| 494              | 418              | V   | O8210a  |      | -            | 478.13       | 298.15   | 1.0        | 831.2                                            | 806.5 | -24.7 | -3.0    | 50.6                                                   | 49.9 | -0.8 | -1.5    |
| 495              | 419              | V   | O9201a  |      | -            | 438.65       | 298.15   | 1.0        | 820.3                                            | 780.9 | -39.4 | -4.8    | -                                                      | -    | -    | -       |
| 496              | 419              | V   | O9201b  |      | -            | 438.65       | 438.65   | 1.0        | -                                                | -     | -     | -       | 38.0                                                   | 37.2 | -0.8 | -2.1    |
| 497              | 420              | V   | O9202a  |      | -            | 520.68       | 295.15   | 1.0        | 829.0                                            | 801.9 | -27.1 | -3.3    | -                                                      | -    | -    | -       |
| 498              | 421              | V   | O9203a  |      | -            | -            | 298.15   | 1.0        | 844.0                                            | 826.0 | -18.0 | -2.1    | -                                                      | -    | -    | -       |
| 499              | 422              | V   | O9204a  |      | -            | -            | 298.15   | 1.0        | 838.6                                            | 815.8 | -22.8 | -2.7    | -                                                      | -    | -    | -       |
| 500              | 423              | V   | O9205a  |      | -            | -            | 298.15   | 1.0        | 840.6                                            | 821.7 | -18.9 | -2.2    | -                                                      | -    | -    | -       |
| 501              | 424              | V   | O9206a  |      | 214.15       | 452.35       | 298.15   | 1.0        | 831.5                                            | 800.5 | -31.0 | -3.7    | 48.1                                                   | 50.7 | 2.6  | 5.3     |
| 502              | 425              | V   | O9207a  |      | -            | -            | 298.0    | 1.0        | -                                                | -     | -     | -       | 54.7                                                   | 54.1 | -0.6 | -1.1    |
| 503              | 426              | V   | O0201a  |      | -            | 444.45       | 298.15   | 1.0        | 816.8                                            | 770.2 | -46.6 | -5.7    | -                                                      | -    | -    | -       |
| 504              | 426              | V   | O0201b  |      | -            | 444.45       | 351.0    | 1.0        | -                                                | -     | -     | -       | 46.1                                                   | 44.2 | -1.9 | -4.2    |
| 505              | 427              | V   | O0203a  |      | -            | 415.43       | 298.15   | 1.0        | 829.0                                            | 790.5 | -38.5 | -4.6    | 57.8                                                   | 53.0 | -4.8 | -8.4    |
| 506              | 428              | V   | O0204a  |      | -            | -            | 298.15   | 1.0        | 840.9                                            | 823.4 | -17.5 | -2.1    | -                                                      | -    | -    | -       |
| 507              | 429              | V   | O0205a  |      | -            | -            | 293.15   | 1.0        | 840.9                                            | 814.7 | -26.2 | -3.1    | -                                                      | -    | -    | -       |
| 508              | 430              | V   | O0206a  |      | 204.05       | 476.45       | 298.15   | 1.0        | 833.7                                            | 809.2 | -24.5 | -2.9    | 58.8                                                   | 58.4 | -0.5 | -0.8    |
| 509              | 431              | V   | O7301a  | ×    | -            | 426.15       | 426.15   | 1.0        | -                                                | -     | -     | -       | 36.8                                                   | 45.1 | 8.3  | 22.4    |
| 510              | 432              | V   | O7302a  |      | -            | 419.15       | 419.15   | 1.0        | -                                                | -     | -     | -       | 36.2                                                   | 38.7 | 2.5  | 6.9     |
| 511              | 433              | V   | O7303a  |      | -            | 430.15       | 430.15   | 1.0        | -                                                | -     | -     | -       | 37.2                                                   | 41.4 | 4.2  | 11.2    |
| 512              | 434              | V   | O7304a  |      | -            | 419.15       | 419.15   | 1.0        | -                                                | -     | -     | -       | 36.2                                                   | 39.5 | 3.3  | 9.1     |
| 513              | 435              | V   | O7305a  |      | -            | 416.15       | 298.15   | 1.0        | 893.8                                            | 838.2 | -55.6 | -6.2    | 47.8                                                   | 45.7 | -2.1 | -4.5    |
| 514              | 436              | V   | O7306a  |      | -            | 416.90       | 293.15   | 1.0        | 922.9                                            | 895.0 | -27.9 | -3.0    | -                                                      | -    | -    | -       |
| 515              | 437              | V   | O8301a  |      | -            | 438.15       | 438.15   | 1.0        | -                                                | -     | -     | -       | 38.0                                                   | 40.9 | 2.9  | 7.7     |
| 516              | 438              | V   | O8302a  |      | -            | 418.15       | 298.15   | 1.0        | 884.7                                            | 852.6 | -32.1 | -3.6    | -                                                      | -    | -    | -       |
| 517              | 438              | V   | O8302b  |      | -            | 418.15       | 418.15   | 1.0        | -                                                | -     | -     | -       | 36.1                                                   | 40.7 | 4.6  | 12.8    |
| 518              | 439              | V   | O8303a  |      | 228.85       | 462.15       | 298.15   | 1.0        | 903.3                                            | 872.1 | -31.2 | -3.5    | 56.4                                                   | 58.6 | 2.2  | 4.0     |
| 519              | 440              | V   | O9301a  |      | -            | 444.15       | 444.15   | 1.0        | -                                                | -     | -     | -       | 38.5                                                   | 40.9 | 2.4  | 6.1     |
| 520              | 441              | V   | O0301a  |      | -            | 440.15       | 293.15   | 1.0        | 862.1                                            | 809.6 | -52.5 | -6.1    | -                                                      | -    | -    | -       |
| 521              | 441              | V   | O0301b  |      | -            | 440.15       | 440.15   | 1.0        | -                                                | -     | -     | -       | 38.2                                                   | 38.9 | 0.8  | 2.0     |
| 522              | 442              | V   | O0303a  |      | -            | 467.15       | 467.15   | 1.0        | -                                                | -     | -     | -       | 40.7                                                   | 42.3 | 1.5  | 3.7     |
| 523              | 443              | V   | O0304a  |      | -            | -            | 288.15   | 1.0        | 886.9                                            | 865.0 | -21.9 | -2.5    | -                                                      | -    | -    | -       |
| 524              | 444              | V   | O7401a  |      | -            | 456.15       | 298.15   | 1.0        | 997.0                                            | 941.3 | -55.7 | -5.6    | -                                                      | -    | -    | -       |
| 525              | 445              | V   | O7402a  |      | -            | -            | 298.0    | 1.0        | -                                                | -     | -     | -       | 53.6                                                   | 55.3 | 1.7  | 3.1     |
| 526              | 446              | V   | O8401a  |      | 229.35       | 489.15       | 293.15   | 1.0        | 986.0                                            | 954.9 | -31.1 | -3.2    | -                                                      | -    | -    | -       |

Table S.7 – Comparison of experimental and simulated properties (continued)

| $n_{\text{sim}}$ | $n_{\text{iso}}$ | Set | Outlier | code | $T_m$<br>[K] | $T_b$<br>[K] | T<br>[K] | P<br>[bar] | $\rho_{\text{liq}}[\text{kg}\cdot\text{m}^{-3}]$ |       |       |         | $\Delta H_{\text{vap}}[\text{kJ}\cdot\text{mol}^{-1}]$ |      |      |         |
|------------------|------------------|-----|---------|------|--------------|--------------|----------|------------|--------------------------------------------------|-------|-------|---------|--------------------------------------------------------|------|------|---------|
|                  |                  |     |         |      |              |              |          |            | exp                                              | sim   | dev   | err [%] | exp                                                    | sim  | dev  | err [%] |
| 527              | 446              | V   | O8401b  |      | 229.35       | 489.15       | 489.15   | 1.0        | -                                                | -     | -     | -       | 50.9                                                   | 51.0 | 0.1  | 0.2     |
| 528              | 447              | V   | O9401a  |      | -            | 432.65       | 293.15   | 1.0        | 918.6                                            | 883.2 | -35.4 | -3.9    | 52.9                                                   | 54.8 | 1.9  | 3.5     |
| 529              | 448              | V   | A7102a  |      | -            | -            | 298.15   | 1.0        | 829.5                                            | 806.3 | -23.2 | -2.8    | -                                                      | -    | -    | -       |
| 530              | 449              | V   | A7104a  |      | -            | -            | 298.15   | 1.0        | 823.1                                            | 815.0 | -8.1  | -1.0    | -                                                      | -    | -    | -       |
| 531              | 449              | V   | A7104b  |      | -            | -            | 334.0    | 1.0        | -                                                | -     | -     | -       | 42.4                                                   | 43.3 | 0.9  | 2.2     |
| 532              | 450              | V   | A7107a  |      | -            | 416.15       | 298.15   | 1.0        | 814.3                                            | 809.4 | -5.0  | -0.6    | -                                                      | -    | -    | -       |
| 533              | 450              | V   | A7107b  |      | -            | 416.15       | 329.0    | 1.0        | -                                                | -     | -     | -       | 42.8                                                   | 44.5 | 1.7  | 3.9     |
| 534              | 451              | V   | A7108a  |      | -            | -            | 298.15   | 1.0        | 824.0                                            | 812.0 | -12.0 | -1.5    | -                                                      | -    | -    | -       |
| 535              | 452              | V   | A7109a  |      | -            | -            | 293.15   | 1.0        | 820.6                                            | 805.9 | -14.7 | -1.8    | -                                                      | -    | -    | -       |
| 536              | 453              | V   | A7110a  |      | 229.21       | 425.95       | 298.15   | 1.0        | 813.3                                            | 806.3 | -7.0  | -0.9    | 48.0                                                   | 48.5 | 0.5  | 0.9     |
| 537              | 454              | V   | A8101a  |      | -            | -            | 293.15   | 1.0        | 847.6                                            | 811.2 | -36.4 | -4.3    | -                                                      | -    | -    | -       |
| 538              | 455              | V   | A8102a  |      | -            | -            | 293.15   | 1.0        | 847.6                                            | 813.6 | -34.0 | -4.0    | -                                                      | -    | -    | -       |
| 539              | 456              | V   | A8103a  |      | -            | 433.15       | 329.07   | 0.01       | 802.4                                            | 784.4 | -18.0 | -2.2    | -                                                      | -    | -    | -       |
| 540              | 457              | V   | A8104a  |      | -            | 433.80       | 298.15   | 1.0        | 815.2                                            | 807.3 | -7.9  | -1.0    | -                                                      | -    | -    | -       |
| 541              | 457              | V   | A8104b  |      | -            | 433.80       | 329.59   | 0.01       | -                                                | -     | -     | -       | 44.7                                                   | 47.9 | 3.3  | 7.3     |
| 542              | 458              | V   | A8109a  |      | -            | 447.15       | 298.15   | 1.01       | 821.1                                            | 810.3 | -10.8 | -1.3    | 51.0                                                   | 53.3 | 2.3  | 4.4     |
| 543              | 459              | V   | A9101a  |      | -            | -            | 298.15   | 1.0        | 827.0                                            | 829.2 | 2.2   | 0.3     | -                                                      | -    | -    | -       |
| 544              | 460              | V   | A9102a  |      | -            | 456.62       | 347.35   | 0.01       | 779.0                                            | 790.3 | 11.3  | 1.4     | -                                                      | -    | -    | -       |
| 545              | 461              | V   | A9103a  |      | -            | -            | 291.15   | 1.0        | 884.3                                            | 825.8 | -58.5 | -6.6    | -                                                      | -    | -    | -       |
| 546              | 462              | V   | A9104a  |      | -            | -            | 293.15   | 1.0        | 848.3                                            | 821.7 | -26.6 | -3.1    | -                                                      | -    | -    | -       |
| 547              | 463              | V   | A9105a  |      | -            | -            | 293.15   | 1.0        | 842.3                                            | 815.4 | -26.9 | -3.2    | -                                                      | -    | -    | -       |
| 548              | 464              | V   | A9106a  |      | -            | 456.62       | 347.53   | 0.01       | 785.4                                            | 767.0 | -18.3 | -2.3    | -                                                      | -    | -    | -       |
| 549              | 465              | V   | A9109a  |      | -            | 468.15       | 298.15   | 1.01       | 831.0                                            | 813.5 | -17.5 | -2.1    | 55.3                                                   | 58.0 | 2.8  | 5.0     |
| 550              | 466              | V   | A0101a  |      | -            | -            | 293.15   | 1.0        | 843.0                                            | 824.3 | -18.7 | -2.2    | -                                                      | -    | -    | -       |
| 551              | 467              | V   | A0103a  |      | -            | 403.15       | 298.15   | 1.0        | 813.4                                            | 813.3 | -0.1  | -0.0    | -                                                      | -    | -    | -       |
| 552              | 467              | V   | A0103b  | ×    | -            | 403.15       | 403.15   | 1.0        | -                                                | -     | -     | -       | 24.3                                                   | 50.8 | 26.5 | 109.3   |
| 553              | 468              | V   | A0107a  |      | -            | 488.15       | 298.15   | 1.0        | 824.9                                            | 816.1 | -8.8  | -1.1    | 59.5                                                   | 62.9 | 3.4  | 5.7     |
| 554              | 469              | V   | K7101a  |      | -            | 403.75       | 294.15   | 1.0        | 823.0                                            | 830.6 | 7.6   | 0.9     | -                                                      | -    | -    | -       |
| 555              | 469              | V   | K7101b  |      | -            | 403.75       | 300.55   | 0.01       | -                                                | -     | -     | -       | 40.7                                                   | 42.4 | 1.7  | 4.2     |
| 556              | 470              | V   | K7102a  |      | 228.15       | 398.15       | 298.15   | 1.0        | 808.4                                            | 804.3 | -4.1  | -0.5    | 42.3                                                   | 40.8 | -1.5 | -3.5    |
| 557              | 471              | V   | K7103a  |      | 209.15       | 398.15       | 298.15   | 1.0        | 801.2                                            | 811.2 | 10.0  | 1.2     | -                                                      | -    | -    | -       |
| 558              | 471              | V   | K7103b  |      | 209.15       | 398.15       | 298.15   | 0.02       | -                                                | -     | -     | -       | 39.7                                                   | 42.5 | 2.7  | 6.9     |
| 559              | 472              | V   | K7104a  |      | 204.75       | 397.55       | 298.15   | 1.0        | 799.7                                            | 780.6 | -19.1 | -2.4    | 41.5                                                   | 41.1 | -0.4 | -0.9    |
| 560              | 473              | V   | K7105a  |      | -            | 405.15       | 293.15   | 1.0        | 827.3                                            | 813.8 | -13.5 | -1.6    | -                                                      | -    | -    | -       |
| 561              | 473              | V   | K7105b  |      | -            | 405.15       | 301.67   | 0.01       | -                                                | -     | -     | -       | 41.4                                                   | 43.7 | 2.4  | 5.7     |
| 562              | 474              | V   | K7106a  |      | -            | 409.15       | 298.15   | 1.0        | 824.0                                            | 797.3 | -26.7 | -3.2    | -                                                      | -    | -    | -       |
| 563              | 475              | V   | K7107a  |      | -            | 406.15       | 302.47   | 0.01       | 809.5                                            | 784.8 | -24.7 | -3.0    | 41.1                                                   | 43.5 | 2.3  | 5.6     |
| 564              | 476              | V   | K7108a  |      | -            | 411.15       | 295.15   | 1.0        | 815.3                                            | 813.9 | -1.4  | -0.2    | -                                                      | -    | -    | -       |
| 565              | 476              | V   | K7108b  |      | -            | 411.15       | 306.47   | 0.01       | -                                                | -     | -     | -       | 41.7                                                   | 44.4 | 2.7  | 6.4     |
| 566              | 477              | V   | K7109a  |      | -            | 413.15       | 298.15   | 1.0        | 828.0                                            | 806.0 | -22.1 | -2.7    | -                                                      | -    | -    | -       |
| 567              | 477              | V   | K7109b  |      | -            | 413.15       | 308.07   | 0.01       | -                                                | -     | -     | -       | 41.8                                                   | 44.7 | 2.9  | 6.9     |
| 568              | 478              | V   | K7110a  |      | -            | 409.15       | 293.15   | 1.0        | 812.0                                            | 796.2 | -15.8 | -1.9    | -                                                      | -    | -    | -       |
| 569              | 478              | V   | K7110b  |      | -            | 409.15       | 304.87   | 0.01       | -                                                | -     | -     | -       | 41.6                                                   | 43.6 | 2.0  | 4.9     |
| 570              | 479              | V   | K7111a  |      | -            | 412.15       | 298.15   | 1.0        | 808.5                                            | 810.8 | 2.3   | 0.3     | -                                                      | -    | -    | -       |
| 571              | 479              | V   | K7111b  |      | -            | 412.15       | 307.27   | 0.01       | -                                                | -     | -     | -       | 42.0                                                   | 45.3 | 3.2  | 7.7     |
| 572              | 480              | V   | K7112a  |      | -            | 417.95       | 293.15   | 1.0        | 811.6                                            | 807.2 | -4.4  | -0.5    | -                                                      | -    | -    | -       |
| 573              | 480              | V   | K7112b  |      | -            | 417.95       | 311.91   | 0.01       | -                                                | -     | -     | -       | 42.2                                                   | 45.6 | 3.4  | 8.1     |
| 574              | 481              | V   | K7113a  |      | 241.05       | 417.15       | 298.15   | 1.0        | 811.6                                            | 798.4 | -13.2 | -1.6    | -                                                      | -    | -    | -       |



Table S.7 – Comparison of experimental and simulated properties (continued)

| $n_{\text{sim}}$ | $n_{\text{iso}}$ | Set | Outlier | code | $T_m$<br>[K] | $T_b$<br>[K] | T<br>[K] | P<br>[bar] | $\rho_{\text{liq}}[\text{kg}\cdot\text{m}^{-3}]$ |       |       |         | $\Delta H_{\text{vap}}[\text{kJ}\cdot\text{mol}^{-1}]$ |      |      |         |
|------------------|------------------|-----|---------|------|--------------|--------------|----------|------------|--------------------------------------------------|-------|-------|---------|--------------------------------------------------------|------|------|---------|
|                  |                  |     |         |      |              |              |          |            | exp                                              | sim   | dev   | err [%] | exp                                                    | sim  | dev  | err [%] |
| 575              | 481              | V   | K7113b  |      | 241.05       | 417.15       | 311.27   | 0.01       | -                                                | -     | -     | -       | 42.9                                                   | 45.6 | 2.7  | 6.3     |
| 576              | 482              | V   | K7114a  |      | 235.95       | 420.55       | 298.15   | 1.0        | 814.6                                            | 799.7 | -15.0 | -1.8    | -                                                      | -    | -    | -       |
| 577              | 482              | V   | K7114b  |      | 235.95       | 420.55       | 313.99   | 0.01       | -                                                | -     | -     | -       | 43.2                                                   | 45.4 | 2.2  | 5.2     |
| 578              | 483              | V   | K7115a  |      | 238.45       | 424.05       | 298.15   | 1.0        | 811.6                                            | 808.5 | -3.1  | -0.4    | 46.1                                                   | 48.2 | 2.1  | 4.5     |
| 579              | 484              | V   | K8101a  |      | -            | -            | 293.15   | 1.0        | 839.5                                            | 851.1 | 11.6  | 1.4     | -                                                      | -    | -    | -       |
| 580              | 485              | V   | K8102a  |      | -            | 408.25       | 298.15   | 1.0        | 802.3                                            | 805.7 | 3.4   | 0.4     | 43.3                                                   | 43.3 | 0.0  | 0.1     |
| 581              | 486              | V   | K8103a  |      | -            | -            | 293.15   | 1.0        | 826.0                                            | 838.6 | 12.6  | 1.5     | -                                                      | -    | -    | -       |
| 582              | 487              | V   | K8104a  |      | -            | 426.60       | 293.15   | 1.0        | 838.9                                            | 848.2 | 9.3   | 1.1     | -                                                      | -    | -    | -       |
| 583              | 487              | V   | K8104b  |      | -            | 426.60       | 318.83   | 0.01       | -                                                | -     | -     | -       | 43.6                                                   | 46.0 | 2.4  | 5.6     |
| 584              | 488              | V   | K8105a  |      | -            | 421.15       | 293.15   | 1.0        | 829.8                                            | 828.5 | -1.4  | -0.2    | -                                                      | -    | -    | -       |
| 585              | 488              | V   | K8105b  |      | -            | 421.15       | 314.47   | 0.01       | -                                                | -     | -     | -       | 43.2                                                   | 44.9 | 1.7  | 4.0     |
| 586              | 489              | V   | K8106a  |      | -            | 420.15       | 293.15   | 1.0        | 825.7                                            | 835.8 | 10.1  | 1.2     | -                                                      | -    | -    | -       |
| 587              | 490              | V   | K8107a  |      | -            | 419.15       | 298.15   | 1.0        | 810.5                                            | 807.7 | -2.8  | -0.3    | -                                                      | -    | -    | -       |
| 588              | 490              | V   | K8107b  |      | -            | 419.15       | 312.87   | 0.01       | -                                                | -     | -     | -       | 42.3                                                   | 44.6 | 2.2  | 5.3     |
| 589              | 491              | V   | K8108a  |      | -            | -            | 293.15   | 1.0        | 829.0                                            | 835.4 | 6.4   | 0.8     | -                                                      | -    | -    | -       |
| 590              | 492              | V   | K8109a  |      | -            | -            | 293.15   | 1.0        | 812.0                                            | 811.5 | -0.6  | -0.1    | -                                                      | -    | -    | -       |
| 591              | 493              | V   | K8110a  |      | -            | -            | 365.0    | 1.0        | -                                                | -     | -     | -       | 42.5                                                   | 41.9 | -0.6 | -1.4    |
| 592              | 494              | V   | K8111a  |      | -            | 420.65       | 293.15   | 1.0        | 812.1                                            | 790.5 | -21.6 | -2.7    | -                                                      | -    | -    | -       |
| 593              | 494              | V   | K8111b  |      | -            | 420.65       | 314.07   | 0.01       | -                                                | -     | -     | -       | 42.6                                                   | 45.0 | 2.4  | 5.7     |
| 594              | 495              | V   | K8112a  |      | -            | 427.65       | 319.67   | 0.01       | 791.0                                            | 804.4 | 13.4  | 1.7     | 43.5                                                   | 46.8 | 3.3  | 7.7     |
| 595              | 496              | V   | K8113a  |      | -            | 431.15       | 295.15   | 1.0        | 829.5                                            | 825.4 | -4.1  | -0.5    | -                                                      | -    | -    | -       |
| 596              | 496              | V   | K8113b  |      | -            | 431.15       | 322.47   | 0.01       | -                                                | -     | -     | -       | 44.1                                                   | 47.3 | 3.1  | 7.1     |
| 597              | 497              | V   | K8114a  |      | -            | 426.15       | 298.15   | 1.0        | 817.0                                            | 801.0 | -16.0 | -2.0    | -                                                      | -    | -    | -       |
| 598              | 498              | V   | K8115a  |      | -            | -            | 298.15   | 1.0        | 820.0                                            | 803.6 | -16.4 | -2.0    | -                                                      | -    | -    | -       |
| 599              | 499              | V   | K8116a  |      | -            | 431.15       | 293.15   | 1.0        | 817.5                                            | 797.9 | -19.6 | -2.4    | -                                                      | -    | -    | -       |
| 600              | 499              | V   | K8116b  |      | -            | 431.15       | 322.47   | 0.01       | -                                                | -     | -     | -       | 44.1                                                   | 46.8 | 2.7  | 6.1     |
| 601              | 500              | V   | K8117a  |      | -            | 437.15       | 327.27   | 0.01       | 794.2                                            | 786.5 | -7.7  | -1.0    | 43.8                                                   | 48.0 | 4.2  | 9.6     |
| 602              | 501              | V   | K8118a  |      | -            | 435.14       | 297.15   | 1.0        | 829.0                                            | 806.7 | -22.3 | -2.7    | -                                                      | -    | -    | -       |
| 603              | 501              | V   | K8118b  |      | -            | 435.14       | 322.36   | 0.01       | -                                                | -     | -     | -       | 44.4                                                   | 47.3 | 2.9  | 6.4     |
| 604              | 502              | V   | K8119a  |      | -            | 427.15       | 295.15   | 1.0        | 813.0                                            | 798.5 | -14.5 | -1.8    | -                                                      | -    | -    | -       |
| 605              | 502              | V   | K8119b  |      | -            | 427.15       | 319.27   | 0.01       | -                                                | -     | -     | -       | 43.5                                                   | 47.3 | 3.8  | 8.8     |
| 606              | 503              | V   | K8120a  |      | -            | 437.15       | 293.15   | 1.0        | 830.4                                            | 803.1 | -27.3 | -3.3    | -                                                      | -    | -    | -       |
| 607              | 504              | V   | K8122a  |      | -            | 437.00       | 298.15   | 1.0        | 811.0                                            | 816.5 | 5.5   | 0.7     | -                                                      | -    | -    | -       |
| 608              | 504              | V   | K8122b  |      | -            | 437.00       | 327.15   | 0.01       | -                                                | -     | -     | -       | 44.2                                                   | 49.5 | 5.3  | 11.9    |
| 609              | 505              | V   | K8123a  |      | -            | 440.15       | 298.15   | 1.0        | 810.0                                            | 807.7 | -2.3  | -0.3    | -                                                      | -    | -    | -       |
| 610              | 505              | V   | K8123b  |      | -            | 440.15       | 329.67   | 0.01       | -                                                | -     | -     | -       | 46.3                                                   | 49.1 | 2.8  | 6.0     |
| 611              | 506              | V   | K8124a  |      | -            | 436.15       | 298.15   | 1.0        | 814.7                                            | 802.8 | -11.9 | -1.5    | -                                                      | -    | -    | -       |
| 612              | 506              | V   | K8124b  |      | -            | 436.15       | 326.47   | 0.01       | -                                                | -     | -     | -       | 45.5                                                   | 49.2 | 3.7  | 8.2     |
| 613              | 507              | V   | K8125a  |      | -            | 440.65       | 298.15   | 1.0        | 822.0                                            | 804.1 | -17.9 | -2.2    | -                                                      | -    | -    | -       |
| 614              | 507              | V   | K8125b  |      | -            | 440.65       | 308.0    | 1.0        | -                                                | -     | -     | -       | 43.8                                                   | 50.5 | 6.7  | 15.3    |
| 615              | 508              | V   | K8126a  |      | 252.84       | 445.75       | 298.15   | 1.0        | 815.2                                            | 811.8 | -3.5  | -0.4    | 51.8                                                   | 52.9 | 1.1  | 2.2     |
| 616              | 509              | V   | K9101a  |      | 247.95       | 425.15       | 298.15   | 1.0        | 820.2                                            | 831.9 | 11.7  | 1.4     | 45.4                                                   | 45.6 | 0.2  | 0.4     |
| 617              | 510              | V   | K9102a  |      | -            | -            | 296.15   | 1.0        | 812.0                                            | 806.5 | -5.5  | -0.7    | -                                                      | -    | -    | -       |
| 618              | 511              | V   | K9103a  |      | -            | -            | 293.15   | 1.0        | 816.8                                            | 815.0 | -1.8  | -0.2    | -                                                      | -    | -    | -       |
| 619              | 512              | V   | K9104a  |      | -            | -            | 298.15   | 1.0        | 809.0                                            | 809.4 | 0.4   | 0.1     | -                                                      | -    | -    | -       |
| 620              | 513              | V   | K9105a  |      | -            | 435.15       | 287.15   | 1.0        | 826.0                                            | 814.5 | -11.5 | -1.4    | -                                                      | -    | -    | -       |
| 621              | 513              | V   | K9105b  |      | -            | 435.15       | 325.67   | 0.01       | -                                                | -     | -     | -       | 44.2                                                   | 48.9 | 4.7  | 10.6    |
| 622              | 514              | V   | K9106a  |      | -            | 445.00       | 298.15   | 1.0        | 813.5                                            | 793.9 | -19.6 | -2.4    | -                                                      | -    | -    | -       |

Table S.7 – Comparison of experimental and simulated properties (continued)

| $n_{\text{sim}}$ | $n_{\text{iso}}$ | Set | Outlier | code | $T_m$<br>[K] | $T_b$<br>[K] | T<br>[K] | P<br>[bar] | $\rho_{\text{liq}}[\text{kg}\cdot\text{m}^{-3}]$ |       |       |         | $\Delta H_{\text{vap}}[\text{kJ}\cdot\text{mol}^{-1}]$ |      |      |         |
|------------------|------------------|-----|---------|------|--------------|--------------|----------|------------|--------------------------------------------------|-------|-------|---------|--------------------------------------------------------|------|------|---------|
|                  |                  |     |         |      |              |              |          |            | exp                                              | sim   | dev   | err [%] | exp                                                    | sim  | dev  | err [%] |
| 623              | 514              | V   | K9106b  |      | -            | 445.00       | 333.55   | 0.01       | -                                                | -     | -     | -       | 45.6                                                   | 49.0 | 3.3  | 7.2     |
| 624              | 515              | V   | K9107a  |      | 227.15       | 441.41       | 298.15   | 1.0        | 802.4                                            | 794.3 | -8.1  | -1.0    | 50.9                                                   | 50.9 | 0.0  | 0.1     |
| 625              | 516              | V   | K9108a  |      | -            | -            | 293.15   | 1.0        | 833.5                                            | 829.1 | -4.4  | -0.5    | -                                                      | -    | -    | -       |
| 626              | 517              | V   | K9109a  |      | -            | -            | 298.15   | 1.0        | 817.0                                            | 817.4 | 0.4   | 0.1     | -                                                      | -    | -    | -       |
| 627              | 518              | V   | K9110a  |      | -            | 447.15       | 287.15   | 1.0        | 829.0                                            | 812.9 | -16.1 | -1.9    | -                                                      | -    | -    | -       |
| 628              | 518              | V   | K9110b  |      | -            | 447.15       | 335.27   | 0.01       | -                                                | -     | -     | -       | 46.0                                                   | 50.5 | 4.6  | 9.9     |
| 629              | 519              | V   | K9111a  |      | -            | 456.62       | 298.15   | 1.0        | 820.0                                            | 807.3 | -12.7 | -1.6    | -                                                      | -    | -    | -       |
| 630              | 520              | V   | K9112a  |      | -            | 456.00       | 293.15   | 1.0        | 821.2                                            | 802.3 | -18.9 | -2.3    | -                                                      | -    | -    | -       |
| 631              | 520              | V   | K9112b  |      | -            | 456.00       | 342.35   | 0.01       | -                                                | -     | -     | -       | 47.4                                                   | 50.1 | 2.7  | 5.7     |
| 632              | 521              | V   | K9113a  |      | -            | -            | 293.15   | 1.0        | 824.6                                            | 821.2 | -3.4  | -0.4    | -                                                      | -    | -    | -       |
| 633              | 522              | V   | K9114a  |      | -            | 456.62       | 300.15   | 1.0        | 832.0                                            | 810.3 | -21.7 | -2.6    | -                                                      | -    | -    | -       |
| 634              | 523              | V   | K9115a  |      | -            | -            | 298.15   | 1.0        | 815.0                                            | 800.5 | -14.5 | -1.8    | -                                                      | -    | -    | -       |
| 635              | 524              | V   | K9116a  |      | -            | 451.15       | 293.15   | 1.0        | 823.9                                            | 805.9 | -18.0 | -2.2    | -                                                      | -    | -    | -       |
| 636              | 524              | V   | K9116b  |      | -            | 451.15       | 338.47   | 0.01       | -                                                | -     | -     | -       | 46.6                                                   | 51.3 | 4.7  | 10.2    |
| 637              | 525              | V   | K9120a  |      | -            | -            | 298.15   | 1.0        | 822.0                                            | 818.6 | -3.4  | -0.4    | -                                                      | -    | -    | -       |
| 638              | 526              | V   | K9121a  |      | 269.31       | 461.60       | 298.15   | 1.0        | 817.8                                            | 806.4 | -11.4 | -1.4    | 53.3                                                   | 55.9 | 2.6  | 4.9     |
| 639              | 527              | V   | K9122a  |      | -            | 460.65       | 298.15   | 1.0        | 819.7                                            | 806.6 | -13.1 | -1.6    | -                                                      | -    | -    | -       |
| 640              | 527              | V   | K9122b  |      | -            | 460.65       | 346.07   | 0.01       | -                                                | -     | -     | -       | 48.1                                                   | 52.4 | 4.3  | 8.9     |
| 641              | 528              | V   | K9123a  |      | 265.15       | 463.15       | 298.15   | 1.0        | 820.4                                            | 807.4 | -13.0 | -1.6    | 55.6                                                   | 55.9 | 0.3  | 0.6     |
| 642              | 529              | V   | K9124a  |      | 265.75       | 467.15       | 298.15   | 1.0        | 817.8                                            | 814.5 | -3.3  | -0.4    | -                                                      | -    | -    | -       |
| 643              | 529              | V   | K9124b  |      | 265.75       | 467.15       | 351.27   | 0.01       | -                                                | -     | -     | -       | 49.4                                                   | 53.7 | 4.3  | 8.7     |
| 644              | 530              | V   | K0101a  |      | -            | -            | 298.15   | 1.0        | 816.9                                            | 816.6 | -0.3  | -0.0    | 48.8                                                   | 49.1 | 0.3  | 0.6     |
| 645              | 531              | V   | K0102a  |      | -            | -            | 298.15   | 1.0        | 825.2                                            | 825.0 | -0.2  | -0.0    | -                                                      | -    | -    | -       |
| 646              | 532              | V   | K0103a  |      | -            | -            | 288.65   | 1.0        | 825.2                                            | 837.3 | 12.1  | 1.5     | -                                                      | -    | -    | -       |
| 647              | 533              | V   | K0104a  |      | -            | -            | 293.15   | 1.0        | 832.0                                            | 817.5 | -14.4 | -1.7    | -                                                      | -    | -    | -       |
| 648              | 534              | V   | K0105a  |      | -            | -            | 293.15   | 1.0        | 814.3                                            | 816.4 | 2.1   | 0.3     | -                                                      | -    | -    | -       |
| 649              | 535              | V   | K0106a  |      | -            | 473.00       | 293.15   | 1.0        | 822.6                                            | 806.0 | -16.6 | -2.0    | -                                                      | -    | -    | -       |
| 650              | 535              | V   | K0106b  |      | -            | 473.00       | 355.95   | 0.01       | -                                                | -     | -     | -       | 49.4                                                   | 53.7 | 4.2  | 8.5     |
| 651              | 536              | V   | K0107a  |      | -            | -            | 298.15   | 1.0        | 818.0                                            | 804.1 | -13.9 | -1.7    | -                                                      | -    | -    | -       |
| 652              | 537              | V   | K0108a  |      | -            | 476.65       | 293.15   | 1.0        | 821.3                                            | 809.5 | -11.8 | -1.4    | -                                                      | -    | -    | -       |
| 653              | 537              | V   | K0108b  |      | -            | 476.65       | 358.87   | 0.01       | -                                                | -     | -     | -       | 50.0                                                   | 54.3 | 4.2  | 8.4     |
| 654              | 538              | V   | K0109a  |      | -            | -            | 293.15   | 1.0        | 838.4                                            | 825.5 | -12.9 | -1.5    | -                                                      | -    | -    | -       |
| 655              | 539              | V   | K0110a  |      | -            | 477.05       | 298.15   | 1.0        | 820.5                                            | 809.3 | -11.2 | -1.4    | -                                                      | -    | -    | -       |
| 656              | 539              | V   | K0110b  |      | -            | 477.05       | 359.19   | 0.01       | -                                                | -     | -     | -       | 50.1                                                   | 55.9 | 5.8  | 11.6    |
| 657              | 540              | V   | K0111a  |      | 264.15       | 479.65       | 293.65   | 1.0        | 822.0                                            | 812.7 | -9.3  | -1.1    | -                                                      | -    | -    | -       |
| 658              | 540              | V   | K0111b  |      | 264.15       | 479.65       | 361.27   | 0.01       | -                                                | -     | -     | -       | 50.5                                                   | 55.8 | 5.2  | 10.3    |
| 659              | 541              | V   | K0112a  |      | 275.15       | 476.15       | 298.15   | 1.0        | 821.9                                            | 810.6 | -11.3 | -1.4    | -                                                      | -    | -    | -       |
| 660              | 541              | V   | K0112b  |      | 275.15       | 476.15       | 358.47   | 0.01       | -                                                | -     | -     | -       | 50.3                                                   | 56.0 | 5.8  | 11.5    |
| 661              | 542              | V   | K0113a  |      | 287.15       | 483.35       | 298.15   | 1.0        | 820.1                                            | 817.1 | -3.0  | -0.4    | 60.9                                                   | 62.5 | 1.6  | 2.6     |
| 662              | 543              | V   | K7201a  |      | -            | 446.15       | 333.97   | 0.01       | 923.3                                            | 928.2 | 5.0   | 0.5     | -                                                      | -    | -    | -       |
| 663              | 544              | V   | K7202a  |      | -            | 411.15       | 295.15   | 1.0        | 908.0                                            | 933.4 | 25.4  | 2.8     | -                                                      | -    | -    | -       |
| 664              | 545              | V   | K7203a  |      | -            | 451.65       | 292.15   | 1.0        | 953.1                                            | 947.6 | -5.5  | -0.6    | -                                                      | -    | -    | -       |
| 665              | 546              | V   | K7204a  |      | -            | 469.15       | 352.37   | 0.01       | 902.9                                            | 891.7 | -11.1 | -1.2    | -                                                      | -    | -    | -       |
| 666              | 547              | V   | K7205a  |      | -            | 417.15       | 291.15   | 1.0        | 919.0                                            | 944.1 | 25.1  | 2.7     | -                                                      | -    | -    | -       |
| 667              | 548              | V   | K7206a  |      | -            | 449.15       | 293.15   | 1.0        | 945.0                                            | 924.7 | -20.3 | -2.1    | -                                                      | -    | -    | -       |
| 668              | 549              | V   | K7207a  | ×    | -            | 447.20       | 447.2    | 1.0        | -                                                | -     | -     | -       | 38.8                                                   | 47.9 | 9.1  | 23.4    |
| 669              | 550              | V   | K7208a  |      | -            | 495.15       | 373.17   | 0.01       | 885.3                                            | 885.7 | 0.4   | 0.0     | -                                                      | -    | -    | -       |
| 670              | 551              | V   | K8202a  | ×    | -            | 417.65       | 311.17   | 0.01       | 909.0                                            | 883.9 | -25.2 | -2.8    | 41.8                                                   | 56.1 | 14.2 | 34.1    |

Table S.7 – Comparison of experimental and simulated properties (continued)

| $n_{\text{sim}}$ | $n_{\text{iso}}$ | Set | Outlier | code | $T_m$<br>[K] | $T_b$<br>[K] | T<br>[K] | P<br>[bar] | $\rho_{\text{liq}}[\text{kg}\cdot\text{m}^{-3}]$ |        |       |         | $\Delta H_{\text{vap}}[\text{kJ}\cdot\text{mol}^{-1}]$ |      |      |         |
|------------------|------------------|-----|---------|------|--------------|--------------|----------|------------|--------------------------------------------------|--------|-------|---------|--------------------------------------------------------|------|------|---------|
|                  |                  |     |         |      |              |              |          |            | exp                                              | sim    | dev   | err [%] | exp                                                    | sim  | dev  | err [%] |
| 671              | 552              | V   | K8206a  | ×    | -            | 441.15       | 329.97   | 0.01       | 907.8                                            | 888.9  | -18.9 | -2.1    | 45.3                                                   | 62.5 | 17.2 | 37.9    |
| 672              | 553              | V   | K8207a  |      | -            | 467.15       | 350.77   | 0.01       | 882.2                                            | 875.7  | -6.5  | -0.7    | -                                                      | -    | -    | -       |
| 673              | 554              | V   | K9201a  |      | -            | 339.15       | 298.0    | 1.0        | -                                                | -      | -     | -       | 56.1                                                   | 59.7 | 3.6  | 6.4     |
| 674              | 555              | V   | K9202a  |      | -            | 467.93       | 351.39   | 0.01       | 893.7                                            | 867.9  | -25.8 | -2.9    | -                                                      | -    | -    | -       |
| 675              | 556              | V   | K0201a  |      | -            | 442.15       | 442.15   | 1.0        | -                                                | -      | -     | -       | 38.4                                                   | 45.5 | 7.1  | 18.5    |
| 676              | 557              | V   | K0202a  |      | -            | -            | 298.0    | 1.0        | -                                                | -      | -     | -       | 57.7                                                   | 61.7 | 4.0  | 7.0     |
| 677              | 558              | V   | K7301a  | ×    | -            | 476.65       | 384.0    | 1.0        | -                                                | -      | -     | -       | 54.9                                                   | 75.1 | 20.2 | 36.8    |
| 678              | 559              | V   | K7302a  |      | 322.15       | 455.78       | 313.15   | 1.0        | 1059.9                                           | 1050.3 | -9.6  | -0.9    | -                                                      | -    | -    | -       |
| 679              | 559              | V   | K7302b  | ×    | 322.15       | 455.78       | 455.78   | 1.0        | -                                                | -      | -     | -       | 39.6                                                   | 59.9 | 20.2 | 51.0    |
| 680              | 560              | V   | E7201a  |      | 183.65       | 391.55       | 298.15   | 1.0        | 849.5                                            | 833.5  | -15.9 | -1.9    | 41.3                                                   | 40.5 | -0.8 | -1.9    |
| 681              | 561              | V   | E7202a  |      | -            | -            | 293.15   | 1.0        | 870.0                                            | 869.4  | -0.6  | -0.1    | 43.9                                                   | 44.0 | 0.1  | 0.3     |
| 682              | 562              | V   | E7203a  |      | -            | -            | 298.15   | 1.0        | 853.9                                            | 852.5  | -1.4  | -0.2    | -                                                      | -    | -    | -       |
| 683              | 562              | V   | E7203b  |      | -            | -            | 300.07   | 0.01       | -                                                | -      | -     | -       | 43.5                                                   | 43.1 | -0.3 | -0.8    |
| 684              | 563              | V   | E7204a  |      | -            | -            | 297.85   | 1.0        | 872.5                                            | 857.4  | -15.1 | -1.7    | 40.3                                                   | 42.9 | 2.5  | 6.3     |
| 685              | 564              | V   | E7205a  |      | -            | 414.55       | 293.15   | 1.0        | 864.7                                            | 835.6  | -29.1 | -3.4    | -                                                      | -    | -    | -       |
| 686              | 564              | V   | E7205b  |      | -            | 414.55       | 414.55   | 1.0        | -                                                | -      | -     | -       | 41.1                                                   | 34.1 | -6.9 | -16.9   |
| 687              | 565              | V   | E7206a  |      | -            | 396.15       | 294.5    | 1.0        | 846.7                                            | 814.4  | -32.3 | -3.8    | -                                                      | -    | -    | -       |
| 688              | 565              | V   | E7206b  |      | -            | 396.15       | 272.0    | 1.0        | -                                                | -      | -     | -       | 43.3                                                   | 43.1 | -0.2 | -0.4    |
| 689              | 566              | V   | E7207a  |      | -            | 401.65       | 298.15   | 1.0        | 866.0                                            | 850.4  | -15.6 | -1.8    | -                                                      | -    | -    | -       |
| 690              | 567              | V   | E7208a  |      | -            | 409.15       | 293.15   | 1.0        | 879.7                                            | 865.2  | -14.5 | -1.6    | -                                                      | -    | -    | -       |
| 691              | 568              | V   | E7209a  |      | -            | -            | 293.15   | 1.0        | 876.5                                            | 861.1  | -15.4 | -1.8    | -                                                      | -    | -    | -       |
| 692              | 569              | V   | E7210a  |      | -            | -            | 293.15   | 1.0        | 867.8                                            | 841.1  | -26.7 | -3.1    | 44.7                                                   | 44.4 | -0.3 | -0.8    |
| 693              | 570              | V   | E7211a  |      | -            | 407.15       | 298.15   | 1.0        | 859.5                                            | 824.8  | -34.7 | -4.0    | -                                                      | -    | -    | -       |
| 694              | 570              | V   | E7211b  |      | -            | 407.15       | 282.0    | 1.0        | -                                                | -      | -     | -       | 50.5                                                   | 44.7 | -5.8 | -11.4   |
| 695              | 571              | V   | E7212a  |      | 173.85       | 408.15       | 298.15   | 1.0        | 861.2                                            | 836.9  | -24.3 | -2.8    | -                                                      | -    | -    | -       |
| 696              | 571              | V   | E7212b  |      | 173.85       | 408.15       | 282.0    | 1.0        | -                                                | -      | -     | -       | 44.5                                                   | 45.6 | 1.1  | 2.6     |
| 697              | 572              | V   | E7213a  |      | 201.75       | 409.15       | 298.15   | 1.0        | 867.5                                            | 830.8  | -36.7 | -4.2    | -                                                      | -    | -    | -       |
| 698              | 572              | V   | E7213b  |      | 201.75       | 409.15       | 286.0    | 1.0        | -                                                | -      | -     | -       | 44.9                                                   | 45.1 | 0.2  | 0.5     |
| 699              | 573              | V   | E7214a  |      | -            | 406.15       | 298.15   | 1.0        | 861.2                                            | 834.6  | -26.6 | -3.1    | -                                                      | -    | -    | -       |
| 700              | 574              | V   | E7215a  |      | -            | 402.15       | 298.15   | 1.0        | 853.9                                            | 827.9  | -26.1 | -3.0    | -                                                      | -    | -    | -       |
| 701              | 575              | V   | E7216a  |      | -            | 413.15       | 293.15   | 1.0        | 867.8                                            | 859.4  | -8.4  | -1.0    | -                                                      | -    | -    | -       |
| 702              | 575              | V   | E7216b  |      | -            | 413.15       | 309.67   | 0.01       | -                                                | -      | -     | -       | 42.9                                                   | 45.8 | 2.9  | 6.7     |
| 703              | 576              | V   | E7217a  |      | -            | 405.15       | 303.27   | 0.01       | 861.5                                            | 849.1  | -12.4 | -1.4    | 41.8                                                   | 45.1 | 3.3  | 7.8     |
| 704              | 577              | V   | E7218a  |      | 194.65       | 414.75       | 298.75   | 1.0        | 864.8                                            | 851.9  | -12.9 | -1.5    | 46.4                                                   | 47.1 | 0.7  | 1.4     |
| 705              | 578              | V   | E7219a  |      | -            | 406.15       | 298.15   | 1.0        | 863.1                                            | 849.5  | -13.5 | -1.6    | -                                                      | -    | -    | -       |
| 706              | 578              | V   | E7219b  |      | -            | 406.15       | 304.07   | 0.01       | -                                                | -      | -     | -       | 42.0                                                   | 45.6 | 3.6  | 8.6     |
| 707              | 579              | V   | E7220a  |      | 203.15       | 422.65       | 298.15   | 1.0        | 880.4                                            | 864.3  | -16.1 | -1.8    | 47.7                                                   | 49.6 | 1.9  | 4.0     |
| 708              | 580              | V   | E7221a  |      | 181.95       | 419.25       | 298.15   | 1.01       | 869.4                                            | 846.8  | -22.7 | -2.6    | 47.0                                                   | 47.3 | 0.3  | 0.7     |
| 709              | 581              | V   | E7222a  |      | 177.95       | 416.45       | 298.15   | 1.0        | 868.2                                            | 841.9  | -26.3 | -3.0    | -                                                      | -    | -    | -       |
| 710              | 581              | V   | E7222b  |      | 177.95       | 416.45       | 286.0    | 1.0        | -                                                | -      | -     | -       | 44.3                                                   | 47.4 | 3.1  | 7.1     |
| 711              | 582              | V   | E7223a  |      | 183.65       | 419.75       | 298.15   | 1.0        | 871.5                                            | 844.5  | -27.1 | -3.1    | 48.5                                                   | 46.9 | -1.6 | -3.4    |
| 712              | 583              | V   | E7224a  |      | 202.25       | 422.15       | 298.15   | 1.0        | 872.2                                            | 857.7  | -14.5 | -1.7    | 48.6                                                   | 48.8 | 0.2  | 0.5     |
| 713              | 584              | V   | E8201a  |      | -            | -            | 293.15   | 1.0        | 830.0                                            | 822.4  | -7.6  | -0.9    | -                                                      | -    | -    | -       |
| 714              | 585              | V   | E8202a  |      | -            | -            | 298.15   | 1.0        | 874.9                                            | 878.9  | 4.0   | 0.5     | -                                                      | -    | -    | -       |
| 715              | 586              | V   | E8203a  |      | -            | 399.85       | 399.85   | 1.0        | -                                                | -      | -     | -       | 30.5                                                   | 36.6 | 6.1  | 20.0    |
| 716              | 587              | V   | E8204a  |      | -            | -            | 277.15   | 1.0        | 883.0                                            | 867.2  | -15.8 | -1.8    | -                                                      | -    | -    | -       |
| 717              | 588              | V   | E8205a  |      | -            | 421.15       | 316.07   | 0.01       | 860.1                                            | 853.6  | -6.6  | -0.8    | -                                                      | -    | -    | -       |
| 718              | 589              | V   | E8206a  |      | -            | -            | 293.15   | 1.0        | 860.4                                            | 849.3  | -11.1 | -1.3    | -                                                      | -    | -    | -       |

Table S.7 – Comparison of experimental and simulated properties (continued)

| $n_{\text{sim}}$ | $n_{\text{iso}}$ | Set | Outlier | code | $T_m$<br>[K] | $T_b$<br>[K] | T<br>[K] | P<br>[bar] | $\rho_{\text{liq}}[\text{kg}\cdot\text{m}^{-3}]$ |       |       |         | $\Delta H_{\text{vap}}[\text{kJ}\cdot\text{mol}^{-1}]$ |      |      |         |
|------------------|------------------|-----|---------|------|--------------|--------------|----------|------------|--------------------------------------------------|-------|-------|---------|--------------------------------------------------------|------|------|---------|
|                  |                  |     |         |      |              |              |          |            | exp                                              | sim   | dev   | err [%] | exp                                                    | sim  | dev  | err [%] |
| 719              | 590              | V   | E8208a  |      | -            | -            | 293.15   | 1.0        | 867.9                                            | 869.1 | 1.2   | 0.1     | -                                                      | -    | -    | -       |
| 720              | 591              | V   | E8209b  |      | -            | 437.43       | 298.0    | 1.0        | -                                                | -     | -     | -       | 45.7                                                   | 45.7 | -0.0 | -0.1    |
| 721              | 592              | V   | E8210b  |      | -            | 426.15       | 298.0    | 1.0        | -                                                | -     | -     | -       | 45.6                                                   | 47.7 | 2.1  | 4.6     |
| 722              | 593              | V   | E8211a  |      | -            | 409.15       | 409.15   | 1.0        | -                                                | -     | -     | -       | 36.4                                                   | 38.4 | 2.0  | 5.6     |
| 723              | 594              | V   | E8212a  |      | -            | -            | 298.15   | 1.0        | 866.0                                            | 840.6 | -25.4 | -2.9    | -                                                      | -    | -    | -       |
| 724              | 595              | V   | E8213a  |      | 192.55       | 421.15       | 293.15   | 1.0        | 847.0                                            | 817.6 | -29.4 | -3.5    | 48.5                                                   | 46.1 | -2.4 | -4.9    |
| 725              | 596              | V   | E8214a  |      | -            | -            | 289.15   | 1.0        | 870.0                                            | 825.6 | -44.4 | -5.1    | -                                                      | -    | -    | -       |
| 726              | 597              | V   | E8216a  |      | -            | 420.15       | 298.15   | 1.0        | 846.1                                            | 820.0 | -26.1 | -3.1    | -                                                      | -    | -    | -       |
| 727              | 598              | V   | E8217a  |      | -            | 422.15       | 316.87   | 0.01       | 846.6                                            | 839.0 | -7.7  | -0.9    | -                                                      | -    | -    | -       |
| 728              | 599              | V   | E8218a  |      | -            | 420.65       | 298.15   | 1.0        | 880.5                                            | 848.3 | -32.2 | -3.7    | -                                                      | -    | -    | -       |
| 729              | 600              | V   | E8219a  |      | -            | -            | 293.15   | 1.0        | 875.0                                            | 864.6 | -10.4 | -1.2    | -                                                      | -    | -    | -       |
| 730              | 601              | V   | E8220a  |      | -            | -            | 293.15   | 1.0        | 863.3                                            | 846.9 | -16.4 | -1.9    | -                                                      | -    | -    | -       |
| 731              | 602              | V   | E8221a  |      | -            | 428.3        | 293.15   | 1.0        | 876.5                                            | 843.0 | -33.5 | -3.8    | 48.4                                                   | 49.1 | 0.8  | 1.6     |
| 732              | 602              | V   | E8221b  |      | -            | 428.3        | 298.15   | 1.0        | -                                                | -     | -     | -       | 48.4                                                   | 48.8 | 0.4  | 0.8     |
| 733              | 603              | V   | E8222a  |      | -            | -            | 293.15   | 1.0        | 869.7                                            | 836.7 | -33.0 | -3.8    | -                                                      | -    | -    | -       |
| 734              | 604              | V   | E8223a  |      | -            | -            | 298.15   | 1.0        | 857.4                                            | 826.4 | -31.0 | -3.6    | -                                                      | -    | -    | -       |
| 735              | 605              | V   | E8224a  |      | -            | -            | 293.15   | 1.0        | 878.0                                            | 850.3 | -27.7 | -3.1    | -                                                      | -    | -    | -       |
| 736              | 606              | V   | E8225a  |      | -            | 429.05       | 298.15   | 1.0        | 857.5                                            | 832.9 | -24.6 | -2.9    | 44.3                                                   | 48.6 | 4.3  | 9.7     |
| 737              | 607              | V   | E8227a  |      | -            | 436.15       | 293.15   | 1.0        | 870.5                                            | 846.6 | -23.9 | -2.7    | -                                                      | -    | -    | -       |
| 738              | 607              | V   | E8227b  |      | -            | 436.15       | 299.0    | 1.0        | -                                                | -     | -     | -       | 45.4                                                   | 50.6 | 5.2  | 11.4    |
| 739              | 608              | V   | E8228a  |      | -            | 430.15       | 298.15   | 1.0        | 860.6                                            | 829.8 | -30.8 | -3.6    | -                                                      | -    | -    | -       |
| 740              | 608              | V   | E8228b  |      | -            | 430.15       | 292.0    | 1.0        | -                                                | -     | -     | -       | 41.7                                                   | 49.2 | 7.5  | 18.0    |
| 741              | 609              | V   | E8229a  |      | -            | 446.15       | 298.15   | 1.0        | 865.0                                            | 839.3 | -25.7 | -3.0    | 44.1                                                   | 50.0 | 5.8  | 13.3    |
| 742              | 610              | V   | E8230a  |      | -            | -            | 298.15   | 1.0        | 863.2                                            | 833.4 | -29.8 | -3.5    | -                                                      | -    | -    | -       |
| 743              | 611              | V   | E8231a  |      | -            | 440.22       | 298.15   | 1.0        | 861.3                                            | 836.9 | -24.4 | -2.8    | -                                                      | -    | -    | -       |
| 744              | 612              | V   | E8232a  |      | -            | 436.35       | 293.15   | 1.0        | 857.9                                            | 833.8 | -24.1 | -2.8    | -                                                      | -    | -    | -       |
| 745              | 613              | V   | E8233a  |      | -            | 435.65       | 293.15   | 1.0        | 879.0                                            | 866.8 | -12.2 | -1.4    | -                                                      | -    | -    | -       |
| 746              | 613              | V   | E8233b  |      | -            | 435.65       | 327.67   | 0.01       | -                                                | -     | -     | -       | 44.9                                                   | 49.2 | 4.3  | 9.6     |
| 747              | 614              | V   | E8235a  |      | -            | 436.15       | 298.15   | 1.0        | 869.1                                            | 855.2 | -13.9 | -1.6    | -                                                      | -    | -    | -       |
| 748              | 614              | V   | E8235b  |      | -            | 436.15       | 328.07   | 0.01       | -                                                | -     | -     | -       | 45.7                                                   | 49.2 | 3.5  | 7.7     |
| 749              | 615              | V   | E8236a  |      | -            | -            | 298.15   | 1.0        | 859.9                                            | 849.1 | -10.8 | -1.3    | -                                                      | -    | -    | -       |
| 750              | 616              | V   | E8237a  |      | 217.45       | 447.15       | 298.15   | 1.01       | 875.9                                            | 862.0 | -13.9 | -1.6    | 51.6                                                   | 54.4 | 2.8  | 5.4     |
| 751              | 617              | V   | E8238a  |      | 205.55       | 440.15       | 298.15   | 1.0        | 866.7                                            | 847.2 | -19.5 | -2.2    | 50.6                                                   | 52.2 | 1.6  | 3.1     |
| 752              | 618              | V   | E8239a  |      | 202.45       | 440.65       | 298.15   | 1.0        | 865.8                                            | 842.2 | -23.5 | -2.7    | -                                                      | -    | -    | -       |
| 753              | 618              | V   | E8239b  |      | 202.45       | 440.65       | 329.57   | 0.01       | -                                                | -     | -     | -       | 46.6                                                   | 49.1 | 2.5  | 5.3     |
| 754              | 619              | V   | E8240a  |      | 181.65       | 438.15       | 298.15   | 1.01       | 869.1                                            | 841.8 | -27.3 | -3.1    | -                                                      | -    | -    | -       |
| 755              | 619              | V   | E8240b  |      | 181.65       | 438.15       | 327.57   | 0.01       | -                                                | -     | -     | -       | 46.4                                                   | 49.2 | 2.8  | 6.0     |
| 756              | 620              | V   | E8241a  |      | 200.05       | 441.90       | 298.15   | 1.0        | 868.1                                            | 844.8 | -23.4 | -2.7    | 52.2                                                   | 51.7 | -0.5 | -1.0    |
| 757              | 621              | V   | E8242a  |      | 212.15       | 444.65       | 298.15   | 1.0        | 868.6                                            | 856.3 | -12.3 | -1.4    | 51.9                                                   | 53.6 | 1.7  | 3.3     |
| 758              | 622              | V   | E9201a  |      | -            | -            | 298.0    | 1.0        | -                                                | -     | -     | -       | 48.4                                                   | 50.7 | 2.3  | 4.8     |
| 759              | 623              | V   | E9202a  |      | -            | -            | 298.0    | 1.0        | -                                                | -     | -     | -       | 47.8                                                   | 47.3 | -0.5 | -1.0    |
| 760              | 624              | V   | E9203a  |      | -            | -            | 298.0    | 1.0        | -                                                | -     | -     | -       | 50.4                                                   | 49.1 | -1.3 | -2.5    |
| 761              | 625              | V   | E9205b  |      | -            | 460.31       | 298.0    | 1.0        | -                                                | -     | -     | -       | 50.3                                                   | 50.1 | -0.1 | -0.3    |
| 762              | 626              | V   | E9207a  |      | -            | -            | 301.15   | 1.0        | 855.0                                            | 837.0 | -18.0 | -2.1    | -                                                      | -    | -    | -       |
| 763              | 627              | V   | E9209a  |      | -            | 442.15       | 293.15   | 1.0        | 862.7                                            | 828.5 | -34.1 | -4.0    | 51.7                                                   | 51.9 | 0.2  | 0.4     |
| 764              | 628              | V   | E9210a  |      | -            | -            | 298.15   | 1.0        | 869.0                                            | 851.8 | -17.2 | -2.0    | -                                                      | -    | -    | -       |
| 765              | 629              | V   | E9212a  |      | -            | 442.15       | 298.15   | 1.0        | 861.7                                            | 822.5 | -39.2 | -4.6    | -                                                      | -    | -    | -       |
| 766              | 629              | V   | E9212b  |      | -            | 442.15       | 304.0    | 1.0        | -                                                | -     | -     | -       | 47.3                                                   | 50.3 | 3.0  | 6.3     |

Table S.7 – Comparison of experimental and simulated properties (continued)

| $n_{\text{sim}}$ | $n_{\text{iso}}$ | Set | Outlier | code   | $T_m$<br>[K] | $T_b$<br>[K] | T<br>[K] | P<br>[bar] | $\rho_{\text{liq}}[\text{kg}\cdot\text{m}^{-3}]$ |       |       |         | $\Delta H_{\text{vap}}[\text{kJ}\cdot\text{mol}^{-1}]$ |      |      |         |
|------------------|------------------|-----|---------|--------|--------------|--------------|----------|------------|--------------------------------------------------|-------|-------|---------|--------------------------------------------------------|------|------|---------|
|                  |                  |     |         |        |              |              |          |            | exp                                              | sim   | dev   | err [%] | exp                                                    | sim  | dev  | err [%] |
| 767              | 630              | V   | E9213a  | -      | -            | -            | 293.15   | 1.0        | 848.2                                            | 830.2 | -18.0 | -2.1    | -                                                      | -    | -    | -       |
| 768              | 631              | V   | E9214a  | -      | -            | -            | 293.15   | 1.0        | 871.0                                            | 862.9 | -8.1  | -0.9    | -                                                      | -    | -    | -       |
| 769              | 632              | V   | E9215a  | -      | -            | -            | 293.15   | 1.0        | 857.2                                            | 847.1 | -10.1 | -1.2    | -                                                      | -    | -    | -       |
| 770              | 633              | V   | E9216a  | -      | -            | -            | 293.15   | 1.0        | 868.8                                            | 841.5 | -27.3 | -3.1    | -                                                      | -    | -    | -       |
| 771              | 634              | V   | E9217a  | -      | -            | -            | 293.15   | 1.0        | 866.9                                            | 838.5 | -28.4 | -3.3    | -                                                      | -    | -    | -       |
| 772              | 635              | V   | E9218a  | -      | 452.15       | -            | 293.15   | 1.0        | 862.0                                            | 837.2 | -24.8 | -2.9    | 50.6                                                   | 53.1 | 2.5  | 4.9     |
| 773              | 636              | V   | E9219a  | -      | -            | -            | 293.15   | 1.0        | 872.1                                            | 833.0 | -39.1 | -4.5    | -                                                      | -    | -    | -       |
| 774              | 637              | V   | E9220a  | -      | 450.15       | -            | 293.15   | 1.0        | 867.9                                            | 850.7 | -17.2 | -2.0    | -                                                      | -    | -    | -       |
| 775              | 638              | V   | E9221a  | -      | 456.91       | -            | 298.15   | 1.0        | 856.7                                            | 833.6 | -23.1 | -2.7    | -                                                      | -    | -    | -       |
| 776              | 638              | V   | E9221b  | -      | 456.91       | 456.91       | 1.0      | 1.0        | -                                                | -     | -     | -       | 39.8                                                   | 42.1 | 2.3  | 5.8     |
| 777              | 639              | V   | E9222a  | -      | 453.15       | -            | 293.15   | 1.0        | 870.8                                            | 854.6 | -16.2 | -1.9    | -                                                      | -    | -    | -       |
| 778              | 640              | V   | E9223a  | -      | 452.15       | -            | 336.57   | 0.01       | -                                                | -     | -     | -       | 49.2                                                   | 50.8 | 1.6  | 3.3     |
| 779              | 641              | V   | E9225a  | -      | 452.15       | -            | 298.15   | 1.0        | 860.3                                            | 837.9 | -22.4 | -2.6    | -                                                      | -    | -    | -       |
| 780              | 641              | V   | E9225b  | -      | 452.15       | -            | 309.0    | 1.0        | -                                                | -     | -     | -       | 47.4                                                   | 53.6 | 6.2  | 13.1    |
| 781              | 642              | V   | E9226a  | -      | 456.15       | -            | 298.15   | 1.0        | 853.6                                            | 831.4 | -22.1 | -2.6    | -                                                      | -    | -    | -       |
| 782              | 642              | V   | E9226b  | -      | 456.15       | -            | 338.77   | 0.01       | -                                                | -     | -     | -       | 48.8                                                   | 50.5 | 1.7  | 3.6     |
| 783              | 643              | V   | E9227a  | -      | 455.15       | -            | 298.15   | 1.0        | 864.7                                            | 835.0 | -29.7 | -3.4    | -                                                      | -    | -    | -       |
| 784              | 644              | V   | E9228a  | -      | -            | -            | 298.15   | 1.0        | 854.9                                            | 834.5 | -20.4 | -2.4    | -                                                      | -    | -    | -       |
| 785              | 645              | V   | E9229a  | -      | -            | -            | 298.15   | 1.0        | 852.5                                            | 831.0 | -21.5 | -2.5    | -                                                      | -    | -    | -       |
| 786              | 645              | V   | E9229b  | -      | -            | -            | 322.0    | 1.0        | -                                                | -     | -     | -       | 51.6                                                   | 52.0 | 0.4  | 0.7     |
| 787              | 646              | V   | E9232a  | -      | -            | -            | 346.57   | 0.01       | 818.2                                            | 811.4 | -6.8  | -0.8    | -                                                      | -    | -    | -       |
| 788              | 647              | V   | E9234a  | -      | -            | -            | 298.15   | 1.0        | 857.0                                            | 847.6 | -9.5  | -1.1    | -                                                      | -    | -    | -       |
| 789              | 648              | V   | E9235a  | 236.25 | 466.05       | -            | 298.15   | 1.0        | 873.1                                            | 859.8 | -13.3 | -1.5    | 56.4                                                   | 59.1 | 2.7  | 4.8     |
| 790              | 649              | V   | E9236a  | 206.95 | 460.15       | -            | 298.15   | 1.0        | 864.7                                            | 846.1 | -18.6 | -2.1    | -                                                      | -    | -    | -       |
| 791              | 650              | V   | E9237a  | 199.15 | 460.15       | -            | 298.15   | 1.0        | 863.0                                            | 842.2 | -20.8 | -2.4    | -                                                      | -    | -    | -       |
| 792              | 650              | V   | E9237b  | 199.15 | 460.15       | -            | 330.0    | 1.0        | -                                                | -     | -     | -       | 52.1                                                   | 53.7 | 1.6  | 3.0     |
| 793              | 651              | V   | E9238a  | 189.38 | 459.15       | -            | 298.15   | 1.0        | 863.4                                            | 842.1 | -21.2 | -2.5    | -                                                      | -    | -    | -       |
| 794              | 651              | V   | E9238b  | 189.38 | 459.15       | -            | 344.77   | 0.01       | -                                                | -     | -     | -       | 49.2                                                   | 52.6 | 3.4  | 6.9     |
| 795              | 652              | V   | E9239a  | 200.49 | 458.15       | -            | 298.15   | 1.0        | 861.9                                            | 842.2 | -19.7 | -2.3    | 53.6                                                   | 56.2 | 2.6  | 4.8     |
| 796              | 653              | V   | E9240a  | 215.65 | 463.15       | -            | 298.15   | 1.0        | 865.4                                            | 844.1 | -21.4 | -2.5    | 57.1                                                   | 56.4 | -0.7 | -1.3    |
| 797              | 654              | V   | E9241a  | 222.85 | 465.55       | -            | 298.15   | 1.0        | 866.4                                            | 854.5 | -11.9 | -1.4    | 56.9                                                   | 58.4 | 1.5  | 2.6     |
| 798              | 655              | V   | E0201a  | -      | -            | -            | 293.15   | 1.0        | 843.1                                            | 829.1 | -13.9 | -1.6    | 48.9                                                   | 48.5 | -0.4 | -0.9    |
| 799              | 656              | V   | E0202a  | -      | -            | -            | 298.0    | 1.0        | -                                                | -     | -     | -       | 48.0                                                   | 48.6 | 0.6  | 1.3     |
| 800              | 657              | V   | E0203a  | -      | 461.15       | -            | 273.15   | 1.0        | 872.9                                            | 853.9 | -19.0 | -2.2    | -                                                      | -    | -    | -       |
| 801              | 658              | V   | E0204a  | -      | -            | -            | 289.15   | 1.0        | 883.7                                            | 877.8 | -5.9  | -0.7    | -                                                      | -    | -    | -       |
| 802              | 659              | V   | E0205a  | -      | -            | -            | 293.15   | 1.0        | 856.8                                            | 845.1 | -11.7 | -1.4    | -                                                      | -    | -    | -       |
| 803              | 660              | V   | E0209a  | -      | 463.15       | -            | 298.15   | 1.0        | 854.1                                            | 831.0 | -23.1 | -2.7    | -                                                      | -    | -    | -       |
| 804              | 660              | V   | E0209b  | -      | 463.15       | -            | 315.0    | 1.0        | -                                                | -     | -     | -       | 47.2                                                   | 55.2 | 8.0  | 16.9    |
| 805              | 661              | V   | E0210a  | -      | 445.15       | -            | 333.17   | 0.01       | 819.4                                            | 800.1 | -19.3 | -2.4    | -                                                      | -    | -    | -       |
| 806              | 662              | V   | E0212a  | -      | 457.65       | -            | 345.27   | 0.01       | 810.3                                            | 808.2 | -2.1  | -0.3    | -                                                      | -    | -    | -       |
| 807              | 663              | V   | E0213a  | -      | 460.15       | -            | 293.15   | 1.0        | 847.4                                            | 846.2 | -1.2  | -0.1    | -                                                      | -    | -    | -       |
| 808              | 664              | V   | E0214a  | -      | -            | -            | 293.15   | 1.0        | 865.9                                            | 847.9 | -18.0 | -2.1    | -                                                      | -    | -    | -       |
| 809              | 665              | V   | E0215a  | -      | -            | -            | 298.15   | 1.0        | 864.4                                            | 855.8 | -8.6  | -1.0    | -                                                      | -    | -    | -       |
| 810              | 666              | V   | E0216a  | -      | 473.73       | -            | 298.15   | 1.0        | 858.6                                            | 842.6 | -16.0 | -1.9    | -                                                      | -    | -    | -       |
| 811              | 667              | V   | E0217a  | -      | -            | -            | 277.15   | 1.0        | 875.9                                            | 868.3 | -7.6  | -0.9    | -                                                      | -    | -    | -       |
| 812              | 668              | V   | E0218a  | -      | -            | -            | 293.15   | 1.0        | 870.0                                            | 833.3 | -36.7 | -4.2    | -                                                      | -    | -    | -       |
| 813              | 669              | V   | E0219a  | -      | -            | -            | 292.95   | 1.0        | 872.6                                            | 850.5 | -22.1 | -2.5    | -                                                      | -    | -    | -       |
| 814              | 670              | V   | E0220a  | -      | -            | -            | 354.97   | 0.01       | 826.1                                            | 799.5 | -26.6 | -3.2    | 51.3                                                   | 55.0 | 3.6  | 7.1     |

Table S.7 – Comparison of experimental and simulated properties (continued)

| $n_{\text{sim}}$ | $n_{\text{iso}}$ | Set | Outlier | code | $T_m$<br>[K] | $T_b$<br>[K] | $T$<br>[K] | $P$<br>[bar] | $\rho_{\text{liq}}[\text{kg}\cdot\text{m}^{-3}]$ |        |       |         | $\Delta H_{\text{vap}}[\text{kJ}\cdot\text{mol}^{-1}]$ |      |       |         |
|------------------|------------------|-----|---------|------|--------------|--------------|------------|--------------|--------------------------------------------------|--------|-------|---------|--------------------------------------------------------|------|-------|---------|
|                  |                  |     |         |      |              |              |            |              | exp                                              | sim    | dev   | err [%] | exp                                                    | sim  | dev   | err [%] |
| 815              | 671              | V   | E0222a  |      | -            | 466.15       | 293.15     | 1.0          | 858.0                                            | 842.1  | -15.8 | -1.9    | -                                                      | -    | -     | -       |
| 816              | 672              | V   | E0223a  |      | -            | 427.05       | 318.69     | 0.01         | -                                                | -      | -     | -       | 53.0                                                   | 56.8 | 3.7   | 7.0     |
| 817              | 673              | V   | E0224a  |      | -            | -            | 298.15     | 1.0          | 857.5                                            | 835.1  | -22.4 | -2.6    | -                                                      | -    | -     | -       |
| 818              | 674              | V   | E0225a  |      | 193.15       | 471.75       | 298.15     | 1.0          | 868.8                                            | 859.2  | -9.6  | -1.1    | -                                                      | -    | -     | -       |
| 819              | 674              | V   | E0225b  |      | 193.15       | 471.75       | 348.0      | 1.0          | -                                                | -      | -     | -       | 50.1                                                   | 56.6 | 6.5   | 13.0    |
| 820              | 675              | V   | E0227a  |      | -            | -            | 353.67     | 0.01         | 805.4                                            | 807.9  | 2.5   | 0.3     | -                                                      | -    | -     | -       |
| 821              | 676              | V   | E0228a  |      | -            | -            | 348.17     | 0.01         | 814.2                                            | 810.3  | -3.9  | -0.5    | -                                                      | -    | -     | -       |
| 822              | 677              | V   | E0230a  |      | -            | -            | 298.15     | 1.0          | 858.1                                            | 847.3  | -10.8 | -1.2    | -                                                      | -    | -     | -       |
| 823              | 678              | V   | E0231a  |      | -            | 486.65       | 298.15     | 1.0          | 870.9                                            | 858.3  | -12.6 | -1.4    | 61.6                                                   | 64.0 | 2.4   | 3.8     |
| 824              | 679              | V   | E0232a  |      | 228.45       | 481.65       | 298.15     | 1.0          | 862.9                                            | 845.8  | -17.1 | -2.0    | 59.5                                                   | 61.7 | 2.2   | 3.7     |
| 825              | 680              | V   | E0233a  |      | -            | 481.15       | 298.15     | 1.0          | 861.6                                            | 842.3  | -19.3 | -2.2    | -                                                      | -    | -     | -       |
| 826              | 680              | V   | E0233b  |      | -            | 481.15       | 361.97     | 0.01         | -                                                | -      | -     | -       | 52.1                                                   | 55.8 | 3.6   | 7.0     |
| 827              | 681              | V   | E0234a  |      | 223.15       | 481.15       | 298.15     | 1.0          | 862.3                                            | 841.9  | -20.4 | -2.4    | -                                                      | -    | -     | -       |
| 828              | 681              | V   | E0234b  |      | 223.15       | 481.15       | 361.97     | 0.01         | -                                                | -      | -     | -       | 52.1                                                   | 55.7 | 3.7   | 7.0     |
| 829              | 682              | V   | E0235a  |      | 194.35       | 476.85       | 298.15     | 1.0          | 860.2                                            | 842.2  | -18.0 | -2.1    | -                                                      | -    | -     | -       |
| 830              | 682              | V   | E0235b  |      | 194.35       | 476.85       | 358.53     | 0.01         | -                                                | -      | -     | -       | 51.9                                                   | 56.1 | 4.2   | 8.2     |
| 831              | 683              | V   | E0236a  |      | 195.15       | 479.15       | 298.15     | 1.01         | 851.0                                            | 841.9  | -9.1  | -1.1    | -                                                      | -    | -     | -       |
| 832              | 683              | V   | E0236b  |      | 195.15       | 479.15       | 361.97     | 0.01         | -                                                | -      | -     | -       | 51.4                                                   | 55.7 | 4.3   | 8.3     |
| 833              | 684              | V   | E0237a  |      | -            | 483.15       | 298.15     | 1.0          | 864.0                                            | 844.0  | -19.9 | -2.3    | -                                                      | -    | -     | -       |
| 834              | 684              | V   | E0237b  |      | -            | 483.15       | 364.47     | 0.01         | -                                                | -      | -     | -       | 52.5                                                   | 55.9 | 3.4   | 6.5     |
| 835              | 685              | V   | E0238a  |      | 235.15       | 484.45       | 298.15     | 1.0          | 864.3                                            | 853.7  | -10.6 | -1.2    | 60.7                                                   | 63.2 | 2.5   | 4.2     |
| 836              | 686              | V   | E7401a  |      | -            | -            | 293.0      | 1.0          | -                                                | -      | -     | -       | 55.6                                                   | 57.5 | 1.9   | 3.4     |
| 837              | 687              | V   | E7403a  |      | -            | -            | 298.15     | 1.0          | 1061.4                                           | 1027.6 | -33.8 | -3.2    | -                                                      | -    | -     | -       |
| 838              | 688              | V   | E7404a  |      | -            | 469.15       | 298.15     | 1.0          | 1076.0                                           | 1027.5 | -48.5 | -4.5    | -                                                      | -    | -     | -       |
| 839              | 688              | V   | E7404b  |      | -            | 469.15       | 469.15     | 1.0          | -                                                | -      | -     | -       | 40.9                                                   | 47.4 | 6.5   | 15.8    |
| 840              | 689              | V   | E7405a  |      | -            | -            | 328.0      | 1.0          | -                                                | -      | -     | -       | 57.9                                                   | 55.5 | -2.4  | -4.2    |
| 841              | 690              | V   | E7406a  |      | -            | 463.65       | 293.15     | 1.0          | 1059.0                                           | 1023.3 | -35.7 | -3.4    | -                                                      | -    | -     | -       |
| 842              | 690              | V   | E7406b  |      | -            | 463.65       | 323.0      | 1.0          | -                                                | -      | -     | -       | 54.9                                                   | 60.5 | 5.6   | 10.2    |
| 843              | 691              | V   | E7407a  |      | 223.15       | 472.05       | 298.15     | 1.0          | 1049.8                                           | 1006.1 | -43.7 | -4.2    | 58.7                                                   | 60.8 | 2.1   | 3.5     |
| 844              | 692              | V   | E7408a  |      | -            | 481.35       | 293.15     | 1.0          | 1076.0                                           | 1027.5 | -48.5 | -4.5    | -                                                      | -    | -     | -       |
| 845              | 692              | V   | E7408b  |      | -            | 481.35       | 481.35     | 1.0          | -                                                | -      | -     | -       | 42.1                                                   | 48.0 | 5.9   | 14.0    |
| 846              | 693              | V   | E7409a  |      | 230.65       | 487.15       | 293.15     | 1.01         | 1087.7                                           | 1045.8 | -41.9 | -3.9    | 65.7                                                   | 67.5 | 1.8   | 2.7     |
| 847              | 694              | V   | E7411a  | ×    | -            | -            | 358.0      | 1.0          | -                                                | -      | -     | -       | 72.1                                                   | 57.8 | -14.3 | -19.9   |
| 848              | 695              | V   | E7412a  |      | -            | 482.65       | 293.15     | 1.0          | 1054.7                                           | 1036.0 | -18.6 | -1.8    | -                                                      | -    | -     | -       |
| 849              | 695              | V   | E7412b  |      | -            | 482.65       | 482.65     | 1.0          | -                                                | -      | -     | -       | 42.2                                                   | 49.6 | 7.4   | 17.5    |
| 850              | 696              | V   | E8402a  |      | -            | 463.15       | 298.15     | 1.0          | 989.2                                            | 967.2  | -22.0 | -2.2    | 60.2                                                   | 61.1 | 0.9   | 1.6     |
| 851              | 697              | V   | E8403a  |      | -            | -            | 298.15     | 1.0          | 1036.9                                           | 1008.8 | -28.1 | -2.7    | -                                                      | -    | -     | -       |
| 852              | 698              | V   | E8404a  |      | -            | 474.15       | 298.15     | 1.0          | 1017.4                                           | 970.7  | -46.7 | -4.6    | -                                                      | -    | -     | -       |
| 853              | 698              | V   | E8404b  |      | -            | 474.15       | 327.0      | 1.0          | -                                                | -      | -     | -       | 52.5                                                   | 58.8 | 6.3   | 11.9    |
| 854              | 699              | V   | E8407a  |      | 228.85       | 484.15       | 298.15     | 1.0          | 1014.0                                           | 991.7  | -22.3 | -2.2    | -                                                      | -    | -     | -       |
| 855              | 699              | V   | E8407b  |      | 228.85       | 484.15       | 341.0      | 1.0          | -                                                | -      | -     | -       | 57.8                                                   | 62.5 | 4.7   | 8.1     |
| 856              | 700              | V   | E8408a  |      | 251.55       | 489.65       | 298.15     | 1.0          | 1035.3                                           | 988.2  | -47.1 | -4.5    | 64.5                                                   | 65.4 | 0.9   | 1.4     |
| 857              | 701              | V   | E8409a  |      | 283.45       | 495.09       | 298.15     | 1.0          | 1057.6                                           | 1020.8 | -36.7 | -3.5    | 69.0                                                   | 71.4 | 2.4   | 3.5     |
| 858              | 702              | V   | E8410a  |      | -            | 484.15       | 293.15     | 1.0          | 1042.0                                           | 993.9  | -48.1 | -4.6    | 67.6                                                   | 67.5 | -0.1  | -0.2    |
| 859              | 703              | V   | E8411a  | ×    | -            | -            | 367.0      | 1.0          | -                                                | -      | -     | -       | 74.7                                                   | 60.3 | -14.4 | -19.3   |
| 860              | 704              | V   | E8412a  |      | 285.15       | 502.15       | 293.15     | 1.0          | 1046.0                                           | 1014.5 | -31.5 | -3.0    | -                                                      | -    | -     | -       |
| 861              | 704              | V   | E8412b  |      | 285.15       | 502.15       | 502.15     | 1.0          | -                                                | -      | -     | -       | 44.1                                                   | 51.8 | 7.7   | 17.4    |
| 862              | 705              | V   | E9402a  |      | -            | 470.15       | 470.15     | 1.0          | -                                                | -      | -     | -       | 41.0                                                   | 45.2 | 4.2   | 10.3    |

Table S.7 – Comparison of experimental and simulated properties (continued)

| $n_{\text{sim}}$ | $n_{\text{iso}}$ | Set | Outlier | code | $T_m$<br>[K] | $T_b$<br>[K] | $T$<br>[K] | $P$<br>[bar] | $\rho_{\text{liq}}[\text{kg}\cdot\text{m}^{-3}]$ |        |       |         | $\Delta H_{\text{vap}}[\text{kJ}\cdot\text{mol}^{-1}]$ |      |       |         |
|------------------|------------------|-----|---------|------|--------------|--------------|------------|--------------|--------------------------------------------------|--------|-------|---------|--------------------------------------------------------|------|-------|---------|
|                  |                  |     |         |      |              |              |            |              | exp                                              | sim    | dev   | err [%] | exp                                                    | sim  | dev   | err [%] |
| 863              | 706              | V   | E9406a  |      | -            | 509.23       | 298.0      | 1.0          | -                                                | -      | -     | -       | 63.9                                                   | 62.5 | -1.4  | -2.2    |
| 864              | 707              | V   | E9407a  |      | -            | 481.15       | 298.15     | 1.0          | 1000.7                                           | 960.8  | -39.9 | -4.0    | -                                                      | -    | -     | -       |
| 865              | 707              | V   | E9407b  |      | -            | 481.15       | 338.0      | 1.0          | -                                                | -      | -     | -       | 55.3                                                   | 60.6 | 5.3   | 9.6     |
| 866              | 708              | V   | E9408a  |      | -            | 490.65       | 490.65     | 1.0          | -                                                | -      | -     | -       | 43.0                                                   | 47.6 | 4.6   | 10.8    |
| 867              | 709              | V   | E9409a  |      | -            | -            | 340.0      | 1.0          | -                                                | -      | -     | -       | 63.2                                                   | 61.7 | -1.5  | -2.4    |
| 868              | 710              | V   | E9410a  |      | -            | 502.15       | 298.0      | 1.0          | -                                                | -      | -     | -       | 66.2                                                   | 68.1 | 1.9   | 2.8     |
| 869              | 711              | V   | E9411a  |      | 249.05       | 509.65       | 293.15     | 1.0          | 1022.0                                           | 980.1  | -41.9 | -4.1    | 67.0                                                   | 71.5 | 4.5   | 6.7     |
| 870              | 712              | V   | E9412a  |      | 252.15       | 509.23       | 293.15     | 1.0          | 1039.1                                           | 1007.1 | -32.0 | -3.1    | 73.5                                                   | 76.0 | 2.5   | 3.4     |
| 871              | 713              | V   | E9413a  | ×    | -            | -            | 382.0      | 1.0          | -                                                | -      | -     | -       | 75.4                                                   | 62.7 | -12.7 | -16.8   |
| 872              | 714              | V   | E9414a  |      | 275.15       | 514.15       | 293.15     | 1.0          | 1029.6                                           | 997.6  | -32.0 | -3.1    | -                                                      | -    | -     | -       |
| 873              | 714              | V   | E9414b  | ×    | 275.15       | 514.15       | 514.15     | 1.0          | -                                                | -      | -     | -       | 45.2                                                   | 53.9 | 8.7   | 19.2    |
| 874              | 715              | V   | E0401a  |      | -            | -            | 298.0      | 1.0          | -                                                | -      | -     | -       | 63.5                                                   | 62.2 | -1.3  | -2.1    |
| 875              | 716              | V   | E0403a  |      | -            | -            | 332.0      | 1.0          | -                                                | -      | -     | -       | 53.2                                                   | 60.0 | 6.8   | 12.9    |
| 876              | 717              | V   | E0404a  | ×    | -            | 502.15       | 351.0      | 1.0          | -                                                | -      | -     | -       | 55.5                                                   | 64.9 | 9.4   | 16.9    |
| 877              | 718              | V   | E0405a  |      | -            | 488.15       | 293.15     | 1.0          | 996.1                                            | 955.9  | -40.2 | -4.0    | -                                                      | -    | -     | -       |
| 878              | 718              | V   | E0405b  |      | -            | 488.15       | 488.15     | 1.0          | -                                                | -      | -     | -       | 42.8                                                   | 49.1 | 6.3   | 14.8    |
| 879              | 719              | V   | E0406a  |      | -            | -            | 298.15     | 1.0          | 980.3                                            | 935.1  | -45.2 | -4.6    | 70.8                                                   | 67.0 | -3.8  | -5.4    |
| 880              | 720              | V   | E0407a  |      | -            | 494.15       | 298.15     | 1.0          | 982.8                                            | 950.6  | -32.2 | -3.3    | -                                                      | -    | -     | -       |
| 881              | 720              | V   | E0407b  |      | -            | 494.15       | 494.15     | 1.0          | -                                                | -      | -     | -       | 43.3                                                   | 50.1 | 6.8   | 15.7    |
| 882              | 721              | V   | E0408a  |      | 242.65       | 514.15       | 298.15     | 1.0          | 983.3                                            | 964.9  | -18.4 | -1.9    | 71.4                                                   | 75.8 | 4.4   | 6.1     |
| 883              | 722              | V   | E0409a  |      | 267.25       | 523.95       | 298.15     | 1.0          | 997.4                                            | 955.5  | -41.8 | -4.2    | 71.0                                                   | 72.7 | 1.7   | 2.5     |
| 884              | 723              | V   | E0410a  |      | 253.15       | 518.15       | 298.15     | 1.0          | 1003.7                                           | 963.9  | -39.8 | -4.0    | 73.0                                                   | 75.3 | 2.4   | 3.2     |
| 885              | 724              | V   | E0411a  |      | 279.15       | 541.15       | 298.15     | 1.0          | 1019.2                                           | 988.6  | -30.6 | -3.0    | 78.1                                                   | 80.0 | 1.9   | 2.4     |
| 886              | 725              | V   | E0412a  |      | -            | 513.15       | 298.15     | 1.0          | 995.3                                            | 957.9  | -37.4 | -3.8    | 73.2                                                   | 74.8 | 1.6   | 2.1     |
| 887              | 726              | V   | F7202a  |      | 210.55       | 428.65       | 298.15     | 1.0          | 874.6                                            | 873.0  | -1.6  | -0.2    | 50.0                                                   | 49.5 | -0.5  | -1.0    |
| 888              | 727              | V   | F8201a  |      | -            | 451.25       | 302.25     | 1.0          | 869.0                                            | 865.8  | -3.2  | -0.4    | 53.8                                                   | 53.9 | 0.1   | 0.2     |
| 889              | 728              | V   | F9201a  |      | 234.05       | 471.95       | 298.15     | 1.0          | 871.0                                            | 867.6  | -3.4  | -0.4    | 58.2                                                   | 59.4 | 1.2   | 2.1     |
| 890              | 729              | V   | F0203a  |      | 240.15       | 485.72       | 293.15     | 1.0          | 867.0                                            | 865.5  | -1.4  | -0.2    | -                                                      | -    | -     | -       |
| 891              | 730              | V   | L7101a  |      | 290.15       | 404.15       | 298.15     | 1.0          | 833.5                                            | 847.5  | 14.0  | 1.7     | -                                                      | -    | -     | -       |
| 892              | 730              | V   | L7101b  |      | 290.15       | 404.15       | 313.0      | 1.0          | -                                                | -      | -     | -       | 48.7                                                   | 54.8 | 6.1   | 12.5    |
| 893              | 731              | V   | L7102a  |      | -            | 430.15       | 293.15     | 1.0          | 846.6                                            | 849.8  | 3.1   | 0.4     | -                                                      | -    | -     | -       |
| 894              | 732              | V   | L7103a  |      | -            | 420.15       | 293.15     | 1.0          | 827.0                                            | 837.4  | 10.4  | 1.3     | -                                                      | -    | -     | -       |
| 895              | 733              | V   | L7104a  |      | -            | 413.15       | 298.15     | 1.0          | 837.3                                            | 829.2  | -8.1  | -1.0    | -                                                      | -    | -     | -       |
| 896              | 733              | V   | L7104b  |      | -            | 413.15       | 333.0      | 1.0          | -                                                | -      | -     | -       | 53.2                                                   | 53.6 | 0.4   | 0.7     |
| 897              | 734              | V   | L7105a  |      | -            | 433.15       | 298.15     | 1.0          | 823.8                                            | 842.1  | 18.4  | 2.2     | -                                                      | -    | -     | -       |
| 898              | 735              | V   | L7106a  |      | 282.45       | 409.15       | 298.15     | 1.0          | 822.4                                            | 821.7  | -0.7  | -0.1    | -                                                      | -    | -     | -       |
| 899              | 735              | V   | L7106b  |      | 282.45       | 409.15       | 333.0      | 1.0          | -                                                | -      | -     | -       | 51.4                                                   | 53.7 | 2.3   | 4.4     |
| 900              | 736              | V   | L7107a  |      | -            | 412.15       | 298.15     | 1.0          | 828.5                                            | 823.9  | -4.6  | -0.6    | -                                                      | -    | -     | -       |
| 901              | 737              | V   | L7108a  |      | -            | 411.15       | 293.15     | 1.0          | 811.9                                            | 806.5  | -5.4  | -0.7    | -                                                      | -    | -     | -       |
| 902              | 738              | V   | L7109a  |      | -            | 406.15       | 298.15     | 1.0          | 810.0                                            | 800.8  | -9.2  | -1.1    | -                                                      | -    | -     | -       |
| 903              | 738              | V   | L7109b  |      | -            | 406.15       | 343.0      | 1.0          | -                                                | -      | -     | -       | 49.7                                                   | 50.3 | 0.6   | 1.2     |
| 904              | 739              | V   | L7110a  |      | -            | 426.15       | 294.15     | 1.0          | 836.0                                            | 818.9  | -17.1 | -2.0    | -                                                      | -    | -     | -       |
| 905              | 740              | V   | L7111a  |      | -            | 411.95       | 298.15     | 1.0          | 824.9                                            | 810.0  | -14.9 | -1.8    | -                                                      | -    | -     | -       |
| 906              | 740              | V   | L7111b  |      | -            | 411.95       | 322.0      | 1.0          | -                                                | -      | -     | -       | 53.6                                                   | 56.6 | 3.0   | 5.6     |
| 907              | 741              | V   | L7112a  |      | -            | 430.15       | 293.15     | 1.0          | 828.2                                            | 846.9  | 18.7  | 2.3     | -                                                      | -    | -     | -       |
| 908              | 741              | V   | L7112b  |      | -            | 430.15       | 373.0      | 1.0          | -                                                | -      | -     | -       | 55.7                                                   | 50.0 | -5.8  | -10.3   |
| 909              | 742              | V   | L7113a  |      | 260.15       | 415.65       | 298.15     | 1.0          | 839.6                                            | 829.0  | -10.5 | -1.2    | 57.3                                                   | 59.0 | 1.7   | 3.0     |
| 910              | 743              | V   | L7114a  |      | -            | 438.15       | 293.15     | 1.0          | 832.0                                            | 841.6  | 9.6   | 1.1     | -                                                      | -    | -     | -       |

Table S.7 – Comparison of experimental and simulated properties (continued)

| $n_{\text{sim}}$ | $n_{\text{iso}}$ | Set | Outlier | code   | $T_m$<br>[K] | $T_b$<br>[K] | $T$<br>[K] | $P$<br>[bar] | $\rho_{\text{liq}}[\text{kg}\cdot\text{m}^{-3}]$ |       |       |         | $\Delta H_{\text{vap}}[\text{kJ}\cdot\text{mol}^{-1}]$ |      |      |         |
|------------------|------------------|-----|---------|--------|--------------|--------------|------------|--------------|--------------------------------------------------|-------|-------|---------|--------------------------------------------------------|------|------|---------|
|                  |                  |     |         |        |              |              |            |              | exp                                              | sim   | dev   | err [%] | exp                                                    | sim  | dev  | err [%] |
| 911              | 744              | V   | L7115a  | -      | -            | 426.15       | 293.15     | 1.0          | 837.9                                            | 830.7 | -7.2  | -0.8    | -                                                      | -    | -    | -       |
| 912              | 745              | V   | L7116a  | -      | -            | 415.95       | 298.15     | 1.0          | 820.2                                            | 814.1 | -6.0  | -0.7    | -                                                      | -    | -    | -       |
| 913              | 745              | V   | L7116b  | -      | -            | 415.95       | 338.0      | 1.0          | -                                                | -     | -     | -       | 53.6                                                   | 54.7 | 1.1  | 2.0     |
| 914              | 746              | V   | L7117a  | -      | -            | 433.15       | 293.15     | 1.0          | 815.1                                            | 822.5 | 7.4   | 0.9     | -                                                      | -    | -    | -       |
| 915              | 747              | V   | L7118a  | -      | -            | 415.95       | 298.15     | 1.0          | 809.8                                            | 796.3 | -13.5 | -1.7    | 58.6                                                   | 60.3 | 1.7  | 2.9     |
| 916              | 748              | V   | L7119a  | -      | -            | 435.15       | 298.15     | 1.0          | 832.7                                            | 827.4 | -5.3  | -0.6    | -                                                      | -    | -    | -       |
| 917              | 749              | V   | L7120a  | -      | -            | 425.15       | 298.15     | 1.0          | 833.3                                            | 814.4 | -18.9 | -2.3    | -                                                      | -    | -    | -       |
| 918              | 750              | V   | L7121a  | -      | -            | 437.15       | 296.15     | 1.0          | 836.0                                            | 829.4 | -6.6  | -0.8    | -                                                      | -    | -    | -       |
| 919              | 751              | V   | L7122a  | -      | -            | 422.15       | 314.89     | 0.01         | 805.7                                            | 797.3 | -8.4  | -1.0    | -                                                      | -    | -    | -       |
| 920              | 752              | V   | L7123a  | -      | -            | 438.15       | 297.15     | 1.0          | 819.0                                            | 823.2 | 4.2   | 0.5     | -                                                      | -    | -    | -       |
| 921              | 753              | V   | L7124a  | -      | -            | 425.15       | 298.15     | 1.0          | 822.0                                            | 802.3 | -19.7 | -2.4    | -                                                      | -    | -    | -       |
| 922              | 754              | V   | L7125a  | -      | -            | 418.15       | 293.15     | 1.0          | 823.9                                            | 804.5 | -19.4 | -2.4    | -                                                      | -    | -    | -       |
| 923              | 754              | V   | L7125b  | -      | -            | 418.15       | 338.0      | 1.0          | -                                                | -     | -     | -       | 55.7                                                   | 56.4 | 0.7  | 1.3     |
| 924              | 755              | V   | L7126a  | -      | -            | 432.15       | 298.15     | 1.0          | 816.0                                            | 810.8 | -5.2  | -0.6    | -                                                      | -    | -    | -       |
| 925              | 756              | V   | L7127a  | -      | -            | 424.15       | 298.15     | 1.0          | 817.7                                            | 798.4 | -19.3 | -2.4    | -                                                      | -    | -    | -       |
| 926              | 757              | V   | L7128a  | -      | -            | 421.15       | 293.15     | 1.0          | 833.1                                            | 798.0 | -35.1 | -4.2    | 59.8                                                   | 62.9 | 3.1  | 5.2     |
| 927              | 758              | V   | L7129a  | -      | -            | 424.15       | 293.15     | 1.0          | 813.1                                            | 785.9 | -27.2 | -3.3    | -                                                      | -    | -    | -       |
| 928              | 759              | V   | L7130a  | -      | -            | 439.15       | 328.67     | 0.01         | 803.5                                            | 802.5 | -1.0  | -0.1    | -                                                      | -    | -    | -       |
| 929              | 760              | V   | L7131a  | -      | -            | 439.15       | 298.15     | 1.0          | 828.8                                            | 819.3 | -9.5  | -1.1    | -                                                      | -    | -    | -       |
| 930              | 761              | V   | L7132a  | -      | -            | 445.15       | 298.15     | 1.0          | 824.5                                            | 817.0 | -7.5  | -0.9    | -                                                      | -    | -    | -       |
| 931              | 762              | V   | L7133a  | -      | -            | 446.15       | 297.15     | 1.0          | 821.0                                            | 816.1 | -4.9  | -0.6    | -                                                      | -    | -    | -       |
| 932              | 762              | V   | L7133b  | -      | -            | 446.15       | 363.0      | 1.0          | -                                                | -     | -     | -       | 62.6                                                   | 56.5 | -6.1 | -9.7    |
| 933              | 763              | V   | L7134a  | -      | -            | 436.15       | 293.15     | 1.0          | 827.0                                            | 813.9 | -13.1 | -1.6    | -                                                      | -    | -    | -       |
| 934              | 764              | V   | L7135a  | 231.95 | -            | 427.85       | 298.15     | 1.0          | 815.6                                            | 795.1 | -20.5 | -2.5    | 62.4                                                   | 63.6 | 1.2  | 1.9     |
| 935              | 765              | V   | L7136a  | -      | -            | 429.85       | 298.15     | 1.0          | 816.5                                            | 794.9 | -21.6 | -2.6    | -                                                      | -    | -    | -       |
| 936              | 765              | V   | L7136b  | -      | -            | 429.85       | 364.0      | 1.0          | -                                                | -     | -     | -       | 53.1                                                   | 54.4 | 1.3  | 2.5     |
| 937              | 766              | V   | L7137a  | -      | -            | 445.15       | 298.15     | 1.0          | 819.2                                            | 806.2 | -12.9 | -1.6    | -                                                      | -    | -    | -       |
| 938              | 767              | V   | L7138a  | -      | -            | 432.35       | 298.15     | 1.0          | 813.4                                            | 788.5 | -24.9 | -3.1    | 62.1                                                   | 63.3 | 1.2  | 1.9     |
| 939              | 768              | V   | L7139a  | 239.95 | -            | 449.45       | 298.15     | 1.0          | 819.2                                            | 811.2 | -7.9  | -1.0    | 66.5                                                   | 65.7 | -0.8 | -1.1    |
| 940              | 769              | V   | L8102a  | -      | -            | 433.15       | 298.15     | 1.0          | 815.1                                            | 867.5 | 52.4  | 6.4     | -                                                      | -    | -    | -       |
| 941              | 770              | V   | L8103a  | -      | -            | 425.15       | 298.15     | 1.0          | 842.9                                            | 856.6 | 13.7  | 1.6     | -                                                      | -    | -    | -       |
| 942              | 770              | V   | L8103b  | -      | -            | 425.15       | 333.0      | 1.0          | -                                                | -     | -     | -       | 47.3                                                   | 54.9 | 7.6  | 16.0    |
| 943              | 771              | V   | L8104a  | 253.15 | -            | 419.55       | 293.15     | 1.0          | 823.7                                            | 820.2 | -3.5  | -0.4    | -                                                      | -    | -    | -       |
| 944              | 772              | V   | L8105a  | -      | -            | 438.15       | 293.15     | 1.0          | 855.7                                            | 860.8 | 5.0   | 0.6     | -                                                      | -    | -    | -       |
| 945              | 773              | V   | L8106a  | -      | -            | 430.15       | 293.15     | 1.0          | 849.2                                            | 851.0 | 1.8   | 0.2     | -                                                      | -    | -    | -       |
| 946              | 774              | V   | L8107a  | -      | -            | 431.15       | 293.15     | 1.0          | 840.8                                            | 846.1 | 5.3   | 0.6     | -                                                      | -    | -    | -       |
| 947              | 775              | V   | L8108a  | 260.15 | -            | 424.15       | 293.15     | 1.0          | 832.4                                            | 837.8 | 5.4   | 0.7     | -                                                      | -    | -    | -       |
| 948              | 775              | V   | L8108b  | 260.15 | -            | 424.15       | 343.0      | 1.0          | -                                                | -     | -     | -       | 57.1                                                   | 54.4 | -2.7 | -4.8    |
| 949              | 776              | V   | L8109a  | -      | -            | 431.15       | 293.15     | 1.0          | 808.0                                            | 839.8 | 31.8  | 3.9     | -                                                      | -    | -    | -       |
| 950              | 777              | V   | L8110a  | -      | -            | 433.00       | 293.15     | 1.0          | 857.6                                            | 859.3 | 1.7   | 0.2     | -                                                      | -    | -    | -       |
| 951              | 778              | V   | L8111a  | -      | -            | 433.15       | 293.15     | 1.0          | 829.5                                            | 852.6 | 23.1  | 2.8     | -                                                      | -    | -    | -       |
| 952              | 779              | V   | L8112a  | -      | -            | 432.15       | 293.15     | 1.0          | 834.1                                            | 849.4 | 15.2  | 1.8     | -                                                      | -    | -    | -       |
| 953              | 780              | V   | L8113a  | -      | -            | 433.00       | 293.15     | 1.0          | 845.7                                            | 842.2 | -3.5  | -0.4    | -                                                      | -    | -    | -       |
| 954              | 781              | V   | L8114a  | -      | -            | 425.15       | 298.15     | 1.0          | 834.5                                            | 839.8 | 5.3   | 0.6     | -                                                      | -    | -    | -       |
| 955              | 782              | V   | L8115a  | -      | -            | 431.35       | 293.15     | 1.0          | 837.1                                            | 833.8 | -3.3  | -0.4    | -                                                      | -    | -    | -       |
| 956              | 783              | V   | L8116a  | -      | -            | 446.00       | 298.15     | 1.0          | 842.5                                            | 851.0 | 8.5   | 1.0     | -                                                      | -    | -    | -       |
| 957              | 784              | V   | L8118a  | -      | -            | 429.25       | 293.15     | 1.0          | 834.2                                            | 830.7 | -3.5  | -0.4    | -                                                      | -    | -    | -       |
| 958              | 785              | V   | L8119a  | -      | -            | 430.95       | 298.15     | 1.0          | 834.6                                            | 834.4 | -0.2  | -0.0    | -                                                      | -    | -    | -       |



Table S.7 – Comparison of experimental and simulated properties (continued)

| $n_{\text{sim}}$ | $n_{\text{iso}}$ | Set | Outlier | code | $T_m$<br>[K] | $T_b$<br>[K] | $T$<br>[K] | $P$<br>[bar] | $\rho_{\text{liq}}[\text{kg}\cdot\text{m}^{-3}]$ |       |       |         | $\Delta H_{\text{vap}}[\text{kJ}\cdot\text{mol}^{-1}]$ |      |      |         |
|------------------|------------------|-----|---------|------|--------------|--------------|------------|--------------|--------------------------------------------------|-------|-------|---------|--------------------------------------------------------|------|------|---------|
|                  |                  |     |         |      |              |              |            |              | exp                                              | sim   | dev   | err [%] | exp                                                    | sim  | dev  | err [%] |
| 959              | 786              | V   | L8120a  |      | -            | 433.25       | 298.15     | 1.0          | 831.0                                            | 828.5 | -2.5  | -0.3    | -                                                      | -    | -    | -       |
| 960              | 787              | V   | L8121a  |      | -            | 441.45       | 293.15     | 1.0          | 838.4                                            | 834.3 | -4.1  | -0.5    | -                                                      | -    | -    | -       |
| 961              | 787              | V   | L8121b  |      | -            | 441.45       | 348.0      | 1.0          | -                                                | -     | -     | -       | 54.7                                                   | 56.4 | 1.6  | 3.0     |
| 962              | 788              | V   | L8122a  |      | -            | 425.15       | 298.15     | 1.0          | 827.0                                            | 815.9 | -11.1 | -1.3    | -                                                      | -    | -    | -       |
| 963              | 789              | V   | L8123a  |      | -            | 444.15       | 293.15     | 1.0          | 833.0                                            | 830.4 | -2.6  | -0.3    | -                                                      | -    | -    | -       |
| 964              | 790              | V   | L8124a  |      | -            | 426.15       | 293.15     | 1.0          | 833.9                                            | 819.7 | -14.2 | -1.7    | -                                                      | -    | -    | -       |
| 965              | 791              | V   | L8126a  |      | -            | 423.85       | 301.15     | 1.0          | 806.5                                            | 811.1 | 4.6   | 0.6     | -                                                      | -    | -    | -       |
| 966              | 792              | V   | L8127a  |      | -            | 425.65       | 298.15     | 1.0          | 811.5                                            | 796.3 | -15.2 | -1.9    | -                                                      | -    | -    | -       |
| 967              | 793              | V   | L8128a  |      | -            | 446.15       | 298.15     | 1.0          | 842.5                                            | 839.6 | -2.9  | -0.3    | -                                                      | -    | -    | -       |
| 968              | 794              | V   | L8130a  |      | -            | 456.15       | 293.15     | 1.0          | 849.8                                            | 846.0 | -3.8  | -0.5    | -                                                      | -    | -    | -       |
| 969              | 795              | V   | L8131a  |      | -            | 444.15       | 331.02     | 0.01         | 805.0                                            | 803.8 | -1.2  | -0.1    | -                                                      | -    | -    | -       |
| 970              | 796              | V   | L8134a  |      | -            | 432.15       | 298.15     | 1.0          | 813.5                                            | 805.9 | -7.6  | -0.9    | -                                                      | -    | -    | -       |
| 971              | 796              | V   | L8134b  |      | -            | 432.15       | 352.0      | 1.0          | -                                                | -     | -     | -       | 55.0                                                   | 56.3 | 1.3  | 2.3     |
| 972              | 797              | V   | L8137a  |      | -            | 432.15       | 298.15     | 1.0          | 834.2                                            | 830.3 | -3.9  | -0.5    | -                                                      | -    | -    | -       |
| 973              | 797              | V   | L8137b  | ×    | -            | 432.15       | 345.0      | 1.0          | -                                                | -     | -     | -       | 49.2                                                   | 57.3 | 8.1  | 16.5    |
| 974              | 798              | V   | L8138a  |      | -            | 454.00       | 293.15     | 1.0          | 839.0                                            | 843.8 | 4.8   | 0.6     | -                                                      | -    | -    | -       |
| 975              | 799              | V   | L8140a  |      | -            | 445.65       | 293.15     | 1.0          | 826.5                                            | 832.6 | 6.1   | 0.7     | -                                                      | -    | -    | -       |
| 976              | 800              | V   | L8141a  |      | 191.15       | 434.25       | 298.15     | 1.0          | 820.2                                            | 817.8 | -2.4  | -0.3    | -                                                      | -    | -    | -       |
| 977              | 800              | V   | L8141b  |      | 191.15       | 434.25       | 345.0      | 1.0          | -                                                | -     | -     | -       | 54.8                                                   | 58.1 | 3.3  | 6.0     |
| 978              | 801              | V   | L8142a  |      | 190.15       | 434.15       | 298.15     | 1.0          | 824.9                                            | 816.3 | -8.6  | -1.0    | -                                                      | -    | -    | -       |
| 979              | 801              | V   | L8142b  |      | 190.15       | 434.15       | 353.0      | 1.0          | -                                                | -     | -     | -       | 54.7                                                   | 57.0 | 2.3  | 4.1     |
| 980              | 802              | V   | L8144a  |      | 222.75       | 429.85       | 298.15     | 1.0          | 805.0                                            | 801.6 | -3.4  | -0.4    | -                                                      | -    | -    | -       |
| 981              | 802              | V   | L8144b  |      | 222.75       | 429.85       | 358.0      | 1.0          | -                                                | -     | -     | -       | 53.1                                                   | 56.4 | 3.3  | 6.2     |
| 982              | 803              | V   | L8145a  |      | -            | 437.15       | 332.39     | 0.01         | 812.9                                            | 799.1 | -13.8 | -1.7    | -                                                      | -    | -    | -       |
| 983              | 804              | V   | L8146a  |      | 150.15       | 428.55       | 298.15     | 1.0          | 794.2                                            | 814.9 | 20.7  | 2.6     | -                                                      | -    | -    | -       |
| 984              | 804              | V   | L8146b  | ×    | 150.15       | 428.55       | 318.66     | 0.01         | -                                                | -     | -     | -       | 43.5                                                   | 64.4 | 20.8 | 47.8    |
| 985              | 805              | V   | L8147a  |      | -            | 437.85       | 298.15     | 1.0          | 833.5                                            | 813.6 | -19.9 | -2.4    | -                                                      | -    | -    | -       |
| 986              | 805              | V   | L8147b  | ×    | -            | 437.85       | 355.0      | 1.0          | -                                                | -     | -     | -       | 48.0                                                   | 58.1 | 10.1 | 21.0    |
| 987              | 806              | V   | L8148a  |      | -            | 439.25       | 298.15     | 1.0          | 817.6                                            | 806.5 | -11.1 | -1.4    | -                                                      | -    | -    | -       |
| 988              | 806              | V   | L8148b  | ×    | -            | 439.25       | 356.0      | 1.0          | -                                                | -     | -     | -       | 48.0                                                   | 58.7 | 10.7 | 22.3    |
| 989              | 807              | V   | L8149a  |      | -            | 440.75       | 298.15     | 1.0          | 821.0                                            | 803.9 | -17.1 | -2.1    | -                                                      | -    | -    | -       |
| 990              | 807              | V   | L8149b  |      | -            | 440.75       | 364.0      | 1.0          | -                                                | -     | -     | -       | 54.8                                                   | 56.6 | 1.8  | 3.2     |
| 991              | 808              | V   | L8150a  |      | -            | 449.65       | 293.15     | 1.0          | 827.3                                            | 824.5 | -2.8  | -0.3    | -                                                      | -    | -    | -       |
| 992              | 808              | V   | L8150b  |      | -            | 449.65       | 365.0      | 1.0          | -                                                | -     | -     | -       | 53.3                                                   | 57.7 | 4.4  | 8.2     |
| 993              | 809              | V   | L8152a  |      | 181.95       | 426.75       | 298.15     | 1.0          | 814.1                                            | 808.8 | -5.4  | -0.7    | -                                                      | -    | -    | -       |
| 994              | 810              | V   | L8153a  |      | -            | 456.15       | 293.15     | 1.0          | 828.2                                            | 823.1 | -5.1  | -0.6    | -                                                      | -    | -    | -       |
| 995              | 811              | V   | L8154a  |      | 171.15       | 444.75       | 298.15     | 1.0          | 799.0                                            | 804.6 | 5.6   | 0.7     | -                                                      | -    | -    | -       |
| 996              | 811              | V   | L8154b  |      | 171.15       | 444.75       | 366.0      | 1.0          | -                                                | -     | -     | -       | 54.2                                                   | 57.8 | 3.6  | 6.6     |
| 997              | 812              | V   | L8155a  |      | -            | 452.15       | 298.15     | 1.0          | 824.5                                            | 807.5 | -17.0 | -2.1    | -                                                      | -    | -    | -       |
| 998              | 813              | V   | L8156a  |      | 212.15       | 445.05       | 298.15     | 1.0          | 810.0                                            | 796.9 | -13.1 | -1.6    | -                                                      | -    | -    | -       |
| 999              | 813              | V   | L8156b  | ×    | 212.15       | 445.05       | 363.0      | 1.0          | -                                                | -     | -     | -       | 47.2                                                   | 57.9 | 10.7 | 22.8    |
| 1000             | 814              | V   | L8157a  |      | 192.15       | 439.25       | 298.15     | 1.0          | 809.8                                            | 799.5 | -10.2 | -1.3    | -                                                      | -    | -    | -       |
| 1001             | 814              | V   | L8157b  |      | 192.15       | 439.25       | 363.0      | 1.0          | -                                                | -     | -     | -       | 54.8                                                   | 57.3 | 2.5  | 4.6     |
| 1002             | 815              | V   | L8158a  |      | -            | 433.00       | 298.15     | 1.0          | 776.6                                            | 793.4 | 16.8  | 2.2     | -                                                      | -    | -    | -       |
| 1003             | 816              | V   | L8159a  |      | 168.15       | 445.05       | 298.15     | 1.0          | 803.4                                            | 789.7 | -13.7 | -1.7    | -                                                      | -    | -    | -       |
| 1004             | 816              | V   | L8159b  |      | 168.15       | 445.05       | 369.0      | 1.0          | -                                                | -     | -     | -       | 55.2                                                   | 56.7 | 1.5  | 2.6     |
| 1005             | 817              | V   | L8160a  |      | -            | 453.00       | 301.15     | 1.0          | 829.0                                            | 825.6 | -3.4  | -0.4    | -                                                      | -    | -    | -       |
| 1006             | 818              | V   | L8161a  |      | -            | 452.15       | 294.15     | 1.0          | 900.0                                            | 824.5 | -75.5 | -8.4    | -                                                      | -    | -    | -       |

Table S.7 – Comparison of experimental and simulated properties (continued)

| $n_{\text{sim}}$ | $n_{\text{iso}}$ | Set | Outlier | code | $T_m$<br>[K] | $T_b$<br>[K] | $T$<br>[K] | $P$<br>[bar] | $\rho_{\text{liq}}[\text{kg}\cdot\text{m}^{-3}]$ |       |       |         | $\Delta H_{\text{vap}}[\text{kJ}\cdot\text{mol}^{-1}]$ |      |      |         |
|------------------|------------------|-----|---------|------|--------------|--------------|------------|--------------|--------------------------------------------------|-------|-------|---------|--------------------------------------------------------|------|------|---------|
|                  |                  |     |         |      |              |              |            |              | exp                                              | sim   | dev   | err [%] | exp                                                    | sim  | dev  | err [%] |
| 1007             | 819              | V   | L8162a  |      | 203.15       | 457.75       | 298.15     | 1.0          | 828.7                                            | 820.5 | -8.2  | -1.0    | 68.5                                                   | 68.0 | -0.5 | -0.7    |
| 1008             | 820              | V   | L8163a  |      | -            | 456.35       | 298.15     | 1.0          | 806.0                                            | 819.4 | 13.3  | 1.7     | -                                                      | -    | -    | -       |
| 1009             | 820              | V   | L8163b  |      | -            | 456.35       | 372.0      | 1.0          | -                                                | -     | -     | -       | 55.9                                                   | 59.7 | 3.8  | 6.8     |
| 1010             | 821              | V   | L8164a  |      | 183.15       | 459.15       | 298.15     | 1.0          | 784.5                                            | 818.9 | 34.4  | 4.4     | -                                                      | -    | -    | -       |
| 1011             | 821              | V   | L8164b  |      | 183.15       | 459.15       | 375.0      | 1.0          | -                                                | -     | -     | -       | 53.4                                                   | 59.0 | 5.6  | 10.5    |
| 1012             | 822              | V   | L8165a  |      | -            | 459.75       | 298.15     | 1.0          | 815.2                                            | 818.8 | 3.6   | 0.4     | -                                                      | -    | -    | -       |
| 1013             | 822              | V   | L8165b  |      | -            | 459.75       | 379.0      | 1.0          | -                                                | -     | -     | -       | 57.6                                                   | 58.6 | 1.0  | 1.8     |
| 1014             | 823              | V   | L8166a  |      | -            | 448.75       | 298.15     | 1.0          | 798.7                                            | 813.0 | 14.3  | 1.8     | -                                                      | -    | -    | -       |
| 1015             | 824              | V   | L8167a  |      | -            | 449.75       | 298.15     | 1.0          | 815.9                                            | 799.9 | -16.0 | -2.0    | 67.2                                                   | 68.7 | 1.4  | 2.1     |
| 1016             | 825              | V   | L8168a  |      | 228.15       | 447.85       | 298.15     | 1.0          | 817.0                                            | 799.4 | -17.6 | -2.2    | -                                                      | -    | -    | -       |
| 1017             | 826              | V   | L8169a  |      | 167.15       | 460.85       | 298.15     | 1.0          | 817.6                                            | 810.4 | -7.1  | -0.9    | -                                                      | -    | -    | -       |
| 1018             | 826              | V   | L8169b  |      | 167.15       | 460.85       | 383.0      | 1.0          | -                                                | -     | -     | -       | 61.0                                                   | 57.7 | -3.3 | -5.5    |
| 1019             | 827              | V   | L8170a  |      | -            | 452.95       | 298.15     | 1.0          | 817.0                                            | 793.8 | -23.2 | -2.8    | 67.9                                                   | 68.3 | 0.4  | 0.6     |
| 1020             | 828              | V   | L8171a  |      | 258.45       | 468.35       | 298.15     | 1.0          | 821.8                                            | 815.0 | -6.8  | -0.8    | 70.1                                                   | 70.8 | 0.7  | 1.0     |
| 1021             | 829              | V   | L9103a  |      | -            | 447.35       | 344.93     | 0.01         | 814.0                                            | 834.8 | 20.9  | 2.6     | -                                                      | -    | -    | -       |
| 1022             | 830              | V   | L9107a  |      | -            | 447.15       | 298.15     | 1.0          | 852.6                                            | 872.1 | 19.5  | 2.3     | -                                                      | -    | -    | -       |
| 1023             | 831              | V   | L9108a  |      | -            | 439.15       | 294.15     | 1.0          | 832.3                                            | 876.1 | 43.8  | 5.3     | -                                                      | -    | -    | -       |
| 1024             | 832              | V   | L9109a  |      | -            | 446.25       | 293.15     | 1.0          | 846.2                                            | 860.5 | 14.3  | 1.7     | -                                                      | -    | -    | -       |
| 1025             | 832              | V   | L9109b  |      | -            | 446.25       | 358.0      | 1.0          | -                                                | -     | -     | -       | 55.1                                                   | 54.9 | -0.2 | -0.4    |
| 1026             | 833              | V   | L9110a  |      | -            | 466.00       | 293.15     | 1.0          | 847.5                                            | 839.4 | -8.1  | -1.0    | -                                                      | -    | -    | -       |
| 1027             | 834              | V   | L9111a  |      | -            | 439.00       | 293.15     | 1.0          | 835.0                                            | 836.6 | 1.6   | 0.2     | -                                                      | -    | -    | -       |
| 1028             | 835              | V   | L9113a  |      | -            | 451.05       | 298.15     | 1.0          | 854.9                                            | 866.1 | 11.2  | 1.3     | -                                                      | -    | -    | -       |
| 1029             | 835              | V   | L9113b  |      | -            | 451.05       | 384.0      | 1.0          | -                                                | -     | -     | -       | 50.0                                                   | 47.7 | -2.3 | -4.5    |
| 1030             | 836              | V   | L9115a  |      | -            | 444.15       | 293.15     | 1.0          | 848.8                                            | 855.1 | 6.3   | 0.7     | -                                                      | -    | -    | -       |
| 1031             | 837              | V   | L9116a  |      | -            | 439.00       | 293.15     | 1.0          | 825.6                                            | 838.8 | 13.2  | 1.6     | -                                                      | -    | -    | -       |
| 1032             | 838              | V   | L9119a  |      | -            | 433.15       | 333.57     | 0.01         | 758.1                                            | 797.1 | 39.0  | 5.2     | -                                                      | -    | -    | -       |
| 1033             | 839              | V   | L9120a  |      | -            | 466.00       | 288.15     | 1.0          | 835.3                                            | 854.9 | 19.6  | 2.3     | -                                                      | -    | -    | -       |
| 1034             | 840              | V   | L9121a  |      | -            | 442.00       | 293.15     | 1.0          | 825.0                                            | 827.4 | 2.4   | 0.3     | -                                                      | -    | -    | -       |
| 1035             | 841              | V   | L9122a  |      | -            | 466.00       | 359.85     | 0.01         | 778.5                                            | 769.8 | -8.6  | -1.1    | -                                                      | -    | -    | -       |
| 1036             | 842              | V   | L9124a  |      | -            | 452.00       | 288.15     | 1.0          | 861.0                                            | 864.6 | 3.6   | 0.4     | -                                                      | -    | -    | -       |
| 1037             | 843              | V   | L9125a  |      | -            | 457.25       | 298.15     | 1.0          | 844.5                                            | 844.8 | 0.3   | 0.0     | -                                                      | -    | -    | -       |
| 1038             | 844              | V   | L9128a  |      | -            | 452.00       | 298.15     | 1.0          | 899.4                                            | 847.6 | -51.8 | -5.8    | -                                                      | -    | -    | -       |
| 1039             | 845              | V   | L9129a  |      | -            | 447.15       | 294.15     | 1.0          | 838.3                                            | 837.8 | -0.5  | -0.1    | -                                                      | -    | -    | -       |
| 1040             | 846              | V   | L9130a  |      | -            | 475.15       | 293.15     | 1.0          | 846.0                                            | 851.3 | 5.3   | 0.6     | -                                                      | -    | -    | -       |
| 1041             | 847              | V   | L9131a  |      | -            | 451.00       | 298.15     | 1.0          | 823.7                                            | 826.7 | 3.0   | 0.4     | -                                                      | -    | -    | -       |
| 1042             | 848              | V   | L9132a  |      | -            | 451.15       | 298.15     | 1.0          | 833.4                                            | 837.7 | 4.3   | 0.5     | -                                                      | -    | -    | -       |
| 1043             | 849              | V   | L9133a  |      | -            | 461.15       | 298.15     | 1.0          | 837.0                                            | 846.5 | 9.5   | 1.1     | -                                                      | -    | -    | -       |
| 1044             | 850              | V   | L9134a  |      | -            | 445.15       | 295.15     | 1.0          | 839.6                                            | 840.5 | 0.9   | 0.1     | -                                                      | -    | -    | -       |
| 1045             | 851              | V   | L9136a  |      | -            | 450.00       | 298.15     | 1.0          | 821.8                                            | 827.4 | 5.6   | 0.7     | -                                                      | -    | -    | -       |
| 1046             | 852              | V   | L9137a  |      | -            | 444.55       | 293.15     | 1.0          | 824.2                                            | 824.1 | -0.1  | -0.0    | -                                                      | -    | -    | -       |
| 1047             | 853              | V   | L9138a  |      | -            | 446.15       | 289.15     | 1.0          | 828.5                                            | 822.3 | -6.2  | -0.8    | -                                                      | -    | -    | -       |
| 1048             | 854              | V   | L9139a  |      | -            | 466.15       | 298.15     | 1.0          | 823.6                                            | 833.7 | 10.1  | 1.2     | 67.9                                                   | 69.5 | 1.6  | 2.4     |
| 1049             | 855              | V   | L9141a  |      | -            | 455.00       | 298.15     | 1.0          | 828.0                                            | 818.3 | -9.7  | -1.2    | -                                                      | -    | -    | -       |
| 1050             | 856              | V   | L9142a  |      | -            | -            | 295.15     | 1.0          | 830.0                                            | 810.8 | -19.2 | -2.3    | -                                                      | -    | -    | -       |
| 1051             | 857              | V   | L9143a  |      | -            | 444.15       | 293.15     | 1.0          | 818.6                                            | 804.1 | -14.5 | -1.8    | -                                                      | -    | -    | -       |
| 1052             | 858              | V   | L9144a  |      | -            | 452.00       | 293.15     | 1.0          | 827.5                                            | 838.6 | 11.1  | 1.3     | -                                                      | -    | -    | -       |
| 1053             | 859              | V   | L9145a  |      | -            | 460.15       | 293.15     | 1.0          | 859.2                                            | 836.9 | -22.3 | -2.6    | -                                                      | -    | -    | -       |
| 1054             | 860              | V   | L9147a  |      | -            | 448.15       | 293.15     | 1.0          | 814.8                                            | 805.8 | -9.0  | -1.1    | -                                                      | -    | -    | -       |

Table S.7 – Comparison of experimental and simulated properties (continued)

| $n_{\text{sim}}$ | $n_{\text{iso}}$ | Set | Outlier | code | $T_m$<br>[K] | $T_b$<br>[K] | $T$<br>[K] | $P$<br>[bar] | $\rho_{\text{liq}}[\text{kg}\cdot\text{m}^{-3}]$ |       |       |         | $\Delta H_{\text{vap}}[\text{kJ}\cdot\text{mol}^{-1}]$ |      |      |         |
|------------------|------------------|-----|---------|------|--------------|--------------|------------|--------------|--------------------------------------------------|-------|-------|---------|--------------------------------------------------------|------|------|---------|
|                  |                  |     |         |      |              |              |            |              | exp                                              | sim   | dev   | err [%] | exp                                                    | sim  | dev  | err [%] |
| 1055             | 861              | V   | L9148a  |      | -            | 467.15       | 273.15     | 1.0          | 878.7                                            | 826.4 | -52.3 | -6.0    | -                                                      | -    | -    | -       |
| 1056             | 862              | V   | L9149a  |      | -            | 451.00       | 298.15     | 1.0          | 806.4                                            | 804.2 | -2.2  | -0.3    | 65.2                                                   | 70.9 | 5.7  | 8.7     |
| 1057             | 863              | V   | L9150a  |      | -            | 452.15       | 298.15     | 1.0          | 829.9                                            | 833.9 | 4.0   | 0.5     | -                                                      | -    | -    | -       |
| 1058             | 864              | V   | L9151a  |      | -            | 455.35       | 298.15     | 1.0          | 829.9                                            | 831.8 | 1.9   | 0.2     | -                                                      | -    | -    | -       |
| 1059             | 865              | V   | L9153a  |      | -            | 454.15       | 298.15     | 1.0          | 824.6                                            | 821.7 | -2.9  | -0.3    | -                                                      | -    | -    | -       |
| 1060             | 866              | V   | L9154a  |      | -            | -            | 298.15     | 1.0          | 827.5                                            | 820.5 | -7.0  | -0.8    | -                                                      | -    | -    | -       |
| 1061             | 866              | V   | L9154b  |      | -            | -            | 368.0      | 1.0          | -                                                | -     | -     | -       | 53.2                                                   | 58.7 | 5.5  | 10.3    |
| 1062             | 867              | V   | L9155a  |      | -            | 455.00       | 293.15     | 1.0          | 843.9                                            | 826.6 | -17.3 | -2.0    | -                                                      | -    | -    | -       |
| 1063             | 868              | V   | L9156a  |      | -            | 451.15       | 298.15     | 1.0          | 813.4                                            | 805.2 | -8.2  | -1.0    | -                                                      | -    | -    | -       |
| 1064             | 868              | V   | L9156b  |      | -            | 451.15       | 353.0      | 1.0          | -                                                | -     | -     | -       | 64.6                                                   | 62.0 | -2.6 | -4.0    |
| 1065             | 869              | V   | L9157a  |      | -            | 466.15       | 298.15     | 1.0          | 835.8                                            | 839.3 | 3.5   | 0.4     | -                                                      | -    | -    | -       |
| 1066             | 870              | V   | L9159a  |      | -            | 455.00       | 298.15     | 1.0          | 815.6                                            | 818.7 | 3.1   | 0.4     | -                                                      | -    | -    | -       |
| 1067             | 871              | V   | L9160a  |      | -            | 459.00       | 298.15     | 1.0          | 843.7                                            | 816.5 | -27.2 | -3.2    | -                                                      | -    | -    | -       |
| 1068             | 872              | V   | L9161a  |      | -            | 453.15       | 291.15     | 1.0          | 834.0                                            | 821.2 | -12.8 | -1.5    | -                                                      | -    | -    | -       |
| 1069             | 873              | V   | L9162a  |      | -            | 454.00       | 300.15     | 1.0          | 831.0                                            | 808.5 | -22.5 | -2.7    | -                                                      | -    | -    | -       |
| 1070             | 874              | V   | L9163a  |      | -            | 457.15       | 293.15     | 1.0          | 827.0                                            | 811.3 | -15.7 | -1.9    | -                                                      | -    | -    | -       |
| 1071             | 874              | V   | L9163b  |      | -            | 457.15       | 403.0      | 1.0          | -                                                | -     | -     | -       | 49.5                                                   | 53.8 | 4.3  | 8.8     |
| 1072             | 875              | V   | L9164a  |      | -            | 468.15       | 293.15     | 1.0          | 828.8                                            | 833.9 | 5.1   | 0.6     | -                                                      | -    | -    | -       |
| 1073             | 876              | V   | L9165a  |      | -            | 465.15       | 293.15     | 1.0          | 825.6                                            | 826.4 | 0.8   | 0.1     | -                                                      | -    | -    | -       |
| 1074             | 877              | V   | L9166a  |      | -            | 466.00       | 298.15     | 1.0          | 820.8                                            | 816.8 | -4.0  | -0.5    | -                                                      | -    | -    | -       |
| 1075             | 878              | V   | L9167a  |      | -            | 455.00       | 296.15     | 1.0          | 822.0                                            | 813.2 | -8.8  | -1.1    | -                                                      | -    | -    | -       |
| 1076             | 879              | V   | L9169a  |      | -            | 459.00       | 301.15     | 1.0          | 832.0                                            | 804.6 | -27.4 | -3.3    | -                                                      | -    | -    | -       |
| 1077             | 880              | V   | L9170a  |      | -            | -            | 300.15     | 1.0          | 823.0                                            | 814.5 | -8.5  | -1.0    | -                                                      | -    | -    | -       |
| 1078             | 881              | V   | L9171a  |      | -            | 454.00       | 298.15     | 1.0          | 821.0                                            | 803.0 | -18.0 | -2.2    | -                                                      | -    | -    | -       |
| 1079             | 882              | V   | L9172a  |      | -            | 457.15       | 298.15     | 1.0          | 815.0                                            | 803.4 | -11.6 | -1.4    | -                                                      | -    | -    | -       |
| 1080             | 883              | V   | L9173a  |      | -            | 455.00       | 293.15     | 1.0          | 813.6                                            | 802.8 | -10.8 | -1.3    | -                                                      | -    | -    | -       |
| 1081             | 884              | V   | L9174a  |      | -            | 459.00       | 285.15     | 1.0          | 840.2                                            | 807.8 | -32.4 | -3.9    | -                                                      | -    | -    | -       |
| 1082             | 885              | V   | L9177a  |      | -            | 480.15       | 296.15     | 1.0          | 834.0                                            | 829.8 | -4.2  | -0.5    | -                                                      | -    | -    | -       |
| 1083             | 886              | V   | L9179a  |      | -            | 472.00       | 298.15     | 1.0          | 848.0                                            | 829.0 | -19.0 | -2.2    | -                                                      | -    | -    | -       |
| 1084             | 887              | V   | L9181a  |      | -            | 473.00       | 300.65     | 1.0          | 820.0                                            | 819.6 | -0.4  | -0.1    | -                                                      | -    | -    | -       |
| 1085             | 888              | V   | L9182a  |      | -            | 473.00       | 297.15     | 1.0          | 828.0                                            | 823.0 | -5.0  | -0.6    | -                                                      | -    | -    | -       |
| 1086             | 889              | V   | L9183a  |      | -            | 473.00       | 297.15     | 1.0          | 827.0                                            | 821.2 | -5.8  | -0.7    | -                                                      | -    | -    | -       |
| 1087             | 890              | V   | L9184a  |      | -            | 479.15       | 370.37     | 0.01         | 770.4                                            | 768.0 | -2.3  | -0.3    | -                                                      | -    | -    | -       |
| 1088             | 891              | V   | L9185a  |      | -            | 473.00       | 277.15     | 1.0          | 841.8                                            | 829.9 | -11.9 | -1.4    | -                                                      | -    | -    | -       |
| 1089             | 892              | V   | L9186a  |      | 278.75       | 468.25       | 298.15     | 1.0          | 818.3                                            | 804.3 | -14.0 | -1.7    | 71.4                                                   | 73.8 | 2.4  | 3.3     |
| 1090             | 893              | V   | L9187a  |      | -            | 466.15       | 293.15     | 1.0          | 826.3                                            | 807.2 | -19.1 | -2.3    | 71.5                                                   | 74.1 | 2.6  | 3.6     |
| 1091             | 894              | V   | L9188a  |      | -            | 467.85       | 298.15     | 1.0          | 823.5                                            | 803.7 | -19.8 | -2.4    | 70.9                                                   | 73.4 | 2.5  | 3.5     |
| 1092             | 895              | V   | L9189a  |      | -            | 479.15       | 298.15     | 1.0          | 826.0                                            | 813.5 | -12.5 | -1.5    | -                                                      | -    | -    | -       |
| 1093             | 896              | V   | L9190a  |      | -            | 471.65       | 298.15     | 1.0          | 819.4                                            | 798.6 | -20.7 | -2.5    | 72.9                                                   | 73.2 | 0.3  | 0.4     |
| 1094             | 897              | V   | L9191a  |      | 268.15       | 486.25       | 298.15     | 1.0          | 824.6                                            | 817.6 | -7.0  | -0.8    | 72.2                                                   | 75.6 | 3.4  | 4.8     |
| 1095             | 898              | V   | L0103a  |      | -            | 464.15       | 293.15     | 1.0          | 862.4                                            | 878.8 | 16.4  | 1.9     | -                                                      | -    | -    | -       |
| 1096             | 899              | V   | L0104a  |      | -            | 475.15       | 293.15     | 1.0          | 874.2                                            | 905.5 | 31.3  | 3.6     | -                                                      | -    | -    | -       |
| 1097             | 900              | V   | L0105a  |      | -            | 474.15       | 293.15     | 1.0          | 874.5                                            | 892.0 | 17.5  | 2.0     | -                                                      | -    | -    | -       |
| 1098             | 901              | V   | L0106a  |      | -            | 465.15       | 293.15     | 1.0          | 858.4                                            | 886.5 | 28.1  | 3.3     | -                                                      | -    | -    | -       |
| 1099             | 902              | V   | L0107a  |      | -            | 513.48       | 293.15     | 1.0          | 839.3                                            | 867.6 | 28.3  | 3.4     | -                                                      | -    | -    | -       |
| 1100             | 903              | V   | L0108a  |      | -            | 463.15       | 293.15     | 1.0          | 854.9                                            | 877.9 | 23.0  | 2.7     | -                                                      | -    | -    | -       |
| 1101             | 904              | V   | L0111a  |      | -            | 468.15       | 293.15     | 1.0          | 862.3                                            | 883.8 | 21.5  | 2.5     | -                                                      | -    | -    | -       |
| 1102             | 905              | V   | L0112a  |      | -            | 475.00       | 293.15     | 1.0          | 837.8                                            | 849.8 | 12.0  | 1.4     | -                                                      | -    | -    | -       |

Table S.7 – Comparison of experimental and simulated properties (continued)

| $n_{\text{sim}}$ | $n_{\text{iso}}$ | Set | Outlier | code | $T_m$<br>[K] | $T_b$<br>[K] | $T$<br>[K] | $P$<br>[bar] | $\rho_{\text{liq}}[\text{kg}\cdot\text{m}^{-3}]$ |       |       |         | $\Delta H_{\text{vap}}[\text{kJ}\cdot\text{mol}^{-1}]$ |      |      |         |
|------------------|------------------|-----|---------|------|--------------|--------------|------------|--------------|--------------------------------------------------|-------|-------|---------|--------------------------------------------------------|------|------|---------|
|                  |                  |     |         |      |              |              |            |              | exp                                              | sim   | dev   | err [%] | exp                                                    | sim  | dev  | err [%] |
| 1103             | 906              | V   | L0115a  |      | -            | 467.65       | 298.15     | 1.0          | 859.1                                            | 864.5 | 5.4   | 0.6     | -                                                      | -    | -    | -       |
| 1104             | 907              | V   | L0117a  |      | -            | 459.15       | 293.15     | 1.0          | 848.7                                            | 857.3 | 8.6   | 1.0     | -                                                      | -    | -    | -       |
| 1105             | 908              | V   | L0118a  |      | -            | 460.00       | 293.15     | 1.0          | 842.8                                            | 850.5 | 7.7   | 0.9     | -                                                      | -    | -    | -       |
| 1106             | 909              | V   | L0119a  |      | -            | 468.75       | 293.15     | 1.0          | 854.3                                            | 850.6 | -3.6  | -0.4    | -                                                      | -    | -    | -       |
| 1107             | 910              | V   | L011aa  |      | -            | 490.15       | 293.15     | 1.0          | 825.2                                            | 805.8 | -19.4 | -2.4    | -                                                      | -    | -    | -       |
| 1108             | 911              | V   | L011ba  |      | 280.15       | 503.35       | 298.15     | 1.0          | 826.5                                            | 819.9 | -6.7  | -0.8    | 80.9                                                   | 80.6 | -0.3 | -0.3    |
| 1109             | 912              | V   | L0120a  |      | -            | 454.15       | 293.15     | 1.0          | 833.0                                            | 837.6 | 4.6   | 0.6     | -                                                      | -    | -    | -       |
| 1110             | 913              | V   | L0121a  |      | -            | 465.15       | 293.15     | 1.0          | 853.7                                            | 860.4 | 6.7   | 0.8     | -                                                      | -    | -    | -       |
| 1111             | 914              | V   | L0122a  |      | -            | 460.00       | 293.15     | 1.0          | 860.6                                            | 868.7 | 8.1   | 0.9     | -                                                      | -    | -    | -       |
| 1112             | 915              | V   | L0124a  |      | -            | 463.00       | 293.15     | 1.0          | 839.8                                            | 832.0 | -7.8  | -0.9    | -                                                      | -    | -    | -       |
| 1113             | 916              | V   | L0126a  |      | -            | 460.15       | 293.15     | 1.0          | 833.9                                            | 858.0 | 24.1  | 2.9     | -                                                      | -    | -    | -       |
| 1114             | 917              | V   | L0127a  |      | -            | 463.00       | 293.15     | 1.0          | 823.6                                            | 825.9 | 2.3   | 0.3     | -                                                      | -    | -    | -       |
| 1115             | 918              | V   | L0128a  |      | -            | 455.15       | 294.15     | 1.0          | 823.0                                            | 829.6 | 6.7   | 0.8     | -                                                      | -    | -    | -       |
| 1116             | 919              | V   | L0129a  | x    | -            | 455.00       | 289.15     | 1.0          | 751.3                                            | 840.1 | 88.8  | 11.8    | -                                                      | -    | -    | -       |
| 1117             | 920              | V   | L0130a  |      | -            | 466.00       | 293.15     | 1.0          | 826.5                                            | 827.0 | 0.5   | 0.1     | -                                                      | -    | -    | -       |
| 1118             | 921              | V   | L0132a  |      | -            | 466.15       | 291.15     | 1.0          | 833.0                                            | 822.8 | -10.2 | -1.2    | -                                                      | -    | -    | -       |
| 1119             | 922              | V   | L0134a  |      | -            | 463.15       | 298.15     | 1.0          | 841.3                                            | 845.9 | 4.6   | 0.5     | -                                                      | -    | -    | -       |
| 1120             | 923              | V   | L0135a  |      | -            | 466.15       | 293.15     | 1.0          | 845.5                                            | 849.3 | 3.8   | 0.5     | -                                                      | -    | -    | -       |
| 1121             | 924              | V   | L0137a  |      | -            | 462.25       | 298.15     | 1.0          | 824.9                                            | 833.3 | 8.4   | 1.0     | -                                                      | -    | -    | -       |
| 1122             | 925              | V   | L0139a  |      | -            | 464.00       | 301.15     | 1.0          | 825.8                                            | 826.9 | 1.1   | 0.1     | -                                                      | -    | -    | -       |
| 1123             | 926              | V   | L0140a  |      | -            | 466.00       | 298.15     | 1.0          | 837.0                                            | 829.2 | -7.8  | -0.9    | -                                                      | -    | -    | -       |
| 1124             | 927              | V   | L0141a  |      | -            | 464.00       | 293.15     | 1.0          | 823.2                                            | 825.8 | 2.6   | 0.3     | -                                                      | -    | -    | -       |
| 1125             | 928              | V   | L0142a  |      | 205.65       | 465.15       | 295.15     | 1.0          | 834.7                                            | 827.2 | -7.5  | -0.9    | -                                                      | -    | -    | -       |
| 1126             | 929              | V   | L0143a  |      | -            | 465.15       | 273.15     | 1.0          | 842.1                                            | 835.9 | -6.2  | -0.7    | -                                                      | -    | -    | -       |
| 1127             | 930              | V   | L0144a  |      | -            | 469.15       | 298.15     | 1.0          | 826.0                                            | 817.5 | -8.5  | -1.0    | -                                                      | -    | -    | -       |
| 1128             | 931              | V   | L0145a  |      | -            | 463.15       | 293.15     | 1.0          | 821.2                                            | 826.3 | 5.1   | 0.6     | -                                                      | -    | -    | -       |
| 1129             | 932              | V   | L0146a  |      | -            | 485.00       | 293.15     | 1.0          | 825.7                                            | 824.8 | -0.9  | -0.1    | -                                                      | -    | -    | -       |
| 1130             | 933              | V   | L0147a  |      | -            | 485.00       | 293.15     | 1.0          | 827.3                                            | 816.5 | -10.8 | -1.3    | -                                                      | -    | -    | -       |
| 1131             | 934              | V   | L0148a  |      | -            | 485.00       | 298.15     | 1.0          | 821.1                                            | 805.0 | -16.1 | -2.0    | -                                                      | -    | -    | -       |
| 1132             | 935              | V   | L0149a  |      | -            | 466.00       | 290.15     | 1.0          | 865.0                                            | 849.9 | -15.1 | -1.7    | -                                                      | -    | -    | -       |
| 1133             | 936              | V   | L0151a  |      | -            | 486.15       | 293.15     | 1.0          | 832.2                                            | 828.8 | -3.4  | -0.4    | -                                                      | -    | -    | -       |
| 1134             | 937              | V   | L0152a  |      | -            | 464.00       | 358.25     | 0.01         | 786.1                                            | 779.3 | -6.8  | -0.9    | -                                                      | -    | -    | -       |
| 1135             | 938              | V   | L0153a  |      | -            | 464.00       | 298.15     | 1.0          | 821.5                                            | 822.4 | 0.9   | 0.1     | -                                                      | -    | -    | -       |
| 1136             | 939              | V   | L0154a  |      | -            | 485.00       | 293.15     | 1.0          | 829.1                                            | 812.0 | -17.1 | -2.1    | -                                                      | -    | -    | -       |
| 1137             | 940              | V   | L0155a  |      | -            | 467.15       | 293.15     | 1.0          | 815.2                                            | 810.5 | -4.7  | -0.6    | -                                                      | -    | -    | -       |
| 1138             | 941              | V   | L0156a  |      | -            | 477.15       | 277.15     | 1.0          | 846.0                                            | 838.1 | -7.9  | -0.9    | -                                                      | -    | -    | -       |
| 1139             | 942              | V   | L0157a  |      | -            | 468.15       | 361.57     | 0.01         | 759.7                                            | 766.6 | 6.9   | 0.9     | -                                                      | -    | -    | -       |
| 1140             | 943              | V   | L0158a  |      | -            | 475.15       | 293.15     | 1.0          | 814.0                                            | 805.8 | -8.2  | -1.0    | -                                                      | -    | -    | -       |
| 1141             | 944              | V   | L0159a  |      | -            | 467.15       | 298.15     | 1.0          | 828.3                                            | 834.5 | 6.2   | 0.8     | -                                                      | -    | -    | -       |
| 1142             | 945              | V   | L0160a  |      | -            | 466.00       | 298.15     | 1.0          | 826.8                                            | 833.5 | 6.8   | 0.8     | -                                                      | -    | -    | -       |
| 1143             | 946              | V   | L0161a  |      | -            | 472.15       | 298.15     | 1.0          | 836.1                                            | 831.4 | -4.7  | -0.6    | -                                                      | -    | -    | -       |
| 1144             | 947              | V   | L0162a  |      | -            | 481.15       | 293.15     | 1.0          | 830.0                                            | 833.9 | 3.9   | 0.5     | -                                                      | -    | -    | -       |
| 1145             | 948              | V   | L0163a  |      | -            | 475.15       | 298.15     | 1.0          | 825.4                                            | 823.6 | -1.8  | -0.2    | -                                                      | -    | -    | -       |
| 1146             | 949              | V   | L0164a  |      | -            | 482.00       | 298.15     | 1.0          | 827.1                                            | 822.9 | -4.2  | -0.5    | -                                                      | -    | -    | -       |
| 1147             | 950              | V   | L0165a  |      | -            | 482.00       | 298.15     | 1.0          | 826.5                                            | 822.4 | -4.0  | -0.5    | -                                                      | -    | -    | -       |
| 1148             | 951              | V   | L0166a  |      | -            | 487.00       | 298.15     | 1.0          | 807.8                                            | 809.2 | 1.4   | 0.2     | -                                                      | -    | -    | -       |
| 1149             | 952              | V   | L0167a  |      | -            | 488.35       | 303.15     | 1.0          | 834.1                                            | 832.9 | -1.2  | -0.1    | -                                                      | -    | -    | -       |
| 1150             | 953              | V   | L0169a  |      | -            | 482.00       | 300.15     | 1.0          | 826.0                                            | 818.2 | -7.8  | -0.9    | -                                                      | -    | -    | -       |

Table S.7 – Comparison of experimental and simulated properties (continued)

| $n_{\text{sim}}$ | $n_{\text{iso}}$ | Set | Outlier | code | $T_m$<br>[K] | $T_b$<br>[K] | T<br>[K] | P<br>[bar] | $\rho_{\text{liq}}[\text{kg}\cdot\text{m}^{-3}]$ |       |       |         | $\Delta H_{\text{vap}}[\text{kJ}\cdot\text{mol}^{-1}]$ |      |       |         |
|------------------|------------------|-----|---------|------|--------------|--------------|----------|------------|--------------------------------------------------|-------|-------|---------|--------------------------------------------------------|------|-------|---------|
|                  |                  |     |         |      |              |              |          |            | exp                                              | sim   | dev   | err [%] | exp                                                    | sim  | dev   | err [%] |
| 1151             | 954              | V   | L0170a  |      | -            | 487.00       | 295.15   | 1.0        | 845.0                                            | 814.0 | -31.0 | -3.7    | -                                                      | -    | -     | -       |
| 1152             | 955              | V   | L0171a  |      | -            | 481.55       | 298.15   | 1.0        | 824.5                                            | 810.6 | -13.9 | -1.7    | -                                                      | -    | -     | -       |
| 1153             | 956              | V   | L0172a  |      | -            | 481.15       | 293.15   | 1.0        | 828.6                                            | 835.0 | 6.4   | 0.8     | -                                                      | -    | -     | -       |
| 1154             | 957              | V   | L0173a  |      | -            | 472.00       | 297.65   | 1.0        | 839.6                                            | 818.1 | -21.5 | -2.6    | -                                                      | -    | -     | -       |
| 1155             | 958              | V   | L0176a  |      | -            | 483.00       | 291.15   | 1.0        | 830.0                                            | 825.1 | -4.9  | -0.6    | -                                                      | -    | -     | -       |
| 1156             | 959              | V   | L0179a  |      | -            | 485.15       | 298.15   | 1.0        | 832.0                                            | 818.1 | -13.8 | -1.7    | -                                                      | -    | -     | -       |
| 1157             | 959              | V   | L0179b  | ×    | -            | 485.15       | 356.0    | 1.0        | -                                                | -     | -     | -       | 79.1                                                   | 68.9 | -10.2 | -12.9   |
| 1158             | 960              | V   | L0180a  |      | -            | -            | 288.15   | 1.0        | 830.3                                            | 820.4 | -9.9  | -1.2    | -                                                      | -    | -     | -       |
| 1159             | 961              | V   | L0182a  |      | -            | 487.00       | 293.15   | 1.0        | 833.2                                            | 810.7 | -22.5 | -2.7    | -                                                      | -    | -     | -       |
| 1160             | 962              | V   | L0184a  |      | -            | 482.00       | 298.15   | 1.0        | 820.0                                            | 807.0 | -13.1 | -1.6    | -                                                      | -    | -     | -       |
| 1161             | 963              | V   | L0185a  |      | -            | 482.00       | 293.15   | 1.0        | 821.5                                            | 805.8 | -15.7 | -1.9    | -                                                      | -    | -     | -       |
| 1162             | 964              | V   | L0186a  |      | -            | 487.00       | 376.65   | 0.01       | 760.1                                            | 742.5 | -17.6 | -2.3    | -                                                      | -    | -     | -       |
| 1163             | 965              | V   | L0187a  |      | -            | 482.00       | 372.65   | 0.01       | 763.4                                            | 775.9 | 12.5  | 1.6     | -                                                      | -    | -     | -       |
| 1164             | 966              | V   | L0188a  |      | -            | -            | 289.15   | 1.0        | 836.0                                            | 830.1 | -5.9  | -0.7    | -                                                      | -    | -     | -       |
| 1165             | 967              | V   | L0189a  |      | -            | 491.05       | 293.15   | 1.0        | 832.2                                            | 827.2 | -5.0  | -0.6    | -                                                      | -    | -     | -       |
| 1166             | 968              | V   | L0191a  |      | -            | 487.00       | 297.15   | 1.0        | 831.0                                            | 824.4 | -6.6  | -0.8    | -                                                      | -    | -     | -       |
| 1167             | 969              | V   | L0192a  |      | -            | 489.15       | 300.15   | 1.0        | 826.0                                            | 821.6 | -4.4  | -0.5    | -                                                      | -    | -     | -       |
| 1168             | 970              | V   | L0193a  |      | -            | 487.00       | 296.15   | 1.0        | 837.0                                            | 823.9 | -13.1 | -1.6    | -                                                      | -    | -     | -       |
| 1169             | 971              | V   | L0194a  |      | -            | 487.00       | 298.15   | 1.0        | 828.2                                            | 823.3 | -4.9  | -0.6    | -                                                      | -    | -     | -       |
| 1170             | 972              | V   | L0195a  |      | -            | 495.15       | 288.15   | 1.0        | 833.6                                            | 824.8 | -8.9  | -1.1    | -                                                      | -    | -     | -       |
| 1171             | 973              | V   | L0196a  |      | 281.85       | 474.15       | 298.15   | 1.0        | 820.6                                            | 807.4 | -13.2 | -1.6    | -                                                      | -    | -     | -       |
| 1172             | 974              | V   | L0197a  |      | 262.15       | 483.15       | 293.15   | 1.0        | 825.0                                            | 810.8 | -14.2 | -1.7    | -                                                      | -    | -     | -       |
| 1173             | 975              | V   | L0198a  |      | 265.65       | 483.00       | 298.15   | 1.0        | 822.9                                            | 807.7 | -15.2 | -1.9    | -                                                      | -    | -     | -       |
| 1174             | 976              | V   | L0199a  |      | -            | 493.00       | 381.45   | 0.01       | 771.1                                            | 755.3 | -15.8 | -2.0    | -                                                      | -    | -     | -       |
| 1175             | 977              | V   | L7201a  |      | -            | 525.85       | 293.15   | 1.0        | 961.3                                            | 967.7 | 6.4   | 0.7     | -                                                      | -    | -     | -       |
| 1176             | 978              | V   | L7202a  |      | -            | 470.00       | 293.15   | 1.0        | 920.6                                            | 880.5 | -40.0 | -4.3    | -                                                      | -    | -     | -       |
| 1177             | 979              | V   | L7204a  |      | -            | -            | 298.15   | 1.0        | 961.2                                            | 948.5 | -12.8 | -1.3    | -                                                      | -    | -     | -       |
| 1178             | 980              | V   | L7206a  |      | -            | 517.03       | 293.15   | 1.0        | 952.8                                            | 965.1 | 12.3  | 1.3     | -                                                      | -    | -     | -       |
| 1179             | 981              | V   | L7207a  |      | -            | 517.03       | 293.15   | 1.0        | 929.6                                            | 898.2 | -31.4 | -3.4    | -                                                      | -    | -     | -       |
| 1180             | 982              | V   | L7208a  |      | -            | 517.03       | 291.15   | 1.0        | 932.1                                            | 892.0 | -40.1 | -4.3    | -                                                      | -    | -     | -       |
| 1181             | 983              | V   | L7212a  |      | 334.45       | 507.15       | 334.45   | 1.0        | 949.0                                            | 951.7 | 2.7   | 0.3     | -                                                      | -    | -     | -       |
| 1182             | 984              | V   | L7217a  |      | -            | 494.25       | 295.15   | 1.0        | 967.0                                            | 935.4 | -31.6 | -3.3    | -                                                      | -    | -     | -       |
| 1183             | 985              | V   | L7220a  |      | -            | 508.21       | 293.15   | 1.0        | 967.2                                            | 960.2 | -7.0  | -0.7    | -                                                      | -    | -     | -       |
| 1184             | 986              | V   | L7221a  |      | -            | -            | 295.15   | 1.0        | 943.0                                            | 921.1 | -21.9 | -2.3    | -                                                      | -    | -     | -       |
| 1185             | 987              | V   | L7224a  |      | -            | 508.21       | 298.15   | 1.0        | 926.0                                            | 902.8 | -23.2 | -2.5    | -                                                      | -    | -     | -       |
| 1186             | 988              | V   | L7226a  |      | -            | 485.43       | 293.15   | 1.0        | 962.5                                            | 955.4 | -7.1  | -0.7    | -                                                      | -    | -     | -       |
| 1187             | 989              | V   | L7227a  |      | -            | 485.43       | 293.15   | 1.0        | 967.9                                            | 960.1 | -7.8  | -0.8    | -                                                      | -    | -     | -       |
| 1188             | 990              | V   | L7228a  |      | -            | -            | 298.15   | 1.0        | 946.1                                            | 940.7 | -5.4  | -0.6    | -                                                      | -    | -     | -       |
| 1189             | 991              | V   | L7230a  |      | -            | 515.15       | 298.15   | 1.0        | 950.4                                            | 932.3 | -18.1 | -1.9    | -                                                      | -    | -     | -       |
| 1190             | 992              | V   | L7232a  |      | -            | 489.79       | 293.15   | 1.0        | 970.5                                            | 935.4 | -35.1 | -3.6    | -                                                      | -    | -     | -       |
| 1191             | 993              | V   | L7234a  |      | -            | 485.43       | 298.15   | 1.0        | 962.0                                            | 927.7 | -34.3 | -3.6    | -                                                      | -    | -     | -       |
| 1192             | 994              | V   | L7235a  |      | 295.05       | 535.15       | 298.15   | 1.0        | 952.2                                            | 947.4 | -4.8  | -0.5    | 96.5                                                   | 97.7 | 1.1   | 1.2     |
| 1193             | 995              | V   | L8202a  |      | -            | -            | 293.35   | 1.0        | 922.9                                            | 890.7 | -32.2 | -3.5    | -                                                      | -    | -     | -       |
| 1194             | 996              | V   | L8203a  |      | 364.15       | 487.15       | 362.0    | 0.01       | 852.2                                            | 857.3 | 5.1   | 0.6     | -                                                      | -    | -     | -       |
| 1195             | 997              | V   | L8204a  |      | 328.35       | 508.15       | 391.21   | 0.01       | 865.1                                            | 872.4 | 7.3   | 0.8     | -                                                      | -    | -     | -       |
| 1196             | 997              | V   | L8204b  |      | 328.35       | 508.15       | 428.0    | 1.0        | -                                                | -     | -     | -       | 58.5                                                   | 61.7 | 3.2   | 5.5     |
| 1197             | 998              | V   | L8205a  |      | -            | -            | 298.15   | 1.0        | 928.5                                            | 928.3 | -0.2  | -0.0    | -                                                      | -    | -     | -       |
| 1198             | 999              | V   | L8206a  |      | -            | -            | 293.15   | 1.0        | 917.2                                            | 887.0 | -30.2 | -3.3    | -                                                      | -    | -     | -       |

Table S.7 – Comparison of experimental and simulated properties (continued)

| $n_{\text{sim}}$ | $n_{\text{iso}}$ | Set | Outlier | code | $T_m$<br>[K] | $T_b$<br>[K] | T<br>[K] | P<br>[bar] | $\rho_{\text{liq}}[\text{kg}\cdot\text{m}^{-3}]$ |        |       |         | $\Delta H_{\text{vap}}[\text{kJ}\cdot\text{mol}^{-1}]$ |       |       |         |
|------------------|------------------|-----|---------|------|--------------|--------------|----------|------------|--------------------------------------------------|--------|-------|---------|--------------------------------------------------------|-------|-------|---------|
|                  |                  |     |         |      |              |              |          |            | exp                                              | sim    | dev   | err [%] | exp                                                    | sim   | dev   | err [%] |
| 1199             | 1000             | V   | L8207a  |      | -            | -            | 298.15   | 1.0        | 929.0                                            | 913.5  | -15.6 | -1.7    | -                                                      | -     | -     | -       |
| 1200             | 1001             | V   | L8208a  |      | -            | 478.13       | 369.56   | 0.01       | 875.7                                            | 844.6  | -31.1 | -3.5    | -                                                      | -     | -     | -       |
| 1201             | 1002             | V   | L8209a  |      | -            | 535.15       | 415.17   | 0.01       | 845.0                                            | 856.0  | 11.1  | 1.3     | -                                                      | -     | -     | -       |
| 1202             | 1003             | V   | L8210a  |      | -            | -            | 292.15   | 1.0        | 970.4                                            | 950.0  | -20.4 | -2.1    | -                                                      | -     | -     | -       |
| 1203             | 1004             | V   | L8211a  |      | -            | -            | 298.15   | 1.0        | 959.0                                            | 925.2  | -33.8 | -3.5    | -                                                      | -     | -     | -       |
| 1204             | 1005             | V   | L8212a  |      | 233.15       | 517.15       | 295.15   | 1.0        | 932.5                                            | 931.2  | -1.2  | -0.1    | 79.5                                                   | 87.1  | 7.6   | 9.5     |
| 1205             | 1006             | V   | L8213a  |      | -            | 478.13       | 298.15   | 1.0        | 918.0                                            | 895.8  | -22.2 | -2.4    | -                                                      | -     | -     | -       |
| 1206             | 1007             | V   | L8215a  |      | -            | -            | 298.15   | 1.0        | 949.0                                            | 921.2  | -27.8 | -2.9    | -                                                      | -     | -     | -       |
| 1207             | 1008             | V   | L8217a  |      | -            | -            | 298.15   | 1.0        | 954.0                                            | 919.6  | -34.4 | -3.6    | -                                                      | -     | -     | -       |
| 1208             | 1009             | V   | L8219a  |      | -            | -            | 298.15   | 1.0        | 943.0                                            | 916.3  | -26.7 | -2.8    | -                                                      | -     | -     | -       |
| 1209             | 1010             | V   | L8220b  | ×    | 332.75       | 544.15       | 356.0    | 1.0        | -                                                | -      | -     | -       | 101.0                                                  | 92.2  | -8.8  | -8.7    |
| 1210             | 1011             | V   | L9201a  |      | -            | -            | 301.35   | 1.0        | 920.7                                            | 894.9  | -25.8 | -2.8    | -                                                      | -     | -     | -       |
| 1211             | 1012             | V   | L9202a  |      | -            | -            | 290.35   | 1.0        | 913.8                                            | 890.0  | -23.8 | -2.6    | -                                                      | -     | -     | -       |
| 1212             | 1013             | V   | L9203a  |      | -            | -            | 291.15   | 1.0        | 902.0                                            | 880.6  | -21.4 | -2.4    | -                                                      | -     | -     | -       |
| 1213             | 1014             | V   | L9204a  |      | -            | -            | 434.0    | 1.0        | -                                                | -      | -     | -       | 68.0                                                   | 72.7  | 4.7   | 6.9     |
| 1214             | 1015             | V   | L9205a  |      | 316.15       | 535.15       | 323.15   | 1.0        | 929.0                                            | 931.2  | 2.2   | 0.2     | -                                                      | -     | -     | -       |
| 1215             | 1015             | V   | L9205b  |      | 316.15       | 535.15       | 460.0    | 1.0        | -                                                | -      | -     | -       | 67.2                                                   | 66.4  | -0.8  | -1.1    |
| 1216             | 1016             | V   | L9206a  |      | -            | -            | 291.15   | 1.0        | 958.0                                            | 943.8  | -14.2 | -1.5    | -                                                      | -     | -     | -       |
| 1217             | 1017             | V   | L9207a  |      | -            | -            | 293.15   | 1.0        | 941.6                                            | 936.1  | -5.5  | -0.6    | -                                                      | -     | -     | -       |
| 1218             | 1018             | V   | L9208a  |      | -            | -            | 293.15   | 1.0        | 937.0                                            | 913.6  | -23.4 | -2.5    | -                                                      | -     | -     | -       |
| 1219             | 1019             | V   | L9209a  |      | -            | 571.15       | 293.15   | 1.0        | 929.5                                            | 912.7  | -16.8 | -1.8    | -                                                      | -     | -     | -       |
| 1220             | 1020             | V   | L9211a  |      | -            | -            | 298.15   | 1.0        | 944.0                                            | 911.6  | -32.4 | -3.4    | -                                                      | -     | -     | -       |
| 1221             | 1021             | V   | L9213b  |      | 319.55       | 558.15       | 323.0    | 1.0        | -                                                | -      | -     | -       | 110.0                                                  | 102.5 | -7.5  | -6.8    |
| 1222             | 1022             | V   | L0201a  |      | -            | -            | 288.15   | 1.0        | 910.2                                            | 890.6  | -19.6 | -2.2    | -                                                      | -     | -     | -       |
| 1223             | 1023             | V   | L0202a  |      | -            | 503.15       | 298.15   | 1.0        | 943.5                                            | 960.6  | 17.1  | 1.8     | -                                                      | -     | -     | -       |
| 1224             | 1023             | V   | L0202b  |      | -            | 503.15       | 389.57   | 0.01       | -                                                | -      | -     | -       | 55.0                                                   | 59.6  | 4.6   | 8.3     |
| 1225             | 1024             | V   | L0203a  |      | -            | -            | 285.15   | 1.0        | 911.8                                            | 892.5  | -19.3 | -2.1    | -                                                      | -     | -     | -       |
| 1226             | 1025             | V   | L0204a  | ×    | -            | -            | 353.0    | 1.0        | -                                                | -      | -     | -       | 63.4                                                   | 81.6  | 18.2  | 28.7    |
| 1227             | 1026             | V   | L0205a  |      | -            | -            | 293.15   | 1.0        | 916.5                                            | 899.1  | -17.4 | -1.9    | -                                                      | -     | -     | -       |
| 1228             | 1027             | V   | L0206a  |      | -            | 538.15       | 293.15   | 1.0        | 926.0                                            | 914.7  | -11.3 | -1.2    | -                                                      | -     | -     | -       |
| 1229             | 1028             | V   | L0207a  |      | -            | -            | 293.15   | 1.0        | 948.1                                            | 913.3  | -34.8 | -3.7    | -                                                      | -     | -     | -       |
| 1230             | 1029             | V   | L0208a  |      | -            | -            | 293.15   | 1.0        | 936.2                                            | 940.8  | 4.6   | 0.5     | -                                                      | -     | -     | -       |
| 1231             | 1030             | V   | L0209a  |      | -            | -            | 301.15   | 1.0        | 915.5                                            | 902.2  | -13.3 | -1.5    | -                                                      | -     | -     | -       |
| 1232             | 1031             | V   | L0210a  |      | -            | -            | 298.15   | 1.0        | 930.7                                            | 927.2  | -3.5  | -0.4    | -                                                      | -     | -     | -       |
| 1233             | 1032             | V   | L0213a  |      | 345.55       | 572.15       | 353.15   | 1.0        | 883.0                                            | 879.8  | -3.2  | -0.4    | -                                                      | -     | -     | -       |
| 1234             | 1032             | V   | L0213b  | ×    | 345.55       | 572.15       | 364.0    | 1.0        | -                                                | -      | -     | -       | 112.4                                                  | 98.8  | -13.6 | -12.1   |
| 1235             | 1033             | V   | L7302a  |      | -            | 416.90       | 291.0    | 1.0        | 1075.0                                           | 1066.8 | -8.2  | -0.8    | -                                                      | -     | -     | -       |
| 1236             | 1034             | V   | C7202a  |      | -            | -            | 293.15   | 1.0        | 885.6                                            | 935.7  | 50.1  | 5.7     | -                                                      | -     | -     | -       |
| 1237             | 1035             | V   | C7203a  |      | -            | -            | 298.15   | 1.0        | 934.8                                            | 942.8  | 8.0   | 0.9     | -                                                      | -     | -     | -       |
| 1238             | 1036             | V   | C7205a  |      | -            | -            | 298.15   | 1.0        | 910.0                                            | 913.1  | 3.1   | 0.3     | -                                                      | -     | -     | -       |
| 1239             | 1037             | V   | C7206a  |      | -            | -            | 298.15   | 1.0        | 923.9                                            | 929.1  | 5.2   | 0.6     | -                                                      | -     | -     | -       |
| 1240             | 1038             | V   | C7207a  |      | -            | -            | 298.15   | 1.0        | 909.8                                            | 919.0  | 9.2   | 1.0     | -                                                      | -     | -     | -       |
| 1241             | 1039             | V   | C7208a  |      | -            | 482.65       | 298.15   | 1.0        | 909.0                                            | 911.9  | 2.9   | 0.3     | -                                                      | -     | -     | -       |
| 1242             | 1040             | V   | C7210a  |      | -            | 486.15       | 293.15   | 1.0        | 918.7                                            | 926.2  | 7.5   | 0.8     | -                                                      | -     | -     | -       |
| 1243             | 1041             | V   | C7211a  |      | -            | 489.15       | 293.15   | 1.0        | 916.3                                            | 918.1  | 1.8   | 0.2     | -                                                      | -     | -     | -       |
| 1244             | 1042             | V   | C7212a  |      | 265.98       | 496.15       | 298.15   | 1.0        | 913.5                                            | 918.3  | 4.8   | 0.5     | 72.9                                                   | 74.2  | 1.3   | 1.7     |
| 1245             | 1043             | V   | C8201a  |      | -            | -            | 298.15   | 1.0        | 919.9                                            | 947.8  | 27.9  | 3.0     | -                                                      | -     | -     | -       |
| 1246             | 1044             | V   | C8202a  |      | -            | -            | 293.15   | 1.0        | 929.0                                            | 934.7  | 5.7   | 0.6     | -                                                      | -     | -     | -       |

Table S.7 – Comparison of experimental and simulated properties (continued)

| $n_{\text{sim}}$ | $n_{\text{iso}}$ | Set | Outlier | code | $T_m$<br>[K] | $T_b$<br>[K] | T<br>[K] | P<br>[bar] | $\rho_{\text{liq}}[\text{kg}\cdot\text{m}^{-3}]$ |        |        |         | $\Delta H_{\text{vap}}[\text{kJ}\cdot\text{mol}^{-1}]$ |      |      |         |
|------------------|------------------|-----|---------|------|--------------|--------------|----------|------------|--------------------------------------------------|--------|--------|---------|--------------------------------------------------------|------|------|---------|
|                  |                  |     |         |      |              |              |          |            | exp                                              | sim    | dev    | err [%] | exp                                                    | sim  | dev  | err [%] |
| 1247             | 1045             | V   | C8203a  |      | -            | -            | 374.97   | 0.01       | 849.1                                            | 861.4  | 12.3   | 1.4     | -                                                      | -    | -    | -       |
| 1248             | 1046             | V   | C8204a  |      | -            | -            | 298.15   | 1.0        | 900.9                                            | 936.9  | 36.0   | 4.0     | -                                                      | -    | -    | -       |
| 1249             | 1047             | V   | C8206a  |      | -            | -            | 298.15   | 1.0        | 902.0                                            | 915.7  | 13.7   | 1.5     | -                                                      | -    | -    | -       |
| 1250             | 1048             | V   | C8207a  |      | -            | 494.15       | 298.15   | 1.0        | 904.0                                            | 912.0  | 8.0    | 0.9     | 74.8                                                   | 76.2 | 1.4  | 1.9     |
| 1251             | 1049             | V   | C8208a  |      | -            | 501.15       | 298.15   | 1.0        | 903.0                                            | 911.3  | 8.3    | 0.9     | 75.6                                                   | 76.7 | 1.1  | 1.5     |
| 1252             | 1050             | V   | C8212a  |      | -            | -            | 293.15   | 1.0        | 910.5                                            | 918.7  | 8.2    | 0.9     | -                                                      | -    | -    | -       |
| 1253             | 1051             | V   | C8214a  |      | 289.66       | 513.05       | 298.15   | 1.01       | 906.0                                            | 910.0  | 3.9    | 0.4     | 81.2                                                   | 79.4 | -1.8 | -2.2    |
| 1254             | 1052             | V   | C9201a  |      | -            | 456.91       | 385.37   | 0.01       | 839.7                                            | 856.4  | 16.7   | 2.0     | -                                                      | -    | -    | -       |
| 1255             | 1053             | V   | C9202a  |      | -            | 456.91       | 385.37   | 0.01       | 849.7                                            | 877.9  | 28.3   | 3.3     | -                                                      | -    | -    | -       |
| 1256             | 1054             | V   | C9203a  |      | -            | -            | 298.15   | 1.0        | 910.2                                            | 926.4  | 16.2   | 1.8     | -                                                      | -    | -    | -       |
| 1257             | 1055             | V   | C9207a  |      | -            | 456.91       | 298.15   | 1.0        | 893.5                                            | 903.9  | 10.3   | 1.2     | -                                                      | -    | -    | -       |
| 1258             | 1055             | V   | C9207b  |      | -            | 456.91       | 401.0    | 1.0        | -                                                | -      | -      | -       | 63.4                                                   | 70.9 | 7.5  | 11.9    |
| 1259             | 1056             | V   | C9208a  |      | -            | 456.91       | 277.15   | 1.0        | 909.7                                            | 914.7  | 5.0    | 0.6     | -                                                      | -    | -    | -       |
| 1260             | 1057             | V   | C9210a  |      | -            | 456.91       | 296.15   | 1.0        | 899.0                                            | 907.1  | 8.1    | 0.9     | -                                                      | -    | -    | -       |
| 1261             | 1058             | V   | C9211a  |      | -            | -            | 395.77   | 0.01       | 830.9                                            | 838.1  | 7.2    | 0.9     | -                                                      | -    | -    | -       |
| 1262             | 1059             | V   | C9214a  |      | 285.53       | 528.75       | 298.15   | 1.0        | 901.6                                            | 903.9  | 2.3    | 0.2     | -                                                      | -    | -    | -       |
| 1263             | 1059             | V   | C9214b  |      | 285.53       | 528.75       | 304.0    | 1.0        | -                                                | -      | -      | -       | 85.3                                                   | 84.0 | -1.3 | -1.5    |
| 1264             | 1060             | V   | C0201a  |      | -            | 473.73       | 293.15   | 1.0        | 902.2                                            | 910.9  | 8.7    | 1.0     | -                                                      | -    | -    | -       |
| 1265             | 1061             | V   | C0202a  |      | -            | -            | 298.15   | 1.0        | 912.9                                            | 918.6  | 5.7    | 0.6     | -                                                      | -    | -    | -       |
| 1266             | 1062             | V   | C0203a  |      | -            | -            | 291.15   | 1.0        | 897.0                                            | 901.7  | 4.7    | 0.5     | -                                                      | -    | -    | -       |
| 1267             | 1063             | V   | C0204a  |      | -            | -            | 291.55   | 1.0        | 897.8                                            | 903.2  | 5.4    | 0.6     | -                                                      | -    | -    | -       |
| 1268             | 1064             | V   | C0206a  |      | -            | -            | 293.15   | 1.0        | 848.1                                            | 902.2  | 54.1   | 6.4     | -                                                      | -    | -    | -       |
| 1269             | 1065             | V   | C0207a  |      | -            | -            | 298.15   | 1.0        | 893.0                                            | 894.1  | 1.1    | 0.1     | -                                                      | -    | -    | -       |
| 1270             | 1066             | V   | C0208a  |      | -            | 473.73       | 293.15   | 1.0        | 898.3                                            | 904.3  | 6.0    | 0.7     | -                                                      | -    | -    | -       |
| 1271             | 1067             | V   | C0209a  |      | -            | -            | 293.15   | 1.0        | 908.6                                            | 914.0  | 5.4    | 0.6     | -                                                      | -    | -    | -       |
| 1272             | 1068             | V   | C0212a  |      | 304.54       | 543.15       | 313.15   | 1.0        | 881.7                                            | 888.2  | 6.5    | 0.7     | 88.6                                                   | 88.0 | -0.6 | -0.7    |
| 1273             | 1069             | V   | C7403a  | ×    | 376.65       | 464.16       | 479.85   | 0.01       | 1198.8                                           | 1029.9 | -168.8 | -14.1   | -                                                      | -    | -    | -       |
| 1274             | 1070             | V   | C7409a  | ×    | 377.55       | 464.16       | 486.25   | 0.01       | 1100.1                                           | 996.4  | -103.7 | -9.4    | -                                                      | -    | -    | -       |
| 1275             | 1070             | V   | C7409b  |      | 377.55       | 464.16       | 451.0    | 1.0        | -                                                | -      | -      | -       | 88.6                                                   | 91.6 | 3.0  | 3.4     |
| 1276             | 1071             | V   | C8401a  |      | -            | 495.09       | 480.65   | 0.01       | 1089.8                                           | 1047.6 | -42.2  | -3.9    | -                                                      | -    | -    | -       |
| 1277             | 1072             | V   | C8403b  |      | 415.45       | 495.09       | 460.0    | 1.0        | -                                                | -      | -      | -       | 91.4                                                   | 94.2 | 2.8  | 3.1     |
| 1278             | 1073             | V   | C9401a  |      | 379.65       | 633.36       | 501.5    | 0.01       | 999.7                                            | 935.5  | -64.2  | -6.4    | -                                                      | -    | -    | -       |
| 1279             | 1073             | V   | C9401b  |      | 379.65       | 633.36       | 466.0    | 1.0        | -                                                | -      | -      | -       | 89.3                                                   | 97.0 | 7.7  | 8.6     |
| 1280             | 1074             | V   | C0403a  | ×    | 404.15       | 642.09       | 507.79   | 0.01       | 1026.1                                           | 913.1  | -113.0 | -11.0   | -                                                      | -    | -    | -       |
| 1281             | 1074             | V   | C0403b  | ×    | 404.15       | 642.09       | 471.0    | 1.0        | -                                                | -      | -      | -       | 85.9                                                   | 99.5 | 13.7 | 15.9    |
| 1282             | 1075             | V   | M7101a  |      | -            | -            | 298.15   | 1.0        | 761.5                                            | 775.6  | 14.1   | 1.9     | -                                                      | -    | -    | -       |
| 1283             | 1076             | V   | M7102a  |      | -            | 395.15       | 298.15   | 0.01       | 768.2                                            | 743.1  | -25.1  | -3.3    | -                                                      | -    | -    | -       |
| 1284             | 1077             | V   | M7103a  |      | -            | -            | 293.15   | 1.0        | 788.2                                            | 771.9  | -16.3  | -2.1    | -                                                      | -    | -    | -       |
| 1285             | 1078             | V   | M7104a  |      | -            | 405.65       | 306.57   | 0.01       | 755.5                                            | 753.6  | -1.8   | -0.2    | -                                                      | -    | -    | -       |
| 1286             | 1079             | V   | M7106a  |      | -            | 412.65       | 312.17   | 0.01       | 752.7                                            | 745.2  | -7.5   | -1.0    | -                                                      | -    | -    | -       |
| 1287             | 1080             | V   | M7107a  |      | -            | 414.15       | 313.37   | 0.01       | -                                                | -      | -      | -       | 41.8                                                   | 43.1 | 1.4  | 3.2     |
| 1288             | 1081             | V   | M7108a  |      | -            | 422.15       | 319.77   | 0.01       | 756.1                                            | 757.5  | 1.4    | 0.2     | -                                                      | -    | -    | -       |
| 1289             | 1082             | V   | M7109a  |      | -            | 426.15       | 322.97   | 0.01       | 757.4                                            | 752.3  | -5.0   | -0.7    | -                                                      | -    | -    | -       |
| 1290             | 1083             | V   | M7110a  |      | -            | 415.15       | 293.15   | 1.0        | 762.9                                            | 757.2  | -5.7   | -0.8    | -                                                      | -    | -    | -       |
| 1291             | 1084             | V   | M7111a  |      | 250.15       | 430.05       | 298.15   | 1.0        | 771.3                                            | 772.2  | 0.9    | 0.1     | 49.9                                                   | 49.4 | -0.5 | -0.9    |
| 1292             | 1085             | V   | M8101a  |      | -            | 413.15       | 312.57   | 0.01       | 794.4                                            | 749.8  | -44.6  | -5.6    | 41.0                                                   | 36.8 | -4.2 | -10.3   |
| 1293             | 1086             | V   | M8102a  |      | -            | 428.15       | 298.15   | 0.002      | 767.0                                            | 756.3  | -10.7  | -1.4    | 44.5                                                   | 48.2 | 3.7  | 8.4     |
| 1294             | 1087             | V   | M8103a  |      | -            | 442.35       | 335.93   | 0.01       | -                                                | -      | -      | -       | 45.3                                                   | 46.7 | 1.4  | 3.2     |

Table S.7 – Comparison of experimental and simulated properties (continued)

| $n_{\text{sim}}$ | $n_{\text{iso}}$ | Set | Outlier | code | $T_m$<br>[K] | $T_b$<br>[K] | T<br>[K] | P<br>[bar] | $\rho_{\text{liq}}[\text{kg}\cdot\text{m}^{-3}]$ |       |       |         | $\Delta H_{\text{vap}}[\text{kJ}\cdot\text{mol}^{-1}]$ |      |      |         |
|------------------|------------------|-----|---------|------|--------------|--------------|----------|------------|--------------------------------------------------|-------|-------|---------|--------------------------------------------------------|------|------|---------|
|                  |                  |     |         |      |              |              |          |            | exp                                              | sim   | dev   | err [%] | exp                                                    | sim  | dev  | err [%] |
| 1295             | 1088             | V   | M8104a  |      | -            | 438.15       | 293.15   | 1.0        | 772.0                                            | 766.2 | -5.8  | -0.8    | -                                                      | -    | -    | -       |
| 1296             | 1088             | V   | M8104b  |      | -            | 438.15       | 332.57   | 0.01       | -                                                | -     | -     | -       | 44.7                                                   | 46.0 | 1.3  | 2.9     |
| 1297             | 1089             | V   | M8105a  |      | 273.15       | 452.75       | 298.15   | 1.01       | 780.0                                            | 779.0 | -0.9  | -0.1    | 55.1                                                   | 54.1 | -1.0 | -1.8    |
| 1298             | 1090             | V   | M9101a  |      | -            | -            | 293.15   | 1.0        | 771.9                                            | 774.5 | 2.6   | 0.3     | -                                                      | -    | -    | -       |
| 1299             | 1091             | V   | M9102a  |      | -            | -            | 298.15   | 1.0        | 789.2                                            | 791.9 | 2.7   | 0.3     | -                                                      | -    | -    | -       |
| 1300             | 1092             | V   | M9103a  |      | 272.15       | 475.35       | 293.15   | 1.0        | 788.6                                            | 789.2 | 0.6   | 0.1     | -                                                      | -    | -    | -       |
| 1301             | 1092             | V   | M9103b  |      | 272.15       | 475.35       | 362.33   | 0.01       | -                                                | -     | -     | -       | 49.5                                                   | 50.7 | 1.3  | 2.5     |
| 1302             | 1093             | V   | M0101a  |      | 288.15       | 493.65       | 298.15   | 1.0        | 789.0                                            | 790.0 | 1.0   | 0.1     | 64.9                                                   | 63.8 | -1.1 | -1.8    |
| 1303             | 1094             | V   | N7101a  |      | -            | 371.15       | 298.15   | 0.03       | 726.9                                            | 760.0 | 33.1  | 4.5     | -                                                      | -    | -    | -       |
| 1304             | 1094             | V   | N7101b  |      | -            | 371.15       | 287.0    | 1.0        | -                                                | -     | -     | -       | 35.7                                                   | 36.9 | 1.2  | 3.3     |
| 1305             | 1095             | V   | N7102a  |      | -            | -            | 298.0    | 1.0        | -                                                | -     | -     | -       | 42.1                                                   | 40.3 | -1.8 | -4.3    |
| 1306             | 1096             | V   | N7103a  |      | -            | 406.65       | 307.37   | 0.01       | 737.2                                            | 734.1 | -3.1  | -0.4    | -                                                      | -    | -    | -       |
| 1307             | 1097             | V   | N7104a  |      | -            | 407.15       | 307.77   | 0.01       | 739.6                                            | 738.0 | -1.6  | -0.2    | -                                                      | -    | -    | -       |
| 1308             | 1098             | V   | N7105a  |      | -            | 415.15       | 293.15   | 1.0        | 778.7                                            | 763.7 | -15.0 | -1.9    | -                                                      | -    | -    | -       |
| 1309             | 1098             | V   | N7105b  |      | -            | 415.15       | 314.17   | 0.01       | -                                                | -     | -     | -       | 43.0                                                   | 44.5 | 1.5  | 3.5     |
| 1310             | 1099             | V   | N8101a  |      | -            | 407.15       | 298.15   | 1.0        | 749.0                                            | 747.7 | -1.3  | -0.2    | 41.3                                                   | 43.0 | 1.7  | 4.1     |
| 1311             | 1100             | V   | N8102a  |      | 199.65       | 412.25       | 298.15   | 1.0        | 740.7                                            | 728.8 | -12.0 | -1.6    | -                                                      | -    | -    | -       |
| 1312             | 1100             | V   | N8102b  |      | 199.65       | 412.25       | 311.85   | 0.01       | -                                                | -     | -     | -       | 41.8                                                   | 41.0 | -0.8 | -1.9    |
| 1313             | 1101             | V   | N8104a  |      | -            | -            | 328.0    | 1.0        | -                                                | -     | -     | -       | 41.2                                                   | 42.8 | 1.6  | 3.9     |
| 1314             | 1102             | V   | N8105a  |      | 211.35       | 432.00       | 298.15   | 1.0        | 755.7                                            | 752.2 | -3.5  | -0.5    | 49.4                                                   | 47.9 | -1.5 | -3.0    |
| 1315             | 1103             | V   | N8106a  |      | -            | 431.15       | 326.97   | 0.01       | 735.3                                            | 732.5 | -2.8  | -0.4    | -                                                      | -    | -    | -       |
| 1316             | 1104             | V   | N8107a  |      | -            | 438.15       | 273.15   | 1.0        | 771.2                                            | 789.1 | 17.9  | 2.3     | -                                                      | -    | -    | -       |
| 1317             | 1105             | V   | N9101a  | x    | -            | 417.15       | 315.77   | 0.01       | 756.4                                            | 894.2 | 137.8 | 18.2    | -                                                      | -    | -    | -       |
| 1318             | 1106             | V   | N9102a  |      | -            | 453.85       | 298.15   | 1.0        | 767.5                                            | 764.1 | -3.4  | -0.4    | -                                                      | -    | -    | -       |
| 1319             | 1107             | V   | N9103a  |      | -            | 459.85       | 293.15   | 1.0        | 782.4                                            | 777.9 | -4.5  | -0.6    | -                                                      | -    | -    | -       |
| 1320             | 1107             | V   | N9103b  |      | -            | 459.85       | 380.0    | 1.0        | -                                                | -     | -     | -       | 49.2                                                   | 48.5 | -0.7 | -1.4    |
| 1321             | 1108             | V   | N0101a  |      | 229.15       | 461.15       | 298.15   | 1.0        | 766.9                                            | 759.7 | -7.2  | -0.9    | -                                                      | -    | -    | -       |
| 1322             | 1108             | V   | N0101b  |      | 229.15       | 461.15       | 350.97   | 0.01       | -                                                | -     | -     | -       | 48.0                                                   | 50.4 | 2.4  | 4.9     |
| 1323             | 1109             | V   | N0102a  |      | -            | 476.15       | 298.15   | 1.0        | 773.2                                            | 766.9 | -6.3  | -0.8    | 61.2                                                   | 57.8 | -3.4 | -5.6    |
| 1324             | 1110             | V   | N0103a  |      | -            | 475.15       | 298.15   | 1.0        | 774.3                                            | 770.9 | -3.4  | -0.4    | -                                                      | -    | -    | -       |
| 1325             | 1111             | V   | N0104a  |      | -            | 480.15       | 292.15   | 1.0        | 784.0                                            | 784.7 | 0.7   | 0.1     | -                                                      | -    | -    | -       |
| 1326             | 1112             | V   | R7101a  |      | -            | 391.15       | 298.15   | 0.02       | 732.1                                            | 786.2 | 54.1  | 7.4     | -                                                      | -    | -    | -       |
| 1327             | 1113             | V   | R7102a  |      | -            | 383.15       | 298.15   | 0.02       | 744.5                                            | 766.5 | 22.0  | 3.0     | 37.8                                                   | 38.8 | 1.0  | 2.7     |
| 1328             | 1114             | V   | R7103a  |      | -            | 390.50       | 298.15   | 0.02       | 732.2                                            | 764.0 | 31.8  | 4.3     | -                                                      | -    | -    | -       |
| 1329             | 1115             | V   | R7104a  |      | -            | 385.15       | 298.15   | 0.02       | 749.5                                            | 742.6 | -6.8  | -0.9    | -                                                      | -    | -    | -       |
| 1330             | 1116             | V   | R7105a  |      | -            | 390.50       | 298.15   | 0.02       | 732.1                                            | 771.5 | 39.4  | 5.4     | -                                                      | -    | -    | -       |
| 1331             | 1117             | V   | R7106a  |      | -            | 389.15       | 298.15   | 0.02       | 750.8                                            | 769.8 | 19.0  | 2.5     | 39.0                                                   | 42.3 | 3.3  | 8.6     |
| 1332             | 1118             | V   | R7107a  |      | -            | 376.15       | 298.15   | 0.03       | 715.4                                            | 758.2 | 42.9  | 6.0     | -                                                      | -    | -    | -       |
| 1333             | 1119             | V   | R7108a  |      | -            | 382.15       | 298.15   | 0.02       | 717.1                                            | 765.1 | 48.0  | 6.7     | -                                                      | -    | -    | -       |
| 1334             | 1120             | V   | R7109a  |      | -            | 381.65       | 298.15   | 0.03       | 739.0                                            | 752.0 | 13.0  | 1.8     | 37.5                                                   | 40.4 | 2.9  | 7.8     |
| 1335             | 1121             | V   | R7110a  |      | -            | 386.00       | 298.15   | 0.02       | 750.0                                            | 750.4 | 0.4   | 0.1     | -                                                      | -    | -    | -       |
| 1336             | 1122             | V   | R7111a  |      | -            | 388.00       | 298.15   | 0.02       | 752.1                                            | 766.5 | 14.4  | 1.9     | -                                                      | -    | -    | -       |
| 1337             | 1123             | V   | R7112a  |      | -            | 380.15       | 298.15   | 0.03       | 729.5                                            | 750.6 | 21.2  | 2.9     | -                                                      | -    | -    | -       |
| 1338             | 1124             | V   | R7113a  |      | -            | 386.65       | 298.15   | 0.02       | 752.0                                            | 760.3 | 8.4   | 1.1     | 38.4                                                   | 43.5 | 5.0  | 13.1    |
| 1339             | 1125             | V   | R7114a  |      | -            | 385.15       | 298.15   | 0.02       | 738.0                                            | 755.5 | 17.5  | 2.4     | 38.2                                                   | 42.4 | 4.2  | 11.0    |
| 1340             | 1126             | V   | R7115a  |      | -            | 387.25       | 298.15   | 0.02       | 750.1                                            | 757.0 | 6.9   | 0.9     | 38.4                                                   | 43.4 | 5.0  | 12.9    |
| 1341             | 1127             | V   | R7116a  |      | -            | 390.15       | 298.15   | 0.02       | 731.9                                            | 758.5 | 26.6  | 3.6     | 39.1                                                   | 43.7 | 4.7  | 11.9    |
| 1342             | 1128             | V   | R7117a  |      | -            | 395.15       | 298.15   | 0.01       | 731.8                                            | 764.8 | 33.0  | 4.5     | 40.0                                                   | 45.2 | 5.1  | 12.8    |



Table S.7 – Comparison of experimental and simulated properties (continued)

| $n_{\text{sim}}$ | $n_{\text{iso}}$ | Set | Outlier | code | $T_m$<br>[K] | $T_b$<br>[K] | T<br>[K] | P<br>[bar] | $\rho_{\text{liq}}[\text{kg}\cdot\text{m}^{-3}]$ |       |       |         | $\Delta H_{\text{vap}}[\text{kJ}\cdot\text{mol}^{-1}]$ |      |      |         |
|------------------|------------------|-----|---------|------|--------------|--------------|----------|------------|--------------------------------------------------|-------|-------|---------|--------------------------------------------------------|------|------|---------|
|                  |                  |     |         |      |              |              |          |            | exp                                              | sim   | dev   | err [%] | exp                                                    | sim  | dev  | err [%] |
| 1343             | 1129             | V   | R8101a  |      | -            | 400.15       | 302.17   | 0.01       | 763.8                                            | 769.2 | 5.4   | 0.7     | -                                                      | -    | -    | -       |
| 1344             | 1130             | V   | R8102a  |      | -            | 399.65       | 313.15   | 1.0        | 749.0                                            | 747.9 | -1.1  | -0.1    | -                                                      | -    | -    | -       |
| 1345             | 1130             | V   | R8102b  |      | -            | 399.65       | 301.77   | 0.01       | -                                                | -     | -     | -       | 40.0                                                   | 42.5 | 2.5  | 6.3     |
| 1346             | 1131             | V   | R8103a  |      | -            | 411.15       | 310.97   | 0.01       | 795.5                                            | 753.2 | -42.3 | -5.3    | 40.4                                                   | 45.9 | 5.5  | 13.7    |
| 1347             | 1132             | V   | R8104a  |      | -            | 409.15       | 293.15   | 1.0        | 742.0                                            | 768.0 | 26.0  | 3.5     | -                                                      | -    | -    | -       |
| 1348             | 1132             | V   | R8104b  |      | -            | 409.15       | 309.37   | 0.01       | -                                                | -     | -     | -       | 41.4                                                   | 46.4 | 5.0  | 12.0    |
| 1349             | 1133             | V   | R8105a  |      | -            | -            | 298.15   | 1.0        | 742.0                                            | 766.0 | 24.0  | 3.2     | -                                                      | -    | -    | -       |
| 1350             | 1134             | V   | R8106a  |      | -            | 418.15       | 316.57   | 0.01       | 729.5                                            | 759.6 | 30.1  | 4.1     | 43.4                                                   | 48.9 | 5.5  | 12.7    |
| 1351             | 1135             | V   | R9101a  |      | 172.65       | 429.65       | 298.15   | 1.0        | 752.9                                            | 769.6 | 16.8  | 2.2     | 46.2                                                   | 51.1 | 4.9  | 10.6    |
| 1352             | 1136             | V   | R9102a  |      | -            | 429.15       | 293.15   | 1.0        | 766.3                                            | 775.5 | 9.2   | 1.2     | -                                                      | -    | -    | -       |
| 1353             | 1136             | V   | R9102b  |      | -            | 429.15       | 325.37   | 0.01       | -                                                | -     | -     | -       | 43.8                                                   | 50.1 | 6.2  | 14.2    |
| 1354             | 1137             | V   | R9103a  |      | -            | 432.75       | 293.15   | 1.0        | 759.3                                            | 776.8 | 17.5  | 2.3     | -                                                      | -    | -    | -       |
| 1355             | 1138             | V   | R9104a  |      | -            | 445.15       | 293.15   | 1.0        | 758.0                                            | 783.6 | 25.6  | 3.4     | -                                                      | -    | -    | -       |
| 1356             | 1138             | V   | R9104b  |      | -            | 445.15       | 338.17   | 0.01       | -                                                | -     | -     | -       | 45.8                                                   | 52.2 | 6.4  | 14.0    |
| 1357             | 1139             | V   | R0101a  |      | -            | 445.00       | 338.05   | 0.01       | 737.6                                            | 744.2 | 6.6   | 0.9     | -                                                      | -    | -    | -       |
| 1358             | 1140             | V   | R0102a  |      | -            | -            | 293.15   | 1.0        | 768.6                                            | 796.4 | 27.8  | 3.6     | -                                                      | -    | -    | -       |
| 1359             | 1141             | V   | R0103a  |      | -            | 452.15       | 343.77   | 0.01       | 732.3                                            | 744.6 | 12.3  | 1.7     | 46.7                                                   | 53.5 | 6.8  | 14.6    |
| 1360             | 1142             | V   | R0104a  |      | -            | 464.15       | 293.15   | 1.0        | 768.7                                            | 788.6 | 19.9  | 2.6     | -                                                      | -    | -    | -       |
| 1361             | 1142             | V   | R0104b  |      | -            | 464.15       | 303.0    | 1.0        | -                                                | -     | -     | -       | 54.0                                                   | 59.5 | 5.5  | 10.2    |
| 1362             | 1143             | V   | N7201a  |      | -            | 417.15       | 291.15   | 1.0        | 783.7                                            | 850.9 | 67.2  | 8.6     | -                                                      | -    | -    | -       |
| 1363             | 1143             | V   | N7201b  | ×    | -            | 417.15       | 298.0    | 1.0        | -                                                | -     | -     | -       | 45.3                                                   | 54.2 | 8.9  | 19.7    |
| 1364             | 1144             | V   | N7202a  |      | -            | 429.65       | 429.65   | 1.0        | -                                                | -     | -     | -       | 37.2                                                   | 38.7 | 1.5  | 4.1     |
| 1365             | 1145             | V   | N7203a  |      | -            | 431.65       | 431.65   | 1.0        | -                                                | -     | -     | -       | 37.4                                                   | 42.3 | 4.9  | 13.1    |
| 1366             | 1146             | V   | N7205a  |      | -            | 441.65       | 293.15   | 1.0        | 822.0                                            | 847.5 | 25.5  | 3.1     | 52.4                                                   | 53.4 | 1.0  | 1.8     |
| 1367             | 1147             | V   | N7206a  |      | 298.45       | 497.15       | 298.0    | 1.0        | -                                                | -     | -     | -       | 67.1                                                   | 67.2 | 0.1  | 0.1     |
| 1368             | 1148             | V   | N8201a  | ×    | -            | 437.70       | 298.0    | 1.0        | -                                                | -     | -     | -       | 47.9                                                   | 56.4 | 8.5  | 17.7    |
| 1369             | 1149             | V   | N8202a  |      | -            | 441.15       | 288.15   | 1.0        | 794.2                                            | 853.1 | 58.9  | 7.4     | -                                                      | -    | -    | -       |
| 1370             | 1149             | V   | N8202b  | ×    | -            | 441.15       | 441.15   | 1.0        | -                                                | -     | -     | -       | 38.3                                                   | 49.8 | 11.5 | 30.1    |
| 1371             | 1150             | V   | N8204a  | ×    | -            | 394.15       | 394.15   | 1.0        | -                                                | -     | -     | -       | 33.8                                                   | 44.6 | 10.8 | 31.8    |
| 1372             | 1151             | V   | N8205a  |      | -            | 443.15       | 443.15   | 1.0        | -                                                | -     | -     | -       | 38.5                                                   | 39.6 | 1.2  | 3.1     |
| 1373             | 1152             | V   | N8206a  |      | -            | 457.15       | 288.15   | 1.0        | 848.5                                            | 834.9 | -13.6 | -1.6    | -                                                      | -    | -    | -       |
| 1374             | 1152             | V   | N8206b  |      | -            | 457.15       | 457.15   | 1.0        | -                                                | -     | -     | -       | 39.8                                                   | 32.1 | -7.7 | -19.2   |
| 1375             | 1153             | V   | N8207a  | ×    | -            | 327.65       | 327.65   | 1.0        | -                                                | -     | -     | -       | 27.6                                                   | 54.1 | 26.5 | 95.9    |
| 1376             | 1154             | V   | N8210a  |      | 324.85       | 498.15       | 498.15   | 1.0        | -                                                | -     | -     | -       | 43.7                                                   | 43.2 | -0.5 | -1.1    |
| 1377             | 1155             | V   | N9201a  |      | -            | 438.95       | 293.15   | 1.0        | 800.0                                            | 824.6 | 24.6  | 3.1     | -                                                      | -    | -    | -       |
| 1378             | 1155             | V   | N9201b  |      | -            | 438.95       | 438.95   | 1.0        | -                                                | -     | -     | -       | 38.0                                                   | 45.0 | 7.0  | 18.3    |
| 1379             | 1156             | V   | N9203a  |      | -            | 474.15       | 293.15   | 1.0        | 814.0                                            | 833.4 | 19.4  | 2.4     | -                                                      | -    | -    | -       |
| 1380             | 1156             | V   | N9203b  |      | -            | 474.15       | 474.15   | 1.0        | -                                                | -     | -     | -       | 41.4                                                   | 43.2 | 1.8  | 4.3     |
| 1381             | 1157             | V   | N9204a  |      | -            | 531.65       | 298.0    | 1.0        | -                                                | -     | -     | -       | 75.5                                                   | 76.1 | 0.6  | 0.8     |
| 1382             | 1158             | V   | N0201a  |      | 326.45       | 470.15       | 326.5    | 1.0        | 775.7                                            | 789.7 | 14.0  | 1.8     | -                                                      | -    | -    | -       |
| 1383             | 1159             | V   | N0202a  |      | -            | 465.15       | 298.15   | 1.0        | 808.0                                            | 826.1 | 18.1  | 2.2     | -                                                      | -    | -    | -       |
| 1384             | 1159             | V   | N0202b  | ×    | -            | 465.15       | 465.15   | 1.0        | -                                                | -     | -     | -       | 40.5                                                   | 49.5 | 8.9  | 22.0    |
| 1385             | 1160             | V   | N0203a  |      | -            | 482.65       | 298.15   | 1.0        | 806.0                                            | 844.1 | 38.1  | 4.7     | -                                                      | -    | -    | -       |
| 1386             | 1160             | V   | N0203b  | ×    | -            | 482.65       | 482.65   | 1.0        | -                                                | -     | -     | -       | 42.2                                                   | 54.8 | 12.5 | 29.7    |
| 1387             | 1161             | V   | N0204a  |      | -            | 522.15       | 522.15   | 1.0        | -                                                | -     | -     | -       | 46.0                                                   | 48.8 | 2.8  | 6.0     |
| 1388             | 1162             | V   | N0206a  |      | 332.85       | 485.03       | 345.0    | 1.0        | -                                                | -     | -     | -       | 73.6                                                   | 71.1 | -2.5 | -3.3    |
| 1389             | 1163             | V   | D7401a  |      | 368.6        | 527.15       | 298.15   | 1.0        | -                                                | -     | -     | -       | 82.4                                                   | 83.2 | 0.8  | 1.0     |
| 1390             | 1164             | V   | D8402a  |      | -            | 472.28       | 298.0    | 1.0        | -                                                | -     | -     | -       | 83.6                                                   | 84.1 | 0.5  | 0.6     |

Table S.7 – Comparison of experimental and simulated properties (continued)

| $n_{\text{sim}}$ | $n_{\text{iso}}$ | Set | Outlier | code | $T_m$<br>[K] | $T_b$<br>[K] | T<br>[K] | P<br>[bar] | $\rho_{\text{liq}}[\text{kg}\cdot\text{m}^{-3}]$ |       |       |         | $\Delta H_{\text{vap}}[\text{kJ}\cdot\text{mol}^{-1}]$ |      |      |         |
|------------------|------------------|-----|---------|------|--------------|--------------|----------|------------|--------------------------------------------------|-------|-------|---------|--------------------------------------------------------|------|------|---------|
|                  |                  |     |         |      |              |              |          |            | exp                                              | sim   | dev   | err [%] | exp                                                    | sim  | dev  | err [%] |
| 1391             | 1165             | V   | D8403a  |      | 378.15       | 512.15       | 383.15   | 1.0        | 845.0                                            | 842.8 | -2.2  | -0.3    | -                                                      | -    | -    | -       |
| 1392             | 1165             | V   | D8403b  | ×    | 378.15       | 512.15       | 512.15   | 1.0        | -                                                | -     | -     | -       | 45.0                                                   | 61.5 | 16.4 | 36.5    |
| 1393             | 1166             | V   | D7201a  |      | -            | -            | 298.0    | 1.0        | -                                                | -     | -     | -       | 55.1                                                   | 54.5 | -0.6 | -1.1    |
| 1394             | 1167             | V   | D7202a  |      | -            | 464.15       | 293.15   | 1.0        | 897.2                                            | 881.3 | -15.9 | -1.8    | -                                                      | -    | -    | -       |
| 1395             | 1167             | V   | D7202b  |      | -            | 464.15       | 464.15   | 1.0        | -                                                | -     | -     | -       | 40.5                                                   | 45.5 | 5.0  | 12.5    |
| 1396             | 1168             | V   | D7203a  |      | 222.15       | 458.76       | 298.15   | 1.0        | 896.2                                            | 890.7 | -5.5  | -0.6    | -                                                      | -    | -    | -       |
| 1397             | 1169             | V   | D8201a  |      | -            | 469.15       | 389.2    | 0.06       | 808.8                                            | 813.8 | 5.0   | 0.6     | 46.1                                                   | 50.2 | 4.1  | 8.9     |
| 1398             | 1170             | V   | D8202a  |      | -            | 479.15       | 293.15   | 1.0        | 888.4                                            | 875.0 | -13.4 | -1.5    | -                                                      | -    | -    | -       |
| 1399             | 1170             | V   | D8202b  | ×    | -            | 479.15       | 313.0    | 1.0        | -                                                | -     | -     | -       | 38.7                                                   | 59.2 | 20.6 | 53.1    |
| 1400             | 1171             | V   | D8203a  | ×    | -            | 408.15       | 408.15   | 1.0        | -                                                | -     | -     | -       | 35.1                                                   | 57.9 | 22.7 | 64.7    |
| 1401             | 1172             | V   | D8204a  |      | -            | 482.65       | 290.15   | 1.0        | 899.2                                            | 883.8 | -15.4 | -1.7    | -                                                      | -    | -    | -       |
| 1402             | 1173             | V   | D9201a  |      | -            | 479.15       | 479.15   | 1.0        | -                                                | -     | -     | -       | 41.9                                                   | 45.8 | 3.9  | 9.4     |
| 1403             | 1174             | V   | D9202a  |      | -            | 484.15       | 293.15   | 1.0        | 876.4                                            | 867.4 | -9.0  | -1.0    | -                                                      | -    | -    | -       |
| 1404             | 1174             | V   | D9202b  |      | -            | 484.15       | 484.15   | 1.0        | -                                                | -     | -     | -       | 42.4                                                   | 49.3 | 7.0  | 16.5    |
| 1405             | 1175             | V   | D0202a  | ×    | -            | -            | 388.0    | 1.0        | -                                                | -     | -     | -       | 47.7                                                   | 62.0 | 14.3 | 29.9    |

## S.7 Outliers

In this section, we provide more information on the simulation results considered as outliers (62 simulations concerning 58 molecules) in the comparison between experimental and simulated properties. They correspond to errors larger than  $80.0 \text{ kg}\cdot\text{m}^{-3}$  for  $\rho_{\text{liq}}$  and/or larger than  $8.0 \text{ kJ}\cdot\text{mol}^{-1}$  for  $\Delta H_{\text{vap}}$ . These specific entries of Tab. S.7 are listed again in Tab. S.8, and the corresponding structures are shown in Fig. S.4.

Table S.8: Experimental and simulated properties of the 58 compounds (62 distinct  $P, T$ -points) considered as outliers.

| sim  | mol  | set | code   | $T_m$<br>[K] | $T_b$<br>[K] | $T$<br>[K] | $P$<br>[bar] | $\rho_{\text{liq}}[\text{kg}\cdot\text{m}^{-3}]$ |        |        |         | $\Delta H_{\text{vap}}[\text{kJ}\cdot\text{mol}^{-1}]$ |      |       |         |
|------|------|-----|--------|--------------|--------------|------------|--------------|--------------------------------------------------|--------|--------|---------|--------------------------------------------------------|------|-------|---------|
|      |      |     |        |              |              |            |              | exp                                              | sim    | dev    | err [%] | exp                                                    | sim  | dev   | err [%] |
| 83   | 64   | C   | A6201a | -            | 439.15       | 439.15     | 1.0          | -                                                | -      | -      | -       | 38.1                                                   | 48.1 | 10.1  | 26.4    |
| 131  | 106  | C   | E6406a | -            | -            | 350.0      | 1.0          | -                                                | -      | -      | -       | 68.0                                                   | 57.1 | -10.9 | -16.0   |
| 132  | 107  | C   | E6407a | -            | 452.15       | 452.15     | 1.0          | -                                                | -      | -      | -       | 39.3                                                   | 47.6 | 8.3   | 21.1    |
| 150  | 122  | C   | F5401a | -            | 348.15       | 348.15     | 1.0          | -                                                | -      | -      | -       | 29.5                                                   | 53.4 | 23.9  | 81.1    |
| 151  | 123  | C   | L1101a | 175.65       | 337.85       | 298.15     | 1.01         | 786.7                                            | 885.0  | 98.3   | 12.5    | 37.7                                                   | 42.0 | 4.3   | 11.4    |
| 191  | 157  | C   | L3201a | 213.15       | 460.75       | 298.15     | 1.0          | 1032.5                                           | 985.7  | -46.8  | -4.5    | 62.2                                                   | 71.2 | 9.0   | 14.5    |
| 195  | 160  | C   | L4202b | -            | 455.15       | 332.0      | 1.0          | -                                                | -      | -      | -       | 58.4                                                   | 67.6 | 9.2   | 15.8    |
| 225  | 190  | C   | L6220a | -            | 496.94       | 273.15     | 1.0          | 799.3                                            | 940.7  | 141.4  | 17.7    | -                                                      | -    | -     | -       |
| 262  | 221  | C   | C6207b | 240.15       | 473.65       | 354.0      | 1.0          | -                                                | -      | -      | -       | 91.7                                                   | 63.1 | -28.6 | -31.2   |
| 333  | 280  | C   | R3101a | 156.05       | 276.02       | 273.15     | 1.0          | 655.7                                            | 743.8  | 88.0   | 13.4    | 22.9                                                   | 28.5 | 5.6   | 24.3    |
| 334  | 280  | C   | R3101b | 156.05       | 276.02       | 298.15     | 2.33         | 628.9                                            | 718.0  | 89.1   | 14.2    | -                                                      | -    | -     | -       |
| 355  | 296  | C   | N4201a | -            | 378.65       | 298.15     | 1.0          | 803.0                                            | 886.9  | 83.8   | 10.4    | -                                                      | -    | -     | -       |
| 356  | 296  | C   | N4201b | -            | 378.65       | 378.65     | 1.0          | -                                                | -      | -      | -       | 31.1                                                   | 41.0 | 9.9   | 31.8    |
| 364  | 302  | C   | N4207a | -            | 419.15       | 419.15     | 1.0          | -                                                | -      | -      | -       | 43.7                                                   | 33.3 | -10.5 | -23.9   |
| 366  | 304  | C   | N5201a | -            | 356.15       | 291.15     | 1.0          | 749.1                                            | 854.9  | 105.8  | 14.1    | -                                                      | -    | -     | -       |
| 367  | 304  | C   | N5201b | -            | 356.15       | 298.0      | 1.0          | -                                                | -      | -      | -       | 33.1                                                   | 44.4 | 11.3  | 34.2    |
| 368  | 305  | C   | N5202a | -            | 390.15       | 390.15     | 1.0          | -                                                | -      | -      | -       | 29.7                                                   | 41.3 | 11.6  | 39.1    |
| 376  | 313  | C   | N6201a | 215.15       | 394.15       | 298.15     | 1.0          | 770.0                                            | 846.6  | 76.7   | 9.9     | 41.4                                                   | 50.6 | 9.2   | 22.2    |
| 377  | 314  | C   | N6202a | -            | 407.65       | 298.15     | 1.0          | 738.0                                            | 836.8  | 98.8   | 13.4    | -                                                      | -    | -     | -       |
| 379  | 315  | C   | N6203a | -            | 414.15       | 414.15     | 1.0          | -                                                | -      | -      | -       | 30.6                                                   | 41.5 | 10.9  | 35.6    |
| 380  | 316  | C   | N6205a | -            | 417.15       | 293.15     | 1.0          | 828.0                                            | 858.9  | 30.9   | 3.7     | 45.8                                                   | 54.7 | 8.9   | 19.4    |
| 382  | 317  | C   | N6206b | -            | 419.15       | 419.15     | 1.0          | -                                                | -      | -      | -       | 31.7                                                   | 39.8 | 8.1   | 25.5    |
| 389  | 323  | C   | D2401b | 353.31       | 494.3        | 396.0      | 1.0          | -                                                | -      | -      | -       | 63.8                                                   | 52.0 | -11.8 | -18.6   |
| 391  | 324  | C   | D3401b | 353.05       | 486.15       | 390.0      | 1.0          | -                                                | -      | -      | -       | 63.9                                                   | 54.8 | -9.1  | -14.2   |
| 509  | 431  | V   | O7301a | -            | 426.15       | 426.15     | 1.0          | -                                                | -      | -      | -       | 36.8                                                   | 45.1 | 8.3   | 22.4    |
| 552  | 467  | V   | A0103b | -            | 403.15       | 403.15     | 1.0          | -                                                | -      | -      | -       | 24.3                                                   | 50.8 | 26.5  | 109.3   |
| 668  | 549  | V   | K7207a | -            | 447.20       | 447.2      | 1.0          | -                                                | -      | -      | -       | 38.8                                                   | 47.9 | 9.1   | 23.4    |
| 670  | 551  | V   | K8202a | -            | 417.65       | 311.17     | 0.01         | 909.0                                            | 883.9  | -25.2  | -2.8    | 41.8                                                   | 56.1 | 14.2  | 34.1    |
| 671  | 552  | V   | K8206a | -            | 441.15       | 329.97     | 0.01         | 907.8                                            | 888.9  | -18.9  | -2.1    | 45.3                                                   | 62.5 | 17.2  | 37.9    |
| 677  | 558  | V   | K7301a | -            | 476.65       | 384.0      | 1.0          | -                                                | -      | -      | -       | 54.9                                                   | 75.1 | 20.2  | 36.8    |
| 679  | 559  | V   | K7302b | 322.15       | 455.78       | 455.78     | 1.0          | -                                                | -      | -      | -       | 39.6                                                   | 59.9 | 20.2  | 51.0    |
| 847  | 694  | V   | E7411a | -            | -            | 358.0      | 1.0          | -                                                | -      | -      | -       | 72.1                                                   | 57.8 | -14.3 | -19.9   |
| 859  | 703  | V   | E8411a | -            | -            | 367.0      | 1.0          | -                                                | -      | -      | -       | 74.7                                                   | 60.3 | -14.4 | -19.3   |
| 871  | 713  | V   | E9413a | -            | -            | 382.0      | 1.0          | -                                                | -      | -      | -       | 75.4                                                   | 62.7 | -12.7 | -16.8   |
| 873  | 714  | V   | E9414b | 275.15       | 514.15       | 514.15     | 1.0          | -                                                | -      | -      | -       | 45.2                                                   | 53.9 | 8.7   | 19.2    |
| 876  | 717  | V   | E0404a | -            | 502.15       | 351.0      | 1.0          | -                                                | -      | -      | -       | 55.5                                                   | 64.9 | 9.4   | 16.9    |
| 973  | 797  | V   | L8137b | -            | 432.15       | 345.0      | 1.0          | -                                                | -      | -      | -       | 49.2                                                   | 57.3 | 8.1   | 16.5    |
| 984  | 804  | V   | L8146b | 150.15       | 428.55       | 318.66     | 0.01         | -                                                | -      | -      | -       | 43.5                                                   | 64.4 | 20.8  | 47.8    |
| 986  | 805  | V   | L8147b | -            | 437.85       | 355.0      | 1.0          | -                                                | -      | -      | -       | 48.0                                                   | 58.1 | 10.1  | 21.0    |
| 988  | 806  | V   | L8148b | -            | 439.25       | 356.0      | 1.0          | -                                                | -      | -      | -       | 48.0                                                   | 58.7 | 10.7  | 22.3    |
| 999  | 813  | V   | L8156b | 212.15       | 445.05       | 363.0      | 1.0          | -                                                | -      | -      | -       | 47.2                                                   | 57.9 | 10.7  | 22.8    |
| 1116 | 919  | V   | L0129a | -            | 455.00       | 289.15     | 1.0          | 751.3                                            | 840.1  | 88.8   | 11.8    | -                                                      | -    | -     | -       |
| 1157 | 959  | V   | L0179b | -            | 485.15       | 356.0      | 1.0          | -                                                | -      | -      | -       | 79.1                                                   | 68.9 | -10.2 | -12.9   |
| 1209 | 1010 | V   | L8220b | 332.75       | 544.15       | 356.0      | 1.0          | -                                                | -      | -      | -       | 101.0                                                  | 92.2 | -8.8  | -8.7    |
| 1226 | 1025 | V   | L0204a | -            | -            | 353.0      | 1.0          | -                                                | -      | -      | -       | 63.4                                                   | 81.6 | 18.2  | 28.7    |
| 1234 | 1032 | V   | L0213b | 345.55       | 572.15       | 364.0      | 1.0          | -                                                | -      | -      | -       | 112.4                                                  | 98.8 | -13.6 | -12.1   |
| 1273 | 1069 | V   | C7403a | 376.65       | 464.16       | 479.85     | 0.01         | 1198.8                                           | 1029.9 | -168.8 | -14.1   | -                                                      | -    | -     | -       |
| 1274 | 1070 | V   | C7409a | 377.55       | 464.16       | 486.25     | 0.01         | 1100.1                                           | 996.4  | -103.7 | -9.4    | -                                                      | -    | -     | -       |
| 1280 | 1074 | V   | C0403a | 404.15       | 642.09       | 507.79     | 0.01         | 1026.1                                           | 913.1  | -113.0 | -11.0   | -                                                      | -    | -     | -       |
| 1281 | 1074 | V   | C0403b | 404.15       | 642.09       | 471.0      | 1.0          | -                                                | -      | -      | -       | 85.9                                                   | 99.5 | 13.7  | 15.9    |
| 1317 | 1105 | V   | N9101a | -            | 417.15       | 315.77     | 0.01         | 756.4                                            | 894.2  | 137.8  | 18.2    | -                                                      | -    | -     | -       |
| 1363 | 1143 | V   | N7201b | -            | 417.15       | 298.0      | 1.0          | -                                                | -      | -      | -       | 45.3                                                   | 54.2 | 8.9   | 19.7    |
| 1368 | 1148 | V   | N8201a | -            | 437.70       | 298.0      | 1.0          | -                                                | -      | -      | -       | 47.9                                                   | 56.4 | 8.5   | 17.7    |
| 1370 | 1149 | V   | N8202b | -            | 441.15       | 441.15     | 1.0          | -                                                | -      | -      | -       | 38.3                                                   | 49.8 | 11.5  | 30.1    |
| 1371 | 1150 | V   | N8204a | -            | 394.15       | 394.15     | 1.0          | -                                                | -      | -      | -       | 33.8                                                   | 44.6 | 10.8  | 31.8    |
| 1375 | 1153 | V   | N8207a | -            | 327.65       | 327.65     | 1.0          | -                                                | -      | -      | -       | 27.6                                                   | 54.1 | 26.5  | 95.9    |
| 1384 | 1159 | V   | N0202b | -            | 465.15       | 465.15     | 1.0          | -                                                | -      | -      | -       | 40.5                                                   | 49.5 | 8.9   | 22.0    |
| 1386 | 1160 | V   | N0203b | -            | 482.65       | 482.65     | 1.0          | -                                                | -      | -      | -       | 42.2                                                   | 54.8 | 12.5  | 29.7    |
| 1392 | 1165 | V   | D8403b | 378.15       | 512.15       | 512.15     | 1.0          | -                                                | -      | -      | -       | 45.0                                                   | 61.5 | 16.4  | 36.5    |

Table S.8 – *Continued from previous page*Table S.8 – Experimental and simulated properties of the 62 distinct  $P, T$ -points considered as outliers.

| sim  | mol  | set | code   | $T_m$<br>[K] | $T_m$<br>[K] | T<br>[K] | P<br>[bar] | $\rho_{\text{liq}}[\text{kg}\cdot\text{m}^{-3}]$ |     |     |         | $\Delta H_{\text{vap}}[\text{kJ}\cdot\text{mol}^{-1}]$ |      |      |         |
|------|------|-----|--------|--------------|--------------|----------|------------|--------------------------------------------------|-----|-----|---------|--------------------------------------------------------|------|------|---------|
|      |      |     |        |              |              |          |            | exp                                              | sim | dev | err [%] | exp                                                    | sim  | dev  | err [%] |
| 1399 | 1170 | V   | D8202b | -            | 479.15       | 313.0    | 1.0        | -                                                | -   | -   | -       | 38.7                                                   | 59.2 | 20.6 | 53.1    |
| 1400 | 1171 | V   | D8203a | -            | 408.15       | 408.15   | 1.0        | -                                                | -   | -   | -       | 35.1                                                   | 57.9 | 22.7 | 64.7    |
| 1405 | 1175 | V   | D0202a | -            | -            | 388.0    | 1.0        | -                                                | -   | -   | -       | 47.7                                                   | 62.0 | 14.3 | 29.9    |

Figure S.4: Structure of the 58 compounds considered as outliers.

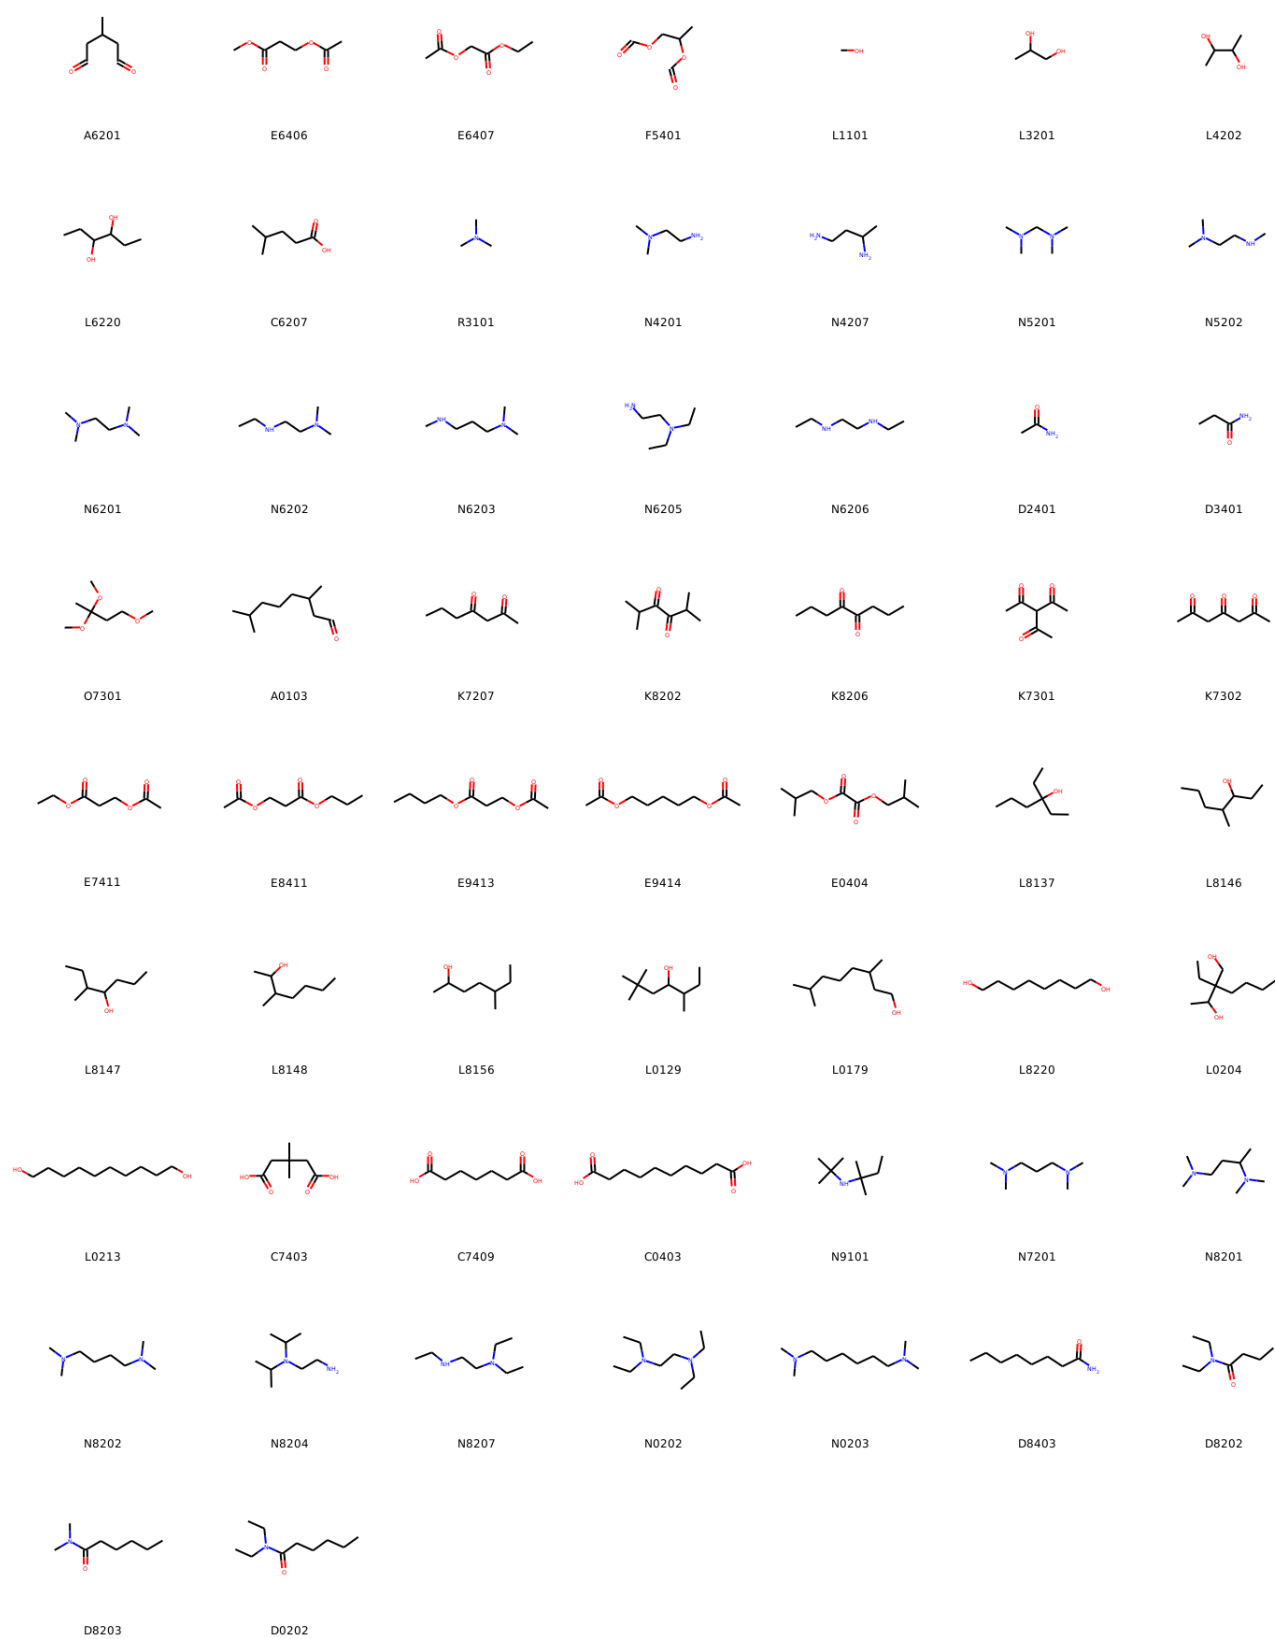

## S.8 Comparison with the 2016H66 Parameter Set

This section provides a comparison between the presently reoptimized force field and the original 2016H66 parameter set.<sup>112</sup> The parametrization of 2016H66 relied on 17 compounds of the O+N family for the calibration and 26 for the validation. The corresponding results are reported in Tab. S.9. The final RMSD values for the calibration set are 19.2 kg·m<sup>-3</sup> for  $\rho_{\text{liq}}$  and 3.4 kJ·mol<sup>-1</sup> for  $\Delta H_{\text{vap}}$ . The corresponding values are slightly higher for the validation set, namely 33.5 kg·m<sup>-3</sup> for  $\rho_{\text{liq}}$  and 4.3 kJ·mol<sup>-1</sup> for  $\Delta H_{\text{vap}}$ .

| Code        | Name                | T<br>K | $\rho_{\text{liq}}^{\text{ref}}$<br>kg·m <sup>-3</sup> | $\rho_{\text{liq}}^{\text{sim}}$<br>kg·m <sup>-3</sup> | $\Delta H_{\text{vap}}^{\text{ref}}$<br>kJ·mol <sup>-1</sup> | $\Delta H_{\text{vap}}^{\text{sim}}$<br>kJ·mol <sup>-1</sup> |
|-------------|---------------------|--------|--------------------------------------------------------|--------------------------------------------------------|--------------------------------------------------------------|--------------------------------------------------------------|
| Calibration |                     |        |                                                        |                                                        |                                                              |                                                              |
| ETL         | ethanol             | 298    | 784.9                                                  | 776.9                                                  | 42.3                                                         | 45.9                                                         |
| 1PL         | propanol            | 298    | 799.6                                                  | 783.1                                                  | 47.5                                                         | 50.3                                                         |
| DME         | methoxymethane      | 254    | 722.0                                                  | 713.5                                                  | 21.2                                                         | 23.8                                                         |
| DEE         | ethoxyethane        | 298    | 707.8                                                  | 693.8                                                  | 27.1                                                         | 29.1                                                         |
| DXE         | 1,2-dimethoxyethane | 298    | 863.7                                                  | 833.2                                                  | 36.4                                                         | 40.1                                                         |
| EAL         | acetaldehyde        | 298    | 778.0                                                  | 789.5                                                  | 26.1                                                         | 31.3                                                         |
| PPN         | propanone           | 298    | 784.4                                                  | 811.8                                                  | 31.3                                                         | 33.6                                                         |
| BTN         | butanone            | 298    | 799.7                                                  | 800.8                                                  | 34.5                                                         | 36.0                                                         |
| ACA         | acetic acid         | 298    | 1043.9                                                 | 1075.1                                                 | 51.6                                                         | 58.2                                                         |
| EAE         | ethylacetate        | 298    | 894.5                                                  | 871.1                                                  | 35.6                                                         | 36.2                                                         |
| PAE         | propylacetate       | 298    | 883.0                                                  | 861.5                                                  | 39.8                                                         | 40.1                                                         |
| EAN         | ethylamine          | 298    | 677.0                                                  | 692.9                                                  | 26.6                                                         | 30.3                                                         |
| DEAN        | diethylamine        | 298    | 701.6                                                  | 723.6                                                  | 31.3                                                         | 33.6                                                         |
| TEAN        | triethylamine       | 298    | 723.0                                                  | 749.9                                                  | 34.8                                                         | 39.1                                                         |
| AMD         | acetamide           | 364    | 989.2                                                  | 1005.1                                                 | 56.1                                                         | 60.6                                                         |
| LNMA        | N-methylacetamide   | 333    | 926.0                                                  | 914.0                                                  | 54.4                                                         | 57.0                                                         |
| DAMD        | dimethylacetamide   | 298    | 936.3                                                  | 930.7                                                  | 49.1                                                         | 46.8                                                         |
| Validation  |                     |        |                                                        |                                                        |                                                              |                                                              |
| MTL         | methanol            | 298    | 784.0                                                  | 822.5                                                  | 37.4                                                         | 43.1                                                         |
| BTL         | butanol             | 298    | 805.8                                                  | 791.2                                                  | 52.3                                                         | 55.2                                                         |
| PTL         | pentanol            | 298    | 810.8                                                  | 797.3                                                  | 56.9                                                         | 60.0                                                         |
| HXL         | hexanol             | 298    | 815.3                                                  | 803.2                                                  | 61.9                                                         | 65.1                                                         |
| HPL         | heptanol            | 298    | 820.0                                                  | 806.8                                                  | 66.8                                                         | 69.8                                                         |
| OTL         | octanol             | 298    | 821.6                                                  | 810.5                                                  | 71.0                                                         | 74.8                                                         |
| 2PL         | propan-2-ol         | 298    | 780.0                                                  | 733.4                                                  | 45.5                                                         | 44.5                                                         |
| 2BTL        | butan-2-ol          | 298    | 802.4                                                  | 763.1                                                  | 49.7                                                         | 49.3                                                         |
| 2PTL        | pentan-2-ol         | 298    | 805.4                                                  | 773.7                                                  | 53.1                                                         | 54.0                                                         |
| 3PTL        | pentan-3-ol         | 298    | 816.0                                                  | 778.1                                                  | 53.1                                                         | 53.9                                                         |
| 2M2P        | 2-methylpropan-2-ol | 298    | 781.2                                                  | 730.8                                                  | 46.8                                                         | 41.0                                                         |
| 2M2B        | 2-methylbutan-2-ol  | 298    | 805.0                                                  | 769.2                                                  | 50.2                                                         | 46.3                                                         |
| MPH         | 1-methoxypropane    | 298    | 735.6                                                  | 704.5                                                  | 27.6                                                         | 29.8                                                         |
| PAL         | propionaldehyde     | 298    | 791.2                                                  | 779.5                                                  | 29.6                                                         | 34.5                                                         |
| BAL         | butyraldehyde       | 298    | 796.4                                                  | 790.8                                                  | 33.7                                                         | 39.0                                                         |
| 2PN         | pentan-2-one        | 298    | 801.5                                                  | 804.5                                                  | 38.4                                                         | 40.5                                                         |
| 3PN         | pentan-3-one        | 298    | 809.5                                                  | 794.4                                                  | 38.6                                                         | 38.7                                                         |
| 2HN         | hexan-2-one         | 298    | 806.7                                                  | 808.8                                                  | 42.9                                                         | 45.1                                                         |
| 3HN         | hexan-3-one         | 298    | 810.0                                                  | 798.6                                                  | 42.5                                                         | 43.2                                                         |
| PPA         | propionic acid      | 298    | 988.1                                                  | 978.1                                                  | 57.3                                                         | 61.6                                                         |
| BTA         | butyric acid        | 298    | 953.2                                                  | 950.5                                                  | 58.0                                                         | 66.7                                                         |
| MPE         | methylpropionate    | 298    | 909.0                                                  | 872.9                                                  | 35.9                                                         | 36.3                                                         |
| BAE         | butylacetate        | 298    | 876.4                                                  | 858.1                                                  | 43.6                                                         | 44.8                                                         |
| PAN         | propylamine         | 298    | 712.1                                                  | 726.4                                                  | 31.3                                                         | 34.7                                                         |
| BAN         | butylamine          | 298    | 736.8                                                  | 737.8                                                  | 35.7                                                         | 38.9                                                         |
| EDAN        | ethylenediamine     | 298    | 893.1                                                  | 1009.2                                                 | 46.0                                                         | 59.0                                                         |

Table S.9: Experimental and simulated values of  $\rho_{\text{liq}}$  and  $\Delta H_{\text{vap}}$  for the 43 O+N compounds from the 2016H66 article.<sup>112</sup> The corresponding RMSD values over the calibration (validation) sets are 19.2 (33.5) kg·m<sup>-3</sup> for  $\rho_{\text{liq}}$  and 3.4 (4.3) kJ·mol<sup>-1</sup> for  $\Delta H_{\text{vap}}$ .

Considering the same 43 molecules, similar values are obtained when using the initial parameters of the present force field (*i.e.* before optimization), as listed in Tab. S.10 (entries “A”). This is expected as these initial parameters are identical (LJ parameters) and very close (charge-fitted EE model) to those of the 2016H66 parameter set (see Sec. S.4).

A statistics extending to the entire set of molecules with up to ten carbon atoms (excluding

| Code               | $m$ | Calibration             |                     |      |                             |                         |     | Validation              |                     |      |                             |                         |     |
|--------------------|-----|-------------------------|---------------------|------|-----------------------------|-------------------------|-----|-------------------------|---------------------|------|-----------------------------|-------------------------|-----|
|                    |     | $N_{\rho}^{\text{cal}}$ | $\rho_{\text{liq}}$ |      | $N_{\Delta H}^{\text{cal}}$ | $\Delta H_{\text{vap}}$ |     | $N_{\rho}^{\text{val}}$ | $\rho_{\text{liq}}$ |      | $N_{\Delta H}^{\text{val}}$ | $\Delta H_{\text{vap}}$ |     |
|                    |     |                         | A                   | B    |                             | A                       | B   |                         | A                   | B    |                             | A                       | B   |
| ROR                | 1   | 2                       | 13.3                | 17.2 | 2                           | 1.8                     | 1.0 | 1                       | 14.8                | 11.0 | 1                           | 1.5                     | 0.9 |
|                    | 2   | 1                       | 28.5                | 10.1 | 1                           | 2.9                     | 3.3 | -                       | -                   | -    | -                           | -                       | -   |
| RCOH               | 1   | 1                       | 21.5                | 10.0 | 1                           | 4.1                     | 4.8 | 2                       | 5.1                 | 15.2 | 2                           | 4.8                     | 0.4 |
| RCOR               | 1   | 2                       | 21.6                | 7.9  | 2                           | 1.6                     | 2.0 | 4                       | 9.6                 | 13.4 | 4                           | 2.0                     | 1.1 |
| RCOOR              | 1   | 2                       | 22.8                | 2.0  | 2                           | 0.5                     | 0.8 | 2                       | 29.4                | 23.1 | 2                           | 1.1                     | 1.0 |
| ROH                | 1   | 2                       | 13.2                | 21.8 | 2                           | 3.3                     | 3.3 | 12                      | 30.6                | 39.8 | 12                          | 3.4                     | 1.5 |
| RCOOH              | 1   | 1                       | 29.8                | 1.6  | 1                           | 5.5                     | 8.1 | 2                       | 4.9                 | 4.4  | 2                           | 7.2                     | 0.9 |
| RNH <sub>2</sub>   | 1   | 1                       | 34.7                | 8.4  | 1                           | 4.4                     | 2.8 | 2                       | 13.6                | 1.2  | 2                           | 3.5                     | 0.7 |
| RNHR               | 1   | 1                       | 18.6                | 16.4 | 1                           | 1.9                     | 2.8 | -                       | -                   | -    | -                           | -                       | -   |
| RNR <sub>2</sub>   | 1   | 1                       | 27.0                | 3.7  | 1                           | 3.7                     | 1.2 | -                       | -                   | -    | -                           | -                       | -   |
| RN <sub>2</sub> *  | 2   | -                       | -                   | -    | -                           | -                       | -   | 1                       | 118.8               | 79.0 | 1                           | 13.8                    | 4.1 |
| RCONH <sub>2</sub> | 1   | 1                       | 11.1                | 8.7  | 1                           | 6.0                     | 5.7 | -                       | -                   | -    | -                           | -                       | -   |
| RCONHR             | 1   | 1                       | 12.6                | 35.0 | 1                           | 2.9                     | 3.7 | -                       | -                   | -    | -                           | -                       | -   |
| RCONR <sub>2</sub> | 1   | 1                       | 4.6                 | 9.9  | 1                           | 4.2                     | 3.3 | -                       | -                   | -    | -                           | -                       | -   |
| All                | -   | 17                      | 20.9                | 14.6 | 17                          | 3.3                     | 3.5 | 26                      | 32.9                | 32.6 | 26                          | 4.5                     | 1.4 |

Table S.10: Statistics concerning the discrepancies between simulated and experimental properties for the 43 O+N compounds from the 2016H66 article,<sup>112</sup> using the initial values A (2016H66-like) and the final values B (reoptimized) of the parameters. The results are reported for the calibration set (left) and the validation set (right). For selected groups of molecules Main Article Tab. 2, the number  $N_{\rho}^{\text{cal}}$  of experimental  $\rho_{\text{liq}}$  values and the number  $N_{\Delta H}^{\text{cal}}$  of experimental  $\Delta H_{\text{vap}}$  values are reported, along with the root-mean-square deviation (RMSD) between simulated and experiment for both properties.

the formate esters because they were not included in 2016H66) is shown in Tab. S.11 (entries “A”). When the calibration and validation sets are compared, the increase in the aliphatic content results in smaller deviations for  $\rho_{\text{liq}}$ , from 37.7 to 23.4 kg·m<sup>-3</sup>, and slightly higher deviations for  $\Delta H_{\text{vap}}$ , from 5.3 to 6.6 kJ·mol<sup>-1</sup>. A slight improvement is expected, as the pairwise interactions between aliphatic groups are comparatively easier to describe, and already very well reproduced in the GROMOS force field.<sup>135–137</sup> A very significant difference is observed when comparing mono- and polyfunctional groups. For the monofunctional compounds, the RMSD values are 26.7 (18.4) kg·m<sup>-3</sup> and 4.2 (5.3) kJ·mol<sup>-1</sup> for the calibration (validation) set. For the polyfunctional compounds, they are much higher, namely 55.0 (38.0) kg·m<sup>-3</sup> and 7.2 (8.7) kJ·mol<sup>-1</sup>, respectively.

After optimization of the non-bonded parameters, the agreement with experiment is improved as shown in Tabs. S.10 and S.11 (entries “B”). The reoptimized parameters lead to a smaller RMSD for the set of 43 compounds (Tab. S.10). The RMSD for the 17 compounds of the calibration set of 2016H66 decreases from 20.9 to 14.6 kg·m<sup>-3</sup> for  $\rho_{\text{liq}}$ . For  $\Delta H_{\text{vap}}$  a very slight increase is observed, from 3.3 to 3.5 kJ·mol<sup>-1</sup>. Improvements in the results for the molecules in the validation set of 2016H66 are only observed for  $\Delta H_{\text{vap}}$ , where the RMSD decreases from 4.5 to 1.4 kJ·mol<sup>-1</sup>. For  $\rho_{\text{liq}}$  the results remain essentially the same, with a negligible change from 32.9 to 32.6 kg·m<sup>-3</sup>. Similar trends are observed when considering the entire set of molecules (Tab. S.11). Note that the inclusion of polyfunctional molecules in the recalibration does not negatively affect the results for the 43 compounds of 2016H66.

| Code               | $m$ | Calibration             |                     |      |                             |                         |     | Validation              |                     |       |                             |                         |      |
|--------------------|-----|-------------------------|---------------------|------|-----------------------------|-------------------------|-----|-------------------------|---------------------|-------|-----------------------------|-------------------------|------|
|                    |     | $N_{\rho}^{\text{cal}}$ | $\rho_{\text{liq}}$ |      | $N_{\Delta H}^{\text{cal}}$ | $\Delta H_{\text{vap}}$ |     | $N_{\rho}^{\text{val}}$ | $\rho_{\text{liq}}$ |       | $N_{\Delta H}^{\text{val}}$ | $\Delta H_{\text{vap}}$ |      |
|                    |     |                         | A                   | B    |                             | A                       | B   |                         | A                   | B     |                             | A                       | B    |
| ROR                | 1   | 28                      | 17.8                | 15.7 | 23                          | 2.1                     | 1.8 | 56                      | 15.1                | 15.4  | 19                          | 2.0                     | 1.5  |
|                    | 2   | 11                      | 43.1                | 37.8 | 12                          | 3.7                     | 2.7 | 28                      | 32.5                | 30.4  | 17                          | 2.8                     | 2.1  |
|                    | 3   | 3                       | 67.5                | 51.5 | 4                           | 6.5                     | 3.5 | 6                       | 38.1                | 39.0  | 11                          | 3.9                     | 3.7  |
|                    | 4   | 1                       | 119.0               | 64.2 | 2                           | 4.0                     | 0.6 | 3                       | 58.3                | 42.1  | 3                           | 2.6                     | 1.5  |
|                    | 1-4 | 43                      | 36.4                | 28.4 | 41                          | 3.4                     | 2.3 | 93                      | 25.7                | 24.0  | 50                          | 2.8                     | 2.3  |
| RCOH               | 1   | 16                      | 20.2                | 27.3 | 13                          | 5.1                     | 1.7 | 21                      | 19.0                | 21.9  | 8                           | 12.0                    | 9.6  |
|                    | 2   | 2                       | 38.8                | 50.1 | 2                           | 12.1                    | 7.3 | 0                       | -                   | -     | 0                           | -                       | -    |
|                    | 1-2 | 18                      | 23.0                | 30.7 | 15                          | 6.51                    | 3.1 | 21                      | 19.0                | 21.9  | 8                           | 12.0                    | 9.6  |
| RCOR               | 1   | 11                      | 14.4                | 15.2 | 11                          | 1.5                     | 0.9 | 73                      | 11.3                | 12.8  | 49                          | 4.1                     | 3.3  |
|                    | 2   | 3                       | 28.7                | 24.8 | 3                           | 7.2                     | 5.1 | 11                      | 19.0                | 18.0  | 6                           | 12.3                    | 10.5 |
|                    | 3   | 0                       | -                   | -    | 0                           | -                       | -   | 1                       | 11.6                | 9.6   | 2                           | 25.0                    | 20.2 |
|                    | 1-3 | 14                      | 18.4                | 17.7 | 14                          | 3.6                     | 2.5 | 85                      | 12.6                | 13.5  | 57                          | 7.2                     | 5.9  |
| RCOOR              | 1   | 20                      | 27.0                | 24.1 | 19                          | 1.1                     | 1.1 | 115                     | 21.0                | 21.1  | 70                          | 3.5                     | 3.2  |
|                    | 2   | 6                       | 50.7                | 45.4 | 9                           | 5.0                     | 4.9 | 27                      | 40.3                | 37.5  | 38                          | 6.7                     | 5.9  |
|                    | 1-2 | 26                      | 33.9                | 30.4 | 28                          | 3.0                     | 2.9 | 142                     | 25.8                | 25.1  | 108                         | 4.9                     | 4.3  |
| ROH                | 1   | 33                      | 24.7                | 28.4 | 32                          | 3.3                     | 2.1 | 247                     | 16.7                | 16.1  | 55                          | 5.5                     | 5.1  |
|                    | 2   | 45                      | 45.6                | 34.5 | 12                          | 6.1                     | 5.2 | 52                      | 26.8                | 21.6  | 10                          | 8.6                     | 8.7  |
|                    | 3   | 5                       | 74.0                | 38.4 | 1                           | 1.3                     | 1.9 | 1                       | 38.1                | 8.2   | 0                           | -                       | -    |
|                    | 1-3 | 83                      | 41.2                | 32.5 | 45                          | 4.2                     | 3.2 | 300                     | 18.9                | 17.2  | 65                          | 6.1                     | 5.8  |
| RCOOH              | 1   | 17                      | 17.5                | 12.0 | 13                          | 8.9                     | 8.0 | 35                      | 16.0                | 17.1  | 7                           | 8.9                     | 3.1  |
|                    | 2   | 0                       | -                   | -    | 0                           | -                       | -   | 5                       | 106.1               | 107.6 | 4                           | 20.5                    | 8.1  |
|                    | 1-2 | 17                      | 17.5                | 12.0 | 13                          | 8.9                     | 8.0 | 40                      | 40.4                | 41.3  | 11                          | 13.5                    | 5.5  |
| RNH <sub>2</sub>   | 1   | 34                      | 27.7                | 20.2 | 22                          | 3.8                     | 2.1 | 17                      | 12.5                | 14.1  | 9                           | 3.7                     | 2.2  |
| RNHR               | 1   | 25                      | 34.8                | 22.0 | 19                          | 2.5                     | 1.4 | 16                      | 37.9                | 36.2  | 10                          | 2.4                     | 1.8  |
| R <sub>3</sub> N   | 1   | 13                      | 50.3                | 46.1 | 12                          | 4.2                     | 3.6 | 31                      | 27.7                | 25.6  | 17                          | 5.5                     | 4.9  |
| RN <sub>2</sub> *  | 2   | 16                      | 74.1                | 57.8 | 31                          | 8.9                     | 6.1 | 9                       | 40.8                | 36.2  | 19                          | 10.6                    | 8.9  |
|                    | 1-2 | 88                      | 44.9                | 34.9 | 84                          | 6.1                     | 4.1 | 73                      | 29.7                | 27.8  | 55                          | 7.2                     | 6.0  |
| RCONH <sub>2</sub> | 1   | 4                       | 13.2                | 15.6 | 4                           | 9.2                     | 8.7 | 1                       | 0.1                 | 2.2   | 3                           | 13.9                    | 9.5  |
| RCONHR             | 1   | 4                       | 12.2                | 10.7 | 7                           | 5.9                     | 3.1 | 0                       | -                   | -     | 0                           | -                       | -    |
| RCONR <sub>2</sub> | 1   | 4                       | 12.8                | 8.7  | 2                           | 3.5                     | 0.5 | 6                       | 14.5                | 11.6  | 8                           | 10.5                    | 12.5 |
|                    | 1   | 12                      | 12.7                | 12.0 | 13                          | 6.8                     | 5.4 | 7                       | 13.4                | 10.8  | 11                          | 11.6                    | 11.8 |
| NHB                | -   | 118                     | 33.8                | 30.3 | 112                         | 4.0                     | 2.7 | 378                     | 23.1                | 22.4  | 248                         | 5.9                     | 5.2  |
| HBD                | -   | 183                     | 39.9                | 30.6 | 141                         | 4.6                     | 4.6 | 383                     | 23.6                | 22.4  | 117                         | 7.8                     | 6.1  |
| All                | 1   | 209                     | 26.7                | 23.7 | 177                         | 4.2                     | 3.2 | 618                     | 18.4                | 18.3  | 255                         | 5.3                     | 4.6  |
|                    | > 1 | 92                      | 55.0                | 41.9 | 76                          | 7.2                     | 5.1 | 143                     | 38.0                | 35.1  | 110                         | 8.7                     | 7.1  |
|                    | -   | 301                     | 37.7                | 30.4 | 253                         | 5.3                     | 3.9 | 761                     | 23.4                | 22.4  | 365                         | 6.6                     | 5.5  |

Table S.11: Statistics concerning the discrepancies between simulated and experimental properties using the initial values A (2016H66-like) and the final values B (reoptimized) of the parameters. For selected groups of molecules (Tab. 2) and number  $m$  of occurrences of the functional group in the molecule, the number  $N_{\rho}^{\text{cal}}$  of experimental  $\rho_{\text{liq}}$  values and the number  $N_{\Delta H}^{\text{cal}}$  of experimental  $\Delta H_{\text{vap}}$  values are reported, along with the root-mean-square deviation (RMSD) and the average deviation (AVED) between simulation and experiment for both properties. The results are reported for the calibration set (left) and the validation set (right) excluding formate esters (because they were not included in 2016H66). The last three lines refer to non-hydrogen-bonding (NHB), hydrogen-bonding (HBD), and the entire set (All) of molecules.
